# Supplementary material for: RNA Sequencing Analysis of CD4+ T Cells Exposed to Airway Fluid From Children With Pediatric Acute Respiratory Distress Syndrome
Source: PubMed Central journal article supplement — Crit Care Explor. 2023 Jun 23;5(7):e0935. doi: 10.1097/CCE.0000000000000935 (PMC10292738; doi:10.1097/cce.0000000000000935), 2023-06-23

## ONLINE SUPPLEMENT

### **RNASeq Analysis of CD4<sup>+</sup> T Cells Exposed to Airway Fluid from Children with Pediatric Acute Respiratory Distress Syndrome**

Michael J. Ripple, MD, PhD, Min Huang, Susan T. Stephenson, PhD, Ahmad F. Mohammad, BS<sup>2</sup>, Mallory Tidwell, RN, Anne M. Fitzpatrick, PhD, Rishikesan Kamaleswaran, PhD, and Jocelyn R. Grunwell, MD, PhD

#### **Table of Contents:**

**Supplemental Figure 1.** Flow diagram of participant tracheal aspirate airway fluid samples used in the CD4<sup>+</sup> T cell donor transcriptomic reporter assay. QC = quality control.

**Supplemental Figure 2.** Volcano plots of differentially expressed genes (A) and pathway analysis (B) from viral versus non-viral triggered pediatric acute respiratory distress syndrome (PARDS). Each circle is a gene. Blue circles represent downregulated genes that have at least a 2-fold change with a false discovery rate of < 0.05. Red circles represent upregulated genes that have at least a 2-fold change with a false discovery rate of < 0.05. Dashed lines indicate the x-axis threshold of  $|\log_2[\text{fold change}]| > 1$  and the y-axis threshold of  $\log_{10}[p\text{-value}] < 0.05$ .

**Supplemental Digital Content E1 (E1\_mildcontrol\_down.csv).** Differentially expressed genes (DEGs), downregulated, mild PARDS versus control patients.

**Supplemental Digital Content E2 (E2\_mildcontrol\_up.csv).** DEGs, upregulated, mild PARDS versus control patients.

**Supplemental Digital Content E3 (E3\_severecontrol\_down.csv).** DEGs, downregulated, severe PARDS versus control patients.

**Supplemental Digital Content E4 (E4\_severecontrol\_up.csv).** DEGs, upregulated, severe PARDS versus control patients.

**Supplemental Digital Content E5 (E5\_severemild\_down.csv).** DEGs, downregulated, severe PARDS versus mild PARDS patients.

**Supplemental Digital Content E6 (E6\_severemild\_up.csv).** DEGs, upregulated, severe PARDS versus mild PARDS patients.

**Supplemental Digital Content E7 (E7\_severemild\_down\_reactome.csv).** Reactome significantly enriched functional networks, severe PARDS versus mild PARDS patients.

**Supplemental Digital Content E8 (E8\_severecontrol\_down\_reactome.csv).** Reactome, significantly enriched functional networks, severe PARDS versus control patients.

## Supplemental Figure 1.

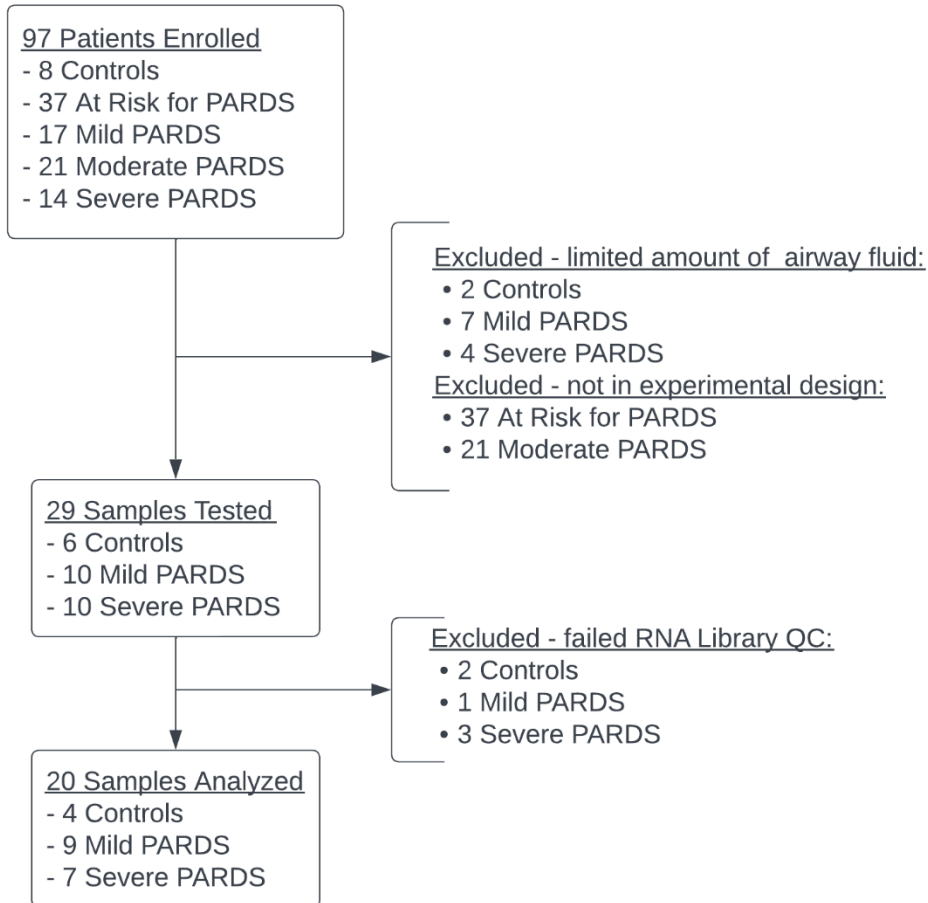

**Supplemental Figure 2.**

**A.**

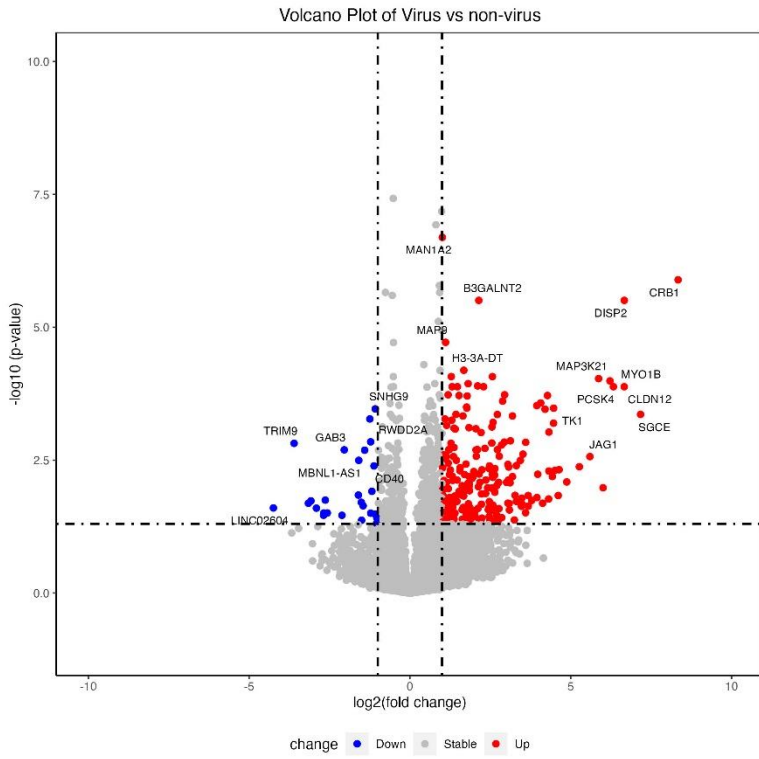

**B.**

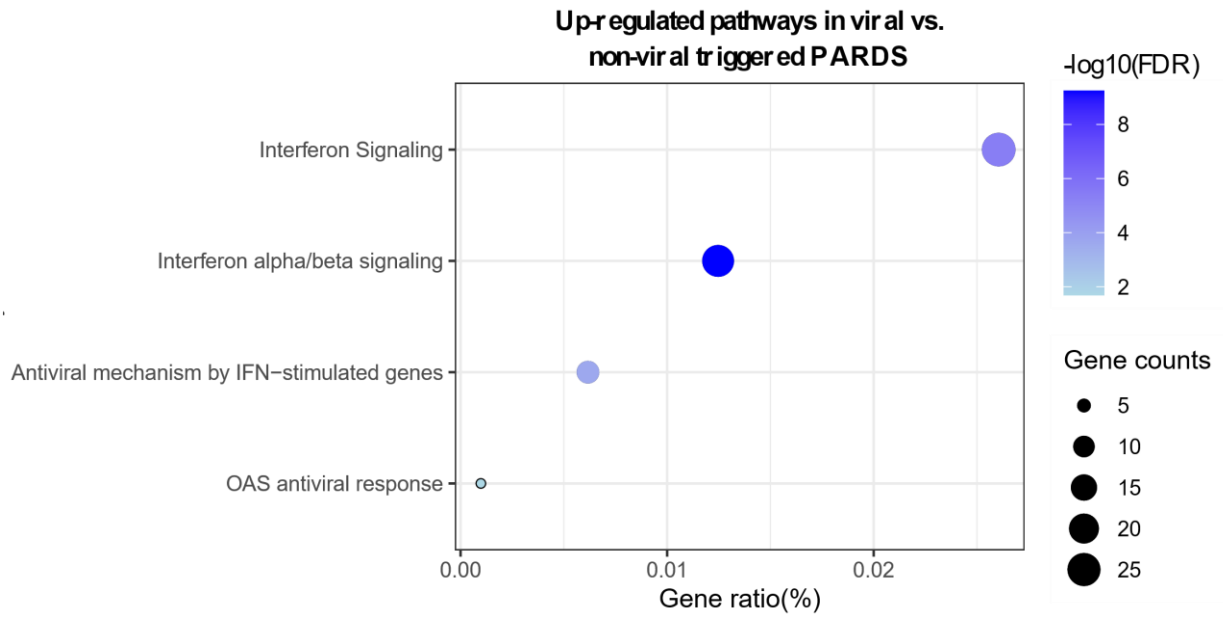

Supplement: cc9-5-e0935-s001.pdf [file cc9-5-e0935-s001.pdf]
