# Supplementary material for: RNA Sequencing Analysis of CD4+ T Cells Exposed to Airway Fluid From Children With Pediatric Acute Respiratory Distress Syndrome
Source: PubMed Central journal article supplement — Crit Care Explor. 2023 Jun 23;5(7):e0935. doi: 10.1097/CCE.0000000000000935 (PMC10292738; doi:10.1097/cce.0000000000000935), 2023-06-23
Supplement: cc9-5-e0935-s002.pdf [file cc9-5-e0935-s002.pdf]

## E1\_mildcontrol\_down

| Gene Symbol     | baseMean    | Log2 Fold Change | Log2 Fold Change | Standard Error |
|-----------------|-------------|------------------|------------------|----------------|
| PLEKHA2         | 387.9061295 | -1.321435095     |                  | 0.204311836    |
| PHKB            | 1023.298099 | -1.00402532      |                  | 0.17920284     |
| LINC01355       | 145.8376215 | -1.800308827     |                  | 0.330320139    |
| ST3GAL3         | 215.4708461 | -1.737427222     |                  | 0.328306079    |
| SCGB3A1         | 145.9765215 | -4.93118343      |                  | 0.943011573    |
| RGS2            | 3248.944325 | -1.528519925     |                  | 0.306617995    |
| HIVEP1          | 497.4617541 | -1.335946996     |                  | 0.270474565    |
| MED1            | 953.8821903 | -1.109057025     |                  | 0.235652512    |
| TMTC2           | 22.69069832 | -3.025156573     |                  | 0.643053579    |
| CCDC15          | 117.4520435 | -2.191581007     |                  | 0.473870515    |
| BTBD11          | 4106.259938 | -1.209910219     |                  | 0.262486171    |
| ACAD11          | 80.40516356 | -1.607374058     |                  | 0.35168805     |
| MIRLET7A1HG     | 55.49604042 | -1.958585669     |                  | 0.438749463    |
| XIST            | 84.00280918 | -1.606565396     |                  | 0.362228924    |
| GDPGP1          | 48.64559759 | -1.617133528     |                  | 0.368932422    |
| IPP             | 312.9802513 | -1.415906333     |                  | 0.326802337    |
| HNRNPA1P76      | 59.6185404  | -1.349659108     |                  | 0.312422035    |
| ZBED3           | 787.1263775 | -1.017816955     |                  | 0.238273422    |
| TMEM14B-DT      | 79.55171316 | -1.747622895     |                  | 0.412982776    |
| GUSBP9          | 24.57938736 | -1.577094986     |                  | 0.373288135    |
| BDNF-AS         | 175.6815437 | -1.65346794      |                  | 0.397510823    |
| ABCA5           | 355.7927685 | -1.108662145     |                  | 0.267355352    |
| ENSG00000174171 | 17.98967162 | -3.707121508     |                  | 0.899827977    |
| CATSPER2        | 58.13373901 | -1.400495954     |                  | 0.340770322    |
| ZNF623          | 527.1291737 | -1.003967276     |                  | 0.244605625    |
| AXL             | 564.6138811 | -1.420629199     |                  | 0.34642368     |
| PCBP3-AS1       | 84.48828465 | -3.079636106     |                  | 0.752888653    |
| LRRC19          | 21.94105553 | -2.967866881     |                  | 0.72604462     |
| ENSG00000279114 | 53.11982711 | -1.208707987     |                  | 0.296350424    |
| RHOQ            | 69.19078396 | -1.65226053      |                  | 0.405770144    |
| DNAJC27         | 309.3095016 | -1.151638268     |                  | 0.28449558     |
| ENSG00000288065 | 19.79398913 | -1.917486046     |                  | 0.47545869     |
| ENSG00000280388 | 70.25161008 | -1.952812409     |                  | 0.490623145    |
| TENT5C          | 519.2633254 | -1.624708901     |                  | 0.410697485    |
| DUSP10          | 1043.654585 | -1.251126613     |                  | 0.317876765    |
| CROCCP3         | 69.86967476 | -1.534125823     |                  | 0.390536851    |
| HERPUD2-AS1     | 172.6351822 | -1.833449891     |                  | 0.468964369    |
| ENSG00000272211 | 206.3859718 | -1.170802603     |                  | 0.300932473    |
| MYO1G           | 354.7600973 | -1.133349325     |                  | 0.294794933    |
| GK5             | 83.52087649 | -2.215788977     |                  | 0.580745831    |
| DUSP1           | 3916.144421 | -1.162328898     |                  | 0.306226061    |
| ZNF154          | 107.6238239 | -2.049715028     |                  | 0.540039474    |
| ENSG00000232611 | 105.3995042 | -1.31678843      |                  | 0.346969088    |
| CC2D2A          | 162.0762021 | -1.608826506     |                  | 0.424557284    |
| TPRG1           | 34.18169329 | -2.991348027     |                  | 0.791497931    |
| NSMCE1-DT       | 111.6459335 | -1.844393459     |                  | 0.491386924    |
| SULT1B1         | 366.2422212 | -1.534595296     |                  | 0.409440833    |
| SIDT1-AS1       | 24.88146579 | -1.497082835     |                  | 0.401031641    |
| CBY1            | 409.5293313 | -1.062097203     |                  | 0.285467002    |
| ENSG00000289523 | 26.77509723 | -1.268150346     |                  | 0.34175381     |
| ENSG00000265749 | 96.03608058 | -1.155762698     |                  | 0.311878825    |
| GTSE1-DT        | 43.14973007 | -3.203484021     |                  | 0.866506414    |

## E1\_mildcontrol\_down

|                 |             |              |             |
|-----------------|-------------|--------------|-------------|
| RBM33-DT        | 309.184913  | -1.192770413 | 0.323200958 |
| C13orf46        | 167.5686682 | -1.196279315 | 0.324905234 |
| PA2G4P4         | 89.79152128 | -1.302747756 | 0.354005646 |
| SNX18           | 118.6789883 | -1.58975927  | 0.432834555 |
| CCDC125         | 208.9217666 | -1.144010439 | 0.312473298 |
| RCAN3AS         | 30.90891611 | -1.391974797 | 0.381353883 |
| LINC01063       | 15.3861623  | -2.224814792 | 0.609987848 |
| ENSG00000240695 | 36.09474866 | -1.843076504 | 0.505311647 |
| ENSG00000253558 | 20.91975244 | -2.060587389 | 0.566535006 |
| ENSG00000260177 | 45.81262546 | -1.608748474 | 0.442950247 |
| EFHB            | 18.96141215 | -3.562299246 | 0.981226649 |
| TIGAR           | 168.964556  | -1.26537971  | 0.348844272 |
| ENSG00000279631 | 373.717343  | -1.484777873 | 0.411295661 |
| C2orf49-DT      | 77.64359947 | -1.896403868 | 0.526051858 |
| ENSG00000274979 | 144.7969237 | -1.725211711 | 0.481422202 |
| S100B           | 12.89903774 | -3.326393684 | 0.929138972 |
| ENSG00000289000 | 24.39026422 | -1.631006895 | 0.458629891 |
| TMEM117         | 134.9843959 | -1.411926264 | 0.398145769 |
| ENSG00000279557 | 15.1853242  | -2.19871521  | 0.620763513 |
| NIBAN1          | 436.9453754 | -1.202598473 | 0.342124654 |
| LINC01376       | 27.98308338 | -1.983487089 | 0.565283638 |
| MYH10           | 252.3890451 | -1.249261859 | 0.356844245 |
| PAK4            | 50.32955929 | -1.431267657 | 0.409318992 |
| ENSG00000265205 | 26.93561549 | -2.198523277 | 0.62889994  |
| ENSG00000290086 | 72.75570205 | -1.359219582 | 0.391761181 |
| MIR5091         | 37.67946903 | -1.288702442 | 0.372715082 |
| TMCO1-AS1       | 73.62374969 | -1.45644116  | 0.421396565 |
| ENSG00000288923 | 56.06973519 | -1.130034956 | 0.329720348 |
| ENSG00000228852 | 19.38930127 | -1.964896941 | 0.573504573 |
| PITPNM2         | 106.1192184 | -1.343127411 | 0.392213098 |
| ENSG00000286584 | 21.67605152 | -2.05899225  | 0.602505615 |
| MIR99AHG        | 212.6101268 | -1.459988415 | 0.427517584 |
| PDE5A           | 115.6347544 | -1.33592037  | 0.391328494 |
| ITGA10          | 31.98882325 | -2.633606003 | 0.77230132  |
| ENSG00000288819 | 21.47000577 | -2.905333474 | 0.852615038 |
| PDE7B           | 386.3593536 | -1.387766379 | 0.408727905 |
| ENSG00000175604 | 59.42364799 | -1.60838     | 0.474248951 |
| ENSG00000253539 | 16.58515614 | -2.961977118 | 0.874984388 |
| PLPPR2          | 61.23688518 | -1.812633268 | 0.536847827 |
| ENSG00000260279 | 187.0934399 | -1.254817479 | 0.371795135 |
| SIGLEC7         | 16.17043022 | -3.029006135 | 0.899898131 |
| RPL36A          | 62.91530375 | -1.499935011 | 0.445608151 |
| ENSG00000261242 | 39.16373262 | -1.643664797 | 0.488619565 |
| DNAI7           | 20.89470308 | -1.624118393 | 0.485634663 |
| ENSG00000249856 | 25.7852825  | -1.312796829 | 0.393770833 |
| ENSG00000179253 | 65.44925261 | -1.901477008 | 0.57068917  |
| ENSG00000274425 | 33.85860129 | -1.482354727 | 0.445698597 |
| CPPED1          | 289.3155984 | -1.567420961 | 0.471652325 |
| UVSSA           | 150.5684883 | -1.594932627 | 0.480479716 |
| ENSG00000260927 | 24.44453345 | -2.416139238 | 0.728995708 |
| ENSG00000285651 | 125.5675887 | -1.79753463  | 0.542514706 |
| IL18R1          | 1039.341095 | -1.231679882 | 0.372166104 |
| DTNB-AS1        | 12.21220484 | -2.145866212 | 0.648463737 |

## E1\_mildcontrol\_down

|                 |             |              |             |
|-----------------|-------------|--------------|-------------|
| CAPS            | 114.5935493 | -1.022819383 | 0.309202631 |
| NEU3            | 181.8167467 | -1.667132084 | 0.505264543 |
| FAHD2B          | 264.6212614 | -1.725826691 | 0.524253599 |
| HIP1            | 49.25305042 | -1.806977825 | 0.548991313 |
| FITM2           | 213.8047886 | -1.253427069 | 0.381010239 |
| SETD6           | 228.1514977 | -1.405380637 | 0.427488155 |
| DNAAF10         | 116.7466401 | -1.262012358 | 0.383952091 |
| ADGRF3          | 22.33209137 | -1.856197839 | 0.565579718 |
| TXLNB           | 33.73176843 | -3.432115754 | 1.046506479 |
| ENSG00000264829 | 12.09837679 | -2.018269504 | 0.615714578 |
| ENSG00000261872 | 17.56593851 | -1.547770584 | 0.473322248 |
| ENSG00000286865 | 28.89095959 | -1.356521585 | 0.414811685 |
| APOBR           | 28.06584414 | -2.279801249 | 0.698202458 |
| RSPH3           | 168.5486433 | -1.122720396 | 0.345096464 |
| TM6SF1          | 26.68587942 | -2.633469376 | 0.813164024 |
| USP34-DT        | 422.3033877 | -1.120394801 | 0.346621007 |
| MTBP            | 323.6184359 | -1.164618556 | 0.361013436 |
| ZNF233          | 62.92777479 | -1.882991822 | 0.586771101 |
| CDT1            | 17.86692479 | -2.584844355 | 0.80527248  |
| DHX33           | 83.66848289 | -1.477612763 | 0.461403653 |
| KRT18P61        | 70.28475135 | -1.449900969 | 0.453553192 |
| MCTP2           | 318.7129743 | -1.036304766 | 0.325360064 |
| NCF1            | 110.1353546 | -1.621478845 | 0.509522443 |
| ENSG00000235111 | 39.87845474 | -2.311412809 | 0.726454783 |
| ENSG00000244712 | 25.42690183 | -2.295330862 | 0.722234332 |
| TRPC1           | 74.27856959 | -1.902884835 | 0.600159192 |
| ENSG00000269243 | 65.89484052 | -1.622820418 | 0.511751766 |
| ZNF417          | 334.8687192 | -1.184484289 | 0.373905708 |
| ENSG00000228327 | 26.4679559  | -1.079581159 | 0.340813392 |
| ENSG00000262777 | 15.84724278 | -1.290894809 | 0.408157355 |
| SLC9B1          | 58.36483118 | -1.462107848 | 0.463078825 |
| SUSD1           | 26.60801934 | -3.039964882 | 0.963454496 |
| RN7SKP110       | 49.22913792 | -1.310040308 | 0.415444022 |
| ZBTB34          | 93.60497286 | -1.704692856 | 0.541037066 |
| ENSG00000273729 | 79.87916808 | -1.318681322 | 0.419369375 |
| ENSG00000268912 | 18.06490093 | -2.516330564 | 0.801298805 |
| SLC24A1         | 59.77885563 | -2.140689721 | 0.681756196 |
| ENSG00000237798 | 18.19782461 | -1.95297677  | 0.622300088 |
| ENSG00000287387 | 93.44106036 | -1.081273973 | 0.344635004 |
| DICER1-AS1      | 23.0715891  | -1.763447852 | 0.563388218 |
| DCUN1D3         | 83.86139041 | -1.892407637 | 0.604744714 |
| GEN1            | 121.7391073 | -2.23598873  | 0.716354833 |
| ENSG00000286153 | 85.28479148 | -1.252441218 | 0.402814432 |
| ENSG00000239763 | 39.31134256 | -1.476060411 | 0.474919061 |
| BTBD8           | 223.9136006 | -1.388122678 | 0.446980206 |
| ITPR1-DT        | 121.6082977 | -1.320239701 | 0.42568611  |
| PAN3-AS1        | 172.0318923 | -1.317073499 | 0.424746362 |
| SPRYD4          | 196.517683  | -1.420435197 | 0.458413056 |
| RHBDF2          | 786.1575035 | -1.238278724 | 0.401008101 |
| FAM13A-AS1      | 35.23602215 | -1.634348338 | 0.530104006 |
| CHRM3           | 67.69198568 | -1.460429237 | 0.474327727 |
| ENSG00000261324 | 66.9674147  | -1.372124762 | 0.445903831 |
| FOS             | 1256.46621  | -1.670364077 | 0.543546364 |

## E1\_mildcontrol\_down

|                 |             |              |             |
|-----------------|-------------|--------------|-------------|
| ENSG00000271771 | 20.30206911 | -1.831651707 | 0.596517097 |
| FER             | 459.7497453 | -1.076736861 | 0.351205441 |
| COP1-DT         | 25.82050874 | -1.928056665 | 0.628961477 |
| UBOX5-AS1       | 25.91096094 | -1.414058978 | 0.461765592 |
| DDN-AS1         | 118.1639963 | -1.071952595 | 0.350426381 |
| ENSG00000273437 | 26.61483858 | -1.313232993 | 0.429347552 |
| PTTG2           | 20.18065499 | -2.038747587 | 0.666674951 |
| RERE-AS1        | 31.44762198 | -1.351584535 | 0.442518351 |
| ENSG00000269737 | 26.83570707 | -1.793396379 | 0.588870017 |
| H2BC6           | 17.92364537 | -1.896798362 | 0.623127096 |
| ITGB5           | 43.12548471 | -3.087775307 | 1.015087157 |
| PRR34-AS1       | 21.83274435 | -1.107152418 | 0.363942207 |
| CCDC183-AS1     | 13.69381771 | -2.161972884 | 0.711065757 |
| RNU6-1153P      | 38.73461948 | -1.270640673 | 0.417968262 |
| ENSG00000290015 | 81.74077973 | -1.012995241 | 0.333453631 |
| Y_RNA           | 9.229875691 | -1.625305817 | 0.535102019 |
| AMDHD2          | 193.8317851 | -1.103485389 | 0.363595153 |
| ENSG00000280160 | 81.7972431  | -1.088564078 | 0.359108703 |
| ENSG00000235785 | 119.7821575 | -1.009533291 | 0.333732328 |
| ENSG00000273456 | 117.2876649 | -1.115871039 | 0.369163873 |
| INSYN2B         | 19.80132395 | -2.314306329 | 0.767165488 |
| C5orf58         | 19.38145788 | -2.656668553 | 0.881420681 |
| ENSG00000276853 | 18.79338675 | -2.158029752 | 0.715977935 |
| ENSG00000275910 | 33.06523408 | -1.131693686 | 0.375860229 |
| ENSG00000258526 | 23.07381422 | -1.990075265 | 0.662034648 |
| DNM1P46         | 24.68880118 | -1.18413995  | 0.394256424 |
| YBX1P4          | 20.98365964 | -2.110633184 | 0.702960071 |
| ENSG00000255321 | 26.70536582 | -1.413088247 | 0.470891385 |
| RNVU1-15        | 36.87395477 | -1.601643023 | 0.53427026  |
| ENSG00000286535 | 37.93401549 | -2.541923946 | 0.85029245  |
| ENSG00000259950 | 21.19322024 | -2.410428828 | 0.807334315 |
| RIPOR3          | 152.6025381 | -1.198745857 | 0.404742052 |
| FRMD4A          | 72.14647273 | -1.39082255  | 0.469903891 |
| IFT172          | 233.5220513 | -1.022729392 | 0.346795738 |
| LANCL1-AS1      | 10.78212572 | -2.520085885 | 0.854431333 |
| RNU6-790P       | 17.33816958 | -1.705057861 | 0.578683695 |
| SPDYE12         | 23.60122011 | -1.432842326 | 0.486881786 |
| PPOX            | 300.8410103 | -1.144711192 | 0.389356536 |
| EGR1            | 58.86430038 | -2.246595573 | 0.764956929 |
| ENSG00000259201 | 21.11049203 | -1.244013262 | 0.423573476 |
| DENND2C         | 72.82207084 | -2.384354129 | 0.812848671 |
| TMPRSS6         | 30.17121754 | -2.478201694 | 0.846166924 |
| RABGAP1L-IT1    | 18.49730966 | -1.512096172 | 0.517789661 |
| ZNF567-DT       | 233.1658498 | -1.374711878 | 0.47309237  |
| ENSG00000289440 | 18.81941786 | -2.516507626 | 0.866224264 |
| ENSG00000269867 | 18.11180178 | -1.653690111 | 0.570394503 |
| CHROMR          | 260.4766363 | -1.086589514 | 0.375658049 |
| MANSC1          | 77.46193462 | -2.356409138 | 0.816644857 |
| MAP7D2          | 55.07202213 | -1.771687539 | 0.613943214 |
| FPGT            | 457.8068923 | -1.184510752 | 0.410593656 |
| ENSG00000267277 | 31.21149266 | -1.566886008 | 0.543546875 |
| SEPTIN7-DT      | 181.9000987 | -1.256639718 | 0.436839777 |
| HIVEP3          | 195.9457496 | -1.133233594 | 0.394389708 |

## E1\_mildcontrol\_down

|                 |             |              |             |
|-----------------|-------------|--------------|-------------|
| BCL7A           | 76.01714352 | -1.206164714 | 0.420210295 |
| LINC00471       | 34.46741965 | -1.833944131 | 0.63913455  |
| ENSG00000274667 | 91.42192306 | -1.213244898 | 0.423216555 |
| ENSG00000226266 | 61.6474232  | -1.621736057 | 0.56616837  |
| CCDC61          | 353.0504181 | -1.131087147 | 0.394954576 |
| ENSG00000226117 | 34.53051158 | -1.221648762 | 0.428291465 |
| EPB41L3         | 375.8100222 | -1.023180181 | 0.359134136 |
| SOCS3           | 2542.83279  | -1.037318558 | 0.36409829  |
| MBOAT2          | 77.22063791 | -2.67008023  | 0.941379551 |
| LINC00539       | 22.69044626 | -2.20008652  | 0.776613745 |
| GALK1           | 220.1794655 | -1.290892135 | 0.458556086 |
| ARHGAP18        | 123.9385304 | -1.42586819  | 0.506725641 |

## E1\_mildcontrol\_down

| Test Statistic Value | p            | Adjusted P value |
|----------------------|--------------|------------------|
| -6.467736385         | 9.95E-11     | 0.000000178      |
| -5.602731081         | 0.0000000211 | 0.0000107        |
| -5.450193957         | 0.0000000503 | 0.0000225        |
| -5.292095798         | 0.000000121  | 0.0000437        |
| -5.229186547         | 0.00000017   | 0.0000541        |
| -4.985095299         | 0.000000619  | 0.000125316      |
| -4.939270336         | 0.000000784  | 0.000152568      |
| -4.7063238           | 0.00000252   | 0.000338739      |
| -4.704361615         | 0.00000255   | 0.000339013      |
| -4.624852021         | 0.00000375   | 0.00044795       |
| -4.609424617         | 0.00000404   | 0.000478737      |
| -4.570454007         | 0.00000487   | 0.000547088      |
| -4.464018383         | 0.00000804   | 0.00077512       |
| -4.435221181         | 0.0000092    | 0.000840877      |
| -4.383278431         | 0.0000117    | 0.000991158      |
| -4.332607735         | 0.0000147    | 0.001112556      |
| -4.319986935         | 0.0000156    | 0.001149534      |
| -4.271634435         | 0.0000194    | 0.001344673      |
| -4.231708913         | 0.0000232    | 0.001491379      |
| -4.224873057         | 0.0000239    | 0.001518079      |
| -4.159554515         | 0.0000319    | 0.001890295      |
| -4.146773708         | 0.0000337    | 0.001975769      |
| -4.119811343         | 0.0000379    | 0.002162835      |
| -4.109794385         | 0.0000396    | 0.002225299      |
| -4.104432498         | 0.0000405    | 0.002261384      |
| -4.100843214         | 0.0000412    | 0.002279986      |
| -4.090427041         | 0.0000431    | 0.002356818      |
| -4.08771968          | 0.0000436    | 0.002358328      |
| -4.078644359         | 0.0000453    | 0.002437797      |
| -4.07191252          | 0.0000466    | 0.002456782      |
| -4.04800056          | 0.0000517    | 0.002619749      |
| -4.032918291         | 0.0000551    | 0.002714358      |
| -3.980269644         | 0.0000688    | 0.003219941      |
| -3.955974795         | 0.0000762    | 0.003432532      |
| -3.935885697         | 0.0000829    | 0.003646217      |
| -3.92824856          | 0.0000856    | 0.003731497      |
| -3.909571837         | 0.0000925    | 0.003912107      |
| -3.890582464         | 0.00010004   | 0.004068791      |
| -3.844534617         | 0.000120781  | 0.004628735      |
| -3.815419515         | 0.000135952  | 0.00489042       |
| -3.795656369         | 0.000147253  | 0.005089948      |
| -3.79549112          | 0.000147351  | 0.005089948      |
| -3.795117417         | 0.000147574  | 0.005089948      |
| -3.789421516         | 0.000150999  | 0.005196266      |
| -3.779350406         | 0.000157238  | 0.005338354      |
| -3.753444319         | 0.000174421  | 0.005738379      |
| -3.748026998         | 0.000178231  | 0.005779561      |
| -3.733079096         | 0.000189153  | 0.005943247      |
| -3.720560327         | 0.000198781  | 0.006131513      |
| -3.710713122         | 0.000206676  | 0.006285608      |
| -3.705806888         | 0.000210719  | 0.006357592      |
| -3.69701132          | 0.000218153  | 0.006493469      |

## E1\_mildcontrol\_down

|              |             |             |
|--------------|-------------|-------------|
| -3.690491582 | 0.000223821 | 0.006577059 |
| -3.68193304  | 0.000231472 | 0.006685351 |
| -3.680019711 | 0.000233216 | 0.006715911 |
| -3.672902852 | 0.000239811 | 0.006815294 |
| -3.661146234 | 0.000251089 | 0.007056542 |
| -3.650086856 | 0.000262152 | 0.007273151 |
| -3.647310022 | 0.000265    | 0.007314853 |
| -3.647405548 | 0.000264902 | 0.007314853 |
| -3.637175756 | 0.000275644 | 0.007510182 |
| -3.631894296 | 0.000281348 | 0.007624541 |
| -3.630455055 | 0.000282922 | 0.0076399   |
| -3.62734839  | 0.000286347 | 0.007667011 |
| -3.610001306 | 0.000306195 | 0.008020744 |
| -3.604975136 | 0.000312183 | 0.008112477 |
| -3.583573221 | 0.000338926 | 0.008659152 |
| -3.580081971 | 0.000343486 | 0.008704213 |
| -3.556259477 | 0.000376173 | 0.009158819 |
| -3.546254595 | 0.000390748 | 0.009426926 |
| -3.541953038 | 0.000397176 | 0.009522189 |
| -3.515088611 | 0.000439607 | 0.010380085 |
| -3.508835134 | 0.000450074 | 0.010459908 |
| -3.500860323 | 0.000463759 | 0.010680274 |
| -3.496704732 | 0.000471043 | 0.010765884 |
| -3.49582364  | 0.000472601 | 0.010770702 |
| -3.469510629 | 0.000521407 | 0.011670913 |
| -3.457607443 | 0.000544995 | 0.012069833 |
| -3.456224567 | 0.000547799 | 0.01210101  |
| -3.427252714 | 0.000609721 | 0.012995971 |
| -3.426122536 | 0.000612264 | 0.013031865 |
| -3.424483827 | 0.000615969 | 0.013088658 |
| -3.417382676 | 0.000632263 | 0.013284486 |
| -3.415037113 | 0.000637733 | 0.013346083 |
| -3.413808063 | 0.000640617 | 0.013354398 |
| -3.410075747 | 0.000649448 | 0.013501409 |
| -3.407555983 | 0.000655475 | 0.013570918 |
| -3.395330637 | 0.000685458 | 0.014046009 |
| -3.391425528 | 0.000695301 | 0.014106793 |
| -3.385177104 | 0.000711323 | 0.01433135  |
| -3.376437749 | 0.00073431  | 0.014603741 |
| -3.375023932 | 0.000738093 | 0.014617255 |
| -3.365943356 | 0.000762824 | 0.014952415 |
| -3.366040338 | 0.000762556 | 0.014952415 |
| -3.363894768 | 0.000768508 | 0.014952415 |
| -3.344321392 | 0.000824841 | 0.015666821 |
| -3.33391079  | 0.000856341 | 0.016103883 |
| -3.331896078 | 0.000862565 | 0.016140913 |
| -3.325912935 | 0.000881295 | 0.016370288 |
| -3.323255026 | 0.000889735 | 0.016466614 |
| -3.319458814 | 0.000901921 | 0.016651526 |
| -3.314339454 | 0.000918599 | 0.016856905 |
| -3.313338069 | 0.000921895 | 0.016868692 |
| -3.309489683 | 0.000934662 | 0.01702813  |
| -3.309153758 | 0.000935784 | 0.017028133 |

## E1\_mildcontrol\_down

|              |             |             |
|--------------|-------------|-------------|
| -3.307925868 | 0.000939897 | 0.017041666 |
| -3.299523206 | 0.000968492 | 0.017250983 |
| -3.291969181 | 0.000994885 | 0.017617709 |
| -3.291450667 | 0.000996721 | 0.017629647 |
| -3.28974642  | 0.001002777 | 0.017674965 |
| -3.287531173 | 0.001010107 | 0.017773329 |
| -3.286900596 | 0.001012966 | 0.017792557 |
| -3.281938476 | 0.001030961 | 0.017983751 |
| -3.279593411 | 0.001039568 | 0.018048511 |
| -3.277930351 | 0.001045712 | 0.018110208 |
| -3.270014439 | 0.00107542  | 0.018492513 |
| -3.270210636 | 0.001074674 | 0.018492513 |
| -3.265243803 | 0.001093699 | 0.018722554 |
| -3.253352365 | 0.00114052  | 0.019317553 |
| -3.238546345 | 0.001201405 | 0.019994164 |
| -3.232333813 | 0.001227835 | 0.020275983 |
| -3.225970119 | 0.001255465 | 0.020597764 |
| -3.209073893 | 0.001331633 | 0.02145449  |
| -3.209900274 | 0.00132781  | 0.02145449  |
| -3.202429698 | 0.001362736 | 0.021769342 |
| -3.19676059  | 0.001389802 | 0.022085486 |
| -3.185101307 | 0.001447033 | 0.02263936  |
| -3.182350193 | 0.001460851 | 0.022785067 |
| -3.181771067 | 0.001463775 | 0.022807233 |
| -3.178097138 | 0.001482451 | 0.023003755 |
| -3.170633494 | 0.001521069 | 0.023294018 |
| -3.171108584 | 0.001518584 | 0.023294018 |
| -3.167868964 | 0.001535607 | 0.023438272 |
| -3.167660616 | 0.001536708 | 0.023438272 |
| -3.162738078 | 0.001562929 | 0.023723869 |
| -3.157362781 | 0.001592031 | 0.023961182 |
| -3.155276033 | 0.001603463 | 0.024045611 |
| -3.153349765 | 0.001614083 | 0.024133322 |
| -3.150787561 | 0.001628309 | 0.024311776 |
| -3.144438771 | 0.001664057 | 0.024661849 |
| -3.140314884 | 0.001687663 | 0.024914375 |
| -3.139963718 | 0.001689688 | 0.024920018 |
| -3.138319933 | 0.001699193 | 0.025011594 |
| -3.137446753 | 0.001704262 | 0.025037642 |
| -3.130075846 | 0.001747612 | 0.025428337 |
| -3.129266936 | 0.00175243  | 0.025449648 |
| -3.121342424 | 0.001800286 | 0.02584781  |
| -3.109226282 | 0.00187578  | 0.026631875 |
| -3.108025201 | 0.00188342  | 0.026663044 |
| -3.105557385 | 0.001899208 | 0.026836476 |
| -3.101439464 | 0.001925822 | 0.027111578 |
| -3.100847036 | 0.001929679 | 0.0271407   |
| -3.098592368 | 0.001944423 | 0.027272246 |
| -3.08791449  | 0.002015665 | 0.028167335 |
| -3.083071092 | 0.002048762 | 0.028577218 |
| -3.078945535 | 0.002077347 | 0.028738205 |
| -3.077176437 | 0.002089716 | 0.0288552   |
| -3.073084812 | 0.002118583 | 0.029122836 |

## E1\_mildcontrol\_down

|              |             |             |
|--------------|-------------|-------------|
| -3.070577047 | 0.002136456 | 0.029288934 |
| -3.065831946 | 0.002170653 | 0.029621032 |
| -3.065460661 | 0.00217335  | 0.029621032 |
| -3.062287451 | 0.002196524 | 0.029816144 |
| -3.058995137 | 0.002220808 | 0.030065098 |
| -3.058671204 | 0.00222321  | 0.030070799 |
| -3.058083378 | 0.002227576 | 0.03010302  |
| -3.054301662 | 0.002255851 | 0.030284618 |
| -3.045487675 | 0.002323033 | 0.030816738 |
| -3.043999168 | 0.002334558 | 0.030888623 |
| -3.041881958 | 0.002351041 | 0.030998605 |
| -3.042110524 | 0.002349256 | 0.030998605 |
| -3.040468289 | 0.002362106 | 0.031080699 |
| -3.040041045 | 0.002365459 | 0.031080699 |
| -3.037889367 | 0.002382414 | 0.031222379 |
| -3.037375603 | 0.002386479 | 0.031248665 |
| -3.034928766 | 0.002405925 | 0.031421961 |
| -3.031294062 | 0.00243508  | 0.031722668 |
| -3.024979017 | 0.002486504 | 0.031924857 |
| -3.022698377 | 0.002505318 | 0.032084986 |
| -3.016697653 | 0.002555446 | 0.03258749  |
| -3.014075585 | 0.002577636 | 0.032707526 |
| -3.014100919 | 0.002577421 | 0.032707526 |
| -3.010942898 | 0.002604378 | 0.032964174 |
| -3.005998662 | 0.002647102 | 0.033227803 |
| -3.003476611 | 0.002669141 | 0.033403695 |
| -3.0024937   | 0.002677775 | 0.033474395 |
| -3.000879379 | 0.002692012 | 0.033541848 |
| -2.997814295 | 0.002719233 | 0.033720787 |
| -2.989470209 | 0.002794617 | 0.034396681 |
| -2.985663788 | 0.002829636 | 0.034665754 |
| -2.961752679 | 0.003058934 | 0.036549027 |
| -2.959802158 | 0.003078367 | 0.036669774 |
| -2.949082934 | 0.003187184 | 0.037554605 |
| -2.94943056  | 0.003183601 | 0.037554605 |
| -2.946441856 | 0.003214528 | 0.037816809 |
| -2.942895721 | 0.003251579 | 0.038046235 |
| -2.940007642 | 0.003282042 | 0.038228263 |
| -2.936891593 | 0.0033152   | 0.038405703 |
| -2.936947972 | 0.003314597 | 0.038405703 |
| -2.933330906 | 0.003353463 | 0.038642483 |
| -2.928738553 | 0.003403406 | 0.039036975 |
| -2.920290391 | 0.003497054 | 0.039843307 |
| -2.905800143 | 0.003663153 | 0.04117505  |
| -2.905145619 | 0.003670823 | 0.041204442 |
| -2.899204151 | 0.003741112 | 0.041790396 |
| -2.892496292 | 0.003821937 | 0.042435475 |
| -2.885476004 | 0.003908223 | 0.043051393 |
| -2.885751483 | 0.003904804 | 0.043051393 |
| -2.884873484 | 0.00391571  | 0.043092685 |
| -2.882706313 | 0.003942748 | 0.043228241 |
| -2.876660472 | 0.004019078 | 0.043663595 |
| -2.873385312 | 0.004060985 | 0.043926948 |

E1\_mildcontrol\_down

|              |             |             |
|--------------|-------------|-------------|
| -2.870383537 | 0.004099742 | 0.044188695 |
| -2.869417922 | 0.00411228  | 0.044229602 |
| -2.866723631 | 0.00414745  | 0.044450356 |
| -2.864405967 | 0.004177922 | 0.044745336 |
| -2.863841097 | 0.004185379 | 0.044762025 |
| -2.852377091 | 0.004339359 | 0.045987508 |
| -2.849019568 | 0.004385418 | 0.046348015 |
| -2.849006944 | 0.004385592 | 0.046348015 |
| -2.836348236 | 0.004563266 | 0.047563273 |
| -2.832922457 | 0.004612457 | 0.047977144 |
| -2.815123767 | 0.004875845 | 0.049828839 |
| -2.813886008 | 0.004894658 | 0.04992025  |

## E2\_mildcontrol\_up

| Gene Symbol | baseMean    | Log2 Fold Change | Log2 Fold Change | Standard Error |
|-------------|-------------|------------------|------------------|----------------|
| ARSD        | 13.83891928 | 3.243116962      |                  | 1.090822202    |
| ADIPOR2     | 119.7512585 | 1.158356295      |                  | 0.31673821     |
| MARK4       | 83.50453188 | 1.095683253      |                  | 0.35755148     |
| CEACAM21    | 1752.173531 | 1.102784313      |                  | 0.209786711    |
| ADAM22      | 78.23976552 | 2.759568253      |                  | 0.7184298      |
| LDAF1       | 361.0042195 | 1.007697328      |                  | 0.274089311    |
| WWTR1       | 17.43987769 | 1.572460803      |                  | 0.484566672    |
| PLEKHA5     | 104.1582868 | 1.417867585      |                  | 0.489070861    |
| PHPT1       | 182.9295332 | 1.147920945      |                  | 0.312917403    |
| RELT        | 129.1337793 | 1.491181031      |                  | 0.381456748    |
| QSER1       | 129.1133115 | 1.856217691      |                  | 0.492102927    |
| FAR2        | 98.50035616 | 1.754761287      |                  | 0.501116538    |
| UHRF1BP1    | 165.1953944 | 1.11098083       |                  | 0.343680581    |
| PDIA5       | 68.41733153 | 1.944729383      |                  | 0.622701501    |
| TLE2        | 613.8997358 | 1.078895634      |                  | 0.241570779    |
| TBC1D1      | 669.17164   | 1.019350353      |                  | 0.20073318     |
| STAG3       | 95.13664112 | 1.639172212      |                  | 0.430919769    |
| NEO1        | 143.9796175 | 1.558557616      |                  | 0.520976815    |
| PFN2        | 158.6833061 | 1.175327488      |                  | 0.269480638    |
| PPP2R3A     | 104.2392844 | 1.166449909      |                  | 0.391158641    |
| GRAMD4      | 124.2076315 | 3.055884834      |                  | 0.499857975    |
| PTPN23      | 203.1733743 | 1.022024349      |                  | 0.333414787    |
| STXBP2      | 238.3035346 | 1.756005217      |                  | 0.485149902    |
| CEACAM1     | 108.8392111 | 2.028141494      |                  | 0.551852083    |
| CIC         | 105.999898  | 1.517668898      |                  | 0.388898529    |
| PAFAH1B3    | 254.0344253 | 1.145544289      |                  | 0.299404478    |
| EXD2        | 484.8673517 | 1.082583711      |                  | 0.227371739    |
| BCORL1      | 79.24599363 | 1.977820739      |                  | 0.614227094    |
| NID2        | 43.03005676 | 2.854291278      |                  | 0.784673223    |
| TPX2        | 25.40322358 | 5.907902104      |                  | 1.351264382    |
| LAG3        | 216.5445715 | 1.581092914      |                  | 0.413440422    |
| PCBP4       | 187.7225294 | 1.15762835       |                  | 0.317793962    |
| SETD1A      | 91.96705022 | 1.828427165      |                  | 0.441594339    |
| DDTL        | 16.94628919 | 1.813007364      |                  | 0.443585174    |
| MICALL1     | 197.6220441 | 1.235943426      |                  | 0.295669774    |
| RBFOX2      | 23.29763847 | 6.867134         |                  | 1.145446579    |
| SGSM3       | 19.62789277 | 1.564042139      |                  | 0.401958384    |
| TRIB3       | 714.8204878 | 1.028251256      |                  | 0.244110308    |
| MROH8       | 45.26825927 | 2.367541031      |                  | 0.806769257    |
| CHMP4B      | 54.87653592 | 1.488394652      |                  | 0.406999219    |
| PLA2G15     | 473.0203622 | 2.368650842      |                  | 0.478276301    |
| HAGHL       | 111.7729939 | 1.169713302      |                  | 0.371514528    |
| FBXO31      | 1666.855703 | 1.062614836      |                  | 0.151317043    |
| CTSH        | 193.5690007 | 1.09763828       |                  | 0.269543641    |
| NUMBL       | 46.65002993 | 1.599848009      |                  | 0.432987542    |
| BBC3        | 245.8796929 | 1.188900717      |                  | 0.316336496    |
| LFNG        | 57.95963096 | 2.547982305      |                  | 0.547909474    |
| AEBP1       | 345.7485598 | 1.23547248       |                  | 0.297719922    |
| DNTT        | 94.73071736 | 4.771695949      |                  | 0.927408506    |
| NPM3        | 17.75142657 | 2.309637927      |                  | 0.653037411    |
| PSMD9       | 420.0543128 | 1.140594989      |                  | 0.232449058    |
| PPFIBP1     | 52.78606744 | 2.068554014      |                  | 0.640741582    |

## E2\_mildcontrol\_up

|          |             |             |             |
|----------|-------------|-------------|-------------|
| CORO1C   | 252.314683  | 1.696998899 | 0.430898969 |
| STX2     | 138.3010029 | 1.926800565 | 0.535771476 |
| FBXO5    | 888.8849578 | 1.221662162 | 0.279177818 |
| EPM2A    | 276.8626909 | 1.564313704 | 0.412159005 |
| ACVR1    | 642.0159548 | 1.804207248 | 0.33652849  |
| TAF1B    | 265.5388833 | 1.713526128 | 0.323044932 |
| DHCR24   | 353.3147724 | 2.651370031 | 0.40229767  |
| HDAC1    | 1893.398295 | 1.144110305 | 0.298904785 |
| KIF21B   | 563.3967603 | 1.038161173 | 0.300501293 |
| ELOVL4   | 151.4725907 | 3.448680646 | 0.815432882 |
| IFI27L2  | 203.8548082 | 1.003397627 | 0.272172323 |
| ARAP3    | 34.25967777 | 3.37404015  | 0.673308091 |
| HVCN1    | 217.7549739 | 1.903743817 | 0.385189998 |
| SPRYD7   | 168.9330387 | 1.099239721 | 0.241024397 |
| NLN      | 105.3215884 | 3.242000649 | 1.012772088 |
| AMOT     | 24.01135766 | 3.151269278 | 1.081609196 |
| PRRG2    | 18.63178467 | 5.806658536 | 0.981229076 |
| IFI6     | 696.5677477 | 1.691816948 | 0.525752769 |
| ZC4H2    | 536.7497053 | 1.049921708 | 0.294293501 |
| YWHAH    | 804.3546781 | 1.13243075  | 0.219973669 |
| IQCIN    | 32.13413891 | 2.227929698 | 0.732844505 |
| SAMD10   | 274.5304347 | 1.103016019 | 0.327873674 |
| GFPT2    | 22.03410389 | 5.396915949 | 1.280021666 |
| BTBD3    | 71.52171019 | 4.484948095 | 0.974049683 |
| DPH2     | 1045.322747 | 1.05209981  | 0.180004529 |
| RNF122   | 17.28245569 | 3.745600392 | 0.776031162 |
| CD101    | 205.277317  | 1.82539201  | 0.577674195 |
| CDCA8    | 142.3561227 | 1.698430937 | 0.593787907 |
| OASL     | 1082.449113 | 1.128758279 | 0.384914298 |
| TEC      | 140.0460293 | 2.428409355 | 0.61976448  |
| TTYH3    | 41.66319671 | 2.057634189 | 0.435190416 |
| CIB2     | 21.25544623 | 3.633892256 | 0.961005934 |
| CENPO    | 51.61937289 | 2.372697056 | 0.689835359 |
| SHF      | 102.4485683 | 1.849545379 | 0.376872572 |
| CCNG2    | 678.2792659 | 1.057257398 | 0.174705146 |
| PEX5     | 322.0550084 | 1.30859882  | 0.366582143 |
| TGFB1I1  | 12.69951475 | 6.346895951 | 1.080153011 |
| GALNS    | 113.1604438 | 1.953834579 | 0.645225515 |
| SAMD1    | 198.4382479 | 1.052486453 | 0.285305262 |
| PRDM15   | 211.4590732 | 2.077738747 | 0.527994842 |
| HSPG2    | 53.28000988 | 2.173947842 | 0.680598704 |
| MOB3C    | 1133.853851 | 1.252661226 | 0.325282754 |
| ATP8B2   | 188.333001  | 1.569982868 | 0.414855254 |
| MAP3K21  | 23.20150841 | 3.240857529 | 1.140725802 |
| CAND2    | 75.18025678 | 2.141875816 | 0.695527722 |
| CCDC120  | 57.67505269 | 1.936541365 | 0.597972462 |
| TNKS1BP1 | 162.0698895 | 1.362821756 | 0.435924425 |
| DHX37    | 192.2930176 | 1.525142289 | 0.408294586 |
| PLBD2    | 162.8708459 | 1.114047727 | 0.336937082 |
| SLC2A13  | 442.9445508 | 1.263132047 | 0.33136214  |
| ARL11    | 133.2770147 | 1.983144688 | 0.627810614 |
| CEP112   | 83.4766818  | 2.554218253 | 0.819671145 |
| SLFN13   | 190.3331294 | 1.319453042 | 0.442669375 |

## E2\_mildcontrol\_up

|           |             |             |             |
|-----------|-------------|-------------|-------------|
| RAB6B     | 71.29570567 | 3.292126586 | 0.761695535 |
| GOLGA7B   | 26.55121116 | 2.13784661  | 0.727744644 |
| TMEM237   | 100.5768782 | 2.145291517 | 0.532627724 |
| CFAP418   | 101.2403423 | 2.870667617 | 0.891729658 |
| CDK20     | 196.8558075 | 1.930893905 | 0.460561724 |
| F11R      | 565.1268567 | 1.266419064 | 0.256658667 |
| PDE9A     | 257.8771591 | 1.132107234 | 0.312706383 |
| NLRX1     | 316.3580326 | 1.241062027 | 0.347760546 |
| FAM189B   | 146.1944317 | 1.495777328 | 0.349064346 |
| NACC1     | 25.00797092 | 2.171660967 | 0.746614405 |
| TBC1D24   | 51.87092973 | 1.937862252 | 0.59128218  |
| SANBR     | 61.99380005 | 2.560723917 | 0.837944217 |
| MEMO1     | 200.3500416 | 1.052614875 | 0.365225481 |
| EIF5A2    | 254.9960094 | 1.899530796 | 0.59399066  |
| PLSCR2    | 24.74749386 | 1.930523513 | 0.600575269 |
| LZTFL1    | 442.9774787 | 1.125572497 | 0.258081007 |
| CCDC51    | 395.822161  | 1.030807442 | 0.240420004 |
| PHKG1     | 108.9083258 | 1.350326978 | 0.474642394 |
| CDK5      | 192.5320509 | 1.339745798 | 0.331135602 |
| SLC4A2    | 449.9732636 | 1.17626704  | 0.342524444 |
| DACT1     | 556.2061718 | 1.167022686 | 0.344516439 |
| COMTD1    | 67.25441793 | 1.024740178 | 0.363770743 |
| GPT2      | 95.74522339 | 2.873404611 | 0.869860684 |
| ZCCHC18   | 22.18874222 | 3.182198613 | 1.089454612 |
| MAP1A     | 81.04323968 | 2.218782154 | 0.666540238 |
| ENGASE    | 272.0166291 | 1.235703196 | 0.266120459 |
| UBXN6     | 127.0316182 | 1.199004363 | 0.296842701 |
| TOX-DT    | 30.87410316 | 2.726261209 | 0.859957657 |
| VPS37C    | 48.28112333 | 1.449335365 | 0.474599397 |
| SPINDOC   | 13.65163421 | 2.671357863 | 0.751384314 |
| SAC3D1    | 337.6810818 | 1.134211055 | 0.254843891 |
| ADAM9     | 32.73519616 | 4.60629897  | 1.065810344 |
| LGALS9    | 92.6500076  | 1.787930954 | 0.480131818 |
| E2F6      | 413.8486203 | 1.132366888 | 0.234686984 |
| EFNA1     | 1309.595568 | 1.026017491 | 0.302265785 |
| CXCL10    | 227.2103408 | 5.996700729 | 1.344508852 |
| DPY19L2P2 | 25.73379012 | 2.338442501 | 0.79433944  |
| GAA       | 281.2855775 | 1.745925771 | 0.400720699 |
| HOPX      | 116.5044264 | 1.050321174 | 0.357084319 |
| RSPH9     | 59.57246113 | 1.735157614 | 0.428872959 |
| DAG1      | 168.1834007 | 1.179679995 | 0.351292104 |
| PPP1R14B  | 610.6849229 | 1.144056999 | 0.345537141 |
| PC        | 169.0202817 | 2.370647705 | 0.557787517 |
| CCDC14    | 344.6502136 | 1.019301405 | 0.2810119   |
| ZNF683    | 36.99940372 | 3.744806924 | 1.037720049 |
| SYNE3     | 152.9861693 | 1.385216132 | 0.409233653 |
| CD151     | 96.71232662 | 1.153851498 | 0.292922909 |
| TMEM187   | 494.1272909 | 1.02983834  | 0.23743651  |
| RRS1      | 265.740146  | 1.35417056  | 0.410181955 |
| MACIR     | 218.1863004 | 2.868925017 | 0.454152242 |
| HHIPL1    | 15.23300104 | 5.711511755 | 1.368612562 |
| DGAT1     | 551.4100207 | 1.486525904 | 0.217427833 |
| ADSS1     | 22.18356857 | 5.045482539 | 1.145780432 |

## E2\_mildcontrol\_up

|                 |             |             |             |
|-----------------|-------------|-------------|-------------|
| GPAT2           | 59.81469079 | 2.009731924 | 0.629601359 |
| ERCC6L          | 74.27976864 | 1.992067928 | 0.634546433 |
| ZFP69           | 394.7661375 | 1.2139567   | 0.314505332 |
| CCDC157         | 116.1239703 | 1.243849897 | 0.333659958 |
| PEAK3           | 24.89565897 | 2.212447888 | 0.680802175 |
| DUSP28          | 261.7215181 | 1.043953699 | 0.271877159 |
| GRAPL           | 23.99911798 | 1.435259385 | 0.329238579 |
| AFAP1           | 32.65933748 | 2.251395645 | 0.692429524 |
| GAL3ST4         | 1100.944563 | 1.179375306 | 0.33590102  |
| SRC             | 49.53591385 | 4.307002121 | 1.129653891 |
| MIRLET7BHG      | 83.72773995 | 1.348131991 | 0.372343667 |
| BZW1P2          | 10.87540042 | 1.267315819 | 0.424434291 |
| RUSC2           | 45.18607736 | 4.111517127 | 1.124581108 |
| SPOUT1          | 31.55947833 | 1.628751335 | 0.423471403 |
| LINC02731       | 17.39138681 | 3.356513459 | 0.873876586 |
| HSPA1B          | 286.2556304 | 1.275199494 | 0.281945173 |
| MIR570          | 23.34409449 | 1.21300143  | 0.324444073 |
| TRDC            | 250.4511811 | 1.036757677 | 0.320028516 |
| GSTM2           | 203.8835503 | 1.285765345 | 0.331899602 |
| ZNF726          | 26.3697962  | 1.773376566 | 0.61771838  |
| ZNF90           | 75.57248187 | 1.390000266 | 0.479499826 |
| DDX3X           | 5876.882873 | 1.018074811 | 0.342247619 |
| ENSG00000216285 | 10.56926109 | 1.836360824 | 0.466784578 |
| BCL10-AS1       | 47.04693018 | 1.566118201 | 0.487102912 |
| NSUN5P1         | 167.8457427 | 1.203421491 | 0.32159766  |
| ENSG00000224610 | 18.57337618 | 2.10136231  | 0.620586481 |
| TMEM183BP       | 13.90245791 | 1.484135116 | 0.508018049 |
| HSPA7           | 13.98621995 | 1.365645078 | 0.423067224 |
| FTH1P20         | 67.09901719 | 2.752335246 | 0.680503556 |
| LINC01624       | 33.71386859 | 6.587290442 | 1.214838929 |
| SUCLA2-AS1      | 19.15396804 | 2.173661097 | 0.607753116 |
| ENSG00000228862 | 19.76790191 | 3.030918074 | 0.914746429 |
| LSM12P1         | 15.23877378 | 1.025361386 | 0.360746061 |
| ENSG00000232876 | 25.21549144 | 3.172997434 | 0.966300083 |
| LIX1L-AS1       | 65.56590543 | 1.49402584  | 0.510162601 |
| SOD1-DT         | 83.19403792 | 2.044437857 | 0.674563062 |
| ENSG00000235872 | 28.45818508 | 1.851551487 | 0.477460979 |
| ENSG00000236449 | 27.95277944 | 2.7750421   | 0.581381307 |
| MAP3K2-DT       | 61.0538989  | 1.171888991 | 0.362371006 |
| IRGM            | 24.21453037 | 5.505633661 | 1.318550287 |
| TXNDC5          | 18.75191099 | 2.39539584  | 0.659786769 |
| ENSG00000239415 | 46.91866364 | 2.139668365 | 0.621481449 |
| ENSG00000241782 | 56.16209245 | 1.206648994 | 0.3789866   |
| ENSG00000241962 | 41.70874752 | 1.195007071 | 0.413477961 |
| ARHGEF35-AS1    | 25.00493171 | 3.256895689 | 0.685597143 |
| ALKBH3-AS1      | 22.93249209 | 2.632114071 | 0.652306262 |
| KCTD13-DT       | 18.94870658 | 4.585944197 | 1.151428595 |
| INSL3           | 67.43361979 | 2.469038952 | 0.38226726  |
| TICAM2-AS1      | 54.00517657 | 1.827457542 | 0.436435378 |
| MTA1-DT         | 25.98595729 | 7.222852393 | 1.303090359 |
| DPP3            | 416.0553636 | 1.643714678 | 0.531505758 |
| STX17-DT        | 21.49296141 | 3.020604764 | 1.062379621 |
| OVCH1-AS1       | 217.2582383 | 1.036818139 | 0.287424286 |

## E2\_mildcontrol\_up

|                 |             |             |             |
|-----------------|-------------|-------------|-------------|
| LINC02295       | 431.8447315 | 1.036677095 | 0.270208969 |
| IQCH-AS1        | 223.2802919 | 1.023437023 | 0.252941123 |
| ENSG00000260978 | 24.00136886 | 2.438889899 | 0.791219757 |
| ENSG00000261535 | 41.32482591 | 2.202591528 | 0.720638518 |
| NDUFA7          | 31.0295998  | 1.723398262 | 0.462671727 |
| EGLN2           | 27.23376506 | 3.325620083 | 0.74019756  |
| ARMCX5-GPRASP2  | 140.650143  | 1.509402523 | 0.320263708 |
| ENSG00000279406 | 14.66881837 | 1.307429209 | 0.46169056  |
| ENSG00000279415 | 38.32879312 | 2.138654368 | 0.655189092 |
| ENSG00000279884 | 17.51370731 | 2.795005424 | 0.83821174  |
| ENSG00000280135 | 28.42322904 | 3.362507471 | 0.945307161 |
| TMEM272         | 24.95786521 | 2.00702645  | 0.674541572 |
| ENSG00000285646 | 56.70128471 | 1.726418691 | 0.502188083 |
| ENSG00000286331 | 43.73299408 | 2.19700495  | 0.471512817 |
| ENSG00000286416 | 20.78327311 | 2.421351815 | 0.785244188 |
| ENSG00000287400 | 15.72038073 | 2.257756783 | 0.550534358 |
| ENSG00000287562 | 117.8227488 | 1.60409839  | 0.510793907 |
| ENSG00000287975 | 37.06358443 | 1.85314998  | 0.542004464 |
| ENSG00000288573 | 58.48144387 | 1.199470656 | 0.419846142 |
| ENSG00000289298 | 24.22079314 | 2.844483359 | 0.981736743 |
| ENSG00000289311 | 88.30608198 | 1.682168583 | 0.557439675 |
| ENSG00000289531 | 58.59714785 | 2.706445257 | 0.552972362 |

## E2\_mildcontrol\_up

| Test Statistic Value | p             | Adjusted P value |
|----------------------|---------------|------------------|
| 2.973094017          | 0.002948141   | 0.035707097      |
| 3.657141003          | 0.000255044   | 0.007132106      |
| 3.064406985          | 0.00218102    | 0.029685343      |
| 5.256692886          | 0.000000147   | 0.0000518        |
| 3.841110504          | 0.000122479   | 0.004648499      |
| 3.6765291            | 0.000236429   | 0.006769896      |
| 3.245086576          | 0.001174149   | 0.019645963      |
| 2.899104605          | 0.0037423     | 0.041790396      |
| 3.66844712           | 0.000244028   | 0.006909275      |
| 3.909174603          | 0.0000926     | 0.003912107      |
| 3.772011077          | 0.000161937   | 0.005449128      |
| 3.501703009          | 0.000462295   | 0.010680274      |
| 3.232597042          | 0.001226705   | 0.020275983      |
| 3.123052348          | 0.001789859   | 0.025751003      |
| 4.466167794          | 0.00000796    | 0.000774688      |
| 5.078135821          | 0.000000381   | 0.0000933        |
| 3.803891887          | 0.00014244    | 0.005003877      |
| 2.991606482          | 0.002775137   | 0.034240231      |
| 4.361454303          | 0.0000129     | 0.001053131      |
| 2.982037938          | 0.002863365   | 0.034959182      |
| 6.113506213          | 9.75E-10      | 0.00000114       |
| 3.065324004          | 0.002174343   | 0.029621032      |
| 3.619510608          | 0.000295161   | 0.007810414      |
| 3.67515419           | 0.000237706   | 0.006780871      |
| 3.902480431          | 0.0000952     | 0.00395873       |
| 3.826076007          | 0.000130202   | 0.004787935      |
| 4.761294051          | 0.00000192    | 0.000278018      |
| 3.220015461          | 0.001281837   | 0.020939888      |
| 3.637554075          | 0.000275239   | 0.007510182      |
| 4.372128937          | 0.0000123     | 0.001020365      |
| 3.82423399           | 0.000131179   | 0.00480864       |
| 3.642700895          | 0.000269792   | 0.007390555      |
| 4.140513144          | 0.0000347     | 0.002022667      |
| 4.087168532          | 0.0000437     | 0.002358328      |
| 4.180148041          | 0.0000291     | 0.001782687      |
| 5.995158681          | 0.00000000203 | 0.00000206       |
| 3.891054898          | 0.0000998     | 0.004068791      |
| 4.212240213          | 0.0000253     | 0.001592223      |
| 2.934595003          | 0.003339833   | 0.038604494      |
| 3.656996336          | 0.000255188   | 0.007132106      |
| 4.952473782          | 0.000000733   | 0.00014632       |
| 3.148499489          | 0.00164111    | 0.024393229      |
| 7.022439887          | 2.18E-12      | 0.0000000165     |
| 4.072209888          | 0.0000466     | 0.002456782      |
| 3.694905407          | 0.000219969   | 0.006511575      |
| 3.758341932          | 0.000171043   | 0.005667575      |
| 4.650370955          | 0.00000331    | 0.000412163      |
| 4.149781008          | 0.0000333     | 0.001965165      |
| 5.145193209          | 0.000000267   | 0.0000724        |
| 3.536762044          | 0.000405064   | 0.009695991      |
| 4.906860025          | 0.000000925   | 0.0001672        |
| 3.228374857          | 0.001244957   | 0.020469632      |

## E2\_mildcontrol\_up

|             |               |             |
|-------------|---------------|-------------|
| 3.938275603 | 0.0000821     | 0.003631148 |
| 3.596310461 | 0.000322763   | 0.008344539 |
| 4.375928475 | 0.0000121     | 0.001013829 |
| 3.795413139 | 0.000147398   | 0.005089948 |
| 5.361231818 | 0.0000000827  | 0.0000322   |
| 5.304296575 | 0.000000113   | 0.0000419   |
| 6.590567696 | 4.38E-11      | 0.000000133 |
| 3.827674777 | 0.00012936    | 0.004787935 |
| 3.454764414 | 0.000550774   | 0.012131414 |
| 4.229263648 | 0.0000234     | 0.001501319 |
| 3.686626242 | 0.000227247   | 0.006619379 |
| 5.01113858  | 0.000000541   | 0.000117308 |
| 4.942350082 | 0.000000772   | 0.000152127 |
| 4.560698982 | 0.0000051     | 0.000568917 |
| 3.201115718 | 0.001368965   | 0.021822919 |
| 2.913500819 | 0.003574009   | 0.040446801 |
| 5.917739983 | 0.00000000326 | 0.00000291  |
| 3.217894505 | 0.001291353   | 0.02102744  |
| 3.567600731 | 0.000360265   | 0.008919054 |
| 5.148028658 | 0.000000263   | 0.0000724   |
| 3.040112443 | 0.002364898   | 0.031080699 |
| 3.364149381 | 0.0007678     | 0.014952415 |
| 4.216269217 | 0.0000248     | 0.001570572 |
| 4.604434635 | 0.00000414    | 0.000486559 |
| 5.844851884 | 0.00000000507 | 0.00000405  |
| 4.826610804 | 0.00000139    | 0.000216795 |
| 3.159898826 | 0.001578239   | 0.023879721 |
| 2.86033265  | 0.004231968   | 0.045069721 |
| 2.932492466 | 0.003362531   | 0.038698519 |
| 3.918277722 | 0.0000892     | 0.00383998  |
| 4.728123852 | 0.00000227    | 0.00031487  |
| 3.781342161 | 0.000155985   | 0.005319618 |
| 3.439512089 | 0.000582764   | 0.012605864 |
| 4.907614712 | 0.000000922   | 0.0001672   |
| 6.05166719  | 0.00000000143 | 0.00000155  |
| 3.569728762 | 0.000357351   | 0.008890425 |
| 5.875923028 | 0.0000000042  | 0.00000355  |
| 3.028142153 | 0.002460623   | 0.031876373 |
| 3.688983671 | 0.000225152   | 0.006596335 |
| 3.935149709 | 0.0000831     | 0.003646839 |
| 3.194169824 | 0.001402336   | 0.022204984 |
| 3.85099182  | 0.00011764    | 0.004562588 |
| 3.784411201 | 0.000154073   | 0.005271823 |
| 2.841048675 | 0.004496545   | 0.047074684 |
| 3.079497408 | 0.002073502   | 0.028737409 |
| 3.238512621 | 0.001201547   | 0.019994164 |
| 3.126279873 | 0.00177033    | 0.025612009 |
| 3.7353968   | 0.000187419   | 0.005913258 |
| 3.306396908 | 0.000945041   | 0.017094094 |
| 3.811938341 | 0.000137881   | 0.00491194  |
| 3.158826314 | 0.001584059   | 0.023912355 |
| 3.116150018 | 0.00183229    | 0.026225843 |
| 2.980673876 | 0.002876149   | 0.035031453 |

## E2\_mildcontrol\_up

|             |             |              |
|-------------|-------------|--------------|
| 4.322103039 | 0.0000155   | 0.001145299  |
| 2.937632899 | 0.003307284 | 0.038401943  |
| 4.027750378 | 0.0000563   | 0.002756798  |
| 3.219212898 | 0.00128543  | 0.020953477  |
| 4.192475848 | 0.0000276   | 0.001723235  |
| 4.934254038 | 0.000000805 | 0.00015456   |
| 3.620352177 | 0.000294202 | 0.007810414  |
| 3.568725788 | 0.000358722 | 0.008909917  |
| 4.285104867 | 0.0000183   | 0.001271533  |
| 2.908678099 | 0.003629604 | 0.040892996  |
| 3.277389911 | 0.001047716 | 0.018110208  |
| 3.055959891 | 0.002243413 | 0.030227499  |
| 2.882095937 | 0.003950394 | 0.043228241  |
| 3.19791358  | 0.001384258 | 0.022043539  |
| 3.214457225 | 0.001306914 | 0.021189877  |
| 4.361314736 | 0.0000129   | 0.001053131  |
| 4.287527768 | 0.0000181   | 0.001264591  |
| 2.844935462 | 0.004442042 | 0.04674926   |
| 4.045912884 | 0.0000521   | 0.002619749  |
| 3.434111228 | 0.0005945   | 0.012779228  |
| 3.38742235  | 0.000705527 | 0.014276101  |
| 2.816994491 | 0.004847536 | 0.049725819  |
| 3.303292888 | 0.000955565 | 0.01718206   |
| 2.920909762 | 0.003490109 | 0.03979406   |
| 3.328804517 | 0.000872196 | 0.016260991  |
| 4.643397962 | 0.00000343  | 0.000422862  |
| 4.039190995 | 0.0000536   | 0.002677559  |
| 3.170227261 | 0.001523198 | 0.023302466  |
| 3.05380785  | 0.002259568 | 0.030284618  |
| 3.555248378 | 0.000377622 | 0.009158819  |
| 4.450611117 | 0.00000856  | 0.000802138  |
| 4.321874897 | 0.0000155   | 0.001145299  |
| 3.723833511 | 0.00019622  | 0.006077225  |
| 4.825009337 | 0.0000014   | 0.000216795  |
| 3.394421535 | 0.000687737 | 0.014046009  |
| 4.460142243 | 0.00000819  | 0.000776872  |
| 2.94388316  | 0.003241223 | 0.037978416  |
| 4.356964275 | 0.0000132   | 0.001053364  |
| 2.941381398 | 0.003267519 | 0.038173884  |
| 4.045854554 | 0.0000521   | 0.002619749  |
| 3.358117019 | 0.000784754 | 0.015132686  |
| 3.310952318 | 0.000929791 | 0.016980145  |
| 4.250090998 | 0.0000214   | 0.001409941  |
| 3.627253528 | 0.000286452 | 0.007667011  |
| 3.60868707  | 0.000307751 | 0.008038593  |
| 3.384902787 | 0.000712035 | 0.01433135   |
| 3.939096139 | 0.0000818   | 0.003629334  |
| 4.337320912 | 0.0000144   | 0.001102182  |
| 3.301389889 | 0.000962071 | 0.017231501  |
| 6.317099756 | 2.67E-10    | 0.000000368  |
| 4.173213015 | 0.00003     | 0.001823147  |
| 6.836870335 | 8.09E-12    | 0.0000000409 |
| 4.403533522 | 0.0000107   | 0.000940838  |

## E2\_mildcontrol\_up

|             |              |             |
|-------------|--------------|-------------|
| 3.1920705   | 0.001412569  | 0.022260789 |
| 3.139357221 | 0.001693189  | 0.024947414 |
| 3.859892275 | 0.000113437  | 0.004425502 |
| 3.727896817 | 0.000193084  | 0.006019828 |
| 3.249766185 | 0.001154999  | 0.019475855 |
| 3.839799201 | 0.000123135  | 0.004648499 |
| 4.359329299 | 0.000013     | 0.001053131 |
| 3.251443745 | 0.001148205  | 0.019426041 |
| 3.511079856 | 0.00044629   | 0.010450312 |
| 3.812674089 | 0.000137471  | 0.004908859 |
| 3.620665825 | 0.000293846  | 0.007810414 |
| 2.985894041 | 0.002827506  | 0.034665754 |
| 3.656043212 | 0.000256138  | 0.007145502 |
| 3.846189664 | 0.000119969  | 0.004620935 |
| 3.840946781 | 0.000122561  | 0.004648499 |
| 4.522863368 | 0.0000061    | 0.000652019 |
| 3.738707322 | 0.000184969  | 0.00586031  |
| 3.239579056 | 0.001197063  | 0.019963324 |
| 3.873958679 | 0.000107082  | 0.004243003 |
| 2.870849602 | 0.004093702  | 0.044179933 |
| 2.898854577 | 0.003745286  | 0.041792981 |
| 2.974673174 | 0.002933009  | 0.03560907  |
| 3.9340649   | 0.0000835    | 0.00365279  |
| 3.21516904  | 0.001303677  | 0.021160007 |
| 3.742009472 | 0.000182555  | 0.005808069 |
| 3.386091018 | 0.000708959  | 0.01432644  |
| 2.921422021 | 0.003484375  | 0.039758551 |
| 3.227962364 | 0.001246754  | 0.020476986 |
| 4.04455674  | 0.0000524    | 0.002625609 |
| 5.42235706  | 0.0000000588 | 0.0000248   |
| 3.576552782 | 0.000348155  | 0.008776746 |
| 3.313397001 | 0.0009217    | 0.016868692 |
| 2.842335644 | 0.004478432  | 0.046991639 |
| 3.28365638  | 0.001024698  | 0.017936348 |
| 2.928528743 | 0.003405703  | 0.039036975 |
| 3.030758683 | 0.002439401  | 0.031722668 |
| 3.877911634 | 0.000105357  | 0.004207625 |
| 4.773187693 | 0.00000181   | 0.000269795 |
| 3.233948006 | 0.001220917  | 0.020227766 |
| 4.175520428 | 0.0000297    | 0.001812012 |
| 3.630560588 | 0.000282806  | 0.0076399   |
| 3.44285154  | 0.000575615  | 0.012569117 |
| 3.183883007 | 0.001453137  | 0.022688078 |
| 2.890134867 | 0.003850766  | 0.042656367 |
| 4.750451079 | 0.00000203   | 0.000285658 |
| 4.035089383 | 0.0000546    | 0.002704337 |
| 3.982829866 | 0.0000681    | 0.00319988  |
| 6.458933867 | 1.05E-10     | 0.000000178 |
| 4.187235123 | 0.0000282    | 0.00174501  |
| 5.542863812 | 0.0000000298 | 0.0000146   |
| 3.092562318 | 0.001984366  | 0.027755514 |
| 2.843244263 | 0.004465683  | 0.046932969 |
| 3.607273948 | 0.000309431  | 0.008054757 |

## E2\_mildcontrol\_up

|             |             |             |
|-------------|-------------|-------------|
| 3.836575444 | 0.000124762 | 0.0046866   |
| 4.046147231 | 0.0000521   | 0.002619749 |
| 3.082443122 | 0.00205309  | 0.028585035 |
| 3.056444351 | 0.002239791 | 0.030214277 |
| 3.724883461 | 0.000195405 | 0.006064363 |
| 4.492881714 | 0.00000703  | 0.000696963 |
| 4.712998958 | 0.00000244  | 0.000333732 |
| 2.831830064 | 0.004628244 | 0.048042564 |
| 3.264178835 | 0.001097818 | 0.018740712 |
| 3.334486134 | 0.000854572 | 0.016090544 |
| 3.557052785 | 0.000375039 | 0.009158819 |
| 2.975393262 | 0.002926132 | 0.035554022 |
| 3.437793029 | 0.000586476 | 0.012655143 |
| 4.659480866 | 0.00000317  | 0.000404278 |
| 3.083565408 | 0.002045361 | 0.02855603  |
| 4.101027935 | 0.0000411   | 0.002279986 |
| 3.140402359 | 0.001687159 | 0.024914375 |
| 3.419067743 | 0.000628361 | 0.01322608  |
| 2.856929087 | 0.004277614 | 0.045364828 |
| 2.897399307 | 0.003762705 | 0.041925706 |
| 3.017669281 | 0.002547267 | 0.032512471 |
| 4.894358999 | 0.000000986 | 0.000174539 |

## E3\_Severecontrol\_down

| Gene Symbol     | baseMean    | Log2 Fold Change | Log2 Fold Change | Standard Error |
|-----------------|-------------|------------------|------------------|----------------|
| CXCR2           | 629.6759306 | -7.454621539     |                  | 0.893174966    |
| RGS2            | 3248.819656 | -2.409189874     |                  | 0.323577983    |
| RUBCNL          | 67.29749647 | -8.998660971     |                  | 1.391055807    |
| G0S2            | 3817.681858 | -5.478339431     |                  | 0.867565013    |
| LINC01506       | 21.4096407  | -7.657359613     |                  | 1.225275395    |
| CAMP            | 49.96692252 | -7.894037686     |                  | 1.279124523    |
| PTGS2           | 90.51021035 | -6.396317182     |                  | 1.076616471    |
| MNDA            | 631.829706  | -5.072159652     |                  | 0.857609718    |
| SCGB3A1         | 145.9820462 | -5.791415484     |                  | 0.996176146    |
| FOS             | 1256.412695 | -3.330015451     |                  | 0.572697256    |
| SERPING1        | 42.4988145  | -5.640506572     |                  | 0.984596938    |
| IL1B            | 1320.770537 | -5.523624767     |                  | 0.967796078    |
| HCAR2           | 59.67652252 | -5.743584991     |                  | 1.0255014      |
| C20orf85        | 28.66551284 | -6.987144593     |                  | 1.292385596    |
| BCL2A1          | 2140.680628 | -2.581285959     |                  | 0.486309039    |
| CSTA            | 34.06570706 | -5.107126339     |                  | 0.967572771    |
| TNFRSF10C       | 112.2929697 | -4.332550207     |                  | 0.83376895     |
| FFAR2           | 151.0107032 | -6.253716649     |                  | 1.205803945    |
| OAS1            | 2194.632871 | -2.826498539     |                  | 0.557761509    |
| CEBPD           | 456.8635714 | -2.066021648     |                  | 0.407997487    |
| JDP2            | 28.82677103 | -5.1992989       |                  | 1.039518759    |
| TRIB1           | 174.7817201 | -5.515666492     |                  | 1.105903245    |
| ENSG00000275139 | 17.27159415 | -4.933643169     |                  | 0.992372619    |
| NSMCE1-DT       | 111.6408259 | -2.556229816     |                  | 0.518832143    |
| ODF3B           | 58.46135599 | -3.081708231     |                  | 0.626297055    |
| C5AR1           | 118.399816  | -4.109731931     |                  | 0.846584716    |
| MIR223HG        | 92.96781176 | -5.010368337     |                  | 1.036261231    |
| ENSG00000286865 | 28.89052683 | -2.122184674     |                  | 0.443154956    |
| ROPN1L          | 44.38110341 | -4.495828259     |                  | 0.939844123    |
| HCAR3           | 35.05530288 | -5.136569167     |                  | 1.076347932    |
| OSM             | 539.0114319 | -4.496237247     |                  | 0.950950564    |
| PROK2           | 675.2022679 | -4.785288206     |                  | 1.012098217    |
| IL1R2           | 326.5650569 | -5.484009662     |                  | 1.168424023    |
| MIR3945HG       | 100.466936  | -4.545836834     |                  | 0.971143094    |
| CCL4L2          | 674.9543142 | -4.790615821     |                  | 1.028075899    |
| CXCL8           | 1936.005375 | -4.505213537     |                  | 0.972157459    |
| PPIAP30         | 18.67076734 | -3.513375099     |                  | 0.759858716    |
| ENSG00000255197 | 21.8591341  | -5.03810707      |                  | 1.090422421    |
| SCGB1A1         | 45.58121958 | -5.943765977     |                  | 1.292749284    |
| FCGR3B          | 475.0804907 | -4.479512663     |                  | 0.992031092    |
| PLBD1           | 63.67266478 | -4.530414575     |                  | 1.004402467    |
| FCN1            | 43.86138885 | -5.858783272     |                  | 1.32542606     |
| PCOLCE          | 18.61560476 | -3.791707984     |                  | 0.86715675     |
| MTND5P2         | 12.52961143 | -3.350401471     |                  | 0.768667416    |
| ENSG00000287336 | 15.09228835 | -4.74355108      |                  | 1.093481942    |
| NCF1            | 110.1278381 | -2.264983489     |                  | 0.537484231    |
| MAP3K5-AS2      | 20.16690162 | -3.77970225      |                  | 0.898001971    |
| CPPED1          | 289.2955003 | -2.090153462     |                  | 0.497211098    |
| PLAUR           | 766.9875584 | -3.299491232     |                  | 0.788738163    |
| ENSG00000249679 | 18.42597375 | -4.419433506     |                  | 1.057507763    |
| ARHGEF40        | 39.37074341 | -3.95063405      |                  | 0.955768731    |
| IFITM3          | 1034.339675 | -3.055745065     |                  | 0.745725533    |

## E3\_Severecontrol\_down

|                 |             |              |             |
|-----------------|-------------|--------------|-------------|
| IQCD            | 43.5181425  | -2.614858761 | 0.639757885 |
| FCAR            | 98.81816473 | -3.938302937 | 0.963727445 |
| EML4-AS1        | 20.04261573 | -2.094236865 | 0.512588805 |
| CYP2F1          | 25.79745097 | -5.578930675 | 1.367518119 |
| MTND1P23        | 70.87177216 | -3.442459755 | 0.853106496 |
| QPCT            | 322.4750127 | -2.236268818 | 0.555518886 |
| CLEC7A          | 38.196053   | -5.851285629 | 1.461215998 |
| TLR4            | 31.72005172 | -5.784504655 | 1.448164296 |
| ENSG00000231731 | 20.21739313 | -2.890565529 | 0.724176065 |
| EGR2            | 51.34254031 | -3.037721083 | 0.761670443 |
| DHRS9           | 47.54931273 | -8.22799978  | 2.064429788 |
| CST3            | 48.62883228 | -3.098681797 | 0.77955094  |
| FPR1            | 917.7914866 | -4.258612041 | 1.07472058  |
| SIRPB1          | 90.2885524  | -2.661200193 | 0.672574913 |
| MXRA8           | 12.84161009 | -3.831640436 | 0.969465765 |
| TRIM34          | 10.43072376 | -2.707341924 | 0.698958107 |
| CXCL1           | 248.3942334 | -4.308548101 | 1.120700017 |
| S100P           | 154.0226407 | -2.784167768 | 0.729977763 |
| CLEC4E          | 182.6970815 | -4.612775801 | 1.211200009 |
| RARA-AS1        | 19.97062597 | -3.54075623  | 0.93091788  |
| TREM1           | 186.9728945 | -4.825884156 | 1.271111313 |
| CA14            | 42.83877502 | -2.139461778 | 0.565463626 |
| ESCO2           | 24.83156522 | -3.82324629  | 1.010574269 |
| MPHOSPH10P1     | 40.21412442 | -4.948263449 | 1.320300965 |
| MEFV            | 24.65827465 | -4.614057796 | 1.234843959 |
| EGR1            | 58.86103637 | -3.011495562 | 0.807880083 |
| FAHD2B          | 264.5977025 | -2.050589701 | 0.552531517 |
| PELATON         | 234.2276916 | -3.545334456 | 0.960565711 |
| KRT23           | 88.95820957 | -5.291826368 | 1.440694714 |
| GLT1D1          | 78.64713746 | -5.289220838 | 1.445720993 |
| CCL3L1          | 417.4664371 | -4.245690954 | 1.160094664 |
| CD24            | 24.35835117 | -4.413044345 | 1.207114757 |
| MARCKS          | 163.6732663 | -3.545380842 | 0.969685196 |
| ENSG00000258843 | 21.25271551 | -2.012209257 | 0.552676491 |
| INSYN2B         | 19.80071738 | -2.948109759 | 0.81167976  |
| ENSG00000271789 | 14.48010804 | -2.871249289 | 0.793964665 |
| FAM13A-AS1      | 35.23557694 | -2.025958639 | 0.560622688 |
| LILRA6          | 44.47289109 | -4.104165374 | 1.137584314 |
| TFF3            | 60.33821597 | -3.639708763 | 1.009546536 |
| ENSG00000288819 | 21.46781664 | -3.247187391 | 0.901251532 |
| FOSL1           | 29.29967336 | -4.185378936 | 1.16600185  |
| MS4A7           | 25.49962017 | -4.402694261 | 1.23615884  |
| CXCR1           | 211.6622587 | -5.029813836 | 1.420594245 |
| ARG1            | 113.1213861 | -4.500641943 | 1.271309219 |
| ENSG00000279407 | 22.46319722 | -2.870492194 | 0.811562898 |
| RPS15AP16       | 10.54556276 | -2.476422233 | 0.700370677 |
| COP1-DT         | 25.82079116 | -2.340194312 | 0.664102112 |
| RAB31           | 236.2784989 | -3.796396753 | 1.078199    |
| RGS18           | 71.2416997  | -3.628584422 | 1.031028124 |
| APOBEC3A        | 157.5005753 | -4.384591509 | 1.246448183 |
| IGSF6           | 251.7665975 | -2.225710869 | 0.633271675 |
| SPI1            | 311.9541477 | -3.818861932 | 1.089849917 |
| FCGR1BP         | 12.82050776 | -4.581947772 | 1.307226692 |

## E3\_Severecontrol\_down

|                 |             |              |             |
|-----------------|-------------|--------------|-------------|
| CYP27A1         | 34.54672289 | -4.579074515 | 1.307381639 |
| IFIT3           | 3604.816679 | -2.041159178 | 0.583669732 |
| NCF4            | 215.8155477 | -3.662253663 | 1.048148963 |
| TMTC2           | 22.69116154 | -2.351899608 | 0.672910734 |
| LINC02207       | 19.65488133 | -5.554131484 | 1.595736157 |
| LRRC19          | 21.9394201  | -2.654631014 | 0.762898467 |
| BASP1           | 625.7604351 | -3.351090227 | 0.96399205  |
| ENSG00000256981 | 45.67055999 | -2.017411621 | 0.580444084 |
| ENSG00000232811 | 12.98952026 | -3.208908351 | 0.925094315 |
| ENSG00000287403 | 13.21716299 | -2.952978827 | 0.855138299 |
| PRR4            | 9.45326853  | -2.792651745 | 0.809005156 |
| PGLYRP1         | 102.8455768 | -4.346517015 | 1.263843361 |
| SLC11A1         | 139.0959059 | -3.033282533 | 0.887825376 |
| LPCAT2          | 14.74606117 | -5.066872045 | 1.494702885 |
| ENSG00000279476 | 18.5794853  | -3.804841482 | 1.122971421 |
| CD248           | 206.5581502 | -2.060313649 | 0.60957859  |
| GMPR            | 38.02400989 | -2.344555098 | 0.696072219 |
| TPPP3           | 23.6151813  | -4.325367063 | 1.287765201 |
| PGAM1P7         | 16.1256021  | -4.055697765 | 1.208755315 |
| CDA             | 138.6994158 | -2.973793618 | 0.886433617 |
| FPR2            | 99.02210742 | -4.234723222 | 1.262854872 |
| CCL20           | 50.24900471 | -3.071751217 | 0.921051593 |
| ENSG00000231476 | 16.35721563 | -2.913009756 | 0.880894542 |
| WFDC2           | 45.49737142 | -3.379129719 | 1.024479024 |
| KCNJ15          | 99.88893972 | -3.360160808 | 1.026893876 |
| IRAG1           | 25.2447407  | -4.411809442 | 1.349523929 |
| TXLNB           | 33.72783626 | -3.579496136 | 1.102413735 |
| ANXA3           | 209.0104766 | -3.585851945 | 1.110786116 |
| LYZ             | 114.8161565 | -2.726947948 | 0.84769381  |
| GSEC            | 83.16919035 | -2.319254932 | 0.722659336 |
| KRT17           | 84.17937122 | -5.120936465 | 1.598122489 |
| CEACAM3         | 34.48329021 | -4.174789277 | 1.304131677 |
| ENSG00000286791 | 13.41755618 | -2.242654999 | 0.702251667 |
| S100A9          | 9567.933661 | -3.044743315 | 0.955318818 |
| PYGL            | 118.6956161 | -4.001023581 | 1.262321733 |
| H1-5            | 15.53035382 | -3.262439277 | 1.030277213 |
| ENSG00000277007 | 9.732478341 | -3.376972762 | 1.068040869 |
| SIRPA           | 38.09298538 | -3.583370715 | 1.141011557 |
| SHMT1P1         | 12.93124288 | -2.820687365 | 0.899099075 |
| HECW2           | 13.64692773 | -3.65309303  | 1.168841304 |
| ABRA            | 27.31622144 | -2.874213278 | 0.920736648 |
| TSPAN1          | 46.27080823 | -4.880414403 | 1.564971644 |
| FCGR2A          | 253.4334315 | -3.422038023 | 1.101817811 |
| MSMB            | 77.72455936 | -3.562335609 | 1.149286676 |
| CLEC4D          | 99.21489759 | -4.019846646 | 1.298530497 |
| ATP11A-AS1      | 19.8418235  | -3.041666883 | 0.987050243 |
| PLN             | 21.13243129 | -3.259638603 | 1.060160958 |
| MIR4435-2HG     | 24.26986818 | -2.127805332 | 0.692152473 |
| SLC44A4         | 16.11350515 | -3.174015826 | 1.033248384 |
| REPS2           | 28.97206801 | -3.526947497 | 1.149625112 |
| CREB5           | 61.43069548 | -3.996337157 | 1.303228466 |
| B3GNT7          | 10.97628137 | -2.098907935 | 0.68545135  |
| CHN1            | 96.72303612 | -2.466673073 | 0.808529929 |

## E3\_Severecontrol\_down

|                 |             |              |             |
|-----------------|-------------|--------------|-------------|
| PHOSPHO1        | 49.86904953 | -2.760208665 | 0.90479999  |
| H3P31           | 9.285844475 | -2.110746896 | 0.697167267 |
| ENSG00000228318 | 9.133659077 | -3.789204188 | 1.254845548 |
| LYN             | 573.6256572 | -2.018926393 | 0.669478071 |
| GABBR1          | 70.34774924 | -2.029098992 | 0.674171622 |
| TTYH1           | 22.00378137 | -3.588864119 | 1.192817144 |
| CMTM2           | 50.62692933 | -3.103973184 | 1.033111996 |
| LINC02362       | 29.15452267 | -2.1557888   | 0.717715494 |
| ACRBP           | 19.16562728 | -3.331517626 | 1.116411578 |
| LTBR            | 33.38402378 | -3.295461229 | 1.10996394  |
| FEZ1            | 56.9247051  | -2.02453677  | 0.683556463 |
| ENSG00000225187 | 17.30889188 | -2.154154101 | 0.730642525 |
| TNK2-AS1        | 31.37841364 | -2.013418712 | 0.683284644 |
| TXNDC12-AS1     | 10.16852097 | -3.095545141 | 1.055403131 |
| RAB5CP1         | 39.85695848 | -2.123733143 | 0.725392566 |
| NAP1L2          | 47.86569179 | -2.251550654 | 0.769176235 |
| CFAP210         | 13.96355387 | -2.746448598 | 0.941031918 |
| LCA5L           | 17.8737543  | -2.246183478 | 0.769855605 |
| COL4A4          | 16.58107865 | -3.046723531 | 1.046221152 |
| GLB1L           | 34.1691809  | -3.290106899 | 1.131338353 |
| BPIFB1          | 130.0055519 | -3.293313507 | 1.134739177 |
| ACTG1P17        | 34.65647552 | -2.322422916 | 0.80119665  |
| BPIFB9P         | 11.56900722 | -2.926852027 | 1.014543692 |
| PTAFR           | 144.7928896 | -2.160540116 | 0.750530322 |
| NCF2            | 359.1999346 | -3.149491337 | 1.103528772 |
| PLXNA2          | 15.97806684 | -3.62230464  | 1.270824875 |
| ENSG00000278931 | 15.44935869 | -2.251688284 | 0.791665532 |
| BST1            | 66.57884413 | -2.998007268 | 1.056474117 |
| S100A8          | 9592.740764 | -2.811568137 | 0.992566381 |
| ENSG00000267649 | 12.6660734  | -3.076614361 | 1.086078041 |
| RGS17           | 22.47328216 | -3.570510843 | 1.260762992 |

E3\_Severecontrol\_down

| Test Statistic Value | p             | Adjusted P value |
|----------------------|---------------|------------------|
| -8.346205194         | 7.05E-17      | 3.86E-13         |
| -7.445469109         | 9.66E-14      | 2.64E-10         |
| -6.468943175         | 9.87E-11      | 0.000000108      |
| -6.314615449         | 2.71E-10      | 0.000000247      |
| -6.249500844         | 4.12E-10      | 0.000000356      |
| -6.171437998         | 6.77E-10      | 0.000000529      |
| -5.941128853         | 0.00000000283 | 0.00000202       |
| -5.914298245         | 0.00000000333 | 0.00000228       |
| -5.813646017         | 0.00000000611 | 0.00000346       |
| -5.814617439         | 0.00000000608 | 0.00000346       |
| -5.728746816         | 0.0000000101  | 0.00000493       |
| -5.707426279         | 0.0000000115  | 0.00000504       |
| -5.600757827         | 0.0000000213  | 0.00000796       |
| -5.406393116         | 0.0000000643  | 0.000019         |
| -5.307912777         | 0.000000111   | 0.0000274        |
| -5.278286547         | 0.00000013    | 0.0000301        |
| -5.196343911         | 0.000000203   | 0.0000412        |
| -5.186346151         | 0.000000214   | 0.0000419        |
| -5.067575468         | 0.000000403   | 0.0000682        |
| -5.063809734         | 0.000000411   | 0.0000688        |
| -5.001640281         | 0.000000568   | 0.0000889        |
| -4.987476543         | 0.000000612   | 0.0000913        |
| -4.971563174         | 0.000000664   | 0.0000965        |
| -4.926891774         | 0.000000835   | 0.000120287      |
| -4.920521668         | 0.000000863   | 0.000122127      |
| -4.854483969         | 0.00000121    | 0.000153354      |
| -4.835043703         | 0.00000133    | 0.00016065       |
| -4.788809529         | 0.00000168    | 0.00019392       |
| -4.783589266         | 0.00000172    | 0.000197636      |
| -4.772220034         | 0.00000182    | 0.000203439      |
| -4.728150357         | 0.00000227    | 0.000233958      |
| -4.728086786         | 0.00000227    | 0.000233958      |
| -4.69350985          | 0.00000269    | 0.000267141      |
| -4.680913517         | 0.00000286    | 0.00027902       |
| -4.659788083         | 0.00000317    | 0.000307414      |
| -4.634242626         | 0.00000358    | 0.000339879      |
| -4.623721523         | 0.00000377    | 0.000353504      |
| -4.620326007         | 0.00000383    | 0.000356385      |
| -4.597771626         | 0.00000427    | 0.00037886       |
| -4.515496236         | 0.00000632    | 0.000510733      |
| -4.510556996         | 0.00000647    | 0.000520209      |
| -4.420301856         | 0.00000986    | 0.000694299      |
| -4.372575069         | 0.0000123     | 0.000802926      |
| -4.358714057         | 0.0000131     | 0.000842076      |
| -4.338024156         | 0.0000144     | 0.000904064      |
| -4.214046399         | 0.0000251     | 0.001376912      |
| -4.209013314         | 0.0000256     | 0.001398585      |
| -4.203754648         | 0.0000263     | 0.001419269      |
| -4.183252929         | 0.0000287     | 0.001521471      |
| -4.179102663         | 0.0000293     | 0.001532194      |
| -4.133462335         | 0.0000357     | 0.001771904      |
| -4.097680623         | 0.0000417     | 0.002008597      |

## E3\_Severecontrol\_down

|              |             |             |
|--------------|-------------|-------------|
| -4.087263045 | 0.0000436   | 0.0020826   |
| -4.086531888 | 0.0000438   | 0.002083116 |
| -4.085607887 | 0.000044    | 0.002085379 |
| -4.079602747 | 0.0000451   | 0.002109502 |
| -4.035205182 | 0.0000546   | 0.002433165 |
| -4.025549579 | 0.0000568   | 0.002501218 |
| -4.004394721 | 0.0000622   | 0.002671472 |
| -3.994370439 | 0.0000649   | 0.002743948 |
| -3.991523154 | 0.0000657   | 0.002755801 |
| -3.988235478 | 0.0000666   | 0.002787136 |
| -3.985604078 | 0.0000673   | 0.002811036 |
| -3.974957425 | 0.0000704   | 0.002917529 |
| -3.962529538 | 0.0000742   | 0.003016197 |
| -3.956734247 | 0.000076    | 0.003071631 |
| -3.952321552 | 0.0000774   | 0.003112702 |
| -3.873396555 | 0.000107329 | 0.003871627 |
| -3.844515068 | 0.000120791 | 0.004209222 |
| -3.814044629 | 0.000136711 | 0.004607462 |
| -3.808434419 | 0.000139849 | 0.004684385 |
| -3.803510821 | 0.00014266  | 0.004739827 |
| -3.796586581 | 0.000146702 | 0.004834984 |
| -3.783553317 | 0.000154605 | 0.005001417 |
| -3.783241279 | 0.000154799 | 0.005001417 |
| -3.747829913 | 0.000178371 | 0.005587033 |
| -3.736551298 | 0.000186561 | 0.005772924 |
| -3.727651695 | 0.000193272 | 0.005929303 |
| -3.711262867 | 0.000206228 | 0.006198498 |
| -3.690881753 | 0.000223478 | 0.006568338 |
| -3.673107367 | 0.000239619 | 0.0068848   |
| -3.658534991 | 0.000253661 | 0.007092572 |
| -3.659779746 | 0.000252432 | 0.007092572 |
| -3.655861481 | 0.00025632  | 0.00711449  |
| -3.656218385 | 0.000255963 | 0.00711449  |
| -3.640844672 | 0.000271745 | 0.007359986 |
| -3.632109492 | 0.000281114 | 0.007588685 |
| -3.616343919 | 0.000298793 | 0.007922609 |
| -3.613764982 | 0.000301783 | 0.007978957 |
| -3.607790056 | 0.000308816 | 0.008058188 |
| -3.605290724 | 0.000311804 | 0.008097522 |
| -3.602975725 | 0.000314595 | 0.008131412 |
| -3.589513118 | 0.000331296 | 0.008474638 |
| -3.561592669 | 0.000368612 | 0.008989641 |
| -3.540640725 | 0.000399157 | 0.009580001 |
| -3.540163068 | 0.00039988  | 0.009581355 |
| -3.536992881 | 0.000404711 | 0.009626833 |
| -3.535873666 | 0.000406429 | 0.009639768 |
| -3.523847116 | 0.00042533  | 0.009938076 |
| -3.521053861 | 0.000429835 | 0.009992757 |
| -3.519384524 | 0.000432549 | 0.010027446 |
| -3.517668499 | 0.000435356 | 0.010070245 |
| -3.514622486 | 0.00044038  | 0.010165892 |
| -3.50402553  | 0.000458281 | 0.010417968 |
| -3.505090434 | 0.000456452 | 0.010417968 |

## E3\_Severecontrol\_down

|              |             |             |
|--------------|-------------|-------------|
| -3.502477302 | 0.000460953 | 0.010449755 |
| -3.497113292 | 0.000470322 | 0.010647442 |
| -3.494020213 | 0.000475805 | 0.010662727 |
| -3.495113823 | 0.00047386  | 0.010662727 |
| -3.480607655 | 0.000500278 | 0.011036369 |
| -3.479664892 | 0.000502041 | 0.011060408 |
| -3.476263342 | 0.000508453 | 0.011172184 |
| -3.475634738 | 0.000509646 | 0.011182912 |
| -3.468736428 | 0.000522912 | 0.011428173 |
| -3.453217838 | 0.000553941 | 0.011822941 |
| -3.451957906 | 0.000556535 | 0.011862859 |
| -3.439126357 | 0.000583595 | 0.012285306 |
| -3.416530564 | 0.000634245 | 0.01285452  |
| -3.389885773 | 0.000699218 | 0.013744021 |
| -3.388190841 | 0.000703553 | 0.013812697 |
| -3.379898316 | 0.000725127 | 0.014168454 |
| -3.368264145 | 0.000756431 | 0.014503855 |
| -3.358816545 | 0.00078277  | 0.014852724 |
| -3.355267782 | 0.000792882 | 0.014975341 |
| -3.354784342 | 0.000794269 | 0.014984291 |
| -3.35329365  | 0.000798559 | 0.015047939 |
| -3.33504794  | 0.000852847 | 0.015816697 |
| -3.306876835 | 0.000943424 | 0.017012836 |
| -3.298388389 | 0.000972415 | 0.017345908 |
| -3.272159749 | 0.001067293 | 0.018556644 |
| -3.269159847 | 0.001078673 | 0.018695108 |
| -3.246962572 | 0.001166437 | 0.019870555 |
| -3.228210989 | 0.001245671 | 0.020956172 |
| -3.216902041 | 0.001295828 | 0.021526752 |
| -3.209333659 | 0.00133043  | 0.021902054 |
| -3.204345411 | 0.0013537   | 0.022218272 |
| -3.201202264 | 0.001368554 | 0.022417247 |
| -3.193520362 | 0.001405494 | 0.022817049 |
| -3.187148893 | 0.001436828 | 0.023128215 |
| -3.169575138 | 0.00152662  | 0.023920466 |
| -3.166564527 | 0.001542511 | 0.024020148 |
| -3.16183852  | 0.001567765 | 0.024357974 |
| -3.140520964 | 0.001686476 | 0.025722899 |
| -3.137237534 | 0.001705479 | 0.025822902 |
| -3.125396936 | 0.001775653 | 0.02647029  |
| -3.121645353 | 0.001798434 | 0.026712855 |
| -3.118532162 | 0.001817543 | 0.026884797 |
| -3.105811132 | 0.001897579 | 0.027733713 |
| -3.099605768 | 0.001937784 | 0.027923481 |
| -3.095689053 | 0.001963562 | 0.028195919 |
| -3.081572499 | 0.002059103 | 0.029134536 |
| -3.074663879 | 0.002107399 | 0.029537781 |
| -3.07418584  | 0.002110779 | 0.029559911 |
| -3.071880756 | 0.002127147 | 0.029645952 |
| -3.067910973 | 0.002155608 | 0.029899455 |
| -3.066490075 | 0.00216588  | 0.029933123 |
| -3.062081556 | 0.002198036 | 0.030138979 |
| -3.050812326 | 0.002282232 | 0.030945046 |

E3\_Severecontrol\_down

|              |             |             |
|--------------|-------------|-------------|
| -3.050628531 | 0.002283629 | 0.030945046 |
| -3.027604703 | 0.002465003 | 0.032786138 |
| -3.019657832 | 0.002530604 | 0.033281093 |
| -3.01567218  | 0.002564103 | 0.033533565 |
| -3.009766244 | 0.002614488 | 0.034029814 |
| -3.008729491 | 0.002623426 | 0.034119088 |
| -3.00448857  | 0.002660278 | 0.034470087 |
| -3.003681566 | 0.002667343 | 0.03452611  |
| -2.984130309 | 0.002843856 | 0.036083277 |
| -2.96898044  | 0.002987896 | 0.037208148 |
| -2.961769628 | 0.003058765 | 0.037633822 |
| -2.94830102  | 0.003195258 | 0.038830844 |
| -2.946676367 | 0.003212092 | 0.038914586 |
| -2.933045252 | 0.00335655  | 0.03995     |
| -2.92770183  | 0.003414773 | 0.040496154 |
| -2.927223373 | 0.003420032 | 0.040499984 |
| -2.918549885 | 0.003516636 | 0.041139378 |
| -2.917668538 | 0.00352659  | 0.041167797 |
| -2.912121903 | 0.003589825 | 0.041639434 |
| -2.908154658 | 0.003635685 | 0.04178748  |
| -2.902264745 | 0.003704753 | 0.042226466 |
| -2.898692744 | 0.003747219 | 0.042516652 |
| -2.884895003 | 0.003915442 | 0.043806512 |
| -2.878684647 | 0.003993374 | 0.044375933 |
| -2.854018326 | 0.004317004 | 0.046584476 |
| -2.850357049 | 0.004367018 | 0.046846967 |
| -2.844241911 | 0.004451723 | 0.047264349 |
| -2.837747957 | 0.004543304 | 0.047689302 |
| -2.832624791 | 0.004616754 | 0.048080448 |
| -2.832774666 | 0.00461459  | 0.048080448 |
| -2.832023835 | 0.00462544  | 0.04814036  |

## E4\_Severecontrol\_up

| Gene Symbol     | baseMean    | Log2 Fold Change | Log2 Fold Change | Standard Error |
|-----------------|-------------|------------------|------------------|----------------|
| ARHGEF4         | 20.67137749 | 19.35761428      |                  | 1.649405269    |
| LINC02656       | 15.41817158 | 6.897290519      |                  | 1.059792906    |
| TGFB1I1         | 12.69982586 | 6.487916615      |                  | 1.111605319    |
| TPX2            | 25.40171201 | 8.002855402      |                  | 1.399708595    |
| MACIR           | 218.1857219 | 2.708189951      |                  | 0.47772397     |
| GRAMD1C         | 19.55241809 | 7.881753691      |                  | 1.458365409    |
| GOLPH3-DT       | 12.50998766 | 6.749046652      |                  | 1.266034829    |
| ADSS1           | 22.1817628  | 6.27599377       |                  | 1.180057048    |
| KIR2DL1         | 16.57335522 | 7.114267532      |                  | 1.341205909    |
| PRRG2           | 18.63169765 | 5.348092339      |                  | 1.008365996    |
| LINC01624       | 33.71159535 | 6.669770928      |                  | 1.256718264    |
| ARVCF           | 19.6436765  | 7.30093053       |                  | 1.382797325    |
| HLA-DOA         | 34.56601669 | 8.808405938      |                  | 1.679745216    |
| GRAMD4          | 124.2109332 | 2.729815107      |                  | 0.525209636    |
| MALT1-AS1       | 8.82388094  | 6.360269966      |                  | 1.225145759    |
| HHIPL1          | 15.23341146 | 7.293227054      |                  | 1.417759074    |
| TK1             | 14.97982559 | 6.729824568      |                  | 1.332950228    |
| GFPT2           | 22.0337521  | 6.678478565      |                  | 1.324448972    |
| CDC20           | 14.92716927 | 7.723647866      |                  | 1.547683189    |
| IRGM            | 24.21397935 | 6.661487709      |                  | 1.365031029    |
| RBFOX2          | 23.29770384 | 5.762329523      |                  | 1.184051824    |
| GPC3            | 20.21873594 | 7.348841319      |                  | 1.51834045     |
| ENSG00000287077 | 12.45663835 | 4.975613952      |                  | 1.03125537     |
| GOLGA7B         | 26.55009523 | 3.644800611      |                  | 0.758303592    |
| SDC4            | 11.11608633 | 5.670364506      |                  | 1.210095141    |
| LINC02035       | 26.01734625 | 6.510067503      |                  | 1.400455711    |
| OSCP1           | 12.7613062  | 6.436007578      |                  | 1.4074973      |
| ENSG00000228862 | 19.76656979 | 4.334604328      |                  | 0.953385006    |
| STAG3           | 95.13792651 | 2.037047545      |                  | 0.452337298    |
| IRF6            | 19.85957515 | 5.907463911      |                  | 1.319263428    |
| TXNDC5          | 18.75160074 | 3.048190814      |                  | 0.685375615    |
| ENSG00000269973 | 14.51763546 | 5.115132119      |                  | 1.153438516    |
| ENSG00000213683 | 24.15100983 | 5.642366738      |                  | 1.276837857    |
| LFNG            | 57.95622049 | 2.526614225      |                  | 0.574223081    |
| AMOT            | 24.01295186 | 4.888685005      |                  | 1.125436431    |
| ACVR2B          | 96.08514565 | 2.175301836      |                  | 0.501788064    |
| GPAT2           | 59.81392747 | 2.85606978       |                  | 0.658857041    |
| ENSG00000285646 | 56.70019783 | 2.268491006      |                  | 0.526423217    |
| ZNF683          | 36.99725314 | 4.6121235        |                  | 1.086644621    |
| HAAO            | 10.30003733 | 5.868573         |                  | 1.388391971    |
| RNF32           | 12.44564166 | 3.621134627      |                  | 0.858138584    |
| C8orf88         | 9.09513446  | 5.03435484       |                  | 1.195551641    |
| SPINDOC         | 13.65114831 | 3.257965555      |                  | 0.7794105      |
| PRSS21          | 15.22182261 | 6.669341239      |                  | 1.599568297    |
| LINC00544       | 8.324930702 | 6.273907688      |                  | 1.510430203    |
| MMP28           | 399.3161322 | 2.113157997      |                  | 0.509689592    |
| KCTD13-DT       | 18.94860632 | 4.928114402      |                  | 1.196603396    |
| EGLN2           | 27.23381996 | 3.181428174      |                  | 0.775095259    |
| STX2            | 138.3040042 | 2.30645984       |                  | 0.563423131    |
| ARAP3           | 34.26031881 | 2.879520763      |                  | 0.705181275    |
| PHLDB2          | 24.27751451 | 5.332486174      |                  | 1.32299246     |
| ENSG00000273189 | 11.09937397 | 4.437980975      |                  | 1.103422834    |

## E4\_Severecontrol\_up

|                 |             |             |             |
|-----------------|-------------|-------------|-------------|
| RNF122          | 17.2827251  | 3.214564334 | 0.808506314 |
| MYO10           | 23.51222832 | 2.595771783 | 0.657147267 |
| HNRNPA1P50      | 16.1356952  | 3.869307693 | 0.981557858 |
| ENSG00000270990 | 11.98714394 | 4.725148291 | 1.200626975 |
| PLEKHG1         | 18.44225936 | 6.331985989 | 1.609287565 |
| TEC             | 140.0512682 | 2.563091427 | 0.652202328 |
| PLAC9           | 10.8670025  | 2.758618245 | 0.702425876 |
| ADAM9           | 32.73445278 | 4.325095358 | 1.10670693  |
| NPTXR           | 38.95032766 | 3.185279701 | 0.814911039 |
| BTBD3           | 71.5240045  | 3.994001246 | 1.022585028 |
| RUSC2           | 45.18469936 | 4.578572764 | 1.176784446 |
| ENSG00000239415 | 46.92014956 | 2.532237219 | 0.651950512 |
| ARHGEF35-AS1    | 25.00499218 | 2.783932493 | 0.718707364 |
| MTA1-DT         | 25.98500785 | 5.242689226 | 1.355017815 |
| ENSG00000236449 | 27.95312941 | 2.354102773 | 0.609477611 |
| RN7SKP163       | 10.56050272 | 3.404194609 | 0.881975054 |
| ENSG00000272356 | 14.8222306  | 2.562671511 | 0.665726745 |
| SOD1-DT         | 83.19293419 | 2.714342688 | 0.708077227 |
| ANKRD50         | 19.41287947 | 6.08516985  | 1.590665748 |
| LINC01237       | 6.837939116 | 3.76851813  | 0.98850512  |
| IQCIN           | 32.13266006 | 2.889348014 | 0.766867499 |
| ELOVL4          | 151.4800898 | 3.230637905 | 0.858801937 |
| ENSG00000253620 | 10.61534403 | 2.816477405 | 0.751132814 |
| ADAM11          | 12.83401448 | 4.798321242 | 1.282239206 |
| NLN             | 105.318158  | 3.945220744 | 1.064319202 |
| AGO4            | 235.5523937 | 2.013849827 | 0.546170448 |
| ENSG00000214955 | 9.523353534 | 2.869688859 | 0.779159921 |
| GSDMA           | 33.71040677 | 4.691786833 | 1.275427802 |
| MAP3K21         | 23.20268724 | 4.335530487 | 1.195139855 |
| PACSIN3         | 7.25200551  | 6.016852455 | 1.661990811 |
| LCA5            | 35.03312225 | 3.538440361 | 0.987898775 |
| ENSG00000286416 | 20.78205465 | 2.892721214 | 0.820781616 |
| PRKAR2B         | 39.41034548 | 6.097407606 | 1.740077803 |
| LOXL2           | 44.10348205 | 2.669430458 | 0.763981318 |
| HACD1           | 25.41636088 | 4.375036425 | 1.254104288 |
| VASH1           | 22.0686025  | 2.834379492 | 0.812840119 |
| DNASE1L1        | 42.09687264 | 2.18344615  | 0.630899727 |
| SLC13A3         | 20.82286126 | 2.619103988 | 0.762465501 |
| XYLB            | 18.5230796  | 2.699339741 | 0.786668243 |
| KDM5C-IT1       | 9.196973449 | 3.140344653 | 0.915028065 |
| GALNS           | 113.1546505 | 2.324239687 | 0.678456256 |
| FGFR1           | 243.002323  | 2.111967585 | 0.617176333 |
| LINC00891       | 9.918775625 | 2.413328098 | 0.709544038 |
| LINC00862       | 15.58891784 | 3.544871891 | 1.04638567  |
| ENSG00000260774 | 8.94142248  | 2.703000758 | 0.799629847 |
| FAM187B2P       | 15.74472101 | 3.88955621  | 1.153601718 |
| DNTT            | 94.7348932  | 3.290366641 | 0.976288338 |
| LARGE2          | 21.21916987 | 4.007053074 | 1.191400902 |
| CMBL            | 12.23250868 | 5.107820922 | 1.539956868 |
| MAP1A           | 81.04462379 | 2.30449056  | 0.701075946 |
| ENSG00000260978 | 24.00328561 | 2.727602425 | 0.829972281 |
| AFAP1           | 32.6594461  | 2.33073119  | 0.724909331 |
| ESAM            | 138.8111221 | 2.069630251 | 0.644645604 |

## E4\_Severecontrol\_up

|                 |             |             |             |
|-----------------|-------------|-------------|-------------|
| MROH8           | 45.26627598 | 2.708893022 | 0.846455385 |
| MMP11           | 12.5319958  | 5.280314267 | 1.659575548 |
| YY2             | 21.23654752 | 2.470060882 | 0.77888147  |
| ALKBH3-AS1      | 22.9327936  | 2.161068132 | 0.684085453 |
| ARRDC4          | 17.08574843 | 5.58150086  | 1.7921494   |
| LINC00951       | 10.03890651 | 5.585699389 | 1.802067335 |
| ECI1-AS1        | 13.54097469 | 2.588045715 | 0.834843494 |
| SORBS1          | 16.59070531 | 4.09272427  | 1.32460036  |
| ENSG00000249685 | 10.76198281 | 2.562619282 | 0.830998517 |
| LINC02731       | 17.39095149 | 2.817722716 | 0.915751837 |
| CGN             | 13.33068044 | 4.919429852 | 1.600711157 |
| ENSG00000261468 | 45.85613687 | 3.817458842 | 1.242859169 |
| ENSG00000279884 | 17.5132316  | 2.683912241 | 0.877132771 |
| FAM229A         | 12.91126861 | 3.042751152 | 0.998647361 |
| DDR2            | 26.17654581 | 4.873208216 | 1.623687341 |
| ENSG00000228366 | 14.75621922 | 2.559283272 | 0.854716682 |
| CCDC71          | 23.08350446 | 2.898836063 | 0.970621443 |
| BNIP1           | 31.89300741 | 2.064913017 | 0.692983187 |
| ZNF687          | 64.56471859 | 2.360811348 | 0.792821184 |
| ARHGAP32        | 87.71848114 | 2.071396073 | 0.697174746 |
| PRSS37          | 27.49330813 | 3.674630054 | 1.238142848 |
| MTUS2           | 15.01779128 | 2.620616752 | 0.88888626  |
| FOXP3           | 19.01220196 | 4.405691113 | 1.497455444 |
| RAB6B           | 71.29540536 | 2.355729616 | 0.801315952 |
| ZNF404          | 41.39834567 | 4.210752717 | 1.432116531 |
| MYOM1           | 74.83616712 | 2.133011817 | 0.725669228 |
| CEP112          | 83.476959   | 2.522227232 | 0.862450524 |
| ZBED8           | 19.24027976 | 4.755052736 | 1.627860018 |
| FADS2           | 11.87067949 | 4.462851002 | 1.528217863 |
| TOX-DT          | 30.87458368 | 2.626012162 | 0.902711866 |
| ZKSCAN7         | 38.60810405 | 3.022737438 | 1.039443007 |
| PPM1L-DT        | 27.03805961 | 2.749875981 | 0.945464418 |
| HCN3            | 17.69857487 | 4.300494219 | 1.480608935 |
| TMEM217         | 20.13845165 | 2.794248049 | 0.963478913 |
| ENSG00000231305 | 16.79198177 | 2.347648533 | 0.81138568  |
| ENSG00000289298 | 24.22031523 | 2.950352759 | 1.029760163 |
| MICAL2          | 56.6439546  | 2.446994955 | 0.854312152 |
| CCR2            | 17.61531316 | 5.01203978  | 1.756792405 |
| CTTN-DT         | 11.45504837 | 2.887639558 | 1.012174102 |
| ATP5C1          | 79.27987403 | 2.160203389 | 0.758174787 |
| ENSG00000261535 | 41.32593109 | 2.152649968 | 0.757693239 |
| MYT1L           | 17.09228411 | 3.7931807   | 1.336073082 |
| ARMC9           | 25.39221581 | 3.395643585 | 1.202301411 |
| PPP1R26P1       | 28.08886906 | 2.510826797 | 0.889438532 |
| ENSG00000258623 | 9.964395365 | 3.124291551 | 1.109079771 |

E4\_Severecontrol\_up

| Test Statistic Value | p            | Adjusted P value |
|----------------------|--------------|------------------|
| 11.73611764          | 8.32E-32     | 1.37E-27         |
| 6.508149359          | 7.61E-11     | 0.0000000961     |
| 5.836528942          | 0.0000000533 | 0.00000336       |
| 5.717515368          | 0.000000108  | 0.00000493       |
| 5.668942986          | 0.000000144  | 0.00000575       |
| 5.404512232          | 0.000000065  | 0.000019         |
| 5.330853858          | 0.0000000978 | 0.0000259        |
| 5.318381668          | 0.000000105  | 0.0000268        |
| 5.304381294          | 0.000000113  | 0.0000274        |
| 5.303721426          | 0.000000113  | 0.0000274        |
| 5.307292113          | 0.000000111  | 0.0000274        |
| 5.279826913          | 0.000000129  | 0.0000301        |
| 5.243894048          | 0.000000157  | 0.0000341        |
| 5.197572403          | 0.000000202  | 0.0000412        |
| 5.191439401          | 0.000000209  | 0.0000418        |
| 5.144193528          | 0.000000269  | 0.0000506        |
| 5.048819098          | 0.000000445  | 0.0000737        |
| 5.042458191          | 0.00000046   | 0.0000754        |
| 4.990457946          | 0.000000602  | 0.0000907        |
| 4.880099841          | 0.00000106   | 0.000142136      |
| 4.866619354          | 0.00000114   | 0.000149892      |
| 4.840048434          | 0.0000013    | 0.000157817      |
| 4.824812646          | 0.0000014    | 0.000167886      |
| 4.806518983          | 0.00000154   | 0.000180052      |
| 4.685883213          | 0.00000279   | 0.000273965      |
| 4.648535081          | 0.00000334   | 0.000321351      |
| 4.572660693          | 0.00000482   | 0.000413822      |
| 4.546541325          | 0.00000545   | 0.000452059      |
| 4.503381781          | 0.00000669   | 0.000527148      |
| 4.477850128          | 0.00000754   | 0.000577299      |
| 4.447474853          | 0.00000869   | 0.000628218      |
| 4.434681213          | 0.00000922   | 0.000658009      |
| 4.419015857          | 0.00000992   | 0.000695458      |
| 4.40005689           | 0.0000108    | 0.000741688      |
| 4.34381265           | 0.000014     | 0.000890825      |
| 4.335100801          | 0.0000146    | 0.000906669      |
| 4.334885418          | 0.0000146    | 0.000906669      |
| 4.309253338          | 0.0000164    | 0.000988441      |
| 4.244371536          | 0.0000219    | 0.001266846      |
| 4.226884859          | 0.0000237    | 0.001331863      |
| 4.219755057          | 0.0000245    | 0.001360274      |
| 4.210905381          | 0.0000254    | 0.001391545      |
| 4.180038062          | 0.0000291    | 0.001532194      |
| 4.169463256          | 0.0000305    | 0.001561116      |
| 4.153722347          | 0.0000327    | 0.001651956      |
| 4.145970467          | 0.0000338    | 0.001698406      |
| 4.118419202          | 0.0000381    | 0.001863463      |
| 4.1045641            | 0.0000405    | 0.001961223      |
| 4.093654863          | 0.0000425    | 0.002031892      |
| 4.083376663          | 0.0000444    | 0.002093412      |
| 4.030624767          | 0.0000556    | 0.002461012      |
| 4.022012995          | 0.0000577    | 0.002512141      |

## E4\_Severecontrol\_up

|             |             |             |
|-------------|-------------|-------------|
| 3.975929782 | 0.0000701   | 0.002912988 |
| 3.950060986 | 0.0000781   | 0.003117084 |
| 3.942006743 | 0.0000808   | 0.003180371 |
| 3.935567325 | 0.000083    | 0.003247598 |
| 3.934651661 | 0.0000833   | 0.003248193 |
| 3.929902298 | 0.000085    | 0.003284656 |
| 3.927273096 | 0.0000859   | 0.003310125 |
| 3.908076513 | 0.000093    | 0.003518351 |
| 3.908745307 | 0.0000928   | 0.003518351 |
| 3.905788894 | 0.0000939   | 0.003535514 |
| 3.890748878 | 0.0000999   | 0.00370257  |
| 3.884094227 | 0.000102712 | 0.003754595 |
| 3.873527159 | 0.000107271 | 0.003871627 |
| 3.869092472 | 0.000109241 | 0.003914795 |
| 3.862492617 | 0.000112236 | 0.003989832 |
| 3.859740241 | 0.000113508 | 0.004015087 |
| 3.849434518 | 0.000118391 | 0.004164967 |
| 3.833399218 | 0.000126385 | 0.004348743 |
| 3.825549055 | 0.000130481 | 0.004461633 |
| 3.812340525 | 0.000137657 | 0.004620379 |
| 3.767727823 | 0.00016474  | 0.005250253 |
| 3.761796248 | 0.000168697 | 0.005355573 |
| 3.749639679 | 0.000177089 | 0.005557474 |
| 3.742142045 | 0.000182458 | 0.005682521 |
| 3.706802186 | 0.000209893 | 0.006263581 |
| 3.687218587 | 0.000226719 | 0.006621232 |
| 3.68305502  | 0.000230455 | 0.006682799 |
| 3.678598527 | 0.000234519 | 0.006788645 |
| 3.627634429 | 0.00028603  | 0.007666621 |
| 3.620268183 | 0.000294298 | 0.007828704 |
| 3.581784339 | 0.000341255 | 0.00855973  |
| 3.524349422 | 0.000424524 | 0.009938076 |
| 3.50410056  | 0.000458152 | 0.010417968 |
| 3.494104363 | 0.000475655 | 0.010662727 |
| 3.488574648 | 0.000485603 | 0.010789164 |
| 3.487007378 | 0.000488458 | 0.010819243 |
| 3.460844975 | 0.000538483 | 0.011640064 |
| 3.435045892 | 0.000592453 | 0.012418824 |
| 3.431357203 | 0.000600569 | 0.012475085 |
| 3.431965394 | 0.000599224 | 0.012475085 |
| 3.425776776 | 0.000613044 | 0.012640566 |
| 3.42198408  | 0.00062166  | 0.012722317 |
| 3.401237933 | 0.000670814 | 0.013329385 |
| 3.387729777 | 0.000704737 | 0.013819405 |
| 3.380314991 | 0.000724028 | 0.014163852 |
| 3.371662984 | 0.000747158 | 0.014461211 |
| 3.370281618 | 0.000750914 | 0.014495313 |
| 3.363312102 | 0.000770132 | 0.014663786 |
| 3.316859731 | 0.000910353 | 0.016562589 |
| 3.287076919 | 0.001012332 | 0.017904528 |
| 3.286377735 | 0.001014848 | 0.017918239 |
| 3.215203739 | 0.00130352  | 0.021610777 |
| 3.21049308  | 0.001325075 | 0.021835792 |

## E4\_Severecontrol\_up

|             |             |             |
|-------------|-------------|-------------|
| 3.200278562 | 0.001372948 | 0.022466799 |
| 3.181725757 | 0.001464004 | 0.023355912 |
| 3.171292393 | 0.001517623 | 0.023883742 |
| 3.159061668 | 0.00158278  | 0.024484606 |
| 3.114417169 | 0.001843087 | 0.027130571 |
| 3.099606368 | 0.00193778  | 0.027923481 |
| 3.100036994 | 0.001934965 | 0.027923481 |
| 3.08978043  | 0.002003045 | 0.0285823   |
| 3.083783221 | 0.002043865 | 0.028943874 |
| 3.07695011  | 0.002091303 | 0.029459647 |
| 3.073277667 | 0.002117214 | 0.029599516 |
| 3.071513601 | 0.002129765 | 0.029645952 |
| 3.059869986 | 0.002214331 | 0.030286511 |
| 3.046872472 | 0.002312358 | 0.031182471 |
| 3.001321801 | 0.002688103 | 0.03465816  |
| 2.99430598  | 0.002750699 | 0.035306609 |
| 2.986577398 | 0.002821194 | 0.036006423 |
| 2.979744758 | 0.002884887 | 0.036311076 |
| 2.977734948 | 0.00290387  | 0.036522005 |
| 2.971128953 | 0.002967072 | 0.037033116 |
| 2.967856302 | 0.002998845 | 0.037259683 |
| 2.948202564 | 0.003196276 | 0.038830844 |
| 2.942118331 | 0.003259753 | 0.039109892 |
| 2.939826183 | 0.003283964 | 0.039316705 |
| 2.940230509 | 0.003279682 | 0.039316705 |
| 2.939372009 | 0.003288781 | 0.039343118 |
| 2.924489186 | 0.003450221 | 0.040668432 |
| 2.921045228 | 0.003488592 | 0.040957265 |
| 2.920297629 | 0.003496972 | 0.040997005 |
| 2.909025861 | 0.003625569 | 0.04178748  |
| 2.908035764 | 0.003637067 | 0.04178748  |
| 2.908492301 | 0.003631761 | 0.04178748  |
| 2.904544284 | 0.003677882 | 0.042036959 |
| 2.900165234 | 0.00372966  | 0.042363259 |
| 2.893381767 | 0.003811177 | 0.042981859 |
| 2.865087292 | 0.004168943 | 0.045532291 |
| 2.864286723 | 0.004179495 | 0.045610407 |
| 2.852949368 | 0.004331552 | 0.046685206 |
| 2.852907965 | 0.004332117 | 0.046685206 |
| 2.849215546 | 0.004382718 | 0.046954012 |
| 2.841057379 | 0.004496422 | 0.047450886 |
| 2.839051809 | 0.004524781 | 0.04757542  |
| 2.824286451 | 0.004738601 | 0.04900735  |
| 2.822934589 | 0.004758628 | 0.049152524 |
| 2.817012476 | 0.004847264 | 0.049879717 |

## E5\_Severemild\_down

| Gene Symbol | baseMean    | Log2 Fold Change | Log2 Fold Change | Standard Error |
|-------------|-------------|------------------|------------------|----------------|
| CXCR2       | 629.7174057 | -5.567911709     |                  | 0.699822775    |
| IFIT3       | 3605.123834 | -3.472844638     |                  | 0.455774093    |
| CAMP        | 49.96972698 | -7.842151623     |                  | 1.052482551    |
| HCAR2       | 59.68043435 | -5.377477747     |                  | 0.816827276    |
| IFIT1       | 1217.588628 | -2.738746907     |                  | 0.427663439    |
| SERPING1    | 42.50096064 | -5.064086102     |                  | 0.794269901    |
| PTGS2       | 90.51758404 | -5.449621078     |                  | 0.861109102    |
| OASL        | 1082.449113 | -1.995970826     |                  | 0.316634608    |
| MNDA        | 631.865444  | -4.202629022     |                  | 0.670591333    |
| ODF3B       | 58.46542163 | -3.046898011     |                  | 0.49241272     |
| DDX60       | 2125.363132 | -1.577877871     |                  | 0.259766439    |
| CLN3        | 354.0145452 | -1.078162023     |                  | 0.183677071    |
| OAS1        | 2194.713655 | -2.550724951     |                  | 0.435606678    |
| FCGR3B      | 475.0820338 | -4.478559052     |                  | 0.775740139    |
| IRF7        | 3435.397892 | -1.16529827      |                  | 0.201922659    |
| CSTA        | 34.06703067 | -4.435707988     |                  | 0.778418607    |
| PLN         | 21.13283833 | -4.869511661     |                  | 0.858011316    |
| G0S2        | 3817.968483 | -3.773735754     |                  | 0.677687873    |
| ROPN1L      | 44.38225853 | -4.203438536     |                  | 0.755565306    |
| IFITM3      | 1034.378419 | -3.234803328     |                  | 0.582708463    |
| FFAR2       | 151.0231199 | -5.238036373     |                  | 0.946384984    |
| HSPG2       | 53.28000988 | -3.189719619     |                  | 0.582677686    |
| HCAR3       | 35.05783439 | -4.654514745     |                  | 0.85389063     |
| KRT17       | 84.18372366 | -6.752359694     |                  | 1.256052405    |
| PCOLCE      | 18.61612188 | -3.746597506     |                  | 0.699180526    |
| CA14        | 42.8405366  | -2.380257413     |                  | 0.446393471    |
| EGR2        | 51.3445044  | -3.201700167     |                  | 0.600986407    |
| IL1B        | 1320.860097 | -4.00544588      |                  | 0.75646408     |
| IFIT2       | 2464.167709 | -2.196047527     |                  | 0.417866953    |
| CXCL10      | 227.2103408 | -5.758561038     |                  | 1.104620275    |
| ISG15       | 2982.132808 | -1.891319827     |                  | 0.370451684    |
| MTND1P23    | 70.87874013 | -3.420405225     |                  | 0.672197308    |
| IFI6        | 696.5677477 | -2.191454779     |                  | 0.432141611    |
| MAP3K8      | 345.6609621 | -1.172243476     |                  | 0.232272839    |
| TRIB1       | 174.793376  | -4.305153905     |                  | 0.866737673    |
| ICAM1       | 556.8863963 | -1.186631657     |                  | 0.239661873    |
| APOBEC3A    | 157.5080275 | -4.826020248     |                  | 0.976258377    |
| CCL4L2      | 675.0176905 | -3.938261288     |                  | 0.803808969    |
| IFITM2      | 7313.610277 | -1.184175275     |                  | 0.242638914    |
| LINC02362   | 29.1538642  | -2.75152893      |                  | 0.568102005    |
| FCN1        | 43.86356549 | -5.103099354     |                  | 1.054624908    |
| FAR2        | 98.50035616 | -1.984688824     |                  | 0.411062302    |
| MIR4435-2HG | 24.27018298 | -2.633983735     |                  | 0.547754386    |
| CMPK2       | 723.3093932 | -2.341562823     |                  | 0.490684364    |
| LCA5L       | 17.87354874 | -2.904512265     |                  | 0.611804217    |
| IGSF6       | 251.7777839 | -2.344952064     |                  | 0.495127267    |
| STX8P1      | 49.11849379 | -2.554959843     |                  | 0.541393171    |
| GBP5        | 2370.82128  | -1.080281054     |                  | 0.231565809    |
| PGLYRP1     | 102.8506169 | -4.601789155     |                  | 0.990214872    |
| SLC22A4     | 30.0576869  | -3.485551373     |                  | 0.74958829     |
| RN7SKP56    | 50.74306988 | -1.559778132     |                  | 0.339001825    |
| TNFRSF10C   | 112.301299  | -3.004133508     |                  | 0.654024585    |

## E5\_Severemild\_down

|                 |             |              |             |
|-----------------|-------------|--------------|-------------|
| RBM11           | 218.918178  | -1.500617377 | 0.327950115 |
| ENSG00000275457 | 94.36603531 | -1.03906218  | 0.227191944 |
| EPSTI1          | 1525.705963 | -1.403562327 | 0.307842806 |
| BCL2A1          | 2140.773381 | -1.729970426 | 0.379893777 |
| MAP1LC3A        | 77.96462088 | -1.085872692 | 0.239075787 |
| FTH1P20         | 67.09901719 | -2.545257129 | 0.562034656 |
| FCAR            | 98.82272551 | -3.402558457 | 0.755706623 |
| RELT            | 129.1337793 | -1.403754686 | 0.313173335 |
| HDX             | 45.26045416 | -4.239493998 | 0.945838294 |
| MIR3945HG       | 100.4715402 | -3.390836037 | 0.762434868 |
| OAS3            | 1511.41104  | -1.740632808 | 0.395347254 |
| ENTPD1          | 161.6813322 | -1.897746801 | 0.431266349 |
| CXCL8           | 1936.120761 | -3.345578006 | 0.759408564 |
| S100A9          | 9568.478417 | -3.256836177 | 0.74602805  |
| MS4A6A          | 109.8918406 | -3.778158729 | 0.878746515 |
| PLAUR           | 767.0370681 | -2.632466134 | 0.616261842 |
| KNSTRN          | 120.9345107 | -1.868813259 | 0.437490899 |
| CDKN1A          | 1161.504977 | -1.012797965 | 0.240348823 |
| RAB20           | 190.9020907 | -1.161828904 | 0.275206606 |
| ENSG00000236327 | 20.4530304  | -1.828715236 | 0.433900729 |
| LGALS9          | 92.6500076  | -1.644276056 | 0.393458042 |
| FCER1G          | 1127.387098 | -1.928988215 | 0.462696121 |
| HERC6           | 3385.041619 | -1.04502083  | 0.252103042 |
| MARCKS          | 163.6837947 | -3.135075274 | 0.758959431 |
| ZNF497          | 27.814855   | -1.805972568 | 0.437739634 |
| S100A8          | 9593.292256 | -3.177134241 | 0.775107453 |
| LY6E            | 3352.485593 | -1.309971441 | 0.319752468 |
| IL1R2           | 326.5681625 | -3.736838867 | 0.913976814 |
| CLIC4           | 523.6332293 | -1.469404922 | 0.360232659 |
| PPP1R37         | 48.13818622 | -1.191595224 | 0.29344305  |
| IFI44L          | 875.6184919 | -2.817803688 | 0.694231373 |
| QPCT            | 322.4840616 | -1.760335249 | 0.434006144 |
| PROK2           | 675.2526364 | -3.186982156 | 0.790974336 |
| RSAD2           | 1592.642841 | -2.05740604  | 0.511302929 |
| ENSG00000231412 | 57.05005752 | -4.007237743 | 0.999672348 |
| SGO1            | 63.55466888 | -1.882369133 | 0.470838079 |
| SUSD4           | 396.535116  | -1.447201032 | 0.362953681 |
| DSE             | 120.0179541 | -1.719902499 | 0.431673323 |
| RASAL1          | 82.08535453 | -2.76556674  | 0.696680515 |
| IQCD            | 43.51734151 | -1.999231475 | 0.503846001 |
| FPR1            | 917.8355767 | -3.335078246 | 0.839626198 |
| LAMP3           | 508.219472  | -2.786839344 | 0.703978676 |
| TYROBP          | 388.177463  | -1.580994496 | 0.400702585 |
| SLC29A2         | 333.8480934 | -1.020596548 | 0.258648424 |
| MSRB1           | 547.5923717 | -1.147985023 | 0.291444284 |
| MX1             | 11393.88332 | -1.306038521 | 0.334383971 |
| IL1RN           | 3867.447598 | -3.345373775 | 0.857587774 |
| PPIAP30         | 18.67033225 | -2.374572479 | 0.609920101 |
| CCL2            | 90.78152398 | -3.163929363 | 0.815276487 |
| LST1            | 316.1564233 | -1.262604089 | 0.325362988 |
| ENSG00000248466 | 54.68732262 | -1.946358363 | 0.502036024 |
| TNF             | 205.4232075 | -1.423951591 | 0.367423719 |
| CLEC4E          | 182.702793  | -3.670420473 | 0.947758574 |

## E5\_Severemild\_down

|                 |             |              |             |
|-----------------|-------------|--------------|-------------|
| CLEC4D          | 99.21872445 | -3.931417528 | 1.016593211 |
| ZNF32-AS2       | 27.57941859 | -1.820494108 | 0.474922577 |
| OSM             | 539.0644902 | -2.836441604 | 0.743411836 |
| CREB5           | 61.4306204  | -3.932435196 | 1.030446469 |
| SLC15A3         | 140.3381828 | -1.336923477 | 0.353275694 |
| ENSG00000231731 | 20.21746886 | -2.188071135 | 0.578109747 |
| MXD1            | 598.8879023 | -1.210116156 | 0.320323716 |
| ARL11           | 133.2770147 | -1.949188828 | 0.516425362 |
| IRF8            | 214.0678818 | -1.181954278 | 0.313483886 |
| CCL4            | 1375.609492 | -2.322617596 | 0.616218349 |
| S100A12         | 1156.796903 | -3.296895611 | 0.877937082 |
| ENSG00000264577 | 28.07181034 | -1.992970815 | 0.531793119 |
| SRC             | 49.53591385 | -3.45670824  | 0.931276326 |
| FOS             | 1256.46621  | -1.659836652 | 0.447480227 |
| NQO1            | 65.96716858 | -1.988133001 | 0.536977663 |
| HEXIM2          | 43.58752026 | -1.372775815 | 0.372828257 |
| TNFAIP6         | 196.365989  | -3.165472282 | 0.860102047 |
| CCRL2           | 100.298582  | -3.379980839 | 0.922150348 |
| LINC00381       | 64.45284013 | -1.47843386  | 0.404953222 |
| MKRN3           | 79.40072162 | -1.073078891 | 0.295100277 |
| ENSG00000286177 | 130.2384159 | -1.182819036 | 0.32559562  |
| HERC5           | 1916.256722 | -1.099029716 | 0.302697343 |
| USF1            | 67.05635589 | -1.105302948 | 0.304698622 |
| SIK2            | 111.0369327 | -1.182646123 | 0.327331862 |
| FAM32BP         | 19.76812123 | -2.145821797 | 0.597938655 |
| ENSG00000256712 | 20.56810458 | -2.283134475 | 0.638809483 |
| ARG1            | 113.1206804 | -3.543561614 | 0.994545132 |
| PIWIL4          | 64.52576222 | -2.344919438 | 0.659588474 |
| SPI1            | 311.9736161 | -3.017734908 | 0.851844278 |
| CEACAM1         | 108.8392111 | -1.598914475 | 0.452027452 |
| CCL3            | 317.0316481 | -2.459687057 | 0.697819541 |
| TMEM9B-AS1      | 73.72573992 | -1.04831054  | 0.299416633 |
| GSEC            | 83.17236226 | -1.978853167 | 0.56662604  |
| ARG2            | 167.8412974 | -1.048995809 | 0.300953353 |
| TICAM2-AS1      | 54.00517657 | -1.237806325 | 0.355132084 |
| RAB31           | 236.2933872 | -2.932955602 | 0.843048734 |
| PRDM11          | 65.70216339 | -1.250160201 | 0.361594242 |
| SEC14L1P1       | 147.1646981 | -1.238526054 | 0.358653986 |
| MIR223HG        | 92.97056282 | -2.798978508 | 0.813075559 |
| PLEK            | 1520.862432 | -1.86790584  | 0.544133339 |
| CHRNA6          | 546.7235358 | -1.602017424 | 0.467358875 |
| GMPR            | 38.02474086 | -1.859555398 | 0.547022644 |
| MPP7-DT         | 31.04920609 | -1.655591916 | 0.491736658 |
| PELATON         | 234.2426908 | -2.525704167 | 0.751170388 |
| KRT23           | 88.96312809 | -3.792459334 | 1.128256211 |
| SETD1A          | 91.96705022 | -1.211580191 | 0.360638226 |
| S100P           | 154.0289929 | -1.914339464 | 0.570960919 |
| C5AR1           | 118.4094293 | -2.221239455 | 0.663874065 |
| TRAJ50          | 28.48312411 | -1.377977448 | 0.411786097 |
| FZD3            | 205.5605213 | -1.20867626  | 0.361898243 |
| GLT1D1          | 78.65493194 | -3.771578901 | 1.131932019 |
| CEBPD           | 456.8816403 | -1.055720812 | 0.318895324 |
| LILRA6          | 44.47468343 | -2.952166109 | 0.893212542 |

## E5\_Severemild\_down

|                        |             |              |             |
|------------------------|-------------|--------------|-------------|
| TNFSF13B               | 671.0744307 | -1.07060247  | 0.324333971 |
| SEMA6A-AS1             | 23.29218374 | -1.788089808 | 0.541609165 |
| BST1                   | 66.58053107 | -2.717720073 | 0.827320602 |
| STXBP2                 | 238.3035346 | -1.301140259 | 0.398234622 |
| ARHGEF40               | 39.37301328 | -2.460270697 | 0.752810157 |
| SPATS2L                | 225.2742249 | -1.637433778 | 0.501377243 |
| SGPP2                  | 33.7654196  | -2.24116566  | 0.686736224 |
| RNU6-565P              | 16.72714067 | -1.133009443 | 0.347748773 |
| JUP                    | 42.26280951 | -3.141208397 | 0.964791536 |
| ANKRD22                | 52.02735201 | -2.745915303 | 0.844516976 |
| PSPH                   | 207.1493719 | -1.102623294 | 0.339856894 |
| NEFM                   | 20.96078571 | -2.156196859 | 0.665827082 |
| P2RY14                 | 66.04892358 | -2.895736857 | 0.895389409 |
| FCGR2A                 | 253.4524102 | -2.778450822 | 0.861275542 |
| ENSG00000225889        | 219.2522575 | -1.423454462 | 0.442807513 |
| TESC                   | 23.05701598 | -2.876519392 | 0.895338354 |
| ENSG00000286082        | 30.06633683 | -1.64813996  | 0.515291334 |
| ATAT1                  | 72.45138425 | -1.425326114 | 0.449799025 |
| KCTD11                 | 54.93620876 | -1.984727136 | 0.626367827 |
| ACRBP                  | 19.16550104 | -2.814304018 | 0.888626071 |
| ENSG00000259922        | 26.25936426 | -2.612905141 | 0.8266225   |
| KCNJ15                 | 99.89282645 | -2.521542664 | 0.80293719  |
| CXCR1                  | 211.6753873 | -3.48863598  | 1.111124167 |
| ENSG00000249679        | 18.42592343 | -2.63390999  | 0.840294571 |
| PLSCR1                 | 1181.102649 | -1.044226557 | 0.335235474 |
| ZNF396                 | 56.69809566 | -2.227962986 | 0.715867026 |
| KYNU                   | 44.12538352 | -2.403835482 | 0.776350891 |
| SEMA4A                 | 81.05040441 | -3.486793646 | 1.127170708 |
| CD24                   | 24.35951479 | -2.935626705 | 0.949902164 |
| CD248                  | 206.5678651 | -1.470446029 | 0.476391656 |
| LAG3                   | 216.5445715 | -1.045075681 | 0.339293005 |
| TREM1                  | 186.9848188 | -3.062947133 | 0.994525139 |
| FKBP2                  | 18.82292571 | -1.170534304 | 0.381231298 |
| GK                     | 310.093639  | -1.199797832 | 0.391826708 |
| MSMB                   | 77.72690661 | -2.750677691 | 0.898532803 |
| CST3                   | 48.63196398 | -1.871060846 | 0.611986203 |
| NCF4                   | 215.8321047 | -2.500207231 | 0.819489893 |
| CCL3L1                 | 417.5164573 | -2.76525102  | 0.906837378 |
| PEAK3                  | 24.89565897 | -1.693644484 | 0.556227836 |
| FADS3                  | 158.5484369 | -1.002733488 | 0.330338238 |
| LYZ                    | 114.8260965 | -2.011880213 | 0.663273619 |
| EPM2A                  | 276.8626909 | -1.024516684 | 0.338073075 |
| RSPH9                  | 59.57246113 | -1.057925639 | 0.349929458 |
| FCGR1A                 | 48.79003933 | -3.010190037 | 0.997160603 |
| CXCL1                  | 248.4154325 | -2.639942576 | 0.876628738 |
| RHEBL1                 | 47.26426593 | -1.468600935 | 0.487810057 |
| CD101                  | 205.277317  | -1.424045628 | 0.474450738 |
| STAG3L5P-PVRIG2P-PILRB | 17.69179817 | -1.012140423 | 0.337152951 |

E5\_Severemild\_down

| Test Statistic Value | p             | Adjusted P value |
|----------------------|---------------|------------------|
| -7.956173916         | 1.77E-15      | 2.59E-11         |
| -7.619662223         | 2.54E-14      | 1.86E-10         |
| -7.451098944         | 9.26E-14      | 4.5E-10          |
| -6.583371914         | 4.6E-11       | 0.000000168      |
| -6.403977186         | 1.51E-10      | 0.000000315      |
| -6.375774904         | 1.82E-10      | 0.000000332      |
| -6.328606984         | 2.47E-10      | 0.000000401      |
| -6.303703944         | 2.91E-10      | 0.000000424      |
| -6.267049416         | 3.68E-10      | 0.000000488      |
| -6.187691518         | 6.11E-10      | 0.000000742      |
| -6.074217575         | 0.00000000125 | 0.0000013        |
| -5.869878136         | 0.00000000436 | 0.00000424       |
| -5.855568978         | 0.00000000475 | 0.00000433       |
| -5.773272293         | 0.00000000777 | 0.00000639       |
| -5.771012904         | 0.00000000788 | 0.00000639       |
| -5.69835812          | 0.0000000121  | 0.00000929       |
| -5.675346667         | 0.0000000138  | 0.0000101        |
| -5.568545498         | 0.0000000257  | 0.0000168        |
| -5.563302741         | 0.0000000265  | 0.0000168        |
| -5.551323743         | 0.0000000284  | 0.0000172        |
| -5.534783902         | 0.0000000312  | 0.0000182        |
| -5.474243645         | 0.0000000439  | 0.0000237        |
| -5.450949546         | 0.0000000501  | 0.0000261        |
| -5.375858259         | 0.0000000762  | 0.0000359        |
| -5.358555289         | 0.0000000839  | 0.0000372        |
| -5.332195843         | 0.000000097   | 0.0000405        |
| -5.32740862          | 0.0000000996  | 0.0000405        |
| -5.294958457         | 0.000000119   | 0.0000469        |
| -5.255374969         | 0.000000148   | 0.0000567        |
| -5.213158916         | 0.000000186   | 0.0000694        |
| -5.105442653         | 0.00000033    | 0.000109409      |
| -5.088394705         | 0.000000361   | 0.000115136      |
| -5.07114965          | 0.000000395   | 0.000122723      |
| -5.046838374         | 0.000000449   | 0.000136504      |
| -4.967078321         | 0.00000068    | 0.000190667      |
| -4.951274225         | 0.000000737   | 0.000199164      |
| -4.943384213         | 0.000000768   | 0.000203629      |
| -4.899499062         | 0.000000961   | 0.000241644      |
| -4.880401312         | 0.00000106    | 0.000257388      |
| -4.843371273         | 0.00000128    | 0.000290952      |
| -4.838781365         | 0.00000131    | 0.000293171      |
| -4.82819469          | 0.00000138    | 0.000304507      |
| -4.808694928         | 0.00000152    | 0.000321165      |
| -4.772034722         | 0.00000182    | 0.000364423      |
| -4.747453819         | 0.00000206    | 0.000395372      |
| -4.736059236         | 0.00000218    | 0.000407527      |
| -4.71923175          | 0.00000237    | 0.00043166       |
| -4.665114677         | 0.00000308    | 0.000542083      |
| -4.647263222         | 0.00000336    | 0.000570535      |
| -4.649954409         | 0.00000332    | 0.000570535      |
| -4.601090665         | 0.0000042     | 0.000659214      |
| -4.593303639         | 0.00000436    | 0.000677029      |

## E5\_Severemild\_down

|              |             |             |
|--------------|-------------|-------------|
| -4.57574889  | 0.00000475  | 0.000728612 |
| -4.573499218 | 0.0000048   | 0.000728811 |
| -4.559347502 | 0.00000513  | 0.000763775 |
| -4.553826699 | 0.00000527  | 0.000776187 |
| -4.541960134 | 0.00000557  | 0.000805866 |
| -4.528648012 | 0.00000594  | 0.000848939 |
| -4.502485953 | 0.00000672  | 0.000942028 |
| -4.482356983 | 0.00000738  | 0.000988388 |
| -4.482260893 | 0.00000739  | 0.000988388 |
| -4.447377969 | 0.00000869  | 0.001122099 |
| -4.402794737 | 0.0000107   | 0.001260886 |
| -4.400405465 | 0.0000108   | 0.001260886 |
| -4.40550471  | 0.0000106   | 0.001260886 |
| -4.36556799  | 0.0000127   | 0.001437586 |
| -4.299486445 | 0.0000171   | 0.001783723 |
| -4.271668234 | 0.0000194   | 0.0019253   |
| -4.271662025 | 0.0000194   | 0.0019253   |
| -4.213866961 | 0.0000251   | 0.002309228 |
| -4.221660665 | 0.0000243   | 0.002309228 |
| -4.2145936   | 0.000025    | 0.002309228 |
| -4.179037867 | 0.0000293   | 0.002511924 |
| -4.169017476 | 0.0000306   | 0.002594413 |
| -4.145213095 | 0.0000339   | 0.002782166 |
| -4.130754747 | 0.0000362   | 0.002908649 |
| -4.125677525 | 0.000037    | 0.002946454 |
| -4.098959738 | 0.0000415   | 0.003169512 |
| -4.096829803 | 0.0000419   | 0.003182143 |
| -4.088548865 | 0.0000434   | 0.003280791 |
| -4.079044155 | 0.0000452   | 0.003400218 |
| -4.060737589 | 0.0000489   | 0.003622162 |
| -4.058882667 | 0.0000493   | 0.003632611 |
| -4.056014584 | 0.0000499   | 0.003659002 |
| -4.029185286 | 0.000056    | 0.003944162 |
| -4.023849508 | 0.0000573   | 0.003993574 |
| -4.008551154 | 0.0000611   | 0.004183678 |
| -3.997911843 | 0.0000639   | 0.004335646 |
| -3.987288479 | 0.0000668   | 0.004492577 |
| -3.984268671 | 0.0000677   | 0.004529214 |
| -3.969634116 | 0.000072    | 0.004700003 |
| -3.967941538 | 0.0000725   | 0.004700003 |
| -3.972098838 | 0.0000712   | 0.004700003 |
| -3.958698521 | 0.0000754   | 0.004859289 |
| -3.945556016 | 0.0000796   | 0.00495404  |
| -3.945883495 | 0.0000795   | 0.00495404  |
| -3.938951918 | 0.0000818   | 0.004994877 |
| -3.905804799 | 0.0000939   | 0.005479595 |
| -3.900911227 | 0.0000958   | 0.005525261 |
| -3.893251713 | 0.0000989   | 0.005658007 |
| -3.880805364 | 0.000104111 | 0.005891252 |
| -3.880601473 | 0.000104198 | 0.005891252 |
| -3.876929683 | 0.000105783 | 0.005957743 |
| -3.875502638 | 0.000106405 | 0.00596972  |
| -3.872737818 | 0.00010762  | 0.006014739 |

## E5\_Severemild\_down

|              |             |             |
|--------------|-------------|-------------|
| -3.867247474 | 0.000110071 | 0.006104949 |
| -3.833243979 | 0.000126464 | 0.006832357 |
| -3.815437776 | 0.000135942 | 0.007210843 |
| -3.816244042 | 0.000135498 | 0.007210843 |
| -3.784363032 | 0.000154103 | 0.007805197 |
| -3.784871551 | 0.000153788 | 0.007805197 |
| -3.777791321 | 0.000158225 | 0.007986275 |
| -3.774386332 | 0.000160402 | 0.008040496 |
| -3.770382887 | 0.000162997 | 0.008142607 |
| -3.769147092 | 0.000163806 | 0.008155096 |
| -3.755275496 | 0.000173151 | 0.008504217 |
| -3.747643107 | 0.000178504 | 0.008650624 |
| -3.711796534 | 0.000205793 | 0.0096215   |
| -3.709296078 | 0.000207836 | 0.00965512  |
| -3.702450099 | 0.000213527 | 0.009814601 |
| -3.682059473 | 0.000231357 | 0.01044833  |
| -3.680345015 | 0.000232919 | 0.010486369 |
| -3.665325125 | 0.000247025 | 0.010985815 |
| -3.650875661 | 0.000261348 | 0.01148277  |
| -3.636319493 | 0.000276561 | 0.011886826 |
| -3.63278547  | 0.000280378 | 0.011934968 |
| -3.630787456 | 0.000282558 | 0.011981601 |
| -3.627528539 | 0.000286147 | 0.012098633 |
| -3.612988108 | 0.000302689 | 0.012381306 |
| -3.588698908 | 0.000332332 | 0.013177899 |
| -3.574045996 | 0.000351507 | 0.013673159 |
| -3.562997293 | 0.000366644 | 0.014000635 |
| -3.555124948 | 0.0003778   | 0.014270801 |
| -3.542589868 | 0.000396218 | 0.014669131 |
| -3.537206577 | 0.000404383 | 0.014783805 |
| -3.524818254 | 0.000423773 | 0.015225574 |
| -3.501176701 | 0.000463209 | 0.016126072 |
| -3.492344204 | 0.000478801 | 0.016433571 |
| -3.485576082 | 0.000491079 | 0.016664871 |
| -3.485481549 | 0.000491252 | 0.016664871 |
| -3.47898702  | 0.000503313 | 0.016994968 |
| -3.457356499 | 0.000545503 | 0.018002823 |
| -3.453261647 | 0.000553852 | 0.018080179 |
| -3.442458055 | 0.000576453 | 0.018480711 |
| -3.432809032 | 0.000597363 | 0.019067242 |
| -3.427809999 | 0.000608471 | 0.019295149 |
| -3.399412106 | 0.000675309 | 0.020745274 |
| -3.366826307 | 0.000760386 | 0.022498469 |
| -3.362358535 | 0.000772797 | 0.022794892 |
| -3.361345851 | 0.000775636 | 0.022810903 |
| -3.359544561 | 0.000780711 | 0.02288751  |
| -3.352837994 | 0.000799875 | 0.023242586 |
| -3.345874726 | 0.000820234 | 0.023414403 |
| -3.346342817 | 0.000818851 | 0.023414403 |
| -3.339823513 | 0.000838316 | 0.023837275 |
| -3.33198358  | 0.000862293 | 0.024188989 |
| -3.310555954 | 0.000931108 | 0.025593484 |
| -3.305110454 | 0.00094939  | 0.025982643 |

## E5\_Severemild\_down

|              |             |             |
|--------------|-------------|-------------|
| -3.300926094 | 0.000963663 | 0.026225647 |
| -3.301439346 | 0.000961901 | 0.026225647 |
| -3.284966603 | 0.001019947 | 0.027442846 |
| -3.267270566 | 0.001085898 | 0.028643762 |
| -3.268115706 | 0.001082661 | 0.028643762 |
| -3.265871758 | 0.001091277 | 0.028733667 |
| -3.2635029   | 0.001100441 | 0.028773475 |
| -3.258126358 | 0.001121505 | 0.029057526 |
| -3.255841578 | 0.001130568 | 0.029137098 |
| -3.251462531 | 0.001148129 | 0.029433671 |
| -3.244375247 | 0.001177086 | 0.029861128 |
| -3.238373622 | 0.001202133 | 0.030285854 |
| -3.23405306  | 0.001220468 | 0.030470581 |
| -3.225972046 | 0.001255456 | 0.030882528 |
| -3.214612266 | 0.001306208 | 0.031862307 |
| -3.21277356  | 0.001314599 | 0.031906912 |
| -3.198462406 | 0.001381625 | 0.033147649 |
| -3.168806589 | 0.001530662 | 0.035976538 |
| -3.168628801 | 0.001531599 | 0.035976538 |
| -3.167028414 | 0.001540053 | 0.035992383 |
| -3.160941228 | 0.001572602 | 0.036411983 |
| -3.140398398 | 0.001687182 | 0.037872475 |
| -3.139735489 | 0.001691004 | 0.037872475 |
| -3.134507922 | 0.001721426 | 0.038336552 |
| -3.114904707 | 0.001840043 | 0.040001064 |
| -3.112258148 | 0.001856621 | 0.04018179  |
| -3.096326044 | 0.001959348 | 0.041785099 |
| -3.093403352 | 0.00197875  | 0.04190597  |
| -3.090451645 | 0.001998523 | 0.041967967 |
| -3.086632629 | 0.002024376 | 0.042185107 |
| -3.080156876 | 0.002068916 | 0.042776733 |
| -3.079808656 | 0.002071336 | 0.042776733 |
| -3.070404532 | 0.00213769  | 0.04367295  |
| -3.062062404 | 0.002198176 | 0.044349649 |
| -3.061299134 | 0.002203788 | 0.044401458 |
| -3.057357892 | 0.002232975 | 0.044679287 |
| -3.050931139 | 0.002281329 | 0.045248253 |
| -3.049335072 | 0.002293485 | 0.04527073  |
| -3.044875453 | 0.002327767 | 0.045582204 |
| -3.035475079 | 0.002401571 | 0.046399618 |
| -3.033258305 | 0.002419284 | 0.046503251 |
| -3.030459267 | 0.002441821 | 0.046743892 |
| -3.023254013 | 0.002500722 | 0.047746123 |
| -3.0187615   | 0.002538103 | 0.04808221  |
| -3.011471631 | 0.002599847 | 0.048759772 |
| -3.010599955 | 0.002607321 | 0.048759772 |
| -3.00146151  | 0.00268687  | 0.049758836 |
| -3.002021545 | 0.002681932 | 0.049758836 |

## E6\_Severemild\_up

| Gene Symbol     | baseMean    | Log2 Fold Change | Log2 Fold Change | Standard Error |
|-----------------|-------------|------------------|------------------|----------------|
| TMEM117         | 134.9843959 | 1.803548366      |                  | 0.326693309    |
| CPLANE1         | 167.1897097 | 1.269961168      |                  | 0.264512652    |
| RNF125          | 1496.490537 | 1.00151153       |                  | 0.212024144    |
| KRT18P61        | 70.28475135 | 1.728844545      |                  | 0.372661749    |
| ITGA10          | 31.98882325 | 2.820969841      |                  | 0.629763229    |
| NKILA           | 91.31745599 | 1.776230027      |                  | 0.401367815    |
| MYH7B           | 36.09702946 | 1.901760679      |                  | 0.441071994    |
| SH3RF3-AS1      | 23.87076204 | 1.856740811      |                  | 0.434642239    |
| CCDC15          | 117.4520435 | 1.642654931      |                  | 0.389877211    |
| LINGO3          | 877.3594431 | 1.37545035       |                  | 0.330217267    |
| ADAMTS7P1       | 26.4892976  | 2.261534104      |                  | 0.54403461     |
| CATSPER2        | 58.13373901 | 1.137181946      |                  | 0.279513019    |
| GGCTP1          | 61.44603278 | 1.276960754      |                  | 0.320821959    |
| XPC-AS1         | 24.83277022 | 1.7157425        |                  | 0.433593994    |
| PITPNM2         | 106.1192184 | 1.276357264      |                  | 0.322848886    |
| FEZ2            | 74.7571664  | 1.255862912      |                  | 0.318426541    |
| GTF2IP20        | 96.02829245 | 1.611063249      |                  | 0.412313593    |
| UCKL1-AS1       | 66.24737322 | 1.64335095       |                  | 0.427630191    |
| GUSBP9          | 24.57938736 | 1.166667307      |                  | 0.308248542    |
| GINS2           | 35.85715811 | 2.89795187       |                  | 0.772870709    |
| ENSG00000255321 | 26.70536582 | 1.454445856      |                  | 0.389084746    |
| SACS            | 206.2058276 | 1.109094818      |                  | 0.299255616    |
| ENSG00000273729 | 79.87916808 | 1.270970626      |                  | 0.344943994    |
| SNX18           | 118.6789883 | 1.294837808      |                  | 0.356026196    |
| BDNF-AS         | 175.6815437 | 1.153017026      |                  | 0.326861395    |
| LINC00539       | 22.69044626 | 2.253280829      |                  | 0.639817234    |
| DIAPH1-AS1      | 36.95808903 | 2.161860149      |                  | 0.61699173     |
| ENSG00000267934 | 68.42274201 | 1.50695897       |                  | 0.431350393    |
| DGKH            | 42.61004333 | 1.864401752      |                  | 0.541176348    |
| DHDDS-AS1       | 27.48975403 | 1.522376004      |                  | 0.445351927    |
| ENSG00000247011 | 295.245182  | 1.088533024      |                  | 0.31947636     |
| RPL12P44        | 29.93091642 | 1.786076247      |                  | 0.524746367    |
| ENSG00000287855 | 67.88490651 | 1.274622348      |                  | 0.374990237    |
| BEX1            | 21.53232817 | 1.268552588      |                  | 0.373574814    |
| CACNB2          | 154.9150386 | 1.042148622      |                  | 0.307443797    |
| ENSG00000228061 | 29.2780642  | 1.205810548      |                  | 0.357930784    |
| PTTG2           | 20.18065499 | 1.844674257      |                  | 0.548667758    |
| TRBV6-4         | 41.08466161 | 1.344418167      |                  | 0.400797721    |
| ACVR2B          | 96.08427973 | 1.296964763      |                  | 0.387530844    |
| KIF9            | 36.97228347 | 1.017512432      |                  | 0.303787747    |
| TMEM256P2       | 29.0081528  | 1.647826693      |                  | 0.493194253    |
| FGGY            | 102.5428454 | 1.328720847      |                  | 0.398925366    |
| APOBR           | 28.06584414 | 1.911842848      |                  | 0.577528003    |
| ENSG00000267277 | 31.21149266 | 1.473622898      |                  | 0.445398982    |
| ENSG00000258337 | 21.03379245 | 1.406276465      |                  | 0.429689954    |
| LRRC29          | 131.1179312 | 1.035092487      |                  | 0.3164948      |
| GAPDHP42        | 40.06683206 | 1.980669342      |                  | 0.608104652    |
| ENSG00000259556 | 29.40101243 | 1.204184024      |                  | 0.371130384    |
| ENSG00000249318 | 57.67252833 | 1.211696026      |                  | 0.375011377    |
| ENSG00000279738 | 71.48096202 | 1.082776597      |                  | 0.337253956    |
| SMG1-DT         | 53.30683951 | 1.266134604      |                  | 0.394712522    |
| RAB11FIP1P1     | 22.27170318 | 1.816176942      |                  | 0.566909442    |

## E6\_Severemild\_up

|                 |             |             |             |
|-----------------|-------------|-------------|-------------|
| ENSG00000248787 | 26.10273085 | 1.244937959 | 0.394228393 |
| ZNF233          | 62.92777479 | 1.515641021 | 0.482776662 |
| HIP1            | 49.25305042 | 1.417396105 | 0.451213436 |
| MIRLET7A1HG     | 55.49604042 | 1.135737059 | 0.362823762 |
| ENSG00000287580 | 18.92878633 | 1.482887769 | 0.474306863 |
| DDI2            | 347.1114114 | 1.041700815 | 0.334667686 |
| DERA            | 368.8805223 | 1.070374756 | 0.344681455 |
| SLC5A5          | 92.88425034 | 1.715067915 | 0.554426818 |
| PARVA           | 19.75028127 | 2.759412293 | 0.892603853 |
| C21orf62        | 20.26991305 | 1.750627289 | 0.566572065 |
| BBS5            | 16.33610156 | 1.659313858 | 0.537220902 |
| ENSG00000231128 | 28.24101511 | 1.501203528 | 0.488864599 |
| BCL11A          | 79.36646405 | 1.663161936 | 0.542062443 |
| XYLB            | 18.52306146 | 1.815646942 | 0.591960982 |
| ZNF844          | 63.37520545 | 1.150497182 | 0.37766119  |
| ENSG00000288848 | 39.64365358 | 1.373964878 | 0.455039168 |
| LSM11           | 84.67367823 | 1.373142245 | 0.455640337 |
| ENSG00000258526 | 23.07381422 | 1.635891551 | 0.543446961 |
| SPDYE3          | 23.51920656 | 1.509572097 | 0.503031992 |

E6\_Severemild\_up

| Test Statistic Value | p            | Adjusted P value |
|----------------------|--------------|------------------|
| 5.520616172          | 0.0000000338 | 0.000019         |
| 4.801135815          | 0.00000158   | 0.000325501      |
| 4.723573045          | 0.00000232   | 0.000427891      |
| 4.63917896           | 0.0000035    | 0.000574727      |
| 4.479413389          | 0.00000748   | 0.000992559      |
| 4.425442104          | 0.00000962   | 0.00120608       |
| 4.311678604          | 0.0000162    | 0.001725268      |
| 4.271883044          | 0.0000194    | 0.0019253        |
| 4.213262236          | 0.0000252    | 0.002309228      |
| 4.165288996          | 0.0000311    | 0.002621937      |
| 4.156967335          | 0.0000323    | 0.002667871      |
| 4.068440005          | 0.0000473    | 0.003540448      |
| 3.980278531          | 0.0000688    | 0.004584885      |
| 3.95702552           | 0.0000759    | 0.004859289      |
| 3.953420069          | 0.000077     | 0.004883108      |
| 3.943964309          | 0.0000801    | 0.00495404       |
| 3.907373601          | 0.0000933    | 0.005479595      |
| 3.842925463          | 0.000121576  | 0.006647773      |
| 3.784826685          | 0.000153816  | 0.007805197      |
| 3.749594641          | 0.000177121  | 0.008640999      |
| 3.738120992          | 0.000185401  | 0.008925546      |
| 3.706178795          | 0.00021041   | 0.009743643      |
| 3.68457097           | 0.000229088  | 0.01037798       |
| 3.636917238          | 0.000275921  | 0.011886826      |
| 3.527541166          | 0.000419439  | 0.01514443       |
| 3.521757009          | 0.000428697  | 0.015364623      |
| 3.503872167          | 0.000458545  | 0.016078851      |
| 3.493584317          | 0.000476582  | 0.016419792      |
| 3.445090975          | 0.000570867  | 0.018382429      |
| 3.418366266          | 0.000629983  | 0.019862836      |
| 3.407241231          | 0.000656231  | 0.020367252      |
| 3.403694353          | 0.000664811  | 0.020502321      |
| 3.399081425          | 0.000676126  | 0.020745274      |
| 3.395712291          | 0.000684503  | 0.02093258       |
| 3.389720762          | 0.000699639  | 0.021350684      |
| 3.368837223          | 0.00075486   | 0.022386576      |
| 3.362097063          | 0.000773529  | 0.022794892      |
| 3.354355818          | 0.0007955    | 0.023242586      |
| 3.346739446          | 0.00081768   | 0.023414403      |
| 3.349418933          | 0.000809812  | 0.023414403      |
| 3.34113117           | 0.000834378  | 0.023771623      |
| 3.330750463          | 0.000866122  | 0.024227075      |
| 3.310389864          | 0.000931661  | 0.025593484      |
| 3.308545727          | 0.000937819  | 0.025714213      |
| 3.272770168          | 0.00106499   | 0.028348567      |
| 3.270488128          | 0.00107362   | 0.028526233      |
| 3.257119209          | 0.001125492  | 0.029057602      |
| 3.244638743          | 0.001175997  | 0.029861128      |
| 3.231091377          | 0.001233185  | 0.030488934      |
| 3.21056752           | 0.001324731  | 0.032046198      |
| 3.207738627          | 0.00133783   | 0.032309486      |
| 3.203645607          | 0.001356994  | 0.032679308      |

E6\_Severemild\_up

|             |             |             |
|-------------|-------------|-------------|
| 3.157910441 | 0.001589044 | 0.036618294 |
| 3.13942479  | 0.001692799 | 0.037872475 |
| 3.141298537 | 0.001682005 | 0.037872475 |
| 3.130271985 | 0.001746445 | 0.038616999 |
| 3.12643119  | 0.001769419 | 0.03886442  |
| 3.112642361 | 0.001854206 | 0.04018179  |
| 3.105402805 | 0.001900201 | 0.040942727 |
| 3.093407209 | 0.001978724 | 0.04190597  |
| 3.091418757 | 0.001992025 | 0.041930255 |
| 3.089858106 | 0.002002521 | 0.041969511 |
| 3.088699363 | 0.002010348 | 0.042073085 |
| 3.070796149 | 0.002134889 | 0.04367295  |
| 3.068210971 | 0.002153445 | 0.043871936 |
| 3.067173338 | 0.002160935 | 0.04394756  |
| 3.046373874 | 0.002316196 | 0.045534172 |
| 3.019443105 | 0.002532399 | 0.048055934 |
| 3.013653827 | 0.002581221 | 0.048719094 |
| 3.010213819 | 0.002610638 | 0.048759772 |
| 3.0009465   | 0.002691418 | 0.049758836 |

Pathway identifier

R-HSA-6783783  
R-HSA-168256  
R-HSA-1280215  
R-HSA-909733  
R-HSA-913531  
R-HSA-380108  
R-HSA-449147  
R-HSA-6785807  
R-HSA-6798695  
R-HSA-375276  
R-HSA-373076  
R-HSA-168249  
R-HSA-877300  
R-HSA-500792  
R-HSA-69895  
R-HSA-69560  
R-HSA-5660668  
R-HSA-418594  
R-HSA-6804116  
R-HSA-372790  
R-HSA-1169410  
R-HSA-8983711  
R-HSA-9031628  
R-HSA-380994  
R-HSA-8866911  
R-HSA-6791312  
R-HSA-381042  
R-HSA-3296197  
R-HSA-8941855  
R-HSA-9617828  
R-HSA-198725  
R-HSA-448706  
R-HSA-2559582  
R-HSA-9020702  
R-HSA-8934903  
R-HSA-6799990  
R-HSA-166520  
R-HSA-5668599  
R-HSA-388396  
R-HSA-69563  
R-HSA-69580  
R-HSA-5619110  
R-HSA-9661069  
R-HSA-9659787  
R-HSA-69615  
R-HSA-187037  
R-HSA-6803211  
R-HSA-391160  
R-HSA-416700  
R-HSA-9657689  
R-HSA-5619053  
R-HSA-9702518

E7\_severemild\_down\_reactome

R-HSA-1169408  
R-HSA-2559583  
R-HSA-5621481  
R-HSA-6803157  
R-HSA-69231  
R-HSA-69236  
R-HSA-166016  
R-HSA-9660826  
R-HSA-9664424  
R-HSA-3656535  
R-HSA-5602498  
R-HSA-166058  
R-HSA-168188  
R-HSA-5603041  
R-HSA-9725371  
R-HSA-168179  
R-HSA-181438  
R-HSA-9634638  
R-HSA-446652  
R-HSA-9703648  
R-HSA-5626978  
R-HSA-69200  
R-HSA-191650  
R-HSA-5205647  
R-HSA-5621480  
R-HSA-168928  
R-HSA-70635  
R-HSA-9703465  
R-HSA-75109  
R-HSA-3656534  
R-HSA-1566977  
R-HSA-3134963  
R-HSA-5620971  
R-HSA-381340  
R-HSA-9614085  
R-HSA-2559586  
R-HSA-9616222  
R-HSA-9687139  
R-HSA-549127  
R-HSA-5686938  
R-HSA-8849470  
R-HSA-75094  
R-HSA-168898  
R-HSA-936440  
R-HSA-163125  
R-HSA-168164  
R-HSA-9675126  
R-HSA-975155  
R-HSA-168181  
R-HSA-354192  
R-HSA-9619665  
R-HSA-427975  
R-HSA-3304351

E7\_severemild\_down\_reactome

R-HSA-5607764  
R-HSA-937061  
R-HSA-166166  
R-HSA-168138  
R-HSA-389356  
R-HSA-9768919  
R-HSA-162791  
R-HSA-9603381  
R-HSA-72200  
R-HSA-418886  
R-HSA-5602358  
R-HSA-5260271  
R-HSA-9682385  
R-HSA-3785653  
R-HSA-629597  
R-HSA-444473  
R-HSA-1253288  
R-HSA-9032500  
R-HSA-2025928  
R-HSA-450341  
R-HSA-2855086  
R-HSA-430116  
R-HSA-75072  
R-HSA-428542  
R-HSA-977225  
R-HSA-549132  
R-HSA-629594  
R-HSA-1236973  
R-HSA-2022923  
R-HSA-6809371  
R-HSA-9013973  
R-HSA-8876493  
R-HSA-9706019  
R-HSA-5357786  
R-HSA-75205  
R-HSA-9614399  
R-HSA-210990  
R-HSA-3214841  
R-HSA-114608  
R-HSA-8864260  
R-HSA-622323  
R-HSA-166662  
R-HSA-75035  
R-HSA-2172127  
R-HSA-76009  
R-HSA-1236978  
R-HSA-76002  
R-HSA-1236975  
R-HSA-3656237  
R-HSA-3656253  
R-HSA-75892  
R-HSA-879415  
R-HSA-9640463

E7\_severemild\_down\_reactome

R-HSA-198323  
R-HSA-76005  
R-HSA-975110  
R-HSA-181431  
R-HSA-622327  
R-HSA-2559584  
R-HSA-1475029  
R-HSA-5676594  
R-HSA-6788467  
R-HSA-2029481  
R-HSA-5684264  
R-HSA-1433559  
R-HSA-417957  
R-HSA-381119  
R-HSA-9634815  
R-HSA-166658  
R-HSA-177929  
R-HSA-418885  
R-HSA-171007  
R-HSA-111447  
R-HSA-2173791  
R-HSA-9755779  
R-HSA-9735871  
R-HSA-5676934  
R-HSA-1295596  
R-HSA-975871  
R-HSA-168142  
R-HSA-168176  
R-HSA-187577  
R-HSA-354194  
R-HSA-936964  
R-HSA-918233  
R-HSA-399997  
R-HSA-9754706  
R-HSA-9009391  
R-HSA-3560783  
R-HSA-4420332  
R-HSA-6804114  
R-HSA-9671793  
R-HSA-9651496  
R-HSA-8979227  
R-HSA-9725370  
R-HSA-9700206  
R-HSA-372708  
R-HSA-3560801  
R-HSA-5205685  
R-HSA-2142770  
R-HSA-3229121  
R-HSA-975138  
R-HSA-8873719  
R-HSA-8878159  
R-HSA-3928664  
R-HSA-180292

E7\_severemild\_down\_reactome

R-HSA-418038  
R-HSA-450294  
R-HSA-69620  
R-HSA-3322077  
R-HSA-2243919  
R-HSA-449836  
R-HSA-373755  
R-HSA-389513  
R-HSA-977347  
R-HSA-8848584  
R-HSA-1793185  
R-HSA-5218859  
R-HSA-167044  
R-HSA-140837  
R-HSA-9694614  
R-HSA-9034015  
R-HSA-8876384  
R-HSA-4420097  
R-HSA-9670439  
R-HSA-166208  
R-HSA-879518  
R-HSA-9669938  
R-HSA-389357  
R-HSA-200425  
R-HSA-8936459  
R-HSA-448424  
R-HSA-9013106  
R-HSA-9027604  
R-HSA-444209  
R-HSA-5674400  
R-HSA-1500931  
R-HSA-5357956  
R-HSA-933542  
R-HSA-418592  
R-HSA-5669034  
R-HSA-6783589  
R-HSA-9658195  
R-HSA-1971475  
R-HSA-997272  
R-HSA-1296041  
R-HSA-1296059  
R-HSA-5601884  
R-HSA-9620244  
R-HSA-3000157  
R-HSA-5218921  
R-HSA-9025094  
R-HSA-5633008  
R-HSA-196807  
R-HSA-977606  
R-HSA-8874081  
R-HSA-8934593  
R-HSA-194138  
R-HSA-9664323

E7\_severemild\_down\_reactome

R-HSA-216083  
R-HSA-3928663  
R-HSA-83936  
R-HSA-9018679  
R-HSA-9006115  
R-HSA-202733  
R-HSA-69202  
R-HSA-8850843  
R-HSA-8940973  
R-HSA-5654732  
R-HSA-198933  
R-HSA-9663891  
R-HSA-5656169  
R-HSA-450282  
R-HSA-5654733  
R-HSA-418990  
R-HSA-9018683  
R-HSA-8878171  
R-HSA-69656  
R-HSA-8878166  
R-HSA-2424491  
R-HSA-456926  
R-HSA-114452  
R-HSA-186763  
R-HSA-195258  
R-HSA-9013407  
R-HSA-1296065  
R-HSA-1538133  
R-HSA-2022928  
R-HSA-5654726  
R-HSA-159418  
R-HSA-390471  
R-HSA-189483  
R-HSA-388841  
R-HSA-373080  
R-HSA-8982491  
R-HSA-5673000  
R-HSA-5654727  
R-HSA-392518  
R-HSA-187687  
R-HSA-9696273  
R-HSA-114604  
R-HSA-8941326  
R-HSA-201556  
R-HSA-140877  
R-HSA-8853659  
R-HSA-69205  
R-HSA-5668541  
R-HSA-6802948  
R-HSA-933541  
R-HSA-9013420  
R-HSA-2024096  
R-HSA-6805567

E7\_severemild\_down\_reactome

R-HSA-8875878  
R-HSA-74217  
R-HSA-8939236  
R-HSA-9759194  
R-HSA-1280218  
R-HSA-5357905  
R-HSA-168276  
R-HSA-5218920  
R-HSA-425397  
R-HSA-1251985  
R-HSA-451927  
R-HSA-110313  
R-HSA-71240  
R-HSA-453279  
R-HSA-9656223  
R-HSA-5674135  
R-HSA-3700989  
R-HSA-991365  
R-HSA-977444  
R-HSA-165159  
R-HSA-2173789  
R-HSA-1433557  
R-HSA-350562  
R-HSA-5654743  
R-HSA-3928662  
R-HSA-5654741  
R-HSA-9692914  
R-HSA-6802946  
R-HSA-9649948  
R-HSA-6802955  
R-HSA-6802949  
R-HSA-3928665  
R-HSA-3560782  
R-HSA-437239  
R-HSA-445989  
R-HSA-75893  
R-HSA-9634597  
R-HSA-8941858  
R-HSA-73893  
R-HSA-157858  
R-HSA-2871796  
R-HSA-2219528  
R-HSA-2162123  
R-HSA-9748787  
R-HSA-8939211  
R-HSA-9013409  
R-HSA-373752  
R-HSA-197264  
R-HSA-202433  
R-HSA-2029480  
R-HSA-9664433  
R-HSA-9662851  
R-HSA-162582

E7\_severemild\_down\_reactome

R-HSA-9692916  
R-HSA-2029485  
R-HSA-6811558  
R-HSA-3000171  
R-HSA-373760  
R-HSA-5654736  
R-HSA-9013406  
R-HSA-5578775  
R-HSA-193648  
R-HSA-109606  
R-HSA-199418  
R-HSA-4608870  
R-HSA-9772572  
R-HSA-2022090  
R-HSA-9716542  
R-HSA-977443  
R-HSA-421270  
R-HSA-3299685  
R-HSA-1227986  
R-HSA-9755511  
R-HSA-8956321  
R-HSA-186797  
R-HSA-375165  
R-HSA-983169  
R-HSA-5658442  
R-HSA-8848021  
R-HSA-9006927  
R-HSA-936837  
R-HSA-6802952  
R-HSA-5663220  
R-HSA-69017  
R-HSA-9013026  
R-HSA-69206  
R-HSA-1632852  
R-HSA-9006934  
R-HSA-189445  
R-HSA-1650814  
R-HSA-1834949  
R-HSA-8980692  
R-HSA-9018519  
R-HSA-5663202  
R-HSA-975634  
R-HSA-3000178  
R-HSA-69473  
R-HSA-1660661  
R-HSA-351202  
R-HSA-5625740  
R-HSA-4086398  
R-HSA-1445148  
R-HSA-204998  
R-HSA-5663084  
R-HSA-2029482  
R-HSA-112314

E7\_severemild\_down\_reactome

R-HSA-1236394  
R-HSA-1222556  
R-HSA-8852276  
R-HSA-5357801  
R-HSA-194315  
R-HSA-73887  
R-HSA-6796648  
R-HSA-416482  
R-HSA-425366  
R-HSA-9612973  
R-HSA-1638091  
R-HSA-6806834  
R-HSA-5654738  
R-HSA-6806667  
R-HSA-9018677  
R-HSA-1168372  
R-HSA-9013404  
R-HSA-1236974  
R-HSA-6802957  
R-HSA-1989781  
R-HSA-141444  
R-HSA-141424  
R-HSA-69052  
R-HSA-8876198  
R-HSA-109582  
R-HSA-446728  
R-HSA-400206  
R-HSA-2219530  
R-HSA-390466  
R-HSA-438064  
R-HSA-1474244  
R-HSA-69242  
R-HSA-1630316  
R-HSA-4086400  
R-HSA-9013423  
R-HSA-5619102  
R-HSA-2682334  
R-HSA-391251  
R-HSA-1474290  
R-HSA-9711123  
R-HSA-2730905  
R-HSA-1296071  
R-HSA-170834  
R-HSA-190236  
R-HSA-425407  
R-HSA-422356  
R-HSA-9678108  
R-HSA-8957275  
R-HSA-193704  
R-HSA-69618  
R-HSA-166786  
R-HSA-442755  
R-HSA-2559580

E7\_severemild\_down\_reactome

R-HSA-5617472  
R-HSA-5619507  
R-HSA-166663  
R-HSA-211000  
R-HSA-9648025  
R-HSA-1266738  
R-HSA-194068  
R-HSA-5628897  
R-HSA-381426  
R-HSA-2871809  
R-HSA-9012999  
R-HSA-9007101  
R-HSA-9006931  
R-HSA-69239  
R-HSA-9705671  
R-HSA-2500257  
R-HSA-9006936  
R-HSA-9675108  
R-HSA-9748784  
R-HSA-9705683  
R-HSA-2454202  
R-HSA-1257604  
R-HSA-8956319  
R-HSA-5576891  
R-HSA-202403  
R-HSA-163685  
R-HSA-1474228  
R-HSA-2262752  
R-HSA-2132295  
R-HSA-69481  
R-HSA-8953897  
R-HSA-9664422  
R-HSA-9664407  
R-HSA-9664417  
R-HSA-112315  
R-HSA-15869  
R-HSA-428157  
R-HSA-4839726  
R-HSA-3247509  
R-HSA-196849  
R-HSA-9013148  
R-HSA-9018678  
R-HSA-9694516  
R-HSA-3858494  
R-HSA-425393  
R-HSA-2142753  
R-HSA-9679191  
R-HSA-2187338  
R-HSA-69306  
R-HSA-9006925  
R-HSA-9610379  
R-HSA-2871837  
R-HSA-5619115

E7\_severemild\_down\_reactome

R-HSA-416476  
R-HSA-196854  
R-HSA-418555  
R-HSA-983705  
R-HSA-9013149  
R-HSA-109581  
R-HSA-2467813  
R-HSA-168255  
R-HSA-1640170  
R-HSA-3781865  
R-HSA-983168  
R-HSA-422475  
R-HSA-983712  
R-HSA-5617833  
R-HSA-68877  
R-HSA-69275  
R-HSA-5673001  
R-HSA-453274  
R-HSA-5684996  
R-HSA-397014  
R-HSA-376176  
R-HSA-71387  
R-HSA-9679506  
R-HSA-68882  
R-HSA-2555396  
R-HSA-71291  
R-HSA-5683057  
R-HSA-112316  
R-HSA-9609646  
R-HSA-69278  
R-HSA-5668914  
R-HSA-8978868  
R-HSA-8957322  
R-HSA-195721  
R-HSA-1852241  
R-HSA-212436  
R-HSA-5663205  
R-HSA-73894  
R-HSA-382551  
R-HSA-199991  
R-HSA-68886  
R-HSA-73857  
R-HSA-1643685  
R-HSA-74160  
R-HSA-5653656  
R-HSA-556833  
R-HSA-8953854  
R-HSA-597592  
R-HSA-392499  
R-HSA-9709957  
R-HSA-1430728

Pathway name  
Interleukin-10 signaling  
Immune System  
Cytokine Signaling in Immune system  
Interferon alpha/beta signaling  
Interferon Signaling  
Chemokine receptors bind chemokines  
Signaling by Interleukins  
Interleukin-4 and Interleukin-13 signaling  
Neutrophil degranulation  
Peptide ligand-binding receptors  
Class A/1 (Rhodopsin-like receptors)  
Innate Immune System  
Interferon gamma signaling  
GPCR ligand binding  
Transcriptional activation of cell cycle inhibitor p21  
Transcriptional activation of p53 responsive genes  
CLEC7A/inflammasome pathway  
G alpha (i) signalling events  
TP53 Regulates Transcription of Genes Involved in G1 Cell Cycle Arrest  
Signaling by GPCR  
Antiviral mechanism by IFN-stimulated genes  
OAS antiviral response  
NGF-stimulated transcription  
ATF4 activates genes in response to endoplasmic reticulum stress  
TFAP2 (AP-2) family regulates transcription of cell cycle factors  
TP53 Regulates Transcription of Cell Cycle Genes  
PERK regulates gene expression  
Hydroxycarboxylic acid-binding receptors  
RUNX3 regulates CDKN1A transcription  
FOXO-mediated transcription of cell cycle genes  
Nuclear Events (kinase and transcription factor activation)  
Interleukin-1 processing  
Senescence-Associated Secretory Phenotype (SASP)  
Interleukin-1 signaling  
Receptor Mediated Mitophagy  
Metal sequestration by antimicrobial proteins  
Signaling by NTRKs  
RHO GTPases Activate NADPH Oxidases  
GPCR downstream signalling  
p53-Dependent G1 DNA Damage Response  
p53-Dependent G1/S DNA damage checkpoint  
Defective SLCO1B1 causes hyperbilirubinemia, Rotor type (HBLRR)  
Defective binding of RB1 mutants to E2F1,(E2F2, E2F3)  
Aberrant regulation of mitotic G1/S transition in cancer due to RB1 defects  
G1/S DNA Damage Checkpoints  
Signaling by NTRK1 (TRKA)  
TP53 Regulates Transcription of Death Receptors and Ligands  
Signal regulatory protein family interactions  
Other semaphorin interactions  
Defective SERPING1 causes hereditary angioedema  
Defective SLC22A5 causes systemic primary carnitine deficiency (CDSP)  
STAT5 activation downstream of FLT3 ITD mutants

ISG15 antiviral mechanism  
Cellular Senescence  
C-type lectin receptors (CLRs)  
Antimicrobial peptides  
Cyclin D associated events in G1  
G1 Phase  
Toll Like Receptor 4 (TLR4) Cascade  
Purinergic signaling in leishmaniasis infection  
Cell recruitment (pro-inflammatory response)  
TGFB1 LBD Mutants in Cancer  
MyD88 deficiency (TLR2/4)  
MyD88:MAL(TIRAP) cascade initiated on plasma membrane  
Toll Like Receptor TLR6:TLR2 Cascade  
IRAK4 deficiency (TLR2/4)  
Nuclear events stimulated by ALK signaling in cancer  
Toll Like Receptor TLR1:TLR2 Cascade  
Toll Like Receptor 2 (TLR2) Cascade  
Estrogen-dependent nuclear events downstream of ESR-membrane signaling  
Interleukin-1 family signaling  
Signaling by FLT3 ITD and TKD mutants  
TNFR1-mediated ceramide production  
Phosphorylation of proteins involved in G1/S transition by active Cyclin E:Cdk2 complexes  
Regulation of gap junction activity  
Mitophagy  
Dectin-2 family  
DDX58/IFIH1-mediated induction of interferon-alpha/beta  
Urea cycle  
Signaling by FLT3 fusion proteins  
Triglyceride biosynthesis  
Loss of Function of TGFB1 in Cancer  
Fibronectin matrix formation  
DEX/H-box helicases activate type I IFN and inflammatory cytokines production  
Pyroptosis  
Transcriptional regulation of white adipocyte differentiation  
FOXO-mediated transcription  
DNA Damage/Telomere Stress Induced Senescence  
Transcriptional regulation of granulopoiesis  
Aberrant regulation of mitotic cell cycle due to RB1 defects  
Organic cation transport  
Regulation of TLR by endogenous ligand  
PTK6 Regulates Cell Cycle  
Formation of the Editosome  
Toll-like Receptor Cascades  
Negative regulators of DDX58/IFIH1 signaling  
Post-translational modification: synthesis of GPI-anchored proteins  
Toll Like Receptor 3 (TLR3) Cascade  
Diseases of mitotic cell cycle  
MyD88 dependent cascade initiated on endosome  
Toll Like Receptor 7/8 (TLR7/8) Cascade  
Integrin signaling  
EGR2 and SOX10-mediated initiation of Schwann cell myelination  
Proton/oligopeptide cotransporters  
Signaling by TGF-beta Receptor Complex in Cancer

CLEC7A (Dectin-1) signaling  
TRIF(TICAM1)-mediated TLR4 signaling  
MyD88-independent TLR4 cascade  
Toll Like Receptor 9 (TLR9) Cascade  
CD28 co-stimulation  
NPAS4 regulates expression of target genes  
Attachment of GPI anchor to uPAR  
Activated NTRK3 signals through PI3K  
mRNA Editing: C to U Conversion  
Netrin mediated repulsion signals  
Diseases associated with the TLR signaling cascade  
Diseases of Immune System  
FLT3 signaling in disease  
Myoclonic epilepsy of Lafora  
Highly calcium permeable nicotinic acetylcholine receptors  
Formyl peptide receptors bind formyl peptides and many other ligands  
Downregulation of ERBB4 signaling  
Activated NTRK2 signals through FYN  
Calcineurin activates NFAT  
Activation of the AP-1 family of transcription factors  
Ficolins bind to repetitive carbohydrate structures on the target cell surface  
GP1b-IX-V activation signalling  
mRNA Editing  
Regulation of commissural axon pathfinding by SLIT and ROBO  
Amyloid fiber formation  
Organic cation/anion/zwitterion transport  
Highly calcium permeable postsynaptic nicotinic acetylcholine receptors  
Cross-presentation of particulate exogenous antigens (phagosomes)  
Dermatan sulfate biosynthesis  
Formation of the cornified envelope  
TICAM1-dependent activation of IRF3/IRF7  
InIA-mediated entry of *Listeria monocytogenes* into host cells  
RHOBTB3 ATPase cycle  
TNFR1-induced proapoptotic signaling  
Dissolution of Fibrin Clot  
Regulation of localization of FOXO transcription factors  
PECAM1 interactions  
PKMTs methylate histone lysines  
Platelet degranulation  
Transcriptional regulation by the AP-2 (TFAP2) family of transcription factors  
Presynaptic nicotinic acetylcholine receptors  
Lectin pathway of complement activation  
Chk1/Chk2(Cds1) mediated inactivation of Cyclin B:Cdk1 complex  
DAP12 interactions  
Platelet Aggregation (Plug Formation)  
Cross-presentation of soluble exogenous antigens (endosomes)  
Platelet activation, signaling and aggregation  
Antigen processing-Cross presentation  
Defective EXT2 causes exostoses 2  
Defective EXT1 causes exostoses 1, TRPS2 and CHDS  
Platelet Adhesion to exposed collagen  
Advanced glycosylation endproduct receptor signaling  
Wax biosynthesis

AKT phosphorylates targets in the cytosol  
Response to elevated platelet cytosolic Ca<sup>2+</sup>  
TRAF6 mediated IRF7 activation in TLR7/8 or 9 signaling  
Acetylcholine binding and downstream events  
Postsynaptic nicotinic acetylcholine receptors  
Formation of Senescence-Associated Heterochromatin Foci (SAHF)  
Reversible hydration of carbon dioxide  
TNF receptor superfamily (TNFSF) members mediating non-canonical NF- $\kappa$ B pathway  
IL-6-type cytokine receptor ligand interactions  
FCGR activation  
MAP3K8 (TPL2)-dependent MAPK1/3 activation  
Regulation of KIT signaling  
P2Y receptors  
Unfolded Protein Response (UPR)  
Transcriptional Regulation by NPAS4  
Complement cascade  
Signaling by EGFR  
DCC mediated attractive signaling  
p38MAPK events  
Activation of BAD and translocation to mitochondria  
TGF-beta receptor signaling in EMT (epithelial to mesenchymal transition)  
SARS-CoV-2 targets host intracellular signalling and regulatory pathways  
SARS-CoV-1 targets host intracellular signalling and regulatory pathways  
Protein repair  
Spry regulation of FGF signaling  
MyD88 cascade initiated on plasma membrane  
Toll Like Receptor 10 (TLR10) Cascade  
Toll Like Receptor 5 (TLR5) Cascade  
SCF(Skp2)-mediated degradation of p27/p21  
GRB2:SOS provides linkage to MAPK signaling for Integrins  
Activation of IRF3/IRF7 mediated by TBK1/IKK epsilon  
TRAF3-dependent IRF activation pathway  
Acetylcholine regulates insulin secretion  
Atorvastatin ADME  
Extra-nuclear estrogen signaling  
Defective B4GALT7 causes EDS, progeroid type  
Defective B3GALT6 causes EDSP2 and SEMDJL1  
TP53 Regulates Transcription of Genes Involved in G2 Cell Cycle Arrest  
Diseases of hemostasis  
Defects of contact activation system (CAS) and kallikrein/kinin system (KKS)  
Triglyceride metabolism  
Signaling by ALK fusions and activated point mutants  
Signaling by ALK in cancer  
p130Cas linkage to MAPK signaling for integrins  
Defective B3GAT3 causes JDSSDHD  
PINK1-PRKN Mediated Mitophagy  
Synthesis of 15-eicosatetraenoic acid derivatives  
Glycogen storage diseases  
TRAF6 mediated induction of NF $\kappa$ B and MAP kinases upon TLR7/8 or 9 activation  
RAB geranylgeranylation  
Transcriptional regulation by RUNX3  
Ephrin signaling  
GAB1 signalosome

Nucleotide-like (purinergic) receptors  
MAP kinase activation  
Cell Cycle Checkpoints  
Glycogen synthesis  
Crosslinking of collagen fibrils  
Other interleukin signaling  
Semaphorin interactions  
CTLA4 inhibitory signaling  
Serine biosynthesis  
Wax and plasmalogen biosynthesis  
Chondroitin sulfate/dermatan sulfate metabolism  
Regulated Necrosis  
Signalling to RAS  
Intrinsic Pathway of Fibrin Clot Formation  
Attachment and Entry  
Signaling by NTRK3 (TRKC)  
Listeria monocytogenes entry into host cells  
VEGFA-VEGFR2 Pathway  
Signaling by phosphorylated juxtamembrane, extracellular and kinase domain KIT mutants  
mTORC1-mediated signalling  
Transport of organic anions  
Signaling by KIT in disease  
CD28 dependent PI3K/Akt signaling  
Carnitine metabolism  
RUNX1 regulates genes involved in megakaryocyte differentiation and platelet function  
Interleukin-17 signaling  
RHOC GTPase cycle  
Biosynthesis of electrophilic Å“Å“t-3 PUFA oxo-derivatives  
Free fatty acid receptors  
Constitutive Signaling by AKT1 E17K in Cancer  
Cell-Cell communication  
TNFR1-induced NFkappaB signaling pathway  
TRAF6 mediated NF-kB activation  
ADP signalling through P2Y purinoceptor 1  
TNFs bind their physiological receptors  
Interleukin-6 family signaling  
Leishmania infection  
A tetrasaccharide linker sequence is required for GAG synthesis  
Inhibition of voltage gated Ca<sup>2+</sup> channels via Gbeta/gamma subunits  
Activation of G protein gated Potassium channels  
G protein gated Potassium channels  
PIWI-interacting RNA (piRNA) biogenesis  
Long-term potentiation  
Laminin interactions  
VEGFR2 mediated cell proliferation  
Biosynthesis of DPAn-3 SPMs  
TP53 Regulates Transcription of Cell Death Genes  
Nicotinate metabolism  
Regulation of Complement cascade  
MET activates PTK2 signaling  
Regulation of RUNX1 Expression and Activity  
Signaling by VEGF  
FCGR3A-mediated IL10 synthesis

Integrin cell surface interactions  
EPHA-mediated growth cone collapse  
Transport of nucleosides and free purine and pyrimidine bases across the plasma membrane  
Biosynthesis of EPA-derived SPMs  
Signaling by NTRK2 (TRKB)  
Cell surface interactions at the vascular wall  
Cyclin E associated events during G1/S transition  
Phosphate bond hydrolysis by NTPDase proteins  
RUNX2 regulates osteoblast differentiation  
Negative regulation of FGFR3 signaling  
Immunoregulatory interactions between a Lymphoid and a non-Lymphoid cell  
Selective autophagy  
Termination of translesion DNA synthesis  
MAPK targets/ Nuclear events mediated by MAP kinases  
Negative regulation of FGFR4 signaling  
Adherens junctions interactions  
Biosynthesis of DPA-derived SPMs  
Transcriptional regulation by RUNX1  
Cyclin A:Cdk2-associated events at S phase entry  
Transcriptional regulation by RUNX2  
DAP12 signaling  
Thrombin signalling through proteinase activated receptors (PARs)  
Activation of BH3-only proteins  
Downstream signal transduction  
RHO GTPase Effectors  
RHOH GTPase cycle  
Inwardly rectifying K<sup>+</sup> channels  
G0 and Early G1  
HS-GAG biosynthesis  
Negative regulation of FGFR1 signaling  
Recycling of bile acids and salts  
Association of TriC/CCT with target proteins during biosynthesis  
Heme degradation  
Costimulation by the CD28 family  
Class B/2 (Secretin family receptors)  
Glycogen metabolism  
RAF activation  
Negative regulation of FGFR2 signaling  
Signal amplification  
Signalling to ERKs  
RND1 GTPase cycle  
GPVI-mediated activation cascade  
RUNX2 regulates bone development  
Signaling by ALK  
Formation of Fibrin Clot (Clotting Cascade)  
RET signaling  
G1/S-Specific Transcription  
TNFR2 non-canonical NF- $\kappa$ B pathway  
Signaling by high-kinase activity BRAF mutants  
TRAF6 mediated IRF7 activation  
RHOH GTPase cycle  
HS-GAG degradation  
Keratinization

MET promotes cell motility  
Purine salvage  
RUNX1 regulates transcription of genes involved in differentiation of HSCs  
Nuclear events mediated by NFE2L2  
Adaptive Immune System  
Regulation of TNFR1 signaling  
NS1 Mediated Effects on Host Pathways  
VEGFR2 mediated vascular permeability  
Transport of vitamins, nucleosides, and related molecules  
Nuclear signaling by ERBB4  
Interleukin-2 family signaling  
Translesion synthesis by Y family DNA polymerases bypasses lesions on DNA template  
Tryptophan catabolism  
Mitotic G1 phase and G1/S transition  
Signaling by RAF1 mutants  
MAP2K and MAPK activation  
Transcriptional Regulation by TP53  
Activation of GABAB receptors  
GABA B receptor activation  
MTOR signalling  
TGF-beta receptor signaling activates SMADs  
Signaling by SCF-KIT  
Regulation of ornithine decarboxylase (ODC)  
Signaling by FGFR4  
EPHB-mediated forward signaling  
Signaling by FGFR3  
SARS-CoV-1-host interactions  
Signaling by moderate kinase activity BRAF mutants  
Signaling downstream of RAS mutants  
Paradoxical activation of RAF signaling by kinase inactive BRAF  
Signaling by RAS mutants  
EPH-ephrin mediated repulsion of cells  
Diseases associated with glycosaminoglycan metabolism  
Recycling pathway of L1  
TAK1-dependent IKK and NF-kappa-B activation  
TNF signaling  
GPER1 signaling  
Regulation of RUNX3 expression and activity  
DNA Damage Bypass  
Gap junction trafficking and regulation  
FCERI mediated MAPK activation  
PI3K/AKT Signaling in Cancer  
Synthesis of Prostaglandins (PG) and Thromboxanes (TX)  
Azathioprine ADME  
ESR-mediated signaling  
RHOJ GTPase cycle  
Netrin-1 signaling  
Nicotinamide salvaging  
Generation of second messenger molecules  
Fcgamma receptor (FCGR) dependent phagocytosis  
Leishmania parasite growth and survival  
Anti-inflammatory response favouring Leishmania parasite infection  
Signal Transduction

SARS-CoV-1 activates/modulates innate immune responses  
Role of phospholipids in phagocytosis  
PI5P, PP2A and IER3 Regulate PI3K/AKT Signaling  
Non-integrin membrane-ECM interactions  
L1CAM interactions  
Signaling by FGFR1  
RHOQ GTPase cycle  
Ion homeostasis  
NRAGE signals death through JNK  
Intrinsic Pathway for Apoptosis  
Negative regulation of the PI3K/AKT network  
Asymmetric localization of PCP proteins  
Early SARS-CoV-2 Infection Events  
Assembly of collagen fibrils and other multimeric structures  
Signaling by Rho GTPases, Miro GTPases and RHOBTB3  
GABA receptor activation  
Cell-cell junction organization  
Detoxification of Reactive Oxygen Species  
Signaling by ERBB2  
KEAP1-NFE2L2 pathway  
Nucleotide salvage  
Signaling by PDGF  
NCAM signaling for neurite out-growth  
Class I MHC mediated antigen processing & presentation  
Regulation of RAS by GAPs  
Signaling by PTK6  
Signaling by Non-Receptor Tyrosine Kinases  
Ion transport by P-type ATPases  
Signaling by BRAF and RAF1 fusions  
RHO GTPases Activate Formins  
CDK-mediated phosphorylation and removal of Cdc6  
RHOB GTPase cycle  
G1/S Transition  
Macroautophagy  
Signaling by Receptor Tyrosine Kinases  
Metabolism of porphyrins  
Collagen biosynthesis and modifying enzymes  
Cytosolic sensors of pathogen-associated DNA  
RHOA GTPase cycle  
Estrogen-dependent gene expression  
Diseases of signal transduction by growth factor receptors and second messengers  
Retinoid metabolism and transport  
ECM proteoglycans  
G2/M DNA damage checkpoint  
Sphingolipid de novo biosynthesis  
Metabolism of polyamines  
RHO GTPases activate PKNs  
Ca<sup>2+</sup> pathway  
Translocation of SLC2A4 (GLUT4) to the plasma membrane  
Cell death signalling via NRAGE, NRIF and NADE  
Diseases of carbohydrate metabolism  
Regulation of actin dynamics for phagocytic cup formation  
Neurotransmitter receptors and postsynaptic signal transmission

Signaling by ERBB4  
ROS and RNS production in phagocytes  
The role of GTSE1 in G2/M progression after G2 checkpoint  
Programmed Cell Death  
Signaling by Rho GTPases  
Death Receptor Signalling  
TP53 Regulates Transcription of DNA Repair Genes  
G alpha (12/13) signalling events  
Transport of bile salts and organic acids, metal ions and amine compounds  
Autophagy  
Heparan sulfate/heparin (HS-GAG) metabolism  
Signaling by MET  
Signaling by FGFR2  
Metabolism of fat-soluble vitamins  
Biosynthesis of DHA-derived SPMs  
Downstream signaling events of B Cell Receptor (BCR)  
RAC2 GTPase cycle  
ER-Phagosome pathway  
Oncogenic MAPK signaling  
PPARA activates gene expression  
Amplification of signal from unattached kinetochores via a MAD2 inhibitory signal  
Amplification of signal from the kinetochores  
Switching of origins to a post-replicative state  
RAB GEFs exchange GTP for GDP on RABs  
Hemostasis  
Cell junction organization  
Regulation of lipid metabolism by PPARalpha  
Constitutive Signaling by Aberrant PI3K in Cancer  
Chaperonin-mediated protein folding  
Post NMDA receptor activation events  
Extracellular matrix organization  
S Phase  
Glycosaminoglycan metabolism  
PCP/CE pathway  
RAC3 GTPase cycle  
SLC transporter disorders  
EPH-Ephrin signaling  
Protein folding  
Collagen formation  
Cellular response to chemical stress  
Role of LAT2/NTAL/LAB on calcium mobilization  
Potassium Channels  
Signaling by TGF-beta Receptor Complex  
Signaling by FGFR  
SLC-mediated transmembrane transport  
Regulation of insulin secretion  
SARS-CoV-1 Infection  
Post-translational protein phosphorylation  
p75 NTR receptor-mediated signalling  
Mitotic Spindle Checkpoint  
Creation of C4 and C2 activators  
Activation of NMDA receptors and postsynaptic events  
Oxidative Stress Induced Senescence

## E7\_severemild\_down\_reactome

Activation of anterior HOX genes in hindbrain development during early embryogenesis  
Activation of HOX genes during differentiation  
Initial triggering of complement  
Gene Silencing by RNA  
EML4 and NUDC in mitotic spindle formation  
Developmental Biology  
Bile acid and bile salt metabolism  
TP53 Regulates Metabolic Genes  
Regulation of Insulin-like Growth Factor (IGF) transport and uptake by Insulin-like Growth Factor Binding Proteins (IGFBP)  
FCERI mediated Ca<sup>2+</sup> mobilization  
RHO GTPase cycle  
Rab regulation of trafficking  
Signaling by Nuclear Receptors  
Synthesis of DNA  
SARS-CoV-2 activates/modulates innate and adaptive immune responses  
Resolution of Sister Chromatid Cohesion  
Signaling by TGF $\beta$  family members  
Nervous system development  
Drug ADME  
SARS-CoV-2-host interactions  
Fc epsilon receptor (FCERI) signaling  
PIP3 activates AKT signaling  
Nucleotide catabolism  
Cardiac conduction  
TCR signaling  
Integration of energy metabolism  
Degradation of the extracellular matrix  
Cellular responses to stress  
MHC class II antigen presentation  
G2/M Checkpoints  
Cellular responses to stimuli  
FCGR3A-mediated phagocytosis  
Parasite infection  
Leishmania phagocytosis  
Transmission across Chemical Synapses  
Metabolism of nucleotides  
Sphingolipid metabolism  
Chromatin organization  
Chromatin modifying enzymes  
Metabolism of water-soluble vitamins and cofactors  
CDC42 GTPase cycle  
Biosynthesis of specialized proresolving mediators (SPMs)  
SARS-CoV-2 Infection  
Beta-catenin independent WNT signaling  
Transport of inorganic cations/anions and amino acids/oligopeptides  
Arachidonic acid metabolism  
Potential therapeutics for SARS  
Visual phototransduction  
DNA Replication  
Intracellular signaling by second messengers  
HCMV Late Events  
FCERI mediated NF- $\kappa$ B activation  
Disorders of transmembrane transporters

G alpha (q) signalling events  
Metabolism of vitamins and cofactors  
G alpha (s) signalling events  
Signaling by the B Cell Receptor (BCR)  
RAC1 GTPase cycle  
Apoptosis  
Separation of Sister Chromatids  
Influenza Infection  
Cell Cycle  
Diseases of glycosylation  
Antigen processing: Ubiquitination & Proteasome degradation  
Axon guidance  
Ion channel transport  
Cilium Assembly  
Mitotic Prometaphase  
G2/M Transition  
RAF/MAP kinase cascade  
Mitotic G2-G2/M phases  
MAPK1/MAPK3 signaling  
Muscle contraction  
Signaling by ROBO receptors  
Metabolism of carbohydrates  
SARS-CoV Infections  
Mitotic Anaphase  
Mitotic Metaphase and Anaphase  
Metabolism of amino acids and derivatives  
MAPK family signaling cascades  
Neuronal System  
HCMV Infection  
Cell Cycle, Mitotic  
Diseases of metabolism  
Fatty acid metabolism  
Metabolism of steroids  
Signaling by WNT  
Organelle biogenesis and maintenance  
Generic Transcription Pathway  
Infectious disease  
DNA Repair  
Transport of small molecules  
Membrane Trafficking  
M Phase  
RNA Polymerase II Transcription  
Disease  
Gene expression (Transcription)  
Vesicle-mediated transport  
Metabolism of lipids  
Metabolism of RNA  
Post-translational protein modification  
Metabolism of proteins  
Sensory Perception  
Metabolism

## E7\_severemild\_down\_reactome

| Entities found | Entities total | Entities ratio | Entities pValue | Entities FDR  | Reactions found |
|----------------|----------------|----------------|-----------------|---------------|-----------------|
| 30             | 86             | 0.00566423     | 1.11E-16        | 1.79E-14      | 4               |
| 119            | 2698           | 0.177698742    | 1.11E-16        | 1.79E-14      | 246             |
| 77             | 1107           | 0.072910492    | 1.11E-16        | 1.79E-14      | 80              |
| 29             | 190            | 0.012513996    | 1.11E-16        | 1.79E-14      | 2               |
| 36             | 397            | 0.026147665    | 3.33E-16        | 4.26E-14      | 26              |
| 16             | 57             | 0.003754199    | 6.33E-15        | 6.77E-13      | 7               |
| 42             | 658            | 0.043337944    | 1.36E-13        | 1.25E-11      | 43              |
| 22             | 211            | 0.013897122    | 1.92E-11        | 0.00000000153 | 8               |
| 32             | 480            | 0.031614305    | 5.01E-11        | 0.00000000355 | 10              |
| 20             | 203            | 0.013370217    | 4.29E-10        | 0.0000000274  | 12              |
| 24             | 414            | 0.027267338    | 0.000000195     | 0.0000113     | 16              |
| 47             | 1345           | 0.088585918    | 0.00000129      | 0.0000682     | 150             |
| 16             | 252            | 0.01659751     | 0.00000748      | 0.000367      | 2               |
| 26             | 608            | 0.040044787    | 0.0000151       | 0.000693      | 17              |
| 3              | 6              | 0.000395       | 0.000156        | 0.006257824   | 4               |
| 3              | 6              | 0.000395       | 0.000156        | 0.006257824   | 4               |
| 3              | 8              | 0.000527       | 0.000362        | 0.012935808   | 2               |
| 18             | 426            | 0.028057696    | 0.00037         | 0.012935808   | 6               |
| 4              | 20             | 0.001317263    | 0.000398        | 0.013140044   | 6               |
| 29             | 875            | 0.057630244    | 0.000413        | 0.013200483   | 31              |
| 7              | 94             | 0.006191135    | 0.001178668     | 0.035360037   | 22              |
| 3              | 15             | 0.000988       | 0.00218742      | 0.063435178   | 6               |
| 5              | 56             | 0.003688336    | 0.002755347     | 0.07203936    | 14              |
| 4              | 34             | 0.002239347    | 0.002770745     | 0.07203936    | 2               |
| 2              | 6              | 0.000395       | 0.004732612     | 0.11831529    | 3               |
| 5              | 65             | 0.004281104    | 0.005144961     | 0.123479075   | 10              |
| 4              | 42             | 0.002766252    | 0.005816387     | 0.1337769     | 2               |
| 2              | 7              | 0.000461       | 0.006371068     | 0.146534565   | 2               |
| 2              | 8              | 0.000527       | 0.008230392     | 0.181068621   | 3               |
| 3              | 27             | 0.001778305    | 0.011014673     | 0.231308141   | 5               |
| 5              | 80             | 0.005269051    | 0.011894595     | 0.237891898   | 14              |
| 2              | 12             | 0.00079        | 0.017724199     | 0.349781816   | 2               |
| 5              | 91             | 0.005993545    | 0.019576813     | 0.349781816   | 9               |
| 6              | 125            | 0.008232892    | 0.01992637      | 0.349781816   | 24              |
| 2              | 13             | 0.000856       | 0.020575401     | 0.349781816   | 3               |
| 2              | 13             | 0.000856       | 0.020575401     | 0.349781816   | 2               |
| 7              | 166            | 0.010933281    | 0.023219958     | 0.394739289   | 21              |
| 3              | 38             | 0.002502799    | 0.026874812     | 0.429996987   | 9               |
| 21             | 794            | 0.05229533     | 0.027828348     | 0.444844525   | 14              |
| 4              | 70             | 0.00461042     | 0.031343718     | 0.444844525   | 6               |
| 4              | 70             | 0.00461042     | 0.031343718     | 0.444844525   | 6               |
| 1              | 2              | 0.000132       | 0.033034452     | 0.444844525   | 1               |
| 2              | 17             | 0.001119673    | 0.033686528     | 0.444844525   | 1               |
| 2              | 17             | 0.001119673    | 0.033686528     | 0.444844525   | 1               |
| 4              | 72             | 0.004742146    | 0.034202463     | 0.444844525   | 6               |
| 6              | 143            | 0.009418429    | 0.035035114     | 0.444844525   | 16              |
| 2              | 18             | 0.001185536    | 0.037358929     | 0.444844525   | 2               |
| 2              | 18             | 0.001185536    | 0.037358929     | 0.444844525   | 2               |
| 2              | 19             | 0.0012514      | 0.041176966     | 0.444844525   | 2               |
| 1              | 3              | 0.000198       | 0.049141747     | 0.444844525   | 3               |
| 1              | 3              | 0.000198       | 0.049141747     | 0.444844525   | 1               |
| 2              | 21             | 0.001383126    | 0.04922679      | 0.444844525   | 2               |

## E7\_severemild\_down\_reactome

|   |     |             |             |             |    |
|---|-----|-------------|-------------|-------------|----|
| 4 | 83  | 0.00546664  | 0.052556863 | 0.444844525 | 16 |
| 7 | 200 | 0.013172627 | 0.053751733 | 0.444844525 | 19 |
| 7 | 203 | 0.013370217 | 0.057272842 | 0.444844525 | 13 |
| 5 | 123 | 0.008101166 | 0.058028048 | 0.444844525 | 7  |
| 3 | 52  | 0.003424883 | 0.058231822 | 0.444844525 | 8  |
| 3 | 52  | 0.003424883 | 0.058231822 | 0.444844525 | 8  |
| 6 | 165 | 0.010867418 | 0.061588288 | 0.444844525 | 31 |
| 3 | 54  | 0.003556609 | 0.063679991 | 0.444844525 | 3  |
| 3 | 54  | 0.003556609 | 0.063679991 | 0.444844525 | 3  |
| 1 | 4   | 0.000263    | 0.064981768 | 0.444844525 | 1  |
| 2 | 26  | 0.001712442 | 0.071510233 | 0.444844525 | 2  |
| 5 | 133 | 0.008759797 | 0.075332016 | 0.444844525 | 27 |
| 5 | 133 | 0.008759797 | 0.075332016 | 0.444844525 | 27 |
| 2 | 27  | 0.001778305 | 0.076295915 | 0.444844525 | 2  |
| 2 | 27  | 0.001778305 | 0.076295915 | 0.444844525 | 1  |
| 5 | 136 | 0.008957387 | 0.081013697 | 0.444844525 | 27 |
| 5 | 136 | 0.008957387 | 0.081013697 | 0.444844525 | 27 |
| 2 | 29  | 0.001910031 | 0.086157863 | 0.444844525 | 2  |
| 6 | 183 | 0.012052954 | 0.090272201 | 0.444844525 | 26 |
| 2 | 30  | 0.001975894 | 0.091225105 | 0.444844525 | 2  |
| 1 | 6   | 0.000395    | 0.095877587 | 0.444844525 | 3  |
| 1 | 6   | 0.000395    | 0.095877587 | 0.444844525 | 1  |
| 1 | 6   | 0.000395    | 0.095877587 | 0.444844525 | 3  |
| 2 | 31  | 0.002041757 | 0.09637738  | 0.444844525 | 5  |
| 3 | 65  | 0.004281104 | 0.097523704 | 0.444844525 | 10 |
| 4 | 104 | 0.006849766 | 0.099628821 | 0.444844525 | 16 |
| 2 | 32  | 0.00210762  | 0.101610477 | 0.444844525 | 2  |
| 2 | 32  | 0.00210762  | 0.101610477 | 0.444844525 | 2  |
| 2 | 33  | 0.002173484 | 0.1069203   | 0.444844525 | 1  |
| 1 | 7   | 0.000461    | 0.110942004 | 0.444844525 | 1  |
| 1 | 7   | 0.000461    | 0.110942004 | 0.444844525 | 1  |
| 1 | 7   | 0.000461    | 0.110942004 | 0.444844525 | 1  |
| 2 | 34  | 0.002239347 | 0.112302868 | 0.444844525 | 1  |
| 4 | 109 | 0.007179082 | 0.112993238 | 0.444844525 | 6  |
| 4 | 110 | 0.007244945 | 0.115757238 | 0.444844525 | 6  |
| 3 | 71  | 0.004676283 | 0.118470856 | 0.444844525 | 6  |
| 3 | 71  | 0.004676283 | 0.118470856 | 0.444844525 | 8  |
| 2 | 36  | 0.002371073 | 0.123270856 | 0.444844525 | 1  |
| 2 | 36  | 0.002371073 | 0.123270856 | 0.444844525 | 2  |
| 2 | 36  | 0.002371073 | 0.123270856 | 0.444844525 | 1  |
| 1 | 8   | 0.000527    | 0.125756387 | 0.444844525 | 2  |
| 1 | 8   | 0.000527    | 0.125756387 | 0.444844525 | 1  |
| 6 | 202 | 0.013304354 | 0.127165452 | 0.444844525 | 39 |
| 2 | 37  | 0.002436936 | 0.128848855 | 0.444844525 | 2  |
| 4 | 115 | 0.007574261 | 0.130012196 | 0.444844525 | 3  |
| 4 | 116 | 0.007640124 | 0.132947427 | 0.444844525 | 15 |
| 2 | 38  | 0.002502799 | 0.134484749 | 0.444844525 | 1  |
| 4 | 117 | 0.007705987 | 0.135909798 | 0.444844525 | 16 |
| 4 | 118 | 0.00777185  | 0.138898893 | 0.444844525 | 16 |
| 2 | 39  | 0.002568662 | 0.140175082 | 0.444844525 | 19 |
| 2 | 39  | 0.002568662 | 0.140175082 | 0.444844525 | 19 |
| 1 | 9   | 0.000593    | 0.140324869 | 0.444844525 | 1  |
| 1 | 9   | 0.000593    | 0.140324869 | 0.444844525 | 1  |

## E7\_severemild\_down\_reactome

|   |     |             |             |             |    |
|---|-----|-------------|-------------|-------------|----|
| 4 | 120 | 0.007903576 | 0.144955586 | 0.444844525 | 3  |
| 4 | 121 | 0.00796944  | 0.148022336 | 0.444844525 | 15 |
| 4 | 121 | 0.00796944  | 0.148022336 | 0.444844525 | 15 |
| 4 | 121 | 0.00796944  | 0.148022336 | 0.444844525 | 16 |
| 2 | 41  | 0.002700389 | 0.151705736 | 0.444844525 | 3  |
| 2 | 41  | 0.002700389 | 0.151705736 | 0.444844525 | 2  |
| 1 | 10  | 0.000659    | 0.154651517 | 0.444844525 | 2  |
| 1 | 10  | 0.000659    | 0.154651517 | 0.444844525 | 4  |
| 1 | 10  | 0.000659    | 0.154651517 | 0.444844525 | 2  |
| 1 | 10  | 0.000659    | 0.154651517 | 0.444844525 | 1  |
| 2 | 42  | 0.002766252 | 0.157539628 | 0.444844525 | 4  |
| 2 | 42  | 0.002766252 | 0.157539628 | 0.444844525 | 4  |
| 2 | 43  | 0.002832115 | 0.163415099 | 0.444844525 | 2  |
| 1 | 11  | 0.000724    | 0.16874033  | 0.444844525 | 2  |
| 1 | 11  | 0.000724    | 0.16874033  | 0.444844525 | 2  |
| 1 | 11  | 0.000724    | 0.16874033  | 0.444844525 | 1  |
| 1 | 11  | 0.000724    | 0.16874033  | 0.444844525 | 1  |
| 1 | 11  | 0.000724    | 0.16874033  | 0.444844525 | 1  |
| 1 | 12  | 0.00079     | 0.18259524  | 0.444844525 | 2  |
| 1 | 12  | 0.00079     | 0.18259524  | 0.444844525 | 2  |
| 1 | 12  | 0.00079     | 0.18259524  | 0.444844525 | 1  |
| 1 | 12  | 0.00079     | 0.18259524  | 0.444844525 | 2  |
| 1 | 12  | 0.00079     | 0.18259524  | 0.444844525 | 2  |
| 1 | 12  | 0.00079     | 0.18259524  | 0.444844525 | 1  |
| 3 | 89  | 0.005861819 | 0.189466309 | 0.444844525 | 2  |
| 2 | 48  | 0.003161431 | 0.193314622 | 0.444844525 | 2  |
| 1 | 13  | 0.000856    | 0.196220115 | 0.444844525 | 2  |
| 1 | 13  | 0.000856    | 0.196220115 | 0.444844525 | 1  |
| 1 | 13  | 0.000856    | 0.196220115 | 0.444844525 | 1  |
| 4 | 138 | 0.009089113 | 0.203626184 | 0.444844525 | 9  |
| 1 | 14  | 0.000922    | 0.209618761 | 0.444844525 | 4  |
| 1 | 14  | 0.000922    | 0.209618761 | 0.444844525 | 2  |
| 1 | 14  | 0.000922    | 0.209618761 | 0.444844525 | 1  |
| 1 | 14  | 0.000922    | 0.209618761 | 0.444844525 | 1  |
| 1 | 14  | 0.000922    | 0.209618761 | 0.444844525 | 6  |
| 1 | 14  | 0.000922    | 0.209618761 | 0.444844525 | 1  |
| 1 | 14  | 0.000922    | 0.209618761 | 0.444844525 | 1  |
| 2 | 51  | 0.00335902  | 0.211575141 | 0.444844525 | 4  |
| 4 | 141 | 0.009286702 | 0.214024227 | 0.444844525 | 2  |
| 2 | 52  | 0.003424883 | 0.217700478 | 0.444844525 | 3  |
| 1 | 15  | 0.000988    | 0.222794919 | 0.444844525 | 2  |
| 1 | 15  | 0.000988    | 0.222794919 | 0.444844525 | 2  |
| 1 | 15  | 0.000988    | 0.222794919 | 0.444844525 | 1  |
| 2 | 53  | 0.003490746 | 0.223841215 | 0.444844525 | 26 |
| 2 | 53  | 0.003490746 | 0.223841215 | 0.444844525 | 19 |
| 2 | 53  | 0.003490746 | 0.223841215 | 0.444844525 | 4  |
| 7 | 293 | 0.019297899 | 0.224829687 | 0.444844525 | 34 |
| 5 | 195 | 0.012843312 | 0.232018668 | 0.444844525 | 6  |
| 1 | 16  | 0.00105381  | 0.235752269 | 0.444844525 | 4  |
| 1 | 16  | 0.00105381  | 0.235752269 | 0.444844525 | 4  |
| 1 | 16  | 0.00105381  | 0.235752269 | 0.444844525 | 3  |
| 1 | 16  | 0.00105381  | 0.235752269 | 0.444844525 | 2  |
| 1 | 16  | 0.00105381  | 0.235752269 | 0.444844525 | 1  |

## E7\_severemild\_down\_reactome

|   |     |             |             |             |    |
|---|-----|-------------|-------------|-------------|----|
| 1 | 16  | 0.00105381  | 0.235752269 | 0.444844525 | 1  |
| 4 | 148 | 0.009747744 | 0.238825856 | 0.444844525 | 2  |
| 1 | 17  | 0.001119673 | 0.24849443  | 0.444844525 | 5  |
| 1 | 17  | 0.001119673 | 0.24849443  | 0.444844525 | 4  |
| 1 | 17  | 0.001119673 | 0.24849443  | 0.444844525 | 2  |
| 1 | 17  | 0.001119673 | 0.24849443  | 0.444844525 | 1  |
| 1 | 17  | 0.001119673 | 0.24849443  | 0.444844525 | 2  |
| 1 | 17  | 0.001119673 | 0.24849443  | 0.444844525 | 2  |
| 1 | 17  | 0.001119673 | 0.24849443  | 0.444844525 | 2  |
| 3 | 103 | 0.006783903 | 0.250443034 | 0.444844525 | 5  |
| 1 | 18  | 0.001185536 | 0.261024963 | 0.444844525 | 8  |
| 1 | 18  | 0.001185536 | 0.261024963 | 0.444844525 | 3  |
| 1 | 18  | 0.001185536 | 0.261024963 | 0.444844525 | 1  |
| 4 | 155 | 0.010208786 | 0.264257121 | 0.444844525 | 2  |
| 2 | 60  | 0.003951788 | 0.267081105 | 0.444844525 | 2  |
| 4 | 156 | 0.010274649 | 0.267932631 | 0.444844525 | 9  |
| 2 | 61  | 0.004017651 | 0.273271344 | 0.444844525 | 2  |
| 1 | 19  | 0.0012514   | 0.273347369 | 0.444844525 | 8  |
| 1 | 19  | 0.0012514   | 0.273347369 | 0.444844525 | 2  |
| 1 | 19  | 0.0012514   | 0.273347369 | 0.444844525 | 2  |
| 1 | 19  | 0.0012514   | 0.273347369 | 0.444844525 | 2  |
| 1 | 19  | 0.0012514   | 0.273347369 | 0.444844525 | 1  |
| 1 | 19  | 0.0012514   | 0.273347369 | 0.444844525 | 1  |
| 1 | 19  | 0.0012514   | 0.273347369 | 0.444844525 | 1  |
| 1 | 19  | 0.0012514   | 0.273347369 | 0.444844525 | 1  |
| 3 | 109 | 0.007179082 | 0.277438532 | 0.444844525 | 11 |
| 3 | 109 | 0.007179082 | 0.277438532 | 0.444844525 | 11 |
| 3 | 109 | 0.007179082 | 0.277438532 | 0.444844525 | 11 |
| 2 | 62  | 0.004083514 | 0.279459501 | 0.444844525 | 6  |
| 1 | 20  | 0.001317263 | 0.285465092 | 0.444844525 | 2  |
| 1 | 20  | 0.001317263 | 0.285465092 | 0.444844525 | 4  |
| 1 | 20  | 0.001317263 | 0.285465092 | 0.444844525 | 4  |
| 1 | 20  | 0.001317263 | 0.285465092 | 0.444844525 | 1  |
| 1 | 20  | 0.001317263 | 0.285465092 | 0.444844525 | 1  |
| 3 | 111 | 0.007310808 | 0.286504332 | 0.444844525 | 6  |
| 1 | 21  | 0.001383126 | 0.297381517 | 0.444844525 | 1  |
| 1 | 21  | 0.001383126 | 0.297381517 | 0.444844525 | 1  |
| 1 | 21  | 0.001383126 | 0.297381517 | 0.444844525 | 4  |
| 1 | 21  | 0.001383126 | 0.297381517 | 0.444844525 | 3  |
| 1 | 21  | 0.001383126 | 0.297381517 | 0.444844525 | 3  |
| 2 | 66  | 0.004346967 | 0.304159286 | 0.444844525 | 1  |
| 2 | 66  | 0.004346967 | 0.304159286 | 0.444844525 | 1  |
| 2 | 66  | 0.004346967 | 0.304159286 | 0.444844525 | 1  |
| 1 | 22  | 0.001448989 | 0.309099976 | 0.444844525 | 3  |
| 1 | 22  | 0.001448989 | 0.309099976 | 0.444844525 | 1  |
| 1 | 22  | 0.001448989 | 0.309099976 | 0.444844525 | 2  |
| 1 | 22  | 0.001448989 | 0.309099976 | 0.444844525 | 1  |
| 1 | 22  | 0.001448989 | 0.309099976 | 0.444844525 | 2  |
| 3 | 116 | 0.007640124 | 0.309259403 | 0.444844525 | 11 |
| 2 | 68  | 0.004478693 | 0.316456543 | 0.444844525 | 2  |
| 3 | 118 | 0.00777185  | 0.318382793 | 0.444844525 | 6  |
| 1 | 23  | 0.001514852 | 0.320623746 | 0.444844525 | 10 |
| 1 | 23  | 0.001514852 | 0.320623746 | 0.444844525 | 1  |

## E7\_severemild\_down\_reactome

|   |     |             |             |             |    |
|---|-----|-------------|-------------|-------------|----|
| 1 | 23  | 0.001514852 | 0.320623746 | 0.444844525 | 1  |
| 2 | 69  | 0.004544556 | 0.322587133 | 0.444844525 | 10 |
| 6 | 279 | 0.018375815 | 0.328586338 | 0.444844525 | 11 |
| 1 | 24  | 0.001580715 | 0.331956047 | 0.444844525 | 6  |
| 1 | 24  | 0.001580715 | 0.331956047 | 0.444844525 | 1  |
| 1 | 24  | 0.001580715 | 0.331956047 | 0.444844525 | 1  |
| 2 | 71  | 0.004676283 | 0.33480581  | 0.444844525 | 2  |
| 1 | 25  | 0.001646578 | 0.34310005  | 0.444844525 | 2  |
| 1 | 25  | 0.001646578 | 0.34310005  | 0.444844525 | 1  |
| 1 | 25  | 0.001646578 | 0.34310005  | 0.444844525 | 1  |
| 2 | 73  | 0.004808009 | 0.346959775 | 0.444844525 | 6  |
| 2 | 73  | 0.004808009 | 0.346959775 | 0.444844525 | 1  |
| 1 | 26  | 0.001712442 | 0.35405887  | 0.444844525 | 2  |
| 1 | 26  | 0.001712442 | 0.35405887  | 0.444844525 | 3  |
| 1 | 27  | 0.001778305 | 0.364835574 | 0.444844525 | 5  |
| 1 | 27  | 0.001778305 | 0.364835574 | 0.444844525 | 4  |
| 1 | 27  | 0.001778305 | 0.364835574 | 0.444844525 | 2  |
| 3 | 129 | 0.008496345 | 0.368498671 | 0.444844525 | 26 |
| 1 | 28  | 0.001844168 | 0.375433175 | 0.444844525 | 7  |
| 1 | 28  | 0.001844168 | 0.375433175 | 0.444844525 | 3  |
| 1 | 28  | 0.001844168 | 0.375433175 | 0.444844525 | 3  |
| 1 | 28  | 0.001844168 | 0.375433175 | 0.444844525 | 7  |
| 1 | 28  | 0.001844168 | 0.375433175 | 0.444844525 | 2  |
| 1 | 28  | 0.001844168 | 0.375433175 | 0.444844525 | 1  |
| 2 | 78  | 0.005137325 | 0.377003866 | 0.444844525 | 12 |
| 2 | 78  | 0.005137325 | 0.377003866 | 0.444844525 | 10 |
| 2 | 79  | 0.005203188 | 0.382946273 | 0.444844525 | 2  |
| 1 | 29  | 0.001910031 | 0.385854639 | 0.444844525 | 4  |
| 1 | 29  | 0.001910031 | 0.385854639 | 0.444844525 | 1  |
| 1 | 29  | 0.001910031 | 0.385854639 | 0.444844525 | 1  |
| 3 | 134 | 0.00882566  | 0.391101016 | 0.444844525 | 3  |
| 1 | 30  | 0.001975894 | 0.396102882 | 0.444844525 | 5  |
| 1 | 30  | 0.001975894 | 0.396102882 | 0.444844525 | 1  |
| 1 | 30  | 0.001975894 | 0.396102882 | 0.444844525 | 1  |
| 1 | 30  | 0.001975894 | 0.396102882 | 0.444844525 | 1  |
| 1 | 30  | 0.001975894 | 0.396102882 | 0.444844525 | 2  |
| 6 | 302 | 0.019890667 | 0.396813778 | 0.444844525 | 6  |
| 1 | 31  | 0.002041757 | 0.406180772 | 0.444844525 | 5  |
| 1 | 31  | 0.002041757 | 0.406180772 | 0.444844525 | 2  |
| 1 | 31  | 0.002041757 | 0.406180772 | 0.444844525 | 2  |
| 1 | 31  | 0.002041757 | 0.406180772 | 0.444844525 | 2  |
| 1 | 31  | 0.002041757 | 0.406180772 | 0.444844525 | 4  |
| 1 | 31  | 0.002041757 | 0.406180772 | 0.444844525 | 1  |
| 1 | 31  | 0.002041757 | 0.406180772 | 0.444844525 | 2  |
| 1 | 31  | 0.002041757 | 0.406180772 | 0.444844525 | 1  |
| 1 | 31  | 0.002041757 | 0.406180772 | 0.444844525 | 1  |
| 2 | 83  | 0.00546664  | 0.406465009 | 0.444844525 | 2  |
| 2 | 84  | 0.005532503 | 0.412278025 | 0.444844525 | 2  |
| 3 | 139 | 0.009154976 | 0.413499057 | 0.444844525 | 5  |
| 1 | 32  | 0.00210762  | 0.41609113  | 0.444844525 | 3  |
| 1 | 32  | 0.00210762  | 0.41609113  | 0.444844525 | 2  |
| 3 | 140 | 0.009220839 | 0.417948908 | 0.444844525 | 26 |
| 3 | 141 | 0.009286702 | 0.422387799 | 0.444844525 | 3  |

## E7\_severemild\_down\_reactome

|   |     |             |             |             |    |
|---|-----|-------------|-------------|-------------|----|
| 2 | 86  | 0.00566423  | 0.423818989 | 0.444844525 | 3  |
| 1 | 33  | 0.002173484 | 0.42583673  | 0.444844525 | 3  |
| 1 | 33  | 0.002173484 | 0.42583673  | 0.444844525 | 4  |
| 1 | 33  | 0.002173484 | 0.42583673  | 0.444844525 | 1  |
| 1 | 33  | 0.002173484 | 0.42583673  | 0.444844525 | 1  |
| 5 | 257 | 0.016926826 | 0.433237537 | 0.444844525 | 7  |
| 2 | 88  | 0.005795956 | 0.435242168 | 0.444844525 | 16 |
| 1 | 34  | 0.002239347 | 0.435420301 | 0.444844525 | 2  |
| 1 | 34  | 0.002239347 | 0.435420301 | 0.444844525 | 2  |
| 1 | 34  | 0.002239347 | 0.435420301 | 0.444844525 | 1  |
| 6 | 316 | 0.020812751 | 0.438346444 | 0.444844525 | 9  |
| 2 | 89  | 0.005861819 | 0.440908064 | 0.444844525 | 5  |
| 1 | 35  | 0.00230521  | 0.444844525 | 0.444844525 | 5  |
| 1 | 35  | 0.00230521  | 0.444844525 | 0.444844525 | 2  |
| 1 | 35  | 0.00230521  | 0.444844525 | 0.444844525 | 1  |
| 1 | 35  | 0.00230521  | 0.444844525 | 0.444844525 | 1  |
| 1 | 35  | 0.00230521  | 0.444844525 | 0.444844525 | 1  |
| 5 | 261 | 0.017190279 | 0.446290933 | 0.446290933 | 17 |
| 2 | 90  | 0.005927682 | 0.446542739 | 0.446542739 | 10 |
| 3 | 147 | 0.009681881 | 0.448767765 | 0.448767765 | 4  |
| 1 | 36  | 0.002371073 | 0.454112043 | 0.454112043 | 10 |
| 1 | 36  | 0.002371073 | 0.454112043 | 0.454112043 | 5  |
| 1 | 36  | 0.002371073 | 0.454112043 | 0.454112043 | 2  |
| 1 | 37  | 0.002436936 | 0.463225449 | 0.463225449 | 2  |
| 6 | 326 | 0.021471382 | 0.467710516 | 0.467710516 | 14 |
| 1 | 38  | 0.002502799 | 0.472187297 | 0.472187297 | 1  |
| 1 | 38  | 0.002502799 | 0.472187297 | 0.472187297 | 2  |
| 1 | 38  | 0.002502799 | 0.472187297 | 0.472187297 | 4  |
| 1 | 39  | 0.002568662 | 0.481000097 | 0.481000097 | 13 |
| 1 | 39  | 0.002568662 | 0.481000097 | 0.481000097 | 1  |
| 1 | 39  | 0.002568662 | 0.481000097 | 0.481000097 | 1  |
| 1 | 40  | 0.002634525 | 0.489666319 | 0.489666319 | 1  |
| 1 | 40  | 0.002634525 | 0.489666319 | 0.489666319 | 1  |
| 2 | 99  | 0.006520451 | 0.495770194 | 0.495770194 | 5  |
| 2 | 99  | 0.006520451 | 0.495770194 | 0.495770194 | 1  |
| 1 | 41  | 0.002700389 | 0.498188391 | 0.498188391 | 6  |
| 1 | 41  | 0.002700389 | 0.498188391 | 0.498188391 | 1  |
| 1 | 41  | 0.002700389 | 0.498188391 | 0.498188391 | 1  |
| 1 | 41  | 0.002700389 | 0.498188391 | 0.498188391 | 1  |
| 1 | 42  | 0.002766252 | 0.506568702 | 0.506568702 | 2  |
| 1 | 43  | 0.002832115 | 0.5148096   | 0.5148096   | 1  |
| 1 | 43  | 0.002832115 | 0.5148096   | 0.5148096   | 5  |
| 1 | 43  | 0.002832115 | 0.5148096   | 0.5148096   | 2  |
| 1 | 43  | 0.002832115 | 0.5148096   | 0.5148096   | 2  |
| 1 | 43  | 0.002832115 | 0.5148096   | 0.5148096   | 3  |
| 1 | 43  | 0.002832115 | 0.5148096   | 0.5148096   | 1  |
| 1 | 43  | 0.002832115 | 0.5148096   | 0.5148096   | 1  |
| 2 | 104 | 0.006849766 | 0.521895985 | 0.521895985 | 11 |
| 1 | 44  | 0.002897978 | 0.522913396 | 0.522913396 | 4  |
| 1 | 44  | 0.002897978 | 0.522913396 | 0.522913396 | 8  |
| 1 | 44  | 0.002897978 | 0.522913396 | 0.522913396 | 1  |
| 1 | 44  | 0.002897978 | 0.522913396 | 0.522913396 | 3  |
| 4 | 226 | 0.014885069 | 0.526855754 | 0.526855754 | 16 |

## E7\_severemild\_down\_reactome

|    |      |             |             |             |     |
|----|------|-------------|-------------|-------------|-----|
| 1  | 45   | 0.002963841 | 0.530882361 | 0.530882361 | 3   |
| 1  | 45   | 0.002963841 | 0.530882361 | 0.530882361 | 1   |
| 2  | 106  | 0.006981492 | 0.532090589 | 0.532090589 | 3   |
| 2  | 106  | 0.006981492 | 0.532090589 | 0.532090589 | 2   |
| 17 | 1012 | 0.066653494 | 0.535265825 | 0.535265825 | 28  |
| 1  | 46   | 0.003029704 | 0.538718732 | 0.538718732 | 10  |
| 1  | 46   | 0.003029704 | 0.538718732 | 0.538718732 | 1   |
| 1  | 46   | 0.003029704 | 0.538718732 | 0.538718732 | 1   |
| 2  | 108  | 0.007113219 | 0.542136513 | 0.542136513 | 7   |
| 1  | 47   | 0.003095567 | 0.546424704 | 0.546424704 | 1   |
| 1  | 47   | 0.003095567 | 0.546424704 | 0.546424704 | 1   |
| 1  | 48   | 0.003161431 | 0.55400244  | 0.55400244  | 5   |
| 1  | 48   | 0.003161431 | 0.55400244  | 0.55400244  | 1   |
| 3  | 174  | 0.011460186 | 0.560411091 | 0.560411091 | 29  |
| 1  | 49   | 0.003227294 | 0.561454066 | 0.561454066 | 5   |
| 1  | 49   | 0.003227294 | 0.561454066 | 0.561454066 | 8   |
| 8  | 484  | 0.031877758 | 0.567387817 | 0.567387817 | 16  |
| 1  | 50   | 0.003293157 | 0.568781672 | 0.568781672 | 2   |
| 1  | 50   | 0.003293157 | 0.568781672 | 0.568781672 | 2   |
| 1  | 50   | 0.003293157 | 0.568781672 | 0.568781672 | 3   |
| 1  | 50   | 0.003293157 | 0.568781672 | 0.568781672 | 1   |
| 1  | 51   | 0.00335902  | 0.575987313 | 0.575987313 | 19  |
| 1  | 51   | 0.00335902  | 0.575987313 | 0.575987313 | 1   |
| 1  | 51   | 0.00335902  | 0.575987313 | 0.575987313 | 1   |
| 1  | 52   | 0.003424883 | 0.583073013 | 0.583073013 | 5   |
| 1  | 53   | 0.003490746 | 0.590040761 | 0.590040761 | 1   |
| 2  | 118  | 0.00777185  | 0.590097633 | 0.590097633 | 2   |
| 1  | 54   | 0.003556609 | 0.596892511 | 0.596892511 | 5   |
| 1  | 54   | 0.003556609 | 0.596892511 | 0.596892511 | 5   |
| 1  | 54   | 0.003556609 | 0.596892511 | 0.596892511 | 5   |
| 1  | 54   | 0.003556609 | 0.596892511 | 0.596892511 | 5   |
| 1  | 55   | 0.003622473 | 0.603630188 | 0.603630188 | 5   |
| 1  | 55   | 0.003622473 | 0.603630188 | 0.603630188 | 11  |
| 1  | 55   | 0.003622473 | 0.603630188 | 0.603630188 | 1   |
| 1  | 55   | 0.003622473 | 0.603630188 | 0.603630188 | 1   |
| 1  | 56   | 0.003688336 | 0.610255683 | 0.610255683 | 25  |
| 1  | 56   | 0.003688336 | 0.610255683 | 0.610255683 | 1   |
| 1  | 57   | 0.003754199 | 0.616770857 | 0.616770857 | 3   |
| 1  | 57   | 0.003754199 | 0.616770857 | 0.616770857 | 5   |
| 1  | 57   | 0.003754199 | 0.616770857 | 0.616770857 | 3   |
| 2  | 124  | 0.008167029 | 0.617039984 | 0.617039984 | 4   |
| 2  | 124  | 0.008167029 | 0.617039984 | 0.617039984 | 2   |
| 1  | 58   | 0.003820062 | 0.62317754  | 0.62317754  | 4   |
| 1  | 58   | 0.003820062 | 0.62317754  | 0.62317754  | 1   |
| 4  | 257  | 0.016926826 | 0.627788328 | 0.627788328 | 10  |
| 1  | 59   | 0.003885925 | 0.629477531 | 0.629477531 | 1   |
| 1  | 59   | 0.003885925 | 0.629477531 | 0.629477531 | 9   |
| 1  | 59   | 0.003885925 | 0.629477531 | 0.629477531 | 1   |
| 1  | 59   | 0.003885925 | 0.629477531 | 0.629477531 | 1   |
| 3  | 193  | 0.012711585 | 0.630312304 | 0.630312304 | 16  |
| 3  | 193  | 0.012711585 | 0.630312304 | 0.630312304 | 3   |
| 3  | 193  | 0.012711585 | 0.630312304 | 0.630312304 | 3   |
| 49 | 3023 | 0.199104261 | 0.633932172 | 0.633932172 | 224 |

## E7\_severemild\_down\_reactome

|    |     |             |             |             |    |
|----|-----|-------------|-------------|-------------|----|
| 1  | 60  | 0.003951788 | 0.635672601 | 0.635672601 | 1  |
| 2  | 129 | 0.008496345 | 0.638441015 | 0.638441015 | 5  |
| 2  | 129 | 0.008496345 | 0.638441015 | 0.638441015 | 2  |
| 1  | 61  | 0.004017651 | 0.64176449  | 0.64176449  | 2  |
| 2  | 130 | 0.008562208 | 0.642607236 | 0.642607236 | 2  |
| 1  | 62  | 0.004083514 | 0.64775491  | 0.64775491  | 1  |
| 1  | 63  | 0.004149378 | 0.653645544 | 0.653645544 | 1  |
| 1  | 64  | 0.004215241 | 0.659438048 | 0.659438048 | 3  |
| 1  | 64  | 0.004215241 | 0.659438048 | 0.659438048 | 1  |
| 1  | 64  | 0.004215241 | 0.659438048 | 0.659438048 | 2  |
| 2  | 137 | 0.00902325  | 0.670718316 | 0.670718316 | 2  |
| 1  | 66  | 0.004346967 | 0.670735153 | 0.670735153 | 3  |
| 1  | 67  | 0.00441283  | 0.676242931 | 0.676242931 | 5  |
| 1  | 67  | 0.00441283  | 0.676242931 | 0.676242931 | 1  |
| 11 | 725 | 0.047750774 | 0.676427287 | 0.676427287 | 29 |
| 1  | 68  | 0.004478693 | 0.681658932 | 0.681658932 | 2  |
| 1  | 68  | 0.004478693 | 0.681658932 | 0.681658932 | 1  |
| 1  | 68  | 0.004478693 | 0.681658932 | 0.681658932 | 1  |
| 1  | 68  | 0.004478693 | 0.681658932 | 0.681658932 | 1  |
| 2  | 141 | 0.009286702 | 0.685965701 | 0.685965701 | 2  |
| 1  | 69  | 0.004544556 | 0.686984681 | 0.686984681 | 1  |
| 1  | 70  | 0.00461042  | 0.692221675 | 0.692221675 | 2  |
| 1  | 70  | 0.00461042  | 0.692221675 | 0.692221675 | 1  |
| 7  | 479 | 0.031548442 | 0.696036113 | 0.696036113 | 10 |
| 1  | 71  | 0.004676283 | 0.697371388 | 0.697371388 | 2  |
| 1  | 71  | 0.004676283 | 0.697371388 | 0.697371388 | 2  |
| 1  | 71  | 0.004676283 | 0.697371388 | 0.697371388 | 2  |
| 1  | 72  | 0.004742146 | 0.702435269 | 0.702435269 | 1  |
| 1  | 73  | 0.004808009 | 0.707414743 | 0.707414743 | 5  |
| 2  | 149 | 0.009813607 | 0.71472604  | 0.71472604  | 4  |
| 1  | 75  | 0.004939735 | 0.717126052 | 0.717126052 | 1  |
| 1  | 75  | 0.004939735 | 0.717126052 | 0.717126052 | 1  |
| 2  | 150 | 0.00987947  | 0.718161903 | 0.718161903 | 17 |
| 2  | 150 | 0.00987947  | 0.718161903 | 0.718161903 | 13 |
| 9  | 621 | 0.040901008 | 0.718652422 | 0.718652422 | 79 |
| 1  | 76  | 0.005005598 | 0.721860621 | 0.721860621 | 1  |
| 1  | 76  | 0.005005598 | 0.721860621 | 0.721860621 | 1  |
| 1  | 78  | 0.005137325 | 0.731094254 | 0.731094254 | 1  |
| 2  | 154 | 0.010142923 | 0.731559948 | 0.731559948 | 2  |
| 2  | 154 | 0.010142923 | 0.731559948 | 0.731559948 | 4  |
| 7  | 498 | 0.032799842 | 0.733403291 | 0.733403291 | 42 |
| 1  | 79  | 0.005203188 | 0.735595918 | 0.735595918 | 3  |
| 1  | 79  | 0.005203188 | 0.735595918 | 0.735595918 | 1  |
| 1  | 80  | 0.005269051 | 0.740022512 | 0.740022512 | 1  |
| 1  | 80  | 0.005269051 | 0.740022512 | 0.740022512 | 2  |
| 1  | 80  | 0.005269051 | 0.740022512 | 0.740022512 | 1  |
| 1  | 80  | 0.005269051 | 0.740022512 | 0.740022512 | 1  |
| 1  | 81  | 0.005334914 | 0.744375282 | 0.744375282 | 4  |
| 1  | 81  | 0.005334914 | 0.744375282 | 0.744375282 | 2  |
| 1  | 81  | 0.005334914 | 0.744375282 | 0.744375282 | 1  |
| 1  | 81  | 0.005334914 | 0.744375282 | 0.744375282 | 2  |
| 2  | 158 | 0.010406376 | 0.744415189 | 0.744415189 | 6  |
| 3  | 232 | 0.015280248 | 0.7485792   | 0.7485792   | 7  |

## E7\_severemild\_down\_reactome

|    |     |             |             |             |    |
|----|-----|-------------|-------------|-------------|----|
| 1  | 82  | 0.005400777 | 0.748655456 | 0.748655456 | 2  |
| 1  | 82  | 0.005400777 | 0.748655456 | 0.748655456 | 1  |
| 1  | 83  | 0.005466664 | 0.752864239 | 0.752864239 | 1  |
| 3  | 234 | 0.015411974 | 0.753738645 | 0.753738645 | 3  |
| 10 | 709 | 0.046696964 | 0.755669747 | 0.755669747 | 28 |
| 2  | 164 | 0.010801554 | 0.762710318 | 0.762710318 | 26 |
| 1  | 86  | 0.00566423  | 0.765074008 | 0.765074008 | 2  |
| 1  | 86  | 0.00566423  | 0.765074008 | 0.765074008 | 1  |
| 2  | 165 | 0.010867418 | 0.76564712  | 0.76564712  | 2  |
| 2  | 166 | 0.010933281 | 0.768552417 | 0.768552417 | 13 |
| 1  | 87  | 0.005730093 | 0.769008894 | 0.769008894 | 21 |
| 1  | 88  | 0.005795956 | 0.772878128 | 0.772878128 | 3  |
| 1  | 88  | 0.005795956 | 0.772878128 | 0.772878128 | 1  |
| 1  | 89  | 0.005861819 | 0.7766828   | 0.7766828   | 3  |
| 1  | 89  | 0.005861819 | 0.7766828   | 0.7766828   | 1  |
| 1  | 91  | 0.005993545 | 0.784102732 | 0.784102732 | 2  |
| 1  | 92  | 0.006059409 | 0.787720085 | 0.787720085 | 1  |
| 2  | 173 | 0.011394323 | 0.788026771 | 0.788026771 | 1  |
| 1  | 93  | 0.006125272 | 0.791277064 | 0.791277064 | 29 |
| 2  | 175 | 0.011526049 | 0.79332058  | 0.79332058  | 1  |
| 1  | 94  | 0.006191135 | 0.794774671 | 0.794774671 | 4  |
| 1  | 94  | 0.006191135 | 0.794774671 | 0.794774671 | 4  |
| 1  | 94  | 0.006191135 | 0.794774671 | 0.794774671 | 1  |
| 1  | 94  | 0.006191135 | 0.794774671 | 0.794774671 | 1  |
| 11 | 803 | 0.052888099 | 0.794950457 | 0.794950457 | 52 |
| 1  | 95  | 0.006256998 | 0.798213895 | 0.798213895 | 1  |
| 2  | 177 | 0.011657775 | 0.798497715 | 0.798497715 | 1  |
| 1  | 96  | 0.006322861 | 0.801595705 | 0.801595705 | 1  |
| 1  | 96  | 0.006322861 | 0.801595705 | 0.801595705 | 1  |
| 1  | 96  | 0.006322861 | 0.801595705 | 0.801595705 | 1  |
| 4  | 328 | 0.021603109 | 0.802379918 | 0.802379918 | 15 |
| 2  | 179 | 0.011789501 | 0.803560071 | 0.803560071 | 11 |
| 2  | 181 | 0.011921228 | 0.808509544 | 0.808509544 | 22 |
| 1  | 99  | 0.006520451 | 0.811406125 | 0.811406125 | 6  |
| 1  | 100 | 0.006586314 | 0.814567672 | 0.814567672 | 1  |
| 2  | 185 | 0.01218468  | 0.818077436 | 0.818077436 | 2  |
| 1  | 102 | 0.00671804  | 0.820733261 | 0.820733261 | 24 |
| 1  | 102 | 0.00671804  | 0.820733261 | 0.820733261 | 1  |
| 1  | 104 | 0.006849766 | 0.826694621 | 0.826694621 | 2  |
| 3  | 269 | 0.017717184 | 0.830921586 | 0.830921586 | 3  |
| 1  | 107 | 0.007047356 | 0.835268417 | 0.835268417 | 2  |
| 1  | 107 | 0.007047356 | 0.835268417 | 0.835268417 | 2  |
| 1  | 107 | 0.007047356 | 0.835268417 | 0.835268417 | 3  |
| 1  | 107 | 0.007047356 | 0.835268417 | 0.835268417 | 1  |
| 5  | 420 | 0.027662517 | 0.835674618 | 0.835674618 | 10 |
| 1  | 108 | 0.007113219 | 0.838031396 | 0.838031396 | 1  |
| 2  | 194 | 0.012777448 | 0.838060373 | 0.838060373 | 2  |
| 1  | 109 | 0.007179082 | 0.84074821  | 0.84074821  | 1  |
| 1  | 110 | 0.007244945 | 0.84341963  | 0.84341963  | 1  |
| 1  | 111 | 0.007310808 | 0.846046409 | 0.846046409 | 4  |
| 1  | 111 | 0.007310808 | 0.846046409 | 0.846046409 | 2  |
| 1  | 113 | 0.007442534 | 0.851169009 | 0.851169009 | 1  |
| 1  | 114 | 0.007508398 | 0.853666279 | 0.853666279 | 4  |

## E7\_severemild\_down\_reactome

|    |      |             |             |             |    |
|----|------|-------------|-------------|-------------|----|
| 1  | 116  | 0.007640124 | 0.858536291 | 0.858536291 | 7  |
| 1  | 116  | 0.007640124 | 0.858536291 | 0.858536291 | 7  |
| 1  | 120  | 0.007903576 | 0.867797266 | 0.867797266 | 4  |
| 1  | 120  | 0.007903576 | 0.867797266 | 0.867797266 | 4  |
| 1  | 121  | 0.00796944  | 0.870016548 | 0.870016548 | 1  |
| 17 | 1279 | 0.084238951 | 0.871565394 | 0.871565394 | 96 |
| 1  | 125  | 0.008232892 | 0.878528695 | 0.878528695 | 1  |
| 1  | 126  | 0.008298755 | 0.8805685   | 0.8805685   | 2  |
| 1  | 127  | 0.008364618 | 0.882574185 | 0.882574185 | 1  |
| 1  | 129  | 0.008496345 | 0.886485454 | 0.886485454 | 2  |
| 5  | 460  | 0.030297043 | 0.88727624  | 0.88727624  | 14 |
| 1  | 131  | 0.008628071 | 0.890266939 | 0.890266939 | 1  |
| 4  | 387  | 0.025489034 | 0.891216298 | 0.891216298 | 10 |
| 1  | 132  | 0.008693934 | 0.892110359 | 0.892110359 | 1  |
| 2  | 227  | 0.014950932 | 0.895451964 | 0.895451964 | 3  |
| 1  | 134  | 0.00882566  | 0.895705167 | 0.895705167 | 4  |
| 1  | 136  | 0.008957387 | 0.899180653 | 0.899180653 | 3  |
| 7  | 621  | 0.040901008 | 0.899540539 | 0.899540539 | 59 |
| 2  | 230  | 0.015148521 | 0.899606358 | 0.899606358 | 2  |
| 3  | 315  | 0.020746888 | 0.900190529 | 0.900190529 | 4  |
| 2  | 235  | 0.015477837 | 0.906191127 | 0.906191127 | 15 |
| 3  | 321  | 0.021142067 | 0.907043874 | 0.907043874 | 3  |
| 1  | 144  | 0.009484292 | 0.911966359 | 0.911966359 | 2  |
| 1  | 147  | 0.009681881 | 0.916332869 | 0.916332869 | 3  |
| 1  | 147  | 0.009681881 | 0.916332869 | 0.916332869 | 1  |
| 1  | 147  | 0.009681881 | 0.916332869 | 0.916332869 | 1  |
| 1  | 148  | 0.009747744 | 0.917739887 | 0.917739887 | 4  |
| 12 | 1005 | 0.066192452 | 0.918245142 | 0.918245142 | 24 |
| 1  | 149  | 0.009813607 | 0.919123334 | 0.919123334 | 1  |
| 1  | 153  | 0.01007706  | 0.924429189 | 0.924429189 | 1  |
| 12 | 1023 | 0.067377989 | 0.928579527 | 0.928579527 | 24 |
| 1  | 157  | 0.010340512 | 0.929388233 | 0.929388233 | 2  |
| 1  | 157  | 0.010340512 | 0.929388233 | 0.929388233 | 2  |
| 1  | 157  | 0.010340512 | 0.929388233 | 0.929388233 | 2  |
| 3  | 344  | 0.022656919 | 0.929550167 | 0.929550167 | 7  |
| 2  | 256  | 0.016860963 | 0.929684731 | 0.929684731 | 3  |
| 1  | 158  | 0.010406376 | 0.930576484 | 0.930576484 | 2  |
| 2  | 258  | 0.016992689 | 0.931607167 | 0.931607167 | 4  |
| 2  | 258  | 0.016992689 | 0.931607167 | 0.931607167 | 4  |
| 2  | 258  | 0.016992689 | 0.931607167 | 0.931607167 | 2  |
| 1  | 159  | 0.010472239 | 0.931744817 | 0.931744817 | 1  |
| 1  | 159  | 0.010472239 | 0.931744817 | 0.931744817 | 7  |
| 4  | 434  | 0.028584601 | 0.934820005 | 0.934820005 | 9  |
| 1  | 166  | 0.010933281 | 0.939392673 | 0.939392673 | 10 |
| 1  | 167  | 0.010999144 | 0.940413177 | 0.940413177 | 1  |
| 1  | 168  | 0.011065007 | 0.941416563 | 0.941416563 | 5  |
| 1  | 168  | 0.011065007 | 0.941416563 | 0.941416563 | 2  |
| 1  | 169  | 0.01113087  | 0.942403118 | 0.942403118 | 3  |
| 1  | 169  | 0.01113087  | 0.942403118 | 0.942403118 | 1  |
| 3  | 368  | 0.024237634 | 0.947621471 | 0.947621471 | 3  |
| 1  | 175  | 0.011526049 | 0.947984426 | 0.947984426 | 2  |
| 1  | 175  | 0.011526049 | 0.947984426 | 0.947984426 | 1  |
| 2  | 280  | 0.018441678 | 0.949724072 | 0.949724072 | 2  |

## E7\_severemild\_down\_reactome

|    |      |             |             |             |    |
|----|------|-------------|-------------|-------------|----|
| 2  | 284  | 0.018705131 | 0.952484937 | 0.952484937 | 3  |
| 3  | 382  | 0.025159718 | 0.956074119 | 0.956074119 | 5  |
| 1  | 189  | 0.012448133 | 0.959000535 | 0.959000535 | 4  |
| 1  | 189  | 0.012448133 | 0.959000535 | 0.959000535 | 2  |
| 1  | 191  | 0.012579859 | 0.960371714 | 0.960371714 | 1  |
| 1  | 192  | 0.012645722 | 0.961040077 | 0.961040077 | 2  |
| 1  | 195  | 0.012843312 | 0.962978538 | 0.962978538 | 2  |
| 1  | 198  | 0.013040901 | 0.964820911 | 0.964820911 | 1  |
| 7  | 734  | 0.048343542 | 0.965152957 | 0.965152957 | 50 |
| 1  | 202  | 0.013304354 | 0.967136103 | 0.967136103 | 11 |
| 2  | 315  | 0.020746888 | 0.969481206 | 0.969481206 | 4  |
| 5  | 585  | 0.038529935 | 0.969599995 | 0.969599995 | 40 |
| 1  | 208  | 0.013699532 | 0.970327376 | 0.970327376 | 1  |
| 1  | 210  | 0.013831259 | 0.97132098  | 0.97132098  | 1  |
| 1  | 211  | 0.013897122 | 0.971805283 | 0.971805283 | 6  |
| 1  | 212  | 0.013962985 | 0.972281439 | 0.972281439 | 1  |
| 2  | 322  | 0.02120793  | 0.972416042 | 0.972416042 | 11 |
| 1  | 214  | 0.014094711 | 0.973209855 | 0.973209855 | 1  |
| 2  | 329  | 0.021668972 | 0.975078435 | 0.975078435 | 11 |
| 1  | 232  | 0.015280248 | 0.980288231 | 0.980288231 | 3  |
| 1  | 235  | 0.015477837 | 0.981271553 | 0.981271553 | 1  |
| 3  | 456  | 0.03003359  | 0.983234584 | 0.983234584 | 28 |
| 5  | 639  | 0.042086544 | 0.983602696 | 0.983602696 | 13 |
| 1  | 249  | 0.016399921 | 0.985252055 | 0.985252055 | 2  |
| 1  | 250  | 0.016465784 | 0.985501748 | 0.985501748 | 2  |
| 5  | 666  | 0.043864849 | 0.988074407 | 0.988074407 | 5  |
| 2  | 380  | 0.025027992 | 0.98823173  | 0.98823173  | 11 |
| 3  | 490  | 0.032272937 | 0.989402478 | 0.989402478 | 7  |
| 1  | 270  | 0.017783047 | 0.989698663 | 0.989698663 | 2  |
| 4  | 596  | 0.039254429 | 0.990749958 | 0.990749958 | 41 |
| 2  | 424  | 0.02792597  | 0.993922113 | 0.993922113 | 13 |
| 2  | 431  | 0.028387012 | 0.994534118 | 0.994534118 | 6  |
| 1  | 331  | 0.021800698 | 0.996377788 | 0.996377788 | 1  |
| 1  | 332  | 0.021866561 | 0.99643945  | 0.99643945  | 10 |
| 1  | 338  | 0.02226174  | 0.996788074 | 0.996788074 | 1  |
| 14 | 1588 | 0.104590661 | 0.998245142 | 0.998245142 | 52 |
| 13 | 1512 | 0.099585062 | 0.998309942 | 0.998309942 | 24 |
| 1  | 381  | 0.025093855 | 0.998467092 | 0.998467092 | 5  |
| 6  | 971  | 0.063953105 | 0.999153541 | 0.999153541 | 11 |
| 3  | 668  | 0.043996575 | 0.999153967 | 0.999153967 | 6  |
| 1  | 416  | 0.027399065 | 0.999161807 | 0.999161807 | 8  |
| 14 | 1730 | 0.113943226 | 0.999604579 | 0.999604579 | 52 |
| 24 | 2596 | 0.170980702 | 0.999831511 | 0.999831511 | 89 |
| 15 | 1893 | 0.124678917 | 0.999837773 | 0.999837773 | 56 |
| 3  | 828  | 0.054534677 | 0.999923944 | 0.999923944 | 6  |
| 9  | 1446 | 0.095238095 | 0.999930393 | 0.999930393 | 19 |
| 1  | 789  | 0.051966015 | 0.999998769 | 0.999998769 | 2  |
| 7  | 1604 | 0.105644471 | 0.999999476 | 0.999999476 | 6  |
| 11 | 2214 | 0.145820984 | 0.999999974 | 0.999999974 | 10 |
| 1  | 1262 | 0.083119278 | 1           | 1           | 3  |
| 22 | 3641 | 0.23980768  | 1           | 1           | 63 |

## E7\_severemild\_down\_reactome

| Reactions total | Reactions ratio | Species identifier | Species name |
|-----------------|-----------------|--------------------|--------------|
| 15              | 0.001065492     | 9606               | Homo sapiens |
| 1645            | 0.116848984     | 9606               | Homo sapiens |
| 726             | 0.051569825     | 9606               | Homo sapiens |
| 25              | 0.00177582      | 9606               | Homo sapiens |
| 74              | 0.005256428     | 9606               | Homo sapiens |
| 19              | 0.001349624     | 9606               | Homo sapiens |
| 505             | 0.035871573     | 9606               | Homo sapiens |
| 47              | 0.003338542     | 9606               | Homo sapiens |
| 10              | 0.00071         | 9606               | Homo sapiens |
| 83              | 0.005895724     | 9606               | Homo sapiens |
| 185             | 0.013141071     | 9606               | Homo sapiens |
| 725             | 0.051498792     | 9606               | Homo sapiens |
| 18              | 0.001278591     | 9606               | Homo sapiens |
| 217             | 0.015414121     | 9606               | Homo sapiens |
| 5               | 0.000355        | 9606               | Homo sapiens |
| 5               | 0.000355        | 9606               | Homo sapiens |
| 4               | 0.000284        | 9606               | Homo sapiens |
| 74              | 0.005256428     | 9606               | Homo sapiens |
| 17              | 0.001207558     | 9606               | Homo sapiens |
| 392             | 0.027844864     | 9606               | Homo sapiens |
| 31              | 0.002202017     | 9606               | Homo sapiens |
| 15              | 0.001065492     | 9606               | Homo sapiens |
| 37              | 0.002628214     | 9606               | Homo sapiens |
| 7               | 0.000497        | 9606               | Homo sapiens |
| 4               | 0.000284        | 9606               | Homo sapiens |
| 42              | 0.002983378     | 9606               | Homo sapiens |
| 11              | 0.000781        | 9606               | Homo sapiens |
| 3               | 0.000213        | 9606               | Homo sapiens |
| 6               | 0.000426        | 9606               | Homo sapiens |
| 22              | 0.001562722     | 9606               | Homo sapiens |
| 48              | 0.003409575     | 9606               | Homo sapiens |
| 5               | 0.000355        | 9606               | Homo sapiens |
| 22              | 0.001562722     | 9606               | Homo sapiens |
| 59              | 0.004190936     | 9606               | Homo sapiens |
| 7               | 0.000497        | 9606               | Homo sapiens |
| 5               | 0.000355        | 9606               | Homo sapiens |
| 164             | 0.011649382     | 9606               | Homo sapiens |
| 14              | 0.000994        | 9606               | Homo sapiens |
| 175             | 0.012430743     | 9606               | Homo sapiens |
| 22              | 0.001562722     | 9606               | Homo sapiens |
| 22              | 0.001562722     | 9606               | Homo sapiens |
| 1               | 0.000071        | 9606               | Homo sapiens |
| 1               | 0.000071        | 9606               | Homo sapiens |
| 2               | 0.000142        | 9606               | Homo sapiens |
| 26              | 0.001846853     | 9606               | Homo sapiens |
| 102             | 0.007245347     | 9606               | Homo sapiens |
| 7               | 0.000497        | 9606               | Homo sapiens |
| 10              | 0.00071         | 9606               | Homo sapiens |
| 9               | 0.000639        | 9606               | Homo sapiens |
| 3               | 0.000213        | 9606               | Homo sapiens |
| 1               | 0.000071        | 9606               | Homo sapiens |
| 14              | 0.000994        | 9606               | Homo sapiens |

## E7\_severemild\_down\_reactome

|     |             |                   |
|-----|-------------|-------------------|
| 16  | 0.001136525 | 9606 Homo sapiens |
| 90  | 0.006392954 | 9606 Homo sapiens |
| 68  | 0.004830232 | 9606 Homo sapiens |
| 58  | 0.004119903 | 9606 Homo sapiens |
| 17  | 0.001207558 | 9606 Homo sapiens |
| 17  | 0.001207558 | 9606 Homo sapiens |
| 107 | 0.007600511 | 9606 Homo sapiens |
| 23  | 0.001633755 | 9606 Homo sapiens |
| 23  | 0.001633755 | 9606 Homo sapiens |
| 1   | 0.000071    | 9606 Homo sapiens |
| 2   | 0.000142    | 9606 Homo sapiens |
| 76  | 0.005398494 | 9606 Homo sapiens |
| 78  | 0.00554056  | 9606 Homo sapiens |
| 2   | 0.000142    | 9606 Homo sapiens |
| 9   | 0.000639    | 9606 Homo sapiens |
| 78  | 0.00554056  | 9606 Homo sapiens |
| 80  | 0.005682625 | 9606 Homo sapiens |
| 12  | 0.000852    | 9606 Homo sapiens |
| 92  | 0.006535019 | 9606 Homo sapiens |
| 24  | 0.001704788 | 9606 Homo sapiens |
| 3   | 0.000213    | 9606 Homo sapiens |
| 1   | 0.000071    | 9606 Homo sapiens |
| 4   | 0.000284    | 9606 Homo sapiens |
| 15  | 0.001065492 | 9606 Homo sapiens |
| 12  | 0.000852    | 9606 Homo sapiens |
| 53  | 0.003764739 | 9606 Homo sapiens |
| 8   | 0.000568    | 9606 Homo sapiens |
| 18  | 0.001278591 | 9606 Homo sapiens |
| 7   | 0.000497    | 9606 Homo sapiens |
| 2   | 0.000142    | 9606 Homo sapiens |
| 3   | 0.000213    | 9606 Homo sapiens |
| 5   | 0.000355    | 9606 Homo sapiens |
| 23  | 0.001633755 | 9606 Homo sapiens |
| 19  | 0.001349624 | 9606 Homo sapiens |
| 85  | 0.006037789 | 9606 Homo sapiens |
| 18  | 0.001278591 | 9606 Homo sapiens |
| 27  | 0.001917886 | 9606 Homo sapiens |
| 3   | 0.000213    | 9606 Homo sapiens |
| 9   | 0.000639    | 9606 Homo sapiens |
| 12  | 0.000852    | 9606 Homo sapiens |
| 2   | 0.000142    | 9606 Homo sapiens |
| 2   | 0.000142    | 9606 Homo sapiens |
| 198 | 0.014064498 | 9606 Homo sapiens |
| 13  | 0.000923    | 9606 Homo sapiens |
| 16  | 0.001136525 | 9606 Homo sapiens |
| 73  | 0.005185396 | 9606 Homo sapiens |
| 5   | 0.000355    | 9606 Homo sapiens |
| 75  | 0.005327461 | 9606 Homo sapiens |
| 79  | 0.005611593 | 9606 Homo sapiens |
| 24  | 0.001704788 | 9606 Homo sapiens |
| 26  | 0.001846853 | 9606 Homo sapiens |
| 2   | 0.000142    | 9606 Homo sapiens |
| 7   | 0.000497    | 9606 Homo sapiens |

## E7\_severemild\_down\_reactome

|     |             |                   |
|-----|-------------|-------------------|
| 45  | 0.003196477 | 9606 Homo sapiens |
| 70  | 0.004972297 | 9606 Homo sapiens |
| 72  | 0.005114363 | 9606 Homo sapiens |
| 80  | 0.005682625 | 9606 Homo sapiens |
| 19  | 0.001349624 | 9606 Homo sapiens |
| 36  | 0.002557181 | 9606 Homo sapiens |
| 2   | 0.000142    | 9606 Homo sapiens |
| 5   | 0.000355    | 9606 Homo sapiens |
| 3   | 0.000213    | 9606 Homo sapiens |
| 4   | 0.000284    | 9606 Homo sapiens |
| 15  | 0.001065492 | 9606 Homo sapiens |
| 15  | 0.001065492 | 9606 Homo sapiens |
| 52  | 0.003693706 | 9606 Homo sapiens |
| 2   | 0.000142    | 9606 Homo sapiens |
| 2   | 0.000142    | 9606 Homo sapiens |
| 3   | 0.000213    | 9606 Homo sapiens |
| 5   | 0.000355    | 9606 Homo sapiens |
| 7   | 0.000497    | 9606 Homo sapiens |
| 3   | 0.000213    | 9606 Homo sapiens |
| 5   | 0.000355    | 9606 Homo sapiens |
| 3   | 0.000213    | 9606 Homo sapiens |
| 7   | 0.000497    | 9606 Homo sapiens |
| 9   | 0.000639    | 9606 Homo sapiens |
| 5   | 0.000355    | 9606 Homo sapiens |
| 33  | 0.002344083 | 9606 Homo sapiens |
| 12  | 0.000852    | 9606 Homo sapiens |
| 2   | 0.000142    | 9606 Homo sapiens |
| 3   | 0.000213    | 9606 Homo sapiens |
| 4   | 0.000284    | 9606 Homo sapiens |
| 27  | 0.001917886 | 9606 Homo sapiens |
| 9   | 0.000639    | 9606 Homo sapiens |
| 5   | 0.000355    | 9606 Homo sapiens |
| 3   | 0.000213    | 9606 Homo sapiens |
| 3   | 0.000213    | 9606 Homo sapiens |
| 21  | 0.001491689 | 9606 Homo sapiens |
| 5   | 0.000355    | 9606 Homo sapiens |
| 7   | 0.000497    | 9606 Homo sapiens |
| 22  | 0.001562722 | 9606 Homo sapiens |
| 11  | 0.000781    | 9606 Homo sapiens |
| 44  | 0.003125444 | 9606 Homo sapiens |
| 4   | 0.000284    | 9606 Homo sapiens |
| 6   | 0.000426    | 9606 Homo sapiens |
| 5   | 0.000355    | 9606 Homo sapiens |
| 33  | 0.002344083 | 9606 Homo sapiens |
| 27  | 0.001917886 | 9606 Homo sapiens |
| 6   | 0.000426    | 9606 Homo sapiens |
| 117 | 0.00831084  | 9606 Homo sapiens |
| 23  | 0.001633755 | 9606 Homo sapiens |
| 4   | 0.000284    | 9606 Homo sapiens |
| 4   | 0.000284    | 9606 Homo sapiens |
| 6   | 0.000426    | 9606 Homo sapiens |
| 4   | 0.000284    | 9606 Homo sapiens |
| 6   | 0.000426    | 9606 Homo sapiens |

## E7\_severemild\_down\_reactome

|    |             |                   |
|----|-------------|-------------------|
| 9  | 0.000639    | 9606 Homo sapiens |
| 14 | 0.000994    | 9606 Homo sapiens |
| 5  | 0.000355    | 9606 Homo sapiens |
| 6  | 0.000426    | 9606 Homo sapiens |
| 4  | 0.000284    | 9606 Homo sapiens |
| 2  | 0.000142    | 9606 Homo sapiens |
| 8  | 0.000568    | 9606 Homo sapiens |
| 12 | 0.000852    | 9606 Homo sapiens |
| 14 | 0.000994    | 9606 Homo sapiens |
| 6  | 0.000426    | 9606 Homo sapiens |
| 8  | 0.000568    | 9606 Homo sapiens |
| 8  | 0.000568    | 9606 Homo sapiens |
| 13 | 0.000923    | 9606 Homo sapiens |
| 94 | 0.006677085 | 9606 Homo sapiens |
| 47 | 0.003338542 | 9606 Homo sapiens |
| 72 | 0.005114363 | 9606 Homo sapiens |
| 49 | 0.003480608 | 9606 Homo sapiens |
| 12 | 0.000852    | 9606 Homo sapiens |
| 5  | 0.000355    | 9606 Homo sapiens |
| 5  | 0.000355    | 9606 Homo sapiens |
| 6  | 0.000426    | 9606 Homo sapiens |
| 5  | 0.000355    | 9606 Homo sapiens |
| 7  | 0.000497    | 9606 Homo sapiens |
| 7  | 0.000497    | 9606 Homo sapiens |
| 11 | 0.000781    | 9606 Homo sapiens |
| 70 | 0.004972297 | 9606 Homo sapiens |
| 71 | 0.00504333  | 9606 Homo sapiens |
| 71 | 0.00504333  | 9606 Homo sapiens |
| 7  | 0.000497    | 9606 Homo sapiens |
| 2  | 0.000142    | 9606 Homo sapiens |
| 9  | 0.000639    | 9606 Homo sapiens |
| 11 | 0.000781    | 9606 Homo sapiens |
| 7  | 0.000497    | 9606 Homo sapiens |
| 12 | 0.000852    | 9606 Homo sapiens |
| 39 | 0.00277028  | 9606 Homo sapiens |
| 1  | 0.000071    | 9606 Homo sapiens |
| 1  | 0.000071    | 9606 Homo sapiens |
| 11 | 0.000781    | 9606 Homo sapiens |
| 18 | 0.001278591 | 9606 Homo sapiens |
| 18 | 0.001278591 | 9606 Homo sapiens |
| 24 | 0.001704788 | 9606 Homo sapiens |
| 29 | 0.002059952 | 9606 Homo sapiens |
| 37 | 0.002628214 | 9606 Homo sapiens |
| 3  | 0.000213    | 9606 Homo sapiens |
| 1  | 0.000071    | 9606 Homo sapiens |
| 8  | 0.000568    | 9606 Homo sapiens |
| 4  | 0.000284    | 9606 Homo sapiens |
| 10 | 0.00071     | 9606 Homo sapiens |
| 60 | 0.004261969 | 9606 Homo sapiens |
| 5  | 0.000355    | 9606 Homo sapiens |
| 47 | 0.003338542 | 9606 Homo sapiens |
| 11 | 0.000781    | 9606 Homo sapiens |
| 11 | 0.000781    | 9606 Homo sapiens |

## E7\_severemild\_down\_reactome

|    |             |                   |
|----|-------------|-------------------|
| 15 | 0.001065492 | 9606 Homo sapiens |
| 32 | 0.00227305  | 9606 Homo sapiens |
| 56 | 0.003977838 | 9606 Homo sapiens |
| 22 | 0.001562722 | 9606 Homo sapiens |
| 13 | 0.000923    | 9606 Homo sapiens |
| 17 | 0.001207558 | 9606 Homo sapiens |
| 41 | 0.002912346 | 9606 Homo sapiens |
| 5  | 0.000355    | 9606 Homo sapiens |
| 7  | 0.000497    | 9606 Homo sapiens |
| 10 | 0.00071     | 9606 Homo sapiens |
| 28 | 0.001988919 | 9606 Homo sapiens |
| 48 | 0.003409575 | 9606 Homo sapiens |
| 10 | 0.00071     | 9606 Homo sapiens |
| 24 | 0.001704788 | 9606 Homo sapiens |
| 11 | 0.000781    | 9606 Homo sapiens |
| 19 | 0.001349624 | 9606 Homo sapiens |
| 13 | 0.000923    | 9606 Homo sapiens |
| 79 | 0.005611593 | 9606 Homo sapiens |
| 11 | 0.000781    | 9606 Homo sapiens |
| 8  | 0.000568    | 9606 Homo sapiens |
| 9  | 0.000639    | 9606 Homo sapiens |
| 26 | 0.001846853 | 9606 Homo sapiens |
| 9  | 0.000639    | 9606 Homo sapiens |
| 9  | 0.000639    | 9606 Homo sapiens |
| 33 | 0.002344083 | 9606 Homo sapiens |
| 35 | 0.002486149 | 9606 Homo sapiens |
| 6  | 0.000426    | 9606 Homo sapiens |
| 20 | 0.001420656 | 9606 Homo sapiens |
| 5  | 0.000355    | 9606 Homo sapiens |
| 18 | 0.001278591 | 9606 Homo sapiens |
| 60 | 0.004261969 | 9606 Homo sapiens |
| 5  | 0.000355    | 9606 Homo sapiens |
| 4  | 0.000284    | 9606 Homo sapiens |
| 7  | 0.000497    | 9606 Homo sapiens |
| 13 | 0.000923    | 9606 Homo sapiens |
| 34 | 0.002415116 | 9606 Homo sapiens |
| 95 | 0.006748118 | 9606 Homo sapiens |
| 5  | 0.000355    | 9606 Homo sapiens |
| 3  | 0.000213    | 9606 Homo sapiens |
| 3  | 0.000213    | 9606 Homo sapiens |
| 3  | 0.000213    | 9606 Homo sapiens |
| 15 | 0.001065492 | 9606 Homo sapiens |
| 7  | 0.000497    | 9606 Homo sapiens |
| 15 | 0.001065492 | 9606 Homo sapiens |
| 12 | 0.000852    | 9606 Homo sapiens |
| 18 | 0.001278591 | 9606 Homo sapiens |
| 68 | 0.004830232 | 9606 Homo sapiens |
| 29 | 0.002059952 | 9606 Homo sapiens |
| 42 | 0.002983378 | 9606 Homo sapiens |
| 5  | 0.000355    | 9606 Homo sapiens |
| 19 | 0.001349624 | 9606 Homo sapiens |
| 86 | 0.006108822 | 9606 Homo sapiens |
| 20 | 0.001420656 | 9606 Homo sapiens |

## E7\_severemild\_down\_reactome

|     |             |                   |
|-----|-------------|-------------------|
| 55  | 0.003906805 | 9606 Homo sapiens |
| 4   | 0.000284    | 9606 Homo sapiens |
| 16  | 0.001136525 | 9606 Homo sapiens |
| 17  | 0.001207558 | 9606 Homo sapiens |
| 38  | 0.002699247 | 9606 Homo sapiens |
| 65  | 0.004617133 | 9606 Homo sapiens |
| 20  | 0.001420656 | 9606 Homo sapiens |
| 12  | 0.000852    | 9606 Homo sapiens |
| 24  | 0.001704788 | 9606 Homo sapiens |
| 14  | 0.000994    | 9606 Homo sapiens |
| 44  | 0.003125444 | 9606 Homo sapiens |
| 48  | 0.003409575 | 9606 Homo sapiens |
| 9   | 0.000639    | 9606 Homo sapiens |
| 16  | 0.001136525 | 9606 Homo sapiens |
| 14  | 0.000994    | 9606 Homo sapiens |
| 16  | 0.001136525 | 9606 Homo sapiens |
| 21  | 0.001491689 | 9606 Homo sapiens |
| 132 | 0.009376332 | 9606 Homo sapiens |
| 19  | 0.001349624 | 9606 Homo sapiens |
| 84  | 0.005966757 | 9606 Homo sapiens |
| 17  | 0.001207558 | 9606 Homo sapiens |
| 16  | 0.001136525 | 9606 Homo sapiens |
| 19  | 0.001349624 | 9606 Homo sapiens |
| 16  | 0.001136525 | 9606 Homo sapiens |
| 113 | 0.008026708 | 9606 Homo sapiens |
| 3   | 0.000213    | 9606 Homo sapiens |
| 7   | 0.000497    | 9606 Homo sapiens |
| 27  | 0.001917886 | 9606 Homo sapiens |
| 14  | 0.000994    | 9606 Homo sapiens |
| 15  | 0.001065492 | 9606 Homo sapiens |
| 17  | 0.001207558 | 9606 Homo sapiens |
| 2   | 0.000142    | 9606 Homo sapiens |
| 22  | 0.001562722 | 9606 Homo sapiens |
| 35  | 0.002486149 | 9606 Homo sapiens |
| 24  | 0.001704788 | 9606 Homo sapiens |
| 37  | 0.002628214 | 9606 Homo sapiens |
| 12  | 0.000852    | 9606 Homo sapiens |
| 14  | 0.000994    | 9606 Homo sapiens |
| 19  | 0.001349624 | 9606 Homo sapiens |
| 32  | 0.00227305  | 9606 Homo sapiens |
| 2   | 0.000142    | 9606 Homo sapiens |
| 25  | 0.00177582  | 9606 Homo sapiens |
| 32  | 0.00227305  | 9606 Homo sapiens |
| 40  | 0.002841313 | 9606 Homo sapiens |
| 61  | 0.004333002 | 9606 Homo sapiens |
| 24  | 0.001704788 | 9606 Homo sapiens |
| 28  | 0.001988919 | 9606 Homo sapiens |
| 44  | 0.003125444 | 9606 Homo sapiens |
| 6   | 0.000426    | 9606 Homo sapiens |
| 13  | 0.000923    | 9606 Homo sapiens |
| 4   | 0.000284    | 9606 Homo sapiens |
| 14  | 0.000994    | 9606 Homo sapiens |
| 34  | 0.002415116 | 9606 Homo sapiens |

## E7\_severemild\_down\_reactome

|      |             |                   |
|------|-------------|-------------------|
| 12   | 0.000852    | 9606 Homo sapiens |
| 12   | 0.000852    | 9606 Homo sapiens |
| 15   | 0.001065492 | 9606 Homo sapiens |
| 46   | 0.00326751  | 9606 Homo sapiens |
| 265  | 0.018823697 | 9606 Homo sapiens |
| 25   | 0.00177582  | 9606 Homo sapiens |
| 6    | 0.000426    | 9606 Homo sapiens |
| 15   | 0.001065492 | 9606 Homo sapiens |
| 40   | 0.002841313 | 9606 Homo sapiens |
| 34   | 0.002415116 | 9606 Homo sapiens |
| 59   | 0.004190936 | 9606 Homo sapiens |
| 28   | 0.001988919 | 9606 Homo sapiens |
| 16   | 0.001136525 | 9606 Homo sapiens |
| 101  | 0.007174315 | 9606 Homo sapiens |
| 7    | 0.000497    | 9606 Homo sapiens |
| 12   | 0.000852    | 9606 Homo sapiens |
| 259  | 0.0183975   | 9606 Homo sapiens |
| 8    | 0.000568    | 9606 Homo sapiens |
| 9    | 0.000639    | 9606 Homo sapiens |
| 29   | 0.002059952 | 9606 Homo sapiens |
| 44   | 0.003125444 | 9606 Homo sapiens |
| 39   | 0.00277028  | 9606 Homo sapiens |
| 4    | 0.000284    | 9606 Homo sapiens |
| 41   | 0.002912346 | 9606 Homo sapiens |
| 26   | 0.001846853 | 9606 Homo sapiens |
| 43   | 0.003054411 | 9606 Homo sapiens |
| 48   | 0.003409575 | 9606 Homo sapiens |
| 7    | 0.000497    | 9606 Homo sapiens |
| 7    | 0.000497    | 9606 Homo sapiens |
| 7    | 0.000497    | 9606 Homo sapiens |
| 9    | 0.000639    | 9606 Homo sapiens |
| 9    | 0.000639    | 9606 Homo sapiens |
| 29   | 0.002059952 | 9606 Homo sapiens |
| 14   | 0.000994    | 9606 Homo sapiens |
| 17   | 0.001207558 | 9606 Homo sapiens |
| 42   | 0.002983378 | 9606 Homo sapiens |
| 10   | 0.00071     | 9606 Homo sapiens |
| 9    | 0.000639    | 9606 Homo sapiens |
| 34   | 0.002415116 | 9606 Homo sapiens |
| 24   | 0.001704788 | 9606 Homo sapiens |
| 20   | 0.001420656 | 9606 Homo sapiens |
| 21   | 0.001491689 | 9606 Homo sapiens |
| 33   | 0.002344083 | 9606 Homo sapiens |
| 18   | 0.001278591 | 9606 Homo sapiens |
| 114  | 0.008097741 | 9606 Homo sapiens |
| 3    | 0.000213    | 9606 Homo sapiens |
| 37   | 0.002628214 | 9606 Homo sapiens |
| 12   | 0.000852    | 9606 Homo sapiens |
| 17   | 0.001207558 | 9606 Homo sapiens |
| 42   | 0.002983378 | 9606 Homo sapiens |
| 40   | 0.002841313 | 9606 Homo sapiens |
| 40   | 0.002841313 | 9606 Homo sapiens |
| 2518 | 0.178860634 | 9606 Homo sapiens |

## E7\_severemild\_down\_reactome

|     |             |                   |
|-----|-------------|-------------------|
| 30  | 0.002130985 | 9606 Homo sapiens |
| 12  | 0.000852    | 9606 Homo sapiens |
| 7   | 0.000497    | 9606 Homo sapiens |
| 22  | 0.001562722 | 9606 Homo sapiens |
| 54  | 0.003835772 | 9606 Homo sapiens |
| 48  | 0.003409575 | 9606 Homo sapiens |
| 5   | 0.000355    | 9606 Homo sapiens |
| 17  | 0.001207558 | 9606 Homo sapiens |
| 7   | 0.000497    | 9606 Homo sapiens |
| 63  | 0.004475067 | 9606 Homo sapiens |
| 10  | 0.00071     | 9606 Homo sapiens |
| 7   | 0.000497    | 9606 Homo sapiens |
| 74  | 0.005256428 | 9606 Homo sapiens |
| 26  | 0.001846853 | 9606 Homo sapiens |
| 212 | 0.015058957 | 9606 Homo sapiens |
| 12  | 0.000852    | 9606 Homo sapiens |
| 21  | 0.001491689 | 9606 Homo sapiens |
| 34  | 0.002415116 | 9606 Homo sapiens |
| 46  | 0.00326751  | 9606 Homo sapiens |
| 78  | 0.00554056  | 9606 Homo sapiens |
| 22  | 0.001562722 | 9606 Homo sapiens |
| 31  | 0.002202017 | 9606 Homo sapiens |
| 23  | 0.001633755 | 9606 Homo sapiens |
| 48  | 0.003409575 | 9606 Homo sapiens |
| 5   | 0.000355    | 9606 Homo sapiens |
| 53  | 0.003764739 | 9606 Homo sapiens |
| 53  | 0.003764739 | 9606 Homo sapiens |
| 17  | 0.001207558 | 9606 Homo sapiens |
| 5   | 0.000355    | 9606 Homo sapiens |
| 27  | 0.001917886 | 9606 Homo sapiens |
| 4   | 0.000284    | 9606 Homo sapiens |
| 6   | 0.000426    | 9606 Homo sapiens |
| 61  | 0.004333002 | 9606 Homo sapiens |
| 87  | 0.006179855 | 9606 Homo sapiens |
| 746 | 0.052990482 | 9606 Homo sapiens |
| 42  | 0.002983378 | 9606 Homo sapiens |
| 51  | 0.003622674 | 9606 Homo sapiens |
| 50  | 0.003551641 | 9606 Homo sapiens |
| 6   | 0.000426    | 9606 Homo sapiens |
| 66  | 0.004688166 | 9606 Homo sapiens |
| 478 | 0.033953687 | 9606 Homo sapiens |
| 28  | 0.001988919 | 9606 Homo sapiens |
| 23  | 0.001633755 | 9606 Homo sapiens |
| 12  | 0.000852    | 9606 Homo sapiens |
| 33  | 0.002344083 | 9606 Homo sapiens |
| 17  | 0.001207558 | 9606 Homo sapiens |
| 20  | 0.001420656 | 9606 Homo sapiens |
| 27  | 0.001917886 | 9606 Homo sapiens |
| 15  | 0.001065492 | 9606 Homo sapiens |
| 17  | 0.001207558 | 9606 Homo sapiens |
| 44  | 0.003125444 | 9606 Homo sapiens |
| 24  | 0.001704788 | 9606 Homo sapiens |
| 110 | 0.00781361  | 9606 Homo sapiens |

## E7\_severemild\_down\_reactome

|     |             |                   |
|-----|-------------|-------------------|
| 52  | 0.003693706 | 9606 Homo sapiens |
| 45  | 0.003196477 | 9606 Homo sapiens |
| 10  | 0.00071     | 9606 Homo sapiens |
| 189 | 0.013425202 | 9606 Homo sapiens |
| 203 | 0.014419662 | 9606 Homo sapiens |
| 103 | 0.00731638  | 9606 Homo sapiens |
| 17  | 0.001207558 | 9606 Homo sapiens |
| 15  | 0.001065492 | 9606 Homo sapiens |
| 67  | 0.004759199 | 9606 Homo sapiens |
| 108 | 0.007671544 | 9606 Homo sapiens |
| 33  | 0.002344083 | 9606 Homo sapiens |
| 51  | 0.003622674 | 9606 Homo sapiens |
| 46  | 0.00326751  | 9606 Homo sapiens |
| 34  | 0.002415116 | 9606 Homo sapiens |
| 58  | 0.004119903 | 9606 Homo sapiens |
| 15  | 0.001065492 | 9606 Homo sapiens |
| 10  | 0.00071     | 9606 Homo sapiens |
| 10  | 0.00071     | 9606 Homo sapiens |
| 46  | 0.00326751  | 9606 Homo sapiens |
| 41  | 0.002912346 | 9606 Homo sapiens |
| 4   | 0.000284    | 9606 Homo sapiens |
| 4   | 0.000284    | 9606 Homo sapiens |
| 10  | 0.00071     | 9606 Homo sapiens |
| 21  | 0.001491689 | 9606 Homo sapiens |
| 338 | 0.024009092 | 9606 Homo sapiens |
| 37  | 0.002628214 | 9606 Homo sapiens |
| 45  | 0.003196477 | 9606 Homo sapiens |
| 2   | 0.000142    | 9606 Homo sapiens |
| 19  | 0.001349624 | 9606 Homo sapiens |
| 39  | 0.00277028  | 9606 Homo sapiens |
| 319 | 0.022659469 | 9606 Homo sapiens |
| 55  | 0.003906805 | 9606 Homo sapiens |
| 88  | 0.006250888 | 9606 Homo sapiens |
| 24  | 0.001704788 | 9606 Homo sapiens |
| 6   | 0.000426    | 9606 Homo sapiens |
| 65  | 0.004617133 | 9606 Homo sapiens |
| 56  | 0.003977838 | 9606 Homo sapiens |
| 28  | 0.001988919 | 9606 Homo sapiens |
| 77  | 0.005469527 | 9606 Homo sapiens |
| 134 | 0.009518397 | 9606 Homo sapiens |
| 7   | 0.000497    | 9606 Homo sapiens |
| 20  | 0.001420656 | 9606 Homo sapiens |
| 100 | 0.007103282 | 9606 Homo sapiens |
| 142 | 0.01008666  | 9606 Homo sapiens |
| 194 | 0.013780367 | 9606 Homo sapiens |
| 38  | 0.002699247 | 9606 Homo sapiens |
| 159 | 0.011294218 | 9606 Homo sapiens |
| 1   | 0.000071    | 9606 Homo sapiens |
| 50  | 0.003551641 | 9606 Homo sapiens |
| 7   | 0.000497    | 9606 Homo sapiens |
| 8   | 0.000568    | 9606 Homo sapiens |
| 71  | 0.00504333  | 9606 Homo sapiens |
| 40  | 0.002841313 | 9606 Homo sapiens |

## E7\_severemild\_down\_reactome

|     |             |                   |
|-----|-------------|-------------------|
| 43  | 0.003054411 | 9606 Homo sapiens |
| 43  | 0.003054411 | 9606 Homo sapiens |
| 21  | 0.001491689 | 9606 Homo sapiens |
| 40  | 0.002841313 | 9606 Homo sapiens |
| 5   | 0.000355    | 9606 Homo sapiens |
| 573 | 0.040701804 | 9606 Homo sapiens |
| 99  | 0.007032249 | 9606 Homo sapiens |
| 34  | 0.002415116 | 9606 Homo sapiens |
| 14  | 0.000994    | 9606 Homo sapiens |
| 11  | 0.000781    | 9606 Homo sapiens |
| 91  | 0.006463986 | 9606 Homo sapiens |
| 35  | 0.002486149 | 9606 Homo sapiens |
| 196 | 0.013922432 | 9606 Homo sapiens |
| 27  | 0.001917886 | 9606 Homo sapiens |
| 47  | 0.003338542 | 9606 Homo sapiens |
| 8   | 0.000568    | 9606 Homo sapiens |
| 125 | 0.008879102 | 9606 Homo sapiens |
| 324 | 0.023014633 | 9606 Homo sapiens |
| 104 | 0.007387413 | 9606 Homo sapiens |
| 67  | 0.004759199 | 9606 Homo sapiens |
| 65  | 0.004617133 | 9606 Homo sapiens |
| 86  | 0.006108822 | 9606 Homo sapiens |
| 63  | 0.004475067 | 9606 Homo sapiens |
| 33  | 0.002344083 | 9606 Homo sapiens |
| 52  | 0.003693706 | 9606 Homo sapiens |
| 66  | 0.004688166 | 9606 Homo sapiens |
| 105 | 0.007458446 | 9606 Homo sapiens |
| 450 | 0.031964768 | 9606 Homo sapiens |
| 26  | 0.001846853 | 9606 Homo sapiens |
| 24  | 0.001704788 | 9606 Homo sapiens |
| 481 | 0.034166785 | 9606 Homo sapiens |
| 27  | 0.001917886 | 9606 Homo sapiens |
| 27  | 0.001917886 | 9606 Homo sapiens |
| 27  | 0.001917886 | 9606 Homo sapiens |
| 167 | 0.01186248  | 9606 Homo sapiens |
| 142 | 0.01008666  | 9606 Homo sapiens |
| 65  | 0.004617133 | 9606 Homo sapiens |
| 85  | 0.006037789 | 9606 Homo sapiens |
| 85  | 0.006037789 | 9606 Homo sapiens |
| 143 | 0.010157693 | 9606 Homo sapiens |
| 6   | 0.000426    | 9606 Homo sapiens |
| 124 | 0.008808069 | 9606 Homo sapiens |
| 210 | 0.014916892 | 9606 Homo sapiens |
| 51  | 0.003622674 | 9606 Homo sapiens |
| 76  | 0.005398494 | 9606 Homo sapiens |
| 79  | 0.005611593 | 9606 Homo sapiens |
| 36  | 0.002557181 | 9606 Homo sapiens |
| 92  | 0.006535019 | 9606 Homo sapiens |
| 58  | 0.004119903 | 9606 Homo sapiens |
| 114 | 0.008097741 | 9606 Homo sapiens |
| 19  | 0.001349624 | 9606 Homo sapiens |
| 19  | 0.001349624 | 9606 Homo sapiens |
| 88  | 0.006250888 | 9606 Homo sapiens |

## E7\_severemild\_down\_reactome

|      |             |                   |
|------|-------------|-------------------|
| 35   | 0.002486149 | 9606 Homo sapiens |
| 205  | 0.014561728 | 9606 Homo sapiens |
| 28   | 0.001988919 | 9606 Homo sapiens |
| 45   | 0.003196477 | 9606 Homo sapiens |
| 6    | 0.000426    | 9606 Homo sapiens |
| 142  | 0.01008666  | 9606 Homo sapiens |
| 8    | 0.000568    | 9606 Homo sapiens |
| 59   | 0.004190936 | 9606 Homo sapiens |
| 451  | 0.032035801 | 9606 Homo sapiens |
| 77   | 0.005469527 | 9606 Homo sapiens |
| 9    | 0.000639    | 9606 Homo sapiens |
| 298  | 0.02116778  | 9606 Homo sapiens |
| 51   | 0.003622674 | 9606 Homo sapiens |
| 50   | 0.003551641 | 9606 Homo sapiens |
| 20   | 0.001420656 | 9606 Homo sapiens |
| 78   | 0.00554056  | 9606 Homo sapiens |
| 75   | 0.005327461 | 9606 Homo sapiens |
| 80   | 0.005682625 | 9606 Homo sapiens |
| 82   | 0.005824691 | 9606 Homo sapiens |
| 53   | 0.003764739 | 9606 Homo sapiens |
| 60   | 0.004261969 | 9606 Homo sapiens |
| 241  | 0.017118909 | 9606 Homo sapiens |
| 401  | 0.02848416  | 9606 Homo sapiens |
| 32   | 0.00227305  | 9606 Homo sapiens |
| 33   | 0.002344083 | 9606 Homo sapiens |
| 285  | 0.020244353 | 9606 Homo sapiens |
| 122  | 0.008666004 | 9606 Homo sapiens |
| 221  | 0.015698253 | 9606 Homo sapiens |
| 31   | 0.002202017 | 9606 Homo sapiens |
| 352  | 0.025003552 | 9606 Homo sapiens |
| 195  | 0.013851399 | 9606 Homo sapiens |
| 220  | 0.01562722  | 9606 Homo sapiens |
| 250  | 0.017758204 | 9606 Homo sapiens |
| 157  | 0.011152152 | 9606 Homo sapiens |
| 86   | 0.006108822 | 9606 Homo sapiens |
| 884  | 0.06279301  | 9606 Homo sapiens |
| 897  | 0.063716437 | 9606 Homo sapiens |
| 339  | 0.024080125 | 9606 Homo sapiens |
| 454  | 0.032248899 | 9606 Homo sapiens |
| 219  | 0.015556187 | 9606 Homo sapiens |
| 91   | 0.006463986 | 9606 Homo sapiens |
| 945  | 0.067126012 | 9606 Homo sapiens |
| 1787 | 0.126935644 | 9606 Homo sapiens |
| 1060 | 0.075294786 | 9606 Homo sapiens |
| 252  | 0.01790027  | 9606 Homo sapiens |
| 965  | 0.068546669 | 9606 Homo sapiens |
| 187  | 0.013283137 | 9606 Homo sapiens |
| 538  | 0.038215656 | 9606 Homo sapiens |
| 811  | 0.057607615 | 9606 Homo sapiens |
| 143  | 0.010157693 | 9606 Homo sapiens |
| 2268 | 0.161102429 | 9606 Homo sapiens |

E7\_severemild\_down\_reactome

Submitted entities found

IL1RN;CXCL8;CCL3L1;IL1R2;FPR1;CXCL1;PTGS2;TNF;ICAM1;CXCL10;IL1B;CCL4;CCL3;CCL2  
IFITM3;FCN1;CDKN1A;IL1RN;CXCL8;IFITM2;TNFAIP6;NCF4;CXCL1;IFIT1;TNF;TREM1;IFIT3;FCAR;OASL;IFIT2;ICAM  
IFITM3;CDKN1A;IL1RN;CXCL8;IFITM2;CCL3L1;CEBPD;STXBP2;FPR1;IFI6;CXCL1;PTGS2;IFIT1;TNF;IFIT3;ICAM1;IFI  
IFITM3;IFITM2;RSAD2;MX1;IFI6;ISG15;IFIT1;IFIT3;IFIT2;OASL;OAS1;OAS3;IRF7;IRF8  
IFITM3;GBP5;IFITM2;RSAD2;MX1;IFI6;ISG15;IFIT1;IFIT3;ICAM1;IFIT2;OASL;HERC5;OAS1;OAS3;IRF7;IRF8;FCGR1A  
CXCL10;CXCL8;CCL3L1;CXCR1;CCRL2;CCL4;CXCR2;CCL3;CCL2;CXCL1  
CDKN1A;IL1RN;CXCL8;CEBPD;CCL3L1;IL1R2;STXBP2;OSM;FPR1;CXCL1;FOS;PTGS2;TNF;ICAM1;CXCL10;IL1B;CC  
CDKN1A;CXCL8;CEBPD;IL1B;CCL4;OSM;CCL2;FOS;PTGS2;TNF;ICAM1  
FCN1;CXCL8;TNFAIP6;C5AR1;FPR1;CXCL1;FCAR;CST3;FCGR3B;CXCR1;LAMP3;CXCR2;S100A12;PGLYRP1;CAMP  
CXCL8;CCL3L1;C5AR1;FPR1;CXCL1;CXCL10;CXCR1;CXCR2;CCRL2;CCL4;CCL3;PROK2;CCL2  
CXCL8;CCL3L1;P2RY14;C5AR1;FPR1;CXCL1;HCAR2;HCAR3;CXCL10;CXCR1;CXCR2;CCRL2;CCL4;CCL3;PROK2;C  
FCN1;CXCL8;TNFAIP6;SRC;NCF4;C5AR1;FPR1;CXCL1;TREM1;FCAR;CST3;HERC5;FCGR3B;CXCR1;LAMP3;CXCR2  
GBP5;OAS1;OAS3;IRF7;IRF8;FCGR1A;ICAM1;OASL  
FZD3;CXCL8;CCL3L1;P2RY14;C5AR1;FPR1;CXCL1;HCAR2;HCAR3;CXCL10;CXCR1;CXCR2;CCRL2;CCL4;CCL3;PRO  
CDKN1A  
CDKN1A  
IL1B  
CXCL8;SRC;CCL4L2;P2RY14;C5AR1;FPR1;CXCL1;HCAR2;HCAR3;CXCL10;CXCR1;CXCR2;CCL4  
CLN3;CDKN1A  
FZD3;CXCL8;CCL3L1;SRC;CCL4L2;P2RY14;C5AR1;FPR1;CXCL1;HCAR2;HCAR3;CXCL10;CXCR1;CXCR2;CCRL2;C  
HERC5;OAS1;OAS3;MX1;ISG15;IFIT1;OASL  
OAS1;OAS3;OASL  
EGR2;FOS;TRIB1  
CXCL8;CCL2  
CDKN1A  
CLN3;CDKN1A;MKRN3  
CXCL8;CCL2  
HCAR2;HCAR3  
CDKN1A  
CDKN1A  
EGR2;FOS;TRIB1  
IL1B  
CDKN1A;CXCL8;IL1B;FOS  
IL1RN;IL1R2;IL1B;S100A12;MAP3K8;S100P  
MAP1LC3A;SRC  
S100A9;S100A8  
EGR2;SRC;FOS;TRIB1  
NCF4;S100A9;S100A8  
CXCL8;SRC;CCL4L2;P2RY14;C5AR1;FPR1;CXCL1;HCAR2;HCAR3;CXCL10;CXCR1;CXCR2;CCL4;PROK2;FFAR2;AR  
CLN3;CDKN1A  
CLN3;CDKN1A  
LST1  
CLN3;CDKN1A  
CLN3;CDKN1A  
CLN3;CDKN1A  
EGR2;SRC;FOS;TRIB1  
TNFRSF10C  
TYROBP;SRC  
SEMA4A;TYROBP  
SERPING1  
SLC22A4  
CDKN1A

E7\_severemild\_down\_reactome

HERC5;MX1;ISG15;IFIT1  
CLN3;CDKN1A;CXCL8;IL1B;FOS  
FCER1G;CLEC4D;SRC;IL1B;CLEC4E  
LYZ;PGLYRP1;S100A9;S100A8;CAMP  
CLN3;CDKN1A;SRC  
CLN3;CDKN1A;SRC  
IRF7;S100A12;MAP3K8;S100P;FOS;S100A9;S100A8  
ENTPD1;IL1B  
ENTPD1;IL1B  
FPR1  
S100A9;S100A8  
S100A12;MAP3K8;S100P;FOS;S100A9;S100A8  
S100A12;MAP3K8;S100P;FOS;S100A9;S100A8  
S100A9;S100A8  
BCL2A1  
S100A12;MAP3K8;S100P;FOS;S100A9;S100A8  
S100A12;MAP3K8;S100P;FOS;S100A9;S100A8  
FOS  
IL1RN;IL1R2;IL1B;S100A12;MAP3K8;S100P  
CDKN1A  
TNF  
CLN3  
SRC  
MAP1LC3A;SRC  
CLEC4D;FCER1G;CLEC4E  
HERC5;IRF7;S100A12;S100P;ISG15  
ARG2;ARG1  
CDKN1A  
GK  
FPR1  
CEACAM1  
IRF7  
IL1B  
EGR2;CEBPD;TNF  
CDKN1A;MKRN3  
CLN3;CDKN1A  
CDKN1A;SPI1  
CLN3;CDKN1A  
SLC22A4  
S100A9;S100A8  
CLN3  
APOBEC3A  
IRF7;S100A12;MAP3K8;S100P;FOS;S100A9;S100A8  
HERC5;ISG15  
BST1;FCGR3B;PLAUR;LY6E  
IRF7;S100A12;MAP3K8;S100P;FOS  
CLN3;CDKN1A  
IRF7;S100A12;MAP3K8;S100P;FOS  
IRF7;S100A12;MAP3K8;S100P;FOS  
SRC  
EGR2  
SLC15A3  
FPR1

SRC;IL1B  
IRF7;S100A12;MAP3K8;S100P;FOS  
IRF7;S100A12;MAP3K8;S100P;FOS  
IRF7;S100A12;MAP3K8;S100P;FOS  
SRC;MAP3K8  
FOS  
PLAUR  
SRC  
APOBEC3A  
SRC  
S100A9;S100A8  
S100A9;S100A8  
CDKN1A  
EPM2A  
CHRNA6  
FPR1  
SRC  
SRC  
FPR1  
FOS  
FCN1  
SRC  
APOBEC3A  
SRC  
CST3;LYZ;HSPG2  
SLC22A4  
CHRNA6  
NCF4  
DSE  
CSTA;KRT17;JUP;KRT23  
IRF7  
SRC  
CLN3  
TNF  
PLAUR  
MKRN3  
SRC  
SETD1A  
CXCL8;PLEK;STXBP2;SERPING1  
CDKN1A  
CHRNA6  
FCN1  
MKRN3  
TYROBP;TREM1  
SRC  
CLEC4E;FCGR1A  
FCER1G;CXCL8;SRC;PLEK;STXBP2;SERPING1  
NCF4;CLEC4E;FCGR1A;S100A9;S100A8  
HSPG2  
HSPG2  
FCER1G  
S100A12;S100P  
FAR2

CDKN1A  
CXCL8;PLEK;STXBP2;SERPING1  
IRF7  
CHRNA6  
CHRNA6  
CDKN1A  
CA14  
TNFSF13B  
OSM  
FCGR2A;SRC;FCGR1A  
MAP3K8  
SRC  
P2RY14  
CXCL8;CCL2  
FOS  
FCN1;C5AR1;SERPING1  
SRC  
SRC  
SRC  
MKRN3  
FPR1  
MKRN3  
MKRN3  
MSRB1  
SRC  
S100A12;MAP3K8;S100P;FOS  
S100A12;MAP3K8;S100P;FOS  
S100A12;MAP3K8;S100P;FOS  
CLN3;CDKN1A  
SRC  
IRF7  
IRF7  
MARCKS  
LST1  
SRC;FOS  
HSPG2  
HSPG2  
MKRN3  
SERPING1  
SERPING1  
GK  
BCL2A1  
BCL2A1  
SRC  
HSPG2  
MAP1LC3A  
PTGS2  
EPM2A  
S100A12;MAP3K8;S100P;FOS  
RAB31;RAB20  
CDKN1A;SRC  
SRC  
SRC

E7\_severemild\_down\_reactome

P2RY14  
MAP3K8;FOS  
SGO1;CLN3;CDKN1A;MKRN3  
EPM2A  
PCOLCE  
STXBP2  
SEMA4A;TYROBP  
SRC  
PSPH  
FAR2  
DSE;HSPG2  
IL1B  
SRC  
SERPING1  
HSPG2  
SRC  
SRC  
JUP;SRC;NCF4  
SRC  
FPR1  
LST1  
SRC  
MAP3K8  
SLC22A4  
SETD1A  
MAP3K8;FOS  
JUP;ARHGEF40  
PTGS2  
FFAR2  
CDKN1A  
TYROBP;JUP;SRC  
TNF  
S100A12;S100P  
SRC  
TNFSF13B  
OSM  
ENTPD1;FCGR2A;SRC;IL1B;FCGR1A  
HSPG2  
KCNJ15  
KCNJ15  
KCNJ15  
PIWIL4  
SRC  
HSPG2  
SRC  
PTGS2  
TNFRSF10C  
BST1;PTGS2  
C5AR1;SERPING1  
SRC  
SRC  
JUP;SRC;NCF4  
FCGR2A;SRC;FCGR1A

HSPG2;ICAM1  
SRC  
SLC29A2  
PTGS2  
SRC  
CEACAM1;FCER1G;SRC;TREM1  
CLN3;CDKN1A  
ENTPD1  
SRC  
SRC  
LILRA6;IFITM3;TYROBP;FCGR1A;TREM1;ICAM1  
MAP1LC3A;SRC  
ISG15  
FOS  
SRC  
JUP  
PTGS2  
SPI1;SRC;SETD1A  
CLN3;CDKN1A  
CDKN1A;SRC  
TYROBP  
SRC  
MKRN3  
SRC  
SGO1;SRC;NCF4;MKRN3;S100A9;S100A8  
JUP  
KCNJ15  
CLN3  
HSPG2  
SRC  
LST1  
CLN3  
LST1  
SRC;MAP3K8  
FZD3  
EPM2A  
SRC  
SRC  
SRC  
SRC  
EPSTI1  
FCER1G  
SRC  
SRC  
SERPING1  
SRC  
CLN3  
TNF;TNFSF13B  
SRC  
IRF7  
SRC  
HSPG2  
CSTA;KRT17;JUP;KRT23

E7\_severemild\_down\_reactome

SRC  
GMPR  
SPI1  
NQO1  
IFITM3;LILRA6;LAG3;SRC;NCF4;FPR1;TREM1;ICAM1;HERC5;TYROBP;MAP3K8;CLEC4E;FCGR1A;S100A9;CD101;S  
TNF  
ISG15  
JUP  
LST1;SLC29A2  
SRC  
LGALS9  
ISG15  
KYNU  
CLN3;CDKN1A;SRC  
SRC  
SRC  
CLN3;CDKN1A;TNFRSF10C;MKRN3;FOS  
KCNJ15  
KCNJ15  
FPR1  
FPR1  
SRC  
NQO1  
SRC  
SRC  
SRC  
FPR1;MKRN3  
SRC  
SRC  
SRC  
SRC  
SRC  
HSPG2  
SRC  
S100A12;S100P  
TNF  
SRC  
SRC  
ISG15  
SRC  
FCER1G;FOS  
CDKN1A;SRC  
PTGS2  
SLC29A2  
SRC;FOS;USF1  
JUP  
SRC  
PTGS2  
CD101  
FCGR2A;SRC;FCGR1A  
FCGR2A;SRC;FCGR1A  
FCGR2A;SRC;FCGR1A  
CDKN1A;CXCL8;CCL3L1;SRC;CCL4L2;NCF4;C5AR1;FPR1;CXCL1;RASAL1;TNF;HCAR2;CLN3;HCAR3;CXCR1;CCRL

E7\_severemild\_down\_reactome

FPR1  
FCGR2A;FCGR1A  
SRC  
HSPG2  
SRC;CD24  
SRC  
JUP  
PLN  
ARHGEF40  
MKRN3  
SRC  
FZD3  
HSPG2  
PCOLCE  
SGO1;CLN3;JUP;SRC;NCF4;EPSTI1;MKRN3;ARHGEF40;S100A9;S100A8  
KCNJ15  
JUP  
NCF4  
SRC  
NQO1  
GMPR  
SRC  
SRC  
HERC5;NCF4;CLEC4E;FCGR1A;S100A9;S100A8;HERC6  
RASAL1  
CLN3  
CLN3  
PLN  
SRC  
SGO1;SRC  
CLN3  
JUP  
CLN3;CDKN1A  
MAP1LC3A;SRC  
EGR2;JUP;SRC;NCF4;FOS;TRIB1  
LST1  
PCOLCE  
IRF7  
JUP;ARHGEF40  
FOS;USF1  
CDKN1A;BCL2A1;SRC;FPR1  
HSPG2  
HSPG2  
MKRN3  
SGPP2  
NQO1  
MKRN3  
FZD3  
MKRN3  
ARHGEF40  
EPM2A  
FCGR2A;FCGR1A  
SRC;CHRNA6;KCNJ15

SRC  
NCF4  
CDKN1A  
IL1B;MKRN3  
SGO1;JUP;SRC;NCF4;EPST11;MKRN3;ARHGEF40;S100A9;S100A8  
ARHGEF40;TNF  
FOS  
ARHGEF40  
SLC22A4  
MAP1LC3A;SRC  
HSPG2  
SRC  
SRC  
HSPG2  
PTGS2  
FPR1  
NCF4  
S100A9;S100A8  
SRC  
G0S2  
SGO1  
SGO1  
CLN3  
RAB31  
CEACAM1;FCER1G;CXCL8;SRC;PLEK;STXBP2;PLAUR;SERPING1;TREM1  
JUP  
G0S2  
SRC  
CLN3  
SRC  
CEACAM1;PCOLCE;HSPG2;ICAM1  
CLN3;CDKN1A  
DSE;HSPG2  
FZD3  
NCF4  
SLC22A4;LST1  
SRC  
CLN3  
PCOLCE  
NQO1;NCF4  
FCER1G  
KCNJ15  
FPR1  
SRC  
SLC22A4;LST1;SLC15A3;SLC29A2  
MARCKS  
FPR1;MKRN3  
CST3  
ARHGEF40  
SGO1  
FCN1  
SRC  
FOS

E7\_severemild\_down\_reactome

EGR2  
EGR2  
FCN1  
PIWIL4  
SGO1  
SEMA4A;EGR2;CSTA;CDKN1A;SPI1;CEBPD;JUP;SRC;KRT23;TNF;TYROBP;KRT17;CD24  
LST1  
MKRN3  
CST3  
FCER1G  
JUP;SRC;NCF4;EPSTI1;ARHGEF40  
RAB31  
SRC;FOS;USF1  
CLN3  
IRF7;ISG15  
SGO1  
FPR1  
SEMA4A;EGR2;TYROBP;SRC;CD24  
LST1;SLC29A2  
IRF7;MKRN3;ISG15  
FCER1G;FOS  
CDKN1A;SRC  
ENTPD1  
PLN  
CD101  
MARCKS  
HSPG2  
NQO1;CLN3;CDKN1A;CXCL8;IL1B;NCF4;CCL2;FOS  
LAG3  
MKRN3  
NQO1;CLN3;CDKN1A;CXCL8;IL1B;NCF4;CCL2;FOS  
SRC  
SRC  
SRC  
SRC;CHRNA6;KCNJ15  
ENTPD1;GMPR  
SGPP2  
SETD1A  
SETD1A  
BST1;PTGS2  
JUP  
PTGS2  
IRF7;MKRN3;ISG15;HSPG2  
FZD3  
SLC15A3  
PTGS2  
FPR1  
HSPG2  
CLN3  
CDKN1A;SRC  
CEBPD  
FCER1G  
SLC22A4;LST1

E7\_severemild\_down\_reactome

PROK2;FFAR2  
BST1;PTGS2;HSPG2  
SRC  
FPR1  
NCF4  
MKRN3  
SGO1  
ISG15  
SGO1;CLN3;CDKN1A;SRC;MKRN3  
HSPG2  
HERC5;HERC6  
SEMA4A;TYROBP;SRC;CD24  
PLN  
ATAT1  
SGO1  
CDKN1A  
SRC;RASAL1  
CDKN1A  
SRC;RASAL1  
PLN  
SRC  
EPM2A;DSE;HSPG2  
FPR1;IRF7;MKRN3;ISG15;HSPG2  
SGO1  
SGO1  
NQO1;ARG2;ARG1;KYNU;PSPH  
SRC;RASAL1  
SRC;CHRNA6;KCNJ15  
CEBPD  
SGO1;CLN3;CDKN1A;SRC  
EPM2A;HSPG2  
SLC22A4;PTGS2  
LST1  
FZD3  
ATAT1  
CLN3;CDKN1A;SPI1;SRC;SETD1A;TNFRSF10C;MKRN3;FOS  
ENTPD1;FCGR2A;CEBPD;SRC;IL1B;FPR1;IRF7;MKRN3;ISG15;FCGR1A;HSPG2  
ISG15  
SLC22A4;PLN;LST1;SLC15A3;SLC29A2  
RAB31;SRC;MKRN3  
SGO1  
CLN3;CDKN1A;SPI1;SRC;SETD1A;TNFRSF10C;MKRN3;FOS  
SLC22A4;EPM2A;CDKN1A;ENTPD1;BCL2A1;CEBPD;SRC;LST1;FPR1;ISG15;HSPG2;CLN3;FCGR2A;IL1B;IRF7;MKRN3  
CLN3;CDKN1A;PIWIL4;SPI1;SRC;SETD1A;TNFRSF10C;MKRN3;FOS  
RAB31;SRC;MKRN3  
SLC22A4;GK;LST1;G0S2;FAR2;PTGS2;SGPP2  
APOBEC3A  
CST3;BST1;FCGR3B;RAB31;RAB20;PLAUR;LY6E  
CST3;BST1;CLN3;FCGR3B;RAB31;RAB20;PLAUR;LYZ;HSPG2;LY6E;MSRB1  
HSPG2  
SLC22A4;EPM2A;NQO1;ARG2;ENTPD1;GK;ARG1;LST1;G0S2;GMMP;PTGS2;SGPP2;HSPG2;BST1;MARCKS;KYNU;D

E7\_severemild\_down\_reactome

Mapped entities

S100A8;LILRA6

E7\_severemild\_down\_reactome

Found reaction identifiers

R-HSA-8937656;R-HSA-6784160;R-HSA-6790029;R-HSA-8937654  
R-HSA-936462;R-HSA-8983688;R-HSA-177671;R-HSA-8983680;R-HSA-202248;R-HSA-1222685;R-HSA-8863895;R-HSA-936462;R-HSA-6785895;R-HSA-8983688;R-HSA-446862;R-HSA-6789615;R-HSA-8983680;R-HSA-1169307;R-HSA-1015702;R-HSA-1015699  
R-HSA-936462;R-HSA-8983688;R-HSA-8985153;R-HSA-8983680;R-HSA-1169307;R-HSA-8985091;R-HSA-8985157;R-HSA-373813;R-HSA-443986;R-HSA-373074;R-HSA-373791;R-HSA-443978;R-HSA-374248;R-HSA-3296301  
R-HSA-507719;R-HSA-6785895;R-HSA-6783524;R-HSA-6784160;R-HSA-451649;R-HSA-446862;R-HSA-6789615;R-HSA-6785895;R-HSA-6790022;R-HSA-6789524;R-HSA-6790036;R-HSA-6789615;R-HSA-6790029;R-HSA-6789325;R-HSA-6798743;R-HSA-6799350;R-HSA-6798739;R-HSA-6800434;R-HSA-6798751;R-HSA-6798749;R-HSA-6798748;R-HSA-373813;R-HSA-443986;R-HSA-964811;R-HSA-444691;R-HSA-375395;R-HSA-373074;R-HSA-444527;R-HSA-373813;R-HSA-417858;R-HSA-964811;R-HSA-375395;R-HSA-3296309;R-HSA-444527;R-HSA-443978;R-HSA-444171;R-HSA-373813;R-HSA-975118;R-HSA-936462;R-HSA-9604499;R-HSA-177671;R-HSA-2395439;R-HSA-975106;R-HSA-1222685;R-HSA-1031716;R-HSA-1031713  
R-HSA-417858;R-HSA-964811;R-HSA-375395;R-HSA-3296309;R-HSA-444527;R-HSA-443978;R-HSA-444171;R-HSA-373813;R-HSA-6803411;R-HSA-6803388;R-HSA-6803403;R-HSA-6803801  
R-HSA-6803411;R-HSA-6803388;R-HSA-6803403;R-HSA-6803801  
R-HSA-5660663;R-HSA-5660622  
R-HSA-8964329;R-HSA-749454;R-HSA-8964242;R-HSA-749456;R-HSA-380073;R-HSA-8964311  
R-HSA-6803411;R-HSA-69562;R-HSA-6803388;R-HSA-187934;R-HSA-6803403;R-HSA-6803801  
R-HSA-749448;R-HSA-417858;R-HSA-749454;R-HSA-964811;R-HSA-749452;R-HSA-3296309;R-HSA-443978;R-HSA-1678841;R-HSA-936462;R-HSA-8983688;R-HSA-1169395;R-HSA-1678843;R-HSA-1169394;R-HSA-1678842;R-HSA-8983688;R-HSA-8985153;R-HSA-8983680;R-HSA-8985091;R-HSA-8985157;R-HSA-8983671  
R-HSA-9031624;R-HSA-9612534;R-HSA-9613210;R-HSA-9031616;R-HSA-9613213;R-HSA-9612483;R-HSA-9613219;R-HSA-517731;R-HSA-1791056  
R-HSA-8865280;R-HSA-8865244;R-HSA-8865256  
R-HSA-6803892;R-HSA-6803411;R-HSA-6803875;R-HSA-6803890;R-HSA-6803871;R-HSA-69562;R-HSA-6803388;R-HSA-517731;R-HSA-1791056  
R-HSA-444661;R-HSA-3296309  
R-HSA-8878130;R-HSA-8878178;R-HSA-8878186  
R-HSA-9617840;R-HSA-6803411;R-HSA-9618004;R-HSA-6803403;R-HSA-9617838  
R-HSA-9031624;R-HSA-9612534;R-HSA-9613210;R-HSA-9031616;R-HSA-9613213;R-HSA-9612483;R-HSA-9613219;R-HSA-449058;R-HSA-448703  
R-HSA-3790137;R-HSA-3788745;R-HSA-4568740;R-HSA-4568737;R-HSA-3797196;R-HSA-3857308;R-HSA-3788705;R-HSA-507719;R-HSA-446694;R-HSA-446692;R-HSA-168166;R-HSA-5684275;R-HSA-451649;R-HSA-5684273;R-HSA-8948143;R-HSA-8959571;R-HSA-8959573  
R-HSA-6798528;R-HSA-6798474  
R-HSA-9031624;R-HSA-171011;R-HSA-9612534;R-HSA-9603445;R-HSA-9613210;R-HSA-9031616;R-HSA-9603419;R-HSA-9626848;R-HSA-9626832;R-HSA-9626880;R-HSA-9626816;R-HSA-5668629;R-HSA-9626817;R-HSA-5218827;R-HSA-8964329;R-HSA-749448;R-HSA-749454;R-HSA-749452;R-HSA-380073;R-HSA-379048;R-HSA-8964252;R-HSA-6803411;R-HSA-69562;R-HSA-6803388;R-HSA-187934;R-HSA-6803403;R-HSA-6803801  
R-HSA-6803411;R-HSA-69562;R-HSA-6803388;R-HSA-187934;R-HSA-6803403;R-HSA-6803801  
R-HSA-5661184  
R-HSA-9659782  
R-HSA-9659782  
R-HSA-6803411;R-HSA-69562;R-HSA-6803388;R-HSA-187934;R-HSA-6803403;R-HSA-6803801  
R-HSA-9031624;R-HSA-171011;R-HSA-9612534;R-HSA-9613210;R-HSA-9031616;R-HSA-170991;R-HSA-9613213;R-HSA-5633414;R-HSA-5633441  
R-HSA-210274;R-HSA-391156  
R-HSA-416725;R-HSA-416690  
R-HSA-9651456;R-HSA-9651467;R-HSA-9650447  
R-HSA-5625674  
R-HSA-9698043;R-HSA-9698041

E7\_severemild\_down\_reactome

R-HSA-1678841;R-HSA-936462;R-HSA-1169395;R-HSA-1678843;R-HSA-1169394;R-HSA-1678842;R-HSA-1169397;R-HSA-3790137;R-HSA-4568740;R-HSA-3222546;R-HSA-4568737;R-HSA-3857308;R-HSA-3797202;R-HSA-3786258;R-HSA-5660663;R-HSA-5621366;R-HSA-5621363;R-HSA-5621371;R-HSA-5621370;R-HSA-5607750;R-HSA-5621347;R-HSA-6801687;R-HSA-6789072;R-HSA-6798528;R-HSA-8862320;R-HSA-8862300;R-HSA-6798474;R-HSA-1222685;R-HSA-8941915;R-HSA-8942607;R-HSA-9018017;R-HSA-69227;R-HSA-8942803;R-HSA-1226094;R-HSA-8942836;R-HSA-8941915;R-HSA-8942607;R-HSA-9018017;R-HSA-69227;R-HSA-8942803;R-HSA-1226094;R-HSA-8942836;R-HSA-166082;R-HSA-177671;R-HSA-2201316;R-HSA-451649;R-HSA-166091;R-HSA-2201322;R-HSA-5684250;R-HSA-449058;R-HSA-448703;R-HSA-8850846;R-HSA-449058;R-HSA-448703;R-HSA-8850846;R-HSA-3656382;R-HSA-5602383;R-HSA-5602606;R-HSA-166082;R-HSA-2201316;R-HSA-451649;R-HSA-166091;R-HSA-2201322;R-HSA-5684250;R-HSA-166286;R-HSA-166082;R-HSA-2201316;R-HSA-451649;R-HSA-166091;R-HSA-2201322;R-HSA-5684250;R-HSA-166286;R-HSA-5602353;R-HSA-5602672;R-HSA-9725338;R-HSA-166082;R-HSA-2201316;R-HSA-451649;R-HSA-166091;R-HSA-2201322;R-HSA-5684250;R-HSA-166286;R-HSA-166082;R-HSA-2201316;R-HSA-451649;R-HSA-166091;R-HSA-2201322;R-HSA-5684250;R-HSA-166286;R-HSA-9625479;R-HSA-9625465;R-HSA-507719;R-HSA-451649;R-HSA-446862;R-HSA-5684250;R-HSA-5684248;R-HSA-446868;R-HSA-450133;R-HSA-9698043;R-HSA-9698041;R-HSA-5626981;R-HSA-5626982;R-HSA-5626988;R-HSA-188390;R-HSA-191654;R-HSA-191636;R-HSA-191656;R-HSA-5205663;R-HSA-8948143;R-HSA-8959571;R-HSA-8959573;R-HSA-5205649;R-HSA-5621366;R-HSA-5621347;R-HSA-5621363;R-HSA-5621356;R-HSA-5621353;R-HSA-5621352;R-HSA-5621355;R-HSA-936462;R-HSA-9604499;R-HSA-168166;R-HSA-168935;R-HSA-933538;R-HSA-933536;R-HSA-933533;R-HSA-452036;R-HSA-70569;R-HSA-9698043;R-HSA-9698041;R-HSA-75887;R-HSA-3656382;R-HSA-202723;R-HSA-9604487;R-HSA-449058;R-HSA-560491;R-HSA-381377;R-HSA-381283;R-HSA-977271;R-HSA-381337;R-HSA-977392;R-HSA-9614562;R-HSA-9617840;R-HSA-6803411;R-HSA-9618004;R-HSA-6803403;R-HSA-9617838;R-HSA-69562;R-HSA-4647613;R-HSA-3786258;R-HSA-187934;R-HSA-4647594;R-HSA-4647593;R-HSA-9616243;R-HSA-9634433;R-HSA-9616214;R-HSA-9617207;R-HSA-8865505;R-HSA-9617064;R-HSA-9624668;R-HSA-9659782;R-HSA-549241;R-HSA-549297;R-HSA-5432849;R-HSA-8848436;R-HSA-8848414;R-HSA-77609;R-HSA-975118;R-HSA-166082;R-HSA-5432849;R-HSA-177671;R-HSA-2201316;R-HSA-451649;R-HSA-166091;R-HSA-936462;R-HSA-936563;R-HSA-162836;R-HSA-162729;R-HSA-8940388;R-HSA-168166;R-HSA-177671;R-HSA-5684275;R-HSA-168933;R-HSA-451649;R-HSA-5684273;R-HSA-5684250;R-HSA-9659782;R-HSA-975118;R-HSA-168166;R-HSA-5684275;R-HSA-451649;R-HSA-5684273;R-HSA-975106;R-HSA-5684250;R-HSA-975118;R-HSA-168166;R-HSA-5684275;R-HSA-451649;R-HSA-5684273;R-HSA-975106;R-HSA-5684250;R-HSA-354149;R-HSA-443910;R-HSA-429415;R-HSA-354087;R-HSA-372705;R-HSA-432096;R-HSA-429441;R-HSA-449058;R-HSA-9619667;R-HSA-9615638;R-HSA-9621399;R-HSA-9616116;R-HSA-9614773;R-HSA-9614778;R-HSA-9621400;R-HSA-428007;R-HSA-3656382

E7\_severemild\_down\_reactome

R-HSA-5660663;R-HSA-5607750;R-HSA-5660622  
R-HSA-168166;R-HSA-177671;R-HSA-5684275;R-HSA-166245;R-HSA-168933;R-HSA-451649;R-HSA-5684273;R-HSA-  
R-HSA-168166;R-HSA-177671;R-HSA-5684275;R-HSA-166245;R-HSA-168933;R-HSA-451649;R-HSA-5684273;R-HSA-  
R-HSA-975118;R-HSA-168166;R-HSA-5684275;R-HSA-451649;R-HSA-5684273;R-HSA-975106;R-HSA-5684250;R-HSA-  
R-HSA-392530;R-HSA-389756;R-HSA-388831  
R-HSA-9768950;R-HSA-9768945  
R-HSA-162836;R-HSA-162729  
R-HSA-9603445;R-HSA-9603419;R-HSA-9603420;R-HSA-9603437  
R-HSA-77609;R-HSA-83677  
R-HSA-418859  
R-HSA-5602353;R-HSA-5602672;R-HSA-5602383;R-HSA-5602606  
R-HSA-5602353;R-HSA-5602672;R-HSA-5602383;R-HSA-5602606  
R-HSA-9698043;R-HSA-9698041  
R-HSA-3797226;R-HSA-3791349  
R-HSA-629599;R-HSA-622326  
R-HSA-444527  
R-HSA-9612219  
R-HSA-9037040  
R-HSA-2025882;R-HSA-9690461  
R-HSA-450292;R-HSA-450325  
R-HSA-2855125  
R-HSA-443439;R-HSA-443418  
R-HSA-77609;R-HSA-83677  
R-HSA-9011241  
R-HSA-976734;R-HSA-977136  
R-HSA-549241;R-HSA-549297  
R-HSA-629595;R-HSA-629596  
R-HSA-1236967  
R-HSA-2022052  
R-HSA-6814695;R-HSA-6810357;R-HSA-6811539;R-HSA-6814387;R-HSA-8942224;R-HSA-6814734;R-HSA-6814764;R-HSA-  
R-HSA-9013979;R-HSA-9013978;R-HSA-177671;R-HSA-168933  
R-HSA-8876948;R-HSA-112333  
R-HSA-9706390  
R-HSA-83582  
R-HSA-158982;R-HSA-159001;R-HSA-158942;R-HSA-158959;R-HSA-159005;R-HSA-158925  
R-HSA-9614562  
R-HSA-210291  
R-HSA-5637686;R-HSA-5159245;R-HSA-5244692;R-HSA-4827382  
R-HSA-482772;R-HSA-481007  
R-HSA-8865280;R-HSA-8865244;R-HSA-8865256  
R-HSA-629599;R-HSA-622326  
R-HSA-166726;R-HSA-2855125  
R-HSA-75016  
R-HSA-2424484;R-HSA-2424486;R-HSA-2424487;R-HSA-2424480;R-HSA-210309;R-HSA-2424482;R-HSA-2130151;R-HSA-  
R-HSA-354149;R-HSA-443910;R-HSA-429415;R-HSA-354087;R-HSA-372705;R-HSA-432096;R-HSA-429441;R-HSA-4  
R-HSA-1236939;R-HSA-1236955;R-HSA-1236940;R-HSA-1236941  
R-HSA-139842;R-HSA-443910;R-HSA-418176;R-HSA-429441;R-HSA-443905;R-HSA-354124;R-HSA-372693;R-HSA-4  
R-HSA-8863895;R-HSA-1236967;R-HSA-1236939;R-HSA-1236955;R-HSA-1236940;R-HSA-1236941  
R-HSA-9036289;R-HSA-3656254;R-HSA-9036290;R-HSA-3656267  
R-HSA-9036283;R-HSA-3656261;R-HSA-9036285;R-HSA-3656257  
R-HSA-114577;R-HSA-432295;R-HSA-210282  
R-HSA-879411;R-HSA-879362  
R-HSA-390438

E7\_severemild\_down\_reactome

R-HSA-198613  
R-HSA-482772;R-HSA-481007  
R-HSA-975118;R-HSA-933533;R-HSA-933531;R-HSA-975188;R-HSA-975106  
R-HSA-629595;R-HSA-629596;R-HSA-629599;R-HSA-622326  
R-HSA-629595;R-HSA-629596  
R-HSA-4647594  
R-HSA-1475025;R-HSA-1475017  
R-HSA-5676599;R-HSA-5676596  
R-HSA-6783524;R-HSA-6783552  
R-HSA-2029455;R-HSA-2029452;R-HSA-2029449;R-HSA-1861621;R-HSA-2029459  
R-HSA-5684261;R-HSA-451634;R-HSA-5684275;R-HSA-451649;R-HSA-5684273;R-HSA-5684250;R-HSA-5684267;R-HSA-5684268  
R-HSA-205319;R-HSA-1433506;R-HSA-205244  
R-HSA-417858  
R-HSA-517731;R-HSA-1791056  
R-HSA-9768950;R-HSA-9768945  
R-HSA-9021306;R-HSA-166753;R-HSA-166726;R-HSA-964811;R-HSA-8852481;R-HSA-375395;R-HSA-166792;R-HSA-166793  
R-HSA-177923;R-HSA-177937  
R-HSA-373716;R-HSA-418868;R-HSA-418850;R-HSA-418865;R-HSA-374701;R-HSA-418874;R-HSA-418858;R-HSA-418859  
R-HSA-171011;R-HSA-170991  
R-HSA-139906;R-HSA-139899  
R-HSA-2134519;R-HSA-2134506  
R-HSA-9729500  
R-HSA-9727919  
R-HSA-5676917  
R-HSA-1295609  
R-HSA-450292;R-HSA-5684261;R-HSA-450325;R-HSA-451634;R-HSA-168166;R-HSA-5684275;R-HSA-451649;R-HSA-451650  
R-HSA-450292;R-HSA-5684261;R-HSA-450325;R-HSA-451634;R-HSA-168166;R-HSA-5684275;R-HSA-451649;R-HSA-451650  
R-HSA-450292;R-HSA-5684261;R-HSA-450325;R-HSA-451634;R-HSA-168166;R-HSA-5684275;R-HSA-451649;R-HSA-451650  
R-HSA-187552;R-HSA-187520;R-HSA-8848436;R-HSA-187574;R-HSA-187575;R-HSA-8848414  
R-HSA-354165;R-HSA-354087  
R-HSA-177671;R-HSA-166245;R-HSA-168933;R-HSA-166271  
R-HSA-918232;R-HSA-1028821;R-HSA-918229;R-HSA-1028816  
R-HSA-399978  
R-HSA-9757010  
R-HSA-9021609;R-HSA-9021660;R-HSA-9021596;R-HSA-9625479;R-HSA-9625465;R-HSA-9632412  
R-HSA-3560804  
R-HSA-4420365  
R-HSA-6803892;R-HSA-6803875;R-HSA-6803890;R-HSA-6803871  
R-HSA-9651456;R-HSA-9651467;R-HSA-9650447  
R-HSA-9651456;R-HSA-9651467;R-HSA-9650447  
R-HSA-75887  
R-HSA-9725338  
R-HSA-9725338  
R-HSA-372693;R-HSA-372705;R-HSA-372697  
R-HSA-3560802  
R-HSA-5205663;R-HSA-5205649  
R-HSA-2161951  
R-HSA-3797226;R-HSA-3791349  
R-HSA-450292;R-HSA-5684261;R-HSA-450325;R-HSA-451634;R-HSA-168166;R-HSA-5684275;R-HSA-451649;R-HSA-451650  
R-HSA-8870469;R-HSA-8870466  
R-HSA-8878130;R-HSA-8878178;R-HSA-8937807;R-HSA-8937792;R-HSA-8878186;R-HSA-8937814  
R-HSA-3928633;R-HSA-3928639;R-HSA-3928594;R-HSA-3928625;R-HSA-3928641;R-HSA-3928640;R-HSA-3928631;R-HSA-3928632  
R-HSA-177923

E7\_severemild\_down\_reactome

R-HSA-417858  
R-HSA-450292;R-HSA-5684261;R-HSA-450325;R-HSA-451634;R-HSA-5684275;R-HSA-451649;R-HSA-5684273;R-HSA-141409;R-HSA-6803411;R-HSA-141431;R-HSA-75016;R-HSA-69562;R-HSA-6803388;R-HSA-187934;R-HSA-141409;R-HSA-3781001;R-HSA-3781018;R-HSA-3781021;R-HSA-3781009;R-HSA-3780995;R-HSA-3781011  
R-HSA-2022141  
R-HSA-449117  
R-HSA-416725;R-HSA-416690  
R-HSA-388833;R-HSA-388829  
R-HSA-977324  
R-HSA-390438  
R-HSA-1889981;R-HSA-9638064;R-HSA-1889978;R-HSA-2022052;R-HSA-1878002;R-HSA-1889955  
R-HSA-449058  
R-HSA-171011;R-HSA-170991  
R-HSA-158357;R-HSA-9650473;R-HSA-158399  
R-HSA-9694579;R-HSA-9694661;R-HSA-9699007;R-HSA-9697423;R-HSA-9698988  
R-HSA-9603445;R-HSA-9603419;R-HSA-9603420;R-HSA-9603437  
R-HSA-8876948;R-HSA-112333  
R-HSA-5218830;R-HSA-5218828;R-HSA-5218827;R-HSA-5218826;R-HSA-5218822;R-HSA-5218820;R-HSA-5218819;R-HSA-9670418;R-HSA-9670417;R-HSA-9670416;R-HSA-9670426;R-HSA-9670414;R-HSA-9670413;R-HSA-9670412  
R-HSA-165718;R-HSA-9679044;R-HSA-165692  
R-HSA-9631987;R-HSA-194083;R-HSA-879575  
R-HSA-9670418;R-HSA-9670417;R-HSA-9670416;R-HSA-9670426;R-HSA-9670414;R-HSA-9670413;R-HSA-9670412  
R-HSA-392530;R-HSA-389756  
R-HSA-165026  
R-HSA-8936616;R-HSA-8937016;R-HSA-8937097;R-HSA-8937050;R-HSA-8935740;R-HSA-8937037;R-HSA-8936621;R-HSA-450292;R-HSA-5684261;R-HSA-450325;R-HSA-451634;R-HSA-5684275;R-HSA-451649;R-HSA-5684273;R-HSA-9013109;R-HSA-9013110  
R-HSA-9027627;R-HSA-9027532;R-HSA-9028255;R-HSA-9027607  
R-HSA-444171  
R-HSA-2399969  
R-HSA-210274;R-HSA-391156;R-HSA-419002  
R-HSA-5357776;R-HSA-5357904;R-HSA-5357860;R-HSA-5357780;R-HSA-5357757  
R-HSA-168166  
R-HSA-418662  
R-HSA-5676607  
R-HSA-6783524;R-HSA-6783552  
R-HSA-9664275;R-HSA-449058;R-HSA-9664278;R-HSA-9664261;R-HSA-448703;R-HSA-8850846  
R-HSA-1889981;R-HSA-9638064;R-HSA-1889978;R-HSA-1878002;R-HSA-1889955  
R-HSA-1013020;R-HSA-1013012  
R-HSA-1013020;R-HSA-1013012  
R-HSA-1013020;R-HSA-1013012  
R-HSA-5629237;R-HSA-5601919;R-HSA-5601897;R-HSA-5601883  
R-HSA-9612085  
R-HSA-2426530;R-HSA-4084505  
R-HSA-4420121  
R-HSA-9026408  
R-HSA-5633414;R-HSA-5633441  
R-HSA-8870346;R-HSA-2309773  
R-HSA-9021306;R-HSA-964811;R-HSA-8852481;R-HSA-375395;R-HSA-8852266  
R-HSA-8874083;R-HSA-8874082;R-HSA-8874080  
R-HSA-8937728;R-HSA-8937682  
R-HSA-5218830;R-HSA-5218828;R-HSA-5218827;R-HSA-5218826;R-HSA-5218822;R-HSA-5218820;R-HSA-5218819;R-HSA-9664275;R-HSA-9664278;R-HSA-9664261

E7\_severemild\_down\_reactome

R-HSA-4088220;R-HSA-4088281;R-HSA-199050  
R-HSA-3928651;R-HSA-3928602;R-HSA-3928648  
R-HSA-109536;R-HSA-109527;R-HSA-109529;R-HSA-109534  
R-HSA-9018880  
R-HSA-9037040  
R-HSA-114577;R-HSA-210291;R-HSA-202723;R-HSA-203156;R-HSA-8867135;R-HSA-8870732;R-HSA-202717  
R-HSA-188386;R-HSA-187552;R-HSA-187520;R-HSA-188390;R-HSA-69191;R-HSA-69195;R-HSA-69199;R-HSA-15790  
R-HSA-8850854;R-HSA-8850846  
R-HSA-8937820;R-HSA-8937844  
R-HSA-1295609  
R-HSA-199587;R-HSA-199043;R-HSA-5696358;R-HSA-5685602;R-HSA-5685600;R-HSA-199050;R-HSA-199583;R-HSA-199584  
R-HSA-5205663;R-HSA-8948143;R-HSA-8959571;R-HSA-8959573;R-HSA-5205649  
R-HSA-5653766;R-HSA-5653780;R-HSA-5653786;R-HSA-5653754;R-HSA-5653770  
R-HSA-450292;R-HSA-450325  
R-HSA-1295609  
R-HSA-419002  
R-HSA-9026408  
R-HSA-8936616;R-HSA-8937097;R-HSA-8937037;R-HSA-8936621;R-HSA-8865505;R-HSA-8937728;R-HSA-8936481;R-HSA-8936482  
R-HSA-187552;R-HSA-187520;R-HSA-8848436;R-HSA-187574;R-HSA-187575;R-HSA-187828;R-HSA-198613;R-HSA-8936481  
R-HSA-9008456;R-HSA-8937820;R-HSA-9008433;R-HSA-8937844  
R-HSA-2395412;R-HSA-2424484;R-HSA-210289;R-HSA-2424486;R-HSA-2424487;R-HSA-2424480;R-HSA-2396594;R-HSA-2396595  
R-HSA-418163;R-HSA-418176;R-HSA-418158;R-HSA-418170;R-HSA-418200  
R-HSA-139906;R-HSA-139899  
R-HSA-186819;R-HSA-380780  
R-HSA-9626832;R-HSA-5668629;R-HSA-5218827;R-HSA-5666160;R-HSA-5666129;R-HSA-75016;R-HSA-5668605;R-HSA-5668606  
R-HSA-9018758  
R-HSA-1013020;R-HSA-1013012  
R-HSA-1363303;R-HSA-1363314;R-HSA-1363311;R-HSA-1363306  
R-HSA-2076383;R-HSA-2076508;R-HSA-2076371;R-HSA-2024108;R-HSA-2022860;R-HSA-2022856;R-HSA-2076392;R-HSA-2076393  
R-HSA-1295609  
R-HSA-194083  
R-HSA-390470  
R-HSA-9661397  
R-HSA-388833;R-HSA-392530;R-HSA-388829;R-HSA-389756;R-HSA-388831  
R-HSA-201708  
R-HSA-3781001;R-HSA-3781018;R-HSA-3781021;R-HSA-3781009;R-HSA-3780995;R-HSA-3781011  
R-HSA-5672969  
R-HSA-1295609  
R-HSA-418662  
R-HSA-171011;R-HSA-170991  
R-HSA-9696271  
R-HSA-139842;R-HSA-453200;R-HSA-437118;R-HSA-114600;R-HSA-453183  
R-HSA-8937820;R-HSA-8937844  
R-HSA-9700647;R-HSA-9700648  
R-HSA-158357;R-HSA-9650473;R-HSA-158399  
R-HSA-8855747  
R-HSA-8961846  
R-HSA-5668454;R-HSA-5668534;R-HSA-5676599;R-HSA-5668404;R-HSA-5676596;R-HSA-5668467;R-HSA-5668481;R-HSA-5668482  
R-HSA-6802912;R-HSA-6802911;R-HSA-6802910;R-HSA-6803227  
R-HSA-9604499;R-HSA-933533;R-HSA-933531;R-HSA-933525;R-HSA-1028820;R-HSA-933538;R-HSA-1028819;R-HSA-1028820  
R-HSA-9726848  
R-HSA-1667005;R-HSA-2024084;R-HSA-1678694  
R-HSA-6814695;R-HSA-6806629;R-HSA-6805573;R-HSA-6814734;R-HSA-6814764;R-HSA-6805546;R-HSA-6806613;R-HSA-6806614



E7\_severemild\_down\_reactome

R-HSA-9728804  
R-HSA-2029272;R-HSA-2029273;R-HSA-2029270;R-HSA-2029271;R-HSA-2029268  
R-HSA-2316434;R-HSA-8857925  
R-HSA-2396113;R-HSA-2396337  
R-HSA-437234;R-HSA-445084  
R-HSA-1295609  
R-HSA-9018746  
R-HSA-427910;R-HSA-5617182;R-HSA-5578777  
R-HSA-205039  
R-HSA-139906;R-HSA-139899  
R-HSA-2316434;R-HSA-8857925  
R-HSA-5099886;R-HSA-4608866;R-HSA-4608825  
R-HSA-9694579;R-HSA-9694661;R-HSA-9699007;R-HSA-9697423;R-HSA-9698988  
R-HSA-2022141  
R-HSA-9706390;R-HSA-9626832;R-HSA-5668629;R-HSA-5218827;R-HSA-5666129;R-HSA-75016;R-HSA-9018758;R-HSA-9018759  
R-HSA-1013020;R-HSA-1013012  
R-HSA-419002  
R-HSA-1222376  
R-HSA-1963586  
R-HSA-9759141;R-HSA-9759186  
R-HSA-514604  
R-HSA-186819;R-HSA-380780  
R-HSA-391866  
R-HSA-8863895;R-HSA-983147;R-HSA-1236967;R-HSA-1236939;R-HSA-1236955;R-HSA-983157;R-HSA-983156;R-HSA-983155  
R-HSA-5658231;R-HSA-5658435  
R-HSA-8848436;R-HSA-8848414  
R-HSA-8848436;R-HSA-8848414  
R-HSA-427910  
R-HSA-6802935;R-HSA-6802934;R-HSA-6802933;R-HSA-6802932;R-HSA-6802927  
R-HSA-5666160;R-HSA-5666129;R-HSA-5666104;R-HSA-5666169  
R-HSA-69005  
R-HSA-9013024  
R-HSA-188386;R-HSA-187552;R-HSA-187520;R-HSA-188390;R-HSA-69191;R-HSA-69195;R-HSA-69199;R-HSA-15790  
R-HSA-5682388;R-HSA-5682896;R-HSA-8948143;R-HSA-5681981;R-HSA-5678490;R-HSA-5682011;R-HSA-5205663;R-HSA-5205664  
R-HSA-177923;R-HSA-171011;R-HSA-205319;R-HSA-1433488;R-HSA-1562641;R-HSA-9613210;R-HSA-9613213;R-HSA-9613214  
R-HSA-9661397  
R-HSA-2002440  
R-HSA-9604487  
R-HSA-9013009;R-HSA-8980691  
R-HSA-9009371;R-HSA-9023840;R-HSA-9009378;R-HSA-9023846  
R-HSA-6802919;R-HSA-9656211;R-HSA-9670418;R-HSA-6802918;R-HSA-9670417;R-HSA-9656209;R-HSA-6802916;R-HSA-6802917  
R-HSA-2404131;R-HSA-2423785;R-HSA-2429643  
R-HSA-2396395  
R-HSA-75016  
R-HSA-428701;R-HSA-428664  
R-HSA-350578  
R-HSA-75016  
R-HSA-3965444;R-HSA-3965446;R-HSA-3965447;R-HSA-3965441  
R-HSA-1454689;R-HSA-1445149  
R-HSA-205039  
R-HSA-3797226;R-HSA-3791349  
R-HSA-2197697;R-HSA-2029453;R-HSA-2029467;R-HSA-2029451;R-HSA-2029476;R-HSA-2029458  
R-HSA-629595;R-HSA-1013020;R-HSA-629596;R-HSA-629599;R-HSA-9612085;R-HSA-1013012;R-HSA-622326

E7\_severemild\_down\_reactome

R-HSA-9612219;R-HSA-1252013  
R-HSA-6789092  
R-HSA-8852362  
R-HSA-139906;R-HSA-449058;R-HSA-139899  
R-HSA-9626832;R-HSA-5668629;R-HSA-5218827;R-HSA-5666129;R-HSA-75016;R-HSA-9018758;R-HSA-9013145;R-H  
R-HSA-5357776;R-HSA-5357904;R-HSA-5357845;R-HSA-9793680;R-HSA-5357780;R-HSA-83656;R-HSA-3371385;R-H  
R-HSA-6806412;R-HSA-6806394  
R-HSA-419166  
R-HSA-549241;R-HSA-549297  
R-HSA-5682388;R-HSA-5682896;R-HSA-8948143;R-HSA-5681981;R-HSA-5678490;R-HSA-5682011;R-HSA-5205663;F  
R-HSA-2076383;R-HSA-1889981;R-HSA-9638064;R-HSA-2076508;R-HSA-1667005;R-HSA-1889978;R-HSA-2024084;F  
R-HSA-8874083;R-HSA-8874082;R-HSA-8874080  
R-HSA-1295609  
R-HSA-2404131;R-HSA-2423785;R-HSA-2429643  
R-HSA-9020261  
R-HSA-2025882;R-HSA-9690461  
R-HSA-9014424  
R-HSA-8863895  
R-HSA-6802919;R-HSA-9656211;R-HSA-6802918;R-HSA-9656209;R-HSA-6802916;R-HSA-9656215;R-HSA-6802914;F  
R-HSA-1989759  
R-HSA-141409;R-HSA-141431;R-HSA-141422;R-HSA-141439  
R-HSA-141409;R-HSA-141431;R-HSA-141422;R-HSA-141439  
R-HSA-69005  
R-HSA-8877311  
R-HSA-443910;R-HSA-158982;R-HSA-418176;R-HSA-429441;R-HSA-443905;R-HSA-114577;R-HSA-158357;R-HSA-3  
R-HSA-419002  
R-HSA-1989759  
R-HSA-2400009  
R-HSA-390470  
R-HSA-9612085  
R-HSA-202723;R-HSA-4088220;R-HSA-1592314;R-HSA-2022141;R-HSA-2534240;R-HSA-4088281;R-HSA-2426530;R  
R-HSA-187552;R-HSA-187520;R-HSA-8848436;R-HSA-187574;R-HSA-187575;R-HSA-187828;R-HSA-198613;R-HSA-8  
R-HSA-2076383;R-HSA-1889981;R-HSA-9638064;R-HSA-2076508;R-HSA-1667005;R-HSA-1889978;R-HSA-2024084;F  
R-HSA-3858491;R-HSA-5099886;R-HSA-4608866;R-HSA-3858482;R-HSA-3858480;R-HSA-4608825  
R-HSA-9018808  
R-HSA-5661184;R-HSA-5625674  
R-HSA-3928602;R-HSA-3928633;R-HSA-3928639;R-HSA-3928607;R-HSA-4093336;R-HSA-3928604;R-HSA-3928627;F  
R-HSA-390470  
R-HSA-2022141;R-HSA-2002440  
R-HSA-9759141;R-HSA-9759186;R-HSA-1222376  
R-HSA-2730860;R-HSA-2730884  
R-HSA-1013020;R-HSA-1013012  
R-HSA-2134519;R-HSA-2134506;R-HSA-170846  
R-HSA-1295609  
R-HSA-549241;R-HSA-109536;R-HSA-9631987;R-HSA-194083;R-HSA-428007;R-HSA-109527;R-HSA-109529;R-HSA-5  
R-HSA-399978  
R-HSA-9728804;R-HSA-9727919  
R-HSA-8952289  
R-HSA-205039  
R-HSA-141409;R-HSA-141431;R-HSA-141422;R-HSA-141439  
R-HSA-166726;R-HSA-2855125  
R-HSA-9612085  
R-HSA-450292;R-HSA-450325;R-HSA-3222546;R-HSA-3222533

E7\_severemild\_down\_reactome

R-HSA-5617492;R-HSA-5617661;R-HSA-5617484;R-HSA-5617486;R-HSA-5617454;R-HSA-5617672;R-HSA-5617483  
R-HSA-5617492;R-HSA-5617661;R-HSA-5617484;R-HSA-5617486;R-HSA-5617454;R-HSA-5617672;R-HSA-5617483  
R-HSA-166753;R-HSA-166726;R-HSA-166792;R-HSA-2855125  
R-HSA-5629237;R-HSA-5601919;R-HSA-5601897;R-HSA-5601883  
R-HSA-9648114  
R-HSA-6814695;R-HSA-5617492;R-HSA-6806629;R-HSA-3928633;R-HSA-9615638;R-HSA-3928639;R-HSA-9621399;F  
R-HSA-194083  
R-HSA-5632738;R-HSA-5632732  
R-HSA-8952289  
R-HSA-2730888;R-HSA-2730833  
R-HSA-9013024;R-HSA-9017507;R-HSA-9013157;R-HSA-9018758;R-HSA-9013145;R-HSA-9014424;R-HSA-9018808;F  
R-HSA-8877311  
R-HSA-9021609;R-HSA-9009371;R-HSA-9021660;R-HSA-9021596;R-HSA-9625479;R-HSA-9023840;R-HSA-9625465;F  
R-HSA-69005  
R-HSA-9755244;R-HSA-9729725;R-HSA-9768142  
R-HSA-2484822;R-HSA-1638803;R-HSA-2468287;R-HSA-1638821  
R-HSA-2134519;R-HSA-2134506;R-HSA-170846  
R-HSA-3928633;R-HSA-9615638;R-HSA-3928639;R-HSA-9621399;R-HSA-3928627;R-HSA-9621400;R-HSA-3928625;F  
R-HSA-9751024;R-HSA-9757010  
R-HSA-9755244;R-HSA-9729500;R-HSA-9729725;R-HSA-9768142  
R-HSA-2730888;R-HSA-9725206;R-HSA-2454208;R-HSA-2730860;R-HSA-2454240;R-HSA-2730851;R-HSA-2730882;F  
R-HSA-2316434;R-HSA-8857925;R-HSA-198613  
R-HSA-8850854;R-HSA-8850846  
R-HSA-427910;R-HSA-5617182;R-HSA-5578777  
R-HSA-202248  
R-HSA-399978  
R-HSA-1592314;R-HSA-2534240;R-HSA-2534160;R-HSA-3814820  
R-HSA-3790137;R-HSA-4568740;R-HSA-3222546;R-HSA-517731;R-HSA-4568737;R-HSA-9759186;R-HSA-3857308;R  
R-HSA-8856157  
R-HSA-75016  
R-HSA-3790137;R-HSA-4568740;R-HSA-3222546;R-HSA-517731;R-HSA-4568737;R-HSA-9759186;R-HSA-3857308;R  
R-HSA-9664275;R-HSA-9664261  
R-HSA-9664275;R-HSA-9664261  
R-HSA-9664275;R-HSA-9664261  
R-HSA-629595;R-HSA-1013020;R-HSA-629596;R-HSA-629599;R-HSA-9612085;R-HSA-1013012;R-HSA-622326  
R-HSA-8850854;R-HSA-8850846;R-HSA-514604  
R-HSA-428701;R-HSA-428664  
R-HSA-5637686;R-HSA-5159245;R-HSA-5244692;R-HSA-4827382  
R-HSA-5637686;R-HSA-5159245;R-HSA-5244692;R-HSA-4827382  
R-HSA-8870346;R-HSA-2309773  
R-HSA-9013157  
R-HSA-9026408;R-HSA-9027627;R-HSA-9027532;R-HSA-9028255;R-HSA-9018880;R-HSA-9020261;R-HSA-9027607  
R-HSA-9694579;R-HSA-9694661;R-HSA-9755244;R-HSA-9729500;R-HSA-9729725;R-HSA-9768142;R-HSA-9699007;F  
R-HSA-3858491;R-HSA-5099886;R-HSA-4608866;R-HSA-3965444;R-HSA-3858482;R-HSA-3965446;R-HSA-3858480;F  
R-HSA-428007  
R-HSA-2309779;R-HSA-2309787;R-HSA-2314686;R-HSA-2309773;R-HSA-2161951  
R-HSA-9679044;R-HSA-9690461  
R-HSA-2404131;R-HSA-2423785;R-HSA-2429643  
R-HSA-69005  
R-HSA-2316434;R-HSA-8857925;R-HSA-198613  
R-HSA-9624033;R-HSA-9698926  
R-HSA-2730882  
R-HSA-5661184;R-HSA-5625674

E7\_severemild\_down\_reactome

R-HSA-749448;R-HSA-749452;R-HSA-379048  
R-HSA-2404131;R-HSA-2423785;R-HSA-8870346;R-HSA-2309773;R-HSA-2429643  
R-HSA-8964252;R-HSA-8964287;R-HSA-9624014;R-HSA-8964278  
R-HSA-2025882;R-HSA-9690461  
R-HSA-9013145  
R-HSA-139906;R-HSA-139899  
R-HSA-2467809;R-HSA-2467811  
R-HSA-1176059  
R-HSA-187520;R-HSA-375302;R-HSA-8942607;R-HSA-75016;R-HSA-1638803;R-HSA-69005;R-HSA-8852362;R-HSA-  
R-HSA-3560804;R-HSA-9036283;R-HSA-3656261;R-HSA-3560802;R-HSA-9036285;R-HSA-3656257;R-HSA-9036289;F  
R-HSA-983147;R-HSA-983157;R-HSA-983156;R-HSA-983140  
R-HSA-3928633;R-HSA-8855747;R-HSA-3928639;R-HSA-3928627;R-HSA-3928625;R-HSA-3928631;R-HSA-3928628;F  
R-HSA-427910  
R-HSA-5618328  
R-HSA-9648114;R-HSA-2484822;R-HSA-375302;R-HSA-1638803;R-HSA-2468287;R-HSA-1638821  
R-HSA-8852362  
R-HSA-9657603;R-HSA-5658231;R-HSA-5672980;R-HSA-5672978;R-HSA-5658435;R-HSA-9657606;R-HSA-5672972;F  
R-HSA-8852362  
R-HSA-9657603;R-HSA-5658231;R-HSA-5672980;R-HSA-5672978;R-HSA-5658435;R-HSA-9657606;R-HSA-5672972;F  
R-HSA-427910;R-HSA-5617182;R-HSA-5578777  
R-HSA-9011241  
R-HSA-2076383;R-HSA-2076508;R-HSA-2024084;R-HSA-2076371;R-HSA-2022860;R-HSA-2022856;R-HSA-2022919;F  
R-HSA-9694579;R-HSA-9729500;R-HSA-9729725;R-HSA-9699007;R-HSA-9690461;R-HSA-9728804;R-HSA-9694661;F  
R-HSA-2467809;R-HSA-2467811  
R-HSA-2467809;R-HSA-2467811  
R-HSA-71217;R-HSA-452036;R-HSA-977324;R-HSA-350578;R-HSA-70569  
R-HSA-9657603;R-HSA-5658231;R-HSA-5672980;R-HSA-5672978;R-HSA-5658435;R-HSA-9657606;R-HSA-5672972;F  
R-HSA-629595;R-HSA-1013020;R-HSA-629596;R-HSA-629599;R-HSA-9612085;R-HSA-1013012;R-HSA-622326  
R-HSA-9624033;R-HSA-9698926  
R-HSA-187520;R-HSA-375302;R-HSA-2467809;R-HSA-69191;R-HSA-2467811;R-HSA-8942607;R-HSA-69195;R-HSA-  
R-HSA-9036289;R-HSA-3656254;R-HSA-9036290;R-HSA-3791349;R-HSA-4420365;R-HSA-3560804;R-HSA-9036283;F  
R-HSA-2309779;R-HSA-165026;R-HSA-2309787;R-HSA-2314686;R-HSA-2309773;R-HSA-2161951  
R-HSA-194083  
R-HSA-3858491;R-HSA-5099886;R-HSA-4608866;R-HSA-3965444;R-HSA-3858482;R-HSA-3965446;R-HSA-3858480;F  
R-HSA-5618328  
R-HSA-8937097;R-HSA-8865280;R-HSA-8937728;R-HSA-5632732;R-HSA-8936979;R-HSA-187934;R-HSA-6806394;R-  
R-HSA-9664275;R-HSA-9694579;R-HSA-449058;R-HSA-9664278;R-HSA-9729500;R-HSA-9729725;R-HSA-1176059;R-  
R-HSA-5653766;R-HSA-5653780;R-HSA-5653786;R-HSA-5653754;R-HSA-5653770  
R-HSA-427910;R-HSA-549241;R-HSA-109536;R-HSA-9631987;R-HSA-194083;R-HSA-428007;R-HSA-109527;R-HSA-  
R-HSA-191654;R-HSA-191636;R-HSA-1454689;R-HSA-8877311;R-HSA-191656;R-HSA-1445149  
R-HSA-9648114;R-HSA-2484822;R-HSA-375302;R-HSA-2467809;R-HSA-2467811;R-HSA-1638803;R-HSA-2468287;R-  
R-HSA-8937097;R-HSA-8865280;R-HSA-8937728;R-HSA-5632732;R-HSA-8936979;R-HSA-187934;R-HSA-6806394;R-  
R-HSA-9664275;R-HSA-6802919;R-HSA-9656211;R-HSA-9670418;R-HSA-6802918;R-HSA-9670417;R-HSA-9656209;F  
R-HSA-8937097;R-HSA-8865280;R-HSA-8937728;R-HSA-5632732;R-HSA-5601883;R-HSA-8936979;R-HSA-187934;R-  
R-HSA-191654;R-HSA-191636;R-HSA-1454689;R-HSA-8877311;R-HSA-191656;R-HSA-1445149  
R-HSA-165026;R-HSA-9026408;R-HSA-1989759;R-HSA-194083;R-HSA-9027627;R-HSA-390438;R-HSA-9027532;R-HS  
R-HSA-77609;R-HSA-83677  
R-HSA-8870469;R-HSA-8870466;R-HSA-162836;R-HSA-8952289;R-HSA-162729;R-HSA-8940388  
R-HSA-976734;R-HSA-8870469;R-HSA-390470;R-HSA-5676917;R-HSA-8870466;R-HSA-162836;R-HSA-8952289;R-HS  
R-HSA-2404131;R-HSA-2423785;R-HSA-2429643  
R-HSA-2404131;R-HSA-9018880;R-HSA-2024084;R-HSA-9028255;R-HSA-2022919;R-HSA-8850846;R-HSA-428701;R-

E7\_severemild\_down\_reactome

;R-HSA-5621356;R-HSA-2272795;R-HSA-5621353;R-HSA-5621352;R-HSA-5621355;R-HSA-89376  
R-HSA-8937656;R-HSA-5340385;R-HSA-5668454;R-HSA-446130;R-HSA-451634;R-HSA-448703;R-

69405;R-HSA-1169404;R-HSA-1031713;R-HSA-1169406;R-HSA-8983671

.-446894;R-HSA-6790029;R-HSA-6789325;R-HSA-446701;R-HSA-446634;R-HSA-8937656;R-HSA-5

-HSA-5621352;R-HSA-5621355;R-HSA-879411;R-HSA-5621354;R-HSA-5432849;R-HSA-166726;R-

0073;R-HSA-379048;R-HSA-374248;R-HSA-374251;R-HSA-201708;R-HSA-373813;R-HSA-444661;  
83671

548;R-HSA-445753

E7\_severemild\_down\_reactome

937059;R-HSA-937022;R-HSA-450292;R-HSA-5684261;R-HSA-451634;R-HSA-937079;R-HSA-166072

5684261;R-HSA-451634;R-HSA-937079;R-HSA-166072;R-HSA-5684267  
5684261;R-HSA-451634;R-HSA-937079;R-HSA-166072;R-HSA-5684267

5684261;R-HSA-451634;R-HSA-937079;R-HSA-166072;R-HSA-5684267  
5684261;R-HSA-451634;R-HSA-937079;R-HSA-166072;R-HSA-5684267

267;R-HSA-445752;R-HSA-446648;R-HSA-445753

975188;R-HSA-2262777;R-HSA-168166;R-HSA-5684275;R-HSA-166119;R-HSA-166245;R-HSA-166072

E7\_severemild\_down\_reactome

-HSA-2395801;R-HSA-2272668;R-HSA-210300;R-HSA-2172126

ISA-114600;R-HSA-377644;R-HSA-443439;R-HSA-377641;R-HSA-377640;R-HSA-377643;R-HSA-3

E7\_severemild\_down\_reactome

218811;R-HSA-5357477;R-HSA-5218809;R-HSA-5357479;R-HSA-3928647

218811;R-HSA-5357477;R-HSA-5218809;R-HSA-5357479;R-HSA-3928647

E7\_severemild\_down\_reactome

.-5685602;R-HSA-1236967;R-HSA-5685600;R-HSA-389756;R-HSA-983157;R-HSA-983156

2;R-HSA-188350;R-HSA-1226094;R-HSA-8942836;R-HSA-1226095;R-HSA-1363306;R-HSA-896184

28;R-HSA-5626988;R-HSA-8863101;R-HSA-83582

5;R-HSA-1470012;R-HSA-9017507;R-HSA-1470010;R-HSA-4420206;R-HSA-1470009;R-HSA-3738

3157;R-HSA-5666104;R-HSA-5666169;R-HSA-9018808;R-HSA-9626848;R-HSA-9018746;R-HSA-9

9;R-HSA-9613219;R-HSA-205234;R-HSA-9700647;R-HSA-5218811;R-HSA-205238;R-HSA-961347

802924;R-HSA-6802922;R-HSA-9725338;R-HSA-6802921;R-HSA-6802935;R-HSA-6802934;R-HSA

E7\_severemild\_down\_reactome

6104;R-HSA-5666169;R-HSA-9018808;R-HSA-9626848;R-HSA-9018746;R-HSA-9013109;R-HSA-94;R-HSA-5357928;R-HSA-5626988;R-HSA-8863101;R-HSA-83582

802932;R-HSA-6802943;R-HSA-6802942;R-HSA-6802941;R-HSA-6802911;R-HSA-6802910;R-HSA

ISA-8867135;R-HSA-453183;R-HSA-9650473;R-HSA-158399;R-HSA-139842;R-HSA-354124;R-HSA/

678694

928614;R-HSA-3928645;R-HSA-3928580

E7\_severemild\_down\_reactome

17486;R-HSA-381337;R-HSA-3928615;R-HSA-3928614;R-HSA-5617483;R-HSA-9011241;R-HSA-3

4773;R-HSA-3928604;R-HSA-9614778;R-HSA-374701;R-HSA-3928594;R-HSA-418858;R-HSA-418

3;R-HSA-187934;R-HSA-3788708

3;R-HSA-187934;R-HSA-3788708

E7\_severemild\_down\_reactome

51846;R-HSA-6803801;R-HSA-2467809;R-HSA-69191;R-HSA-2467811;R-HSA-69195;R-HSA-69196

;R-HSA-418859;R-HSA-418856;R-HSA-3928651;R-HSA-4093327;R-HSA-418868;R-HSA-3928648;F

076392;R-HSA-2022887;R-HSA-2024100;R-HSA-2022052;R-HSA-3780995;R-HSA-1889955;R-HSA

390;R-HSA-1363314;R-HSA-9018017;R-HSA-69227;R-HSA-1363303;R-HSA-8848436;R-HSA-24846

628;R-HSA-9617838;R-HSA-6803801;R-HSA-9008456;R-HSA-6803875;R-HSA-8937037;R-HSA-96  
423;R-HSA-9698926;R-HSA-9698988

628;R-HSA-9617838;R-HSA-6803801;R-HSA-9008456;R-HSA-6803875;R-HSA-8937037;R-HSA-96  
802925;R-HSA-9036290;R-HSA-6802924;R-HSA-6802922;R-HSA-9725338;R-HSA-6802921;R-HSA  
562;R-HSA-8935731;R-HSA-5601897;R-HSA-8936628;R-HSA-9617838;R-HSA-6803801;R-HSA-90

8;R-HSA-70569;R-HSA-3781009;R-HSA-3781011;R-HSA-514604;R-HSA-2309773;R-HSA-2309779



E7\_severemild\_down\_reactome

072;R-HSA-166271;R-HSA-5684267

3933;R-HSA-5684273;R-HSA-937059;R-HSA-937022;R-HSA-450292;R-HSA-5684261;R-HSA-45163

E7\_severemild\_down\_reactome

54165;R-HSA-418163;R-HSA-437118;R-HSA-453183;R-HSA-418170



013109;R-HSA-9013110

6;R-HSA-5218809;R-HSA-1433506;R-HSA-9612073;R-HSA-9700648;R-HSA-1252013;R-HSA-96120

6;R-HSA-6802933;R-HSA-6802932;R-HSA-6802943;R-HSA-6802942;R-HSA-6802941;R-HSA-9670414;R-HSA-

013110

\-6803230;R-HSA-6803227

\-8870732;R-HSA-158925;R-HSA-372693;R-HSA-482772;R-HSA-453200;R-HSA-158942;R-HSA-37

E7\_severemild\_down\_reactome

928602;R-HSA-6805573;R-HSA-418850;R-HSA-3928607;R-HSA-9617207;R-HSA-4093336;R-HSA-4

859;R-HSA-418856;R-HSA-9621410;R-HSA-9621411;R-HSA-4093327;R-HSA-418868;R-HSA-3928!

);R-HSA-157906;R-HSA-8941915;R-HSA-198613;R-HSA-8942803;R-HSA-6803388;R-HSA-188386;

R-HSA-3928584;R-HSA-416690;R-HSA-437234;R-HSA-418865;R-HSA-3928642;R-HSA-3928641;R-

-1678694

322;R-HSA-187574;R-HSA-187575;R-HSA-187828;R-HSA-1363311;R-HSA-69562;R-HSA-188350;R

18004;R-HSA-8937807;R-HSA-8937792;R-HSA-8937050;R-HSA-6803892;R-HSA-5633414;R-HSA-}

18004;R-HSA-8937807;R-HSA-8937792;R-HSA-8937050;R-HSA-6803892;R-HSA-5633414;R-HSA-  
-6802935;R-HSA-6802934;R-HSA-6802933;R-HSA-9651456;R-HSA-8876948;R-HSA-6802932;R-H:  
08456;R-HSA-6803875;R-HSA-8937037;R-HSA-9618004;R-HSA-8937807;R-HSA-8937792;R-HSA-}

;R-HSA-71217;R-HSA-3781001;R-HSA-2024108;R-HSA-2309787;R-HSA-2024100;R-HSA-2022052;

E7\_severemild\_down\_reactome

426;R-HSA-5684248;R-HSA-9013979;R-HSA-9013978;R-HSA-450133;R-HSA-6800434;R-HSA-4491  
A-6783524;R-HSA-6784160;R-HSA-451649;R-HSA-8985153;R-HSA-5684250;R-HSA-8985157;R-HS

I51634;R-HSA-448703;R-HSA-445757;R-HSA-5684267;R-HSA-445752;R-HSA-446648;R-HSA-6790

3-HSA-9013979;R-HSA-9013978;R-HSA-6800434;R-HSA-975188;R-HSA-210271;R-HSA-210274;R-

E7\_severemild\_down\_reactome

4;R-HSA-937079;R-HSA-166072;R-HSA-166271;R-HSA-5684267

076;R-HSA-1433514;R-HSA-205244;R-HSA-9031624;R-HSA-1433428;R-HSA-5218830;R-HSA-1868

SA-9670413;R-HSA-9670412;R-HSA-9698043;R-HSA-9698041;R-HSA-2400009;R-HSA-6802911;R-

E7\_severemild\_down\_reactome

2697;R-HSA-202717;R-HSA-418662;R-HSA-354149;R-HSA-202723;R-HSA-429415;R-HSA-372705

E7\_severemild\_down\_reactome

9614773;R-HSA-3928604;R-HSA-9614778;R-HSA-5617661;R-HSA-374701;R-HSA-3928594;R-HSA

584;R-HSA-416690;R-HSA-9618725;R-HSA-418865;R-HSA-418874;R-HSA-3928583;R-HSA-392858

E7\_severemild\_down\_reactome

R-HSA-9648114;R-HSA-141409;R-HSA-188390;R-HSA-1363314;R-HSA-69227;R-HSA-141422;R-H

HSA-3928640;R-HSA-418874;R-HSA-3928583;R-HSA-3928645;R-HSA-3928580;R-HSA-391866

;R-HSA-1226094;R-HSA-8942836;R-HSA-1638821;R-HSA-1226095;R-HSA-1363306;R-HSA-8961846

3937820;R-HSA-8865491;R-HSA-6803890;R-HSA-8937682;R-HSA-6803388;R-HSA-8865244;R-HS

3937820;R-HSA-8865491;R-HSA-6803890;R-HSA-8937682;R-HSA-6803388;R-HSA-8865244;R-HS,  
SA-9659782;R-HSA-9664261;R-HSA-9651467;R-HSA-6802943;R-HSA-8850846;R-HSA-6802942;R-  
3937050;R-HSA-6803892;R-HSA-5633414;R-HSA-8937820;R-HSA-8865491;R-HSA-6803890;R-HS,

;R-HSA-3780995;R-HSA-2161951;R-HSA-1889955;R-HSA-2076383;R-HSA-452036;R-HSA-2076508

E7\_severemild\_down\_reactome

L17;R-HSA-6793275;R-HSA-5676599;R-HSA-5668404;R-HSA-5676596;R-HSA-983147;R-HSA-5684  
;A-5684248;R-HSA-450133;R-HSA-5668481;R-HSA-446684;R-HSA-449117;R-HSA-1678841;R-HSA

041;R-HSA-8937654;R-HSA-445753

HSA-210273;R-HSA-166753;R-HSA-5684275;R-HSA-375395;R-HSA-166245;R-HSA-5684273;R-HS

319;R-HSA-5218828;R-HSA-5218827;R-HSA-5218826;R-HSA-9031616;R-HSA-5218822;R-HSA-960

·HSA-6802910;R-HSA-6803230;R-HSA-6803227

E7\_severemild\_down\_reactome

;R-HSA-432096;R-HSA-481007;R-HSA-418158;R-HSA-210282;R-HSA-158959;R-HSA-354165;R-HS

E7\_severemild\_down\_reactome

-418858;R-HSA-418859;R-HSA-418856;R-HSA-9621410;R-HSA-9621411;R-HSA-4093327;R-HSA-6

30;R-HSA-391866;R-HSA-9619667;R-HSA-8855747;R-HSA-9614787;R-HSA-373716;R-HSA-961376

SA-1363303;R-HSA-2484822;R-HSA-141431;R-HSA-1363311;R-HSA-1226094;R-HSA-8942836;R-H

A-8865498;R-HSA-8937814;R-HSA-9768950;R-HSA-9768945;R-HSA-8878178;R-HSA-8865505;R-H

A-8865498;R-HSA-8937814;R-HSA-9768950;R-HSA-9768945;R-HSA-8878178;R-HSA-8865505;R-H  
-HSA-5602383;R-HSA-6802941;R-HSA-9650447;R-HSA-9697423;R-HSA-9670414;R-HSA-9670413;  
A-8937682;R-HSA-6803388;R-HSA-8865244;R-HSA-8865498;R-HSA-8937814;R-HSA-5629237;R-H

;R-HSA-9027532;R-HSA-9661397;R-HSA-1475025;R-HSA-2076371;R-HSA-2423785;R-HSA-88703

E7\_severemild\_down\_reactome

I275;R-HSA-375395;R-HSA-5684273;R-HSA-5668414;R-HSA-5676607;R-HSA-983140;R-HSA-9370  
A-446694;R-HSA-5668534;R-HSA-6790022;R-HSA-5676599;R-HSA-446692;R-HSA-1169395;R-HSA

A-937059;R-HSA-6801687;R-HSA-2730843;R-HSA-210289;R-HSA-5684261;R-HSA-210295;R-HSA

E7\_severemild\_down\_reactome

)3419;R-HSA-5218820;R-HSA-5218819;R-HSA-9603420;R-HSA-9612483;R-HSA-1433542;R-HSA-5

E7\_severemild\_down\_reactome

∫A-210291;R-HSA-418163;R-HSA-437118;R-HSA-418170

E7\_severemild\_down\_reactome

806613;R-HSA-418868;R-HSA-3928584;R-HSA-416690;R-HSA-6806610;R-HSA-9618725;R-HSA-4

0;R-HSA-416725;R-HSA-9614790;R-HSA-9613768;R-HSA-9619657;R-HSA-9616116;R-HSA-96185

HSA-1226095;R-HSA-141439;R-HSA-1363306

HSA-6806412;R-HSA-8878186;R-HSA-8865256;R-HSA-9614562;R-HSA-5633441;R-HSA-6803871;R

HSA-6806412;R-HSA-8878186;R-HSA-8865256;R-HSA-9614562;R-HSA-5633441;R-HSA-6803871;R  
;R-HSA-5625674;R-HSA-9670412;R-HSA-449058;R-HSA-5602672;R-HSA-9729725;R-HSA-9699007  
HSA-9768950;R-HSA-9768945;R-HSA-8878178;R-HSA-8865505;R-HSA-6806412;R-HSA-8878186;R

46;R-HSA-2022860;R-HSA-2022856;R-HSA-2076611;R-HSA-2022851;R-HSA-1475017;R-HSA-902

E7\_severemild\_down\_reactome

159;R-HSA-5684261;R-HSA-389756;R-HSA-937079;R-HSA-983157;R-HSA-983156;R-HSA-936563;F  
1678843;R-HSA-5668404;R-HSA-5676596;R-HSA-1169394;R-HSA-1678842;R-HSA-1169397;R-H

1210292;R-HSA-2730833;R-HSA-937079;R-HSA-210298;R-HSA-166271;R-HSA-936563;R-HSA-56

E7\_severemild\_down\_reactome

i218841;R-HSA-5218839;R-HSA-5218838;R-HSA-4420121;R-HSA-9612493;R-HSA-1963586;R-HSA

E7\_severemild\_down\_reactome

.18865;R-HSA-9617064;R-HSA-418874;R-HSA-3928583;R-HSA-6814298;R-HSA-3928580;R-HSA-3

59;R-HSA-3928651;R-HSA-3928648;R-HSA-437234;R-HSA-3928642;R-HSA-3928641;R-HSA-3928

!-HSA-8937844

!-HSA-8937844  
7;R-HSA-2400009;R-HSA-9728804;R-HSA-6802911;R-HSA-448703;R-HSA-6802910;R-HSA-972791  
!-HSA-8865256;R-HSA-9614562;R-HSA-5633441;R-HSA-6803871;R-HSA-8937844

!6408;R-HSA-1989759;R-HSA-9020261;R-HSA-399978;R-HSA-2429643;R-HSA-1878002;R-HSA-75

E7\_severemild\_down\_reactome

R-HSA-5684267;R-HSA-2424484;R-HSA-2424486;R-HSA-2424487;R-HSA-2424480;R-HSA-885248  
SA-168166;R-HSA-5684275;R-HSA-1169399;R-HSA-1169398;R-HSA-5684273;R-HSA-5668414;R-H

34267;R-HSA-210300;R-HSA-2424484;R-HSA-9725206;R-HSA-2424486;R-HSA-2424487;R-HSA-67

E7\_severemild\_down\_reactome

\-1433418;R-HSA-4420128;R-HSA-9612534;R-HSA-8874083;R-HSA-8874082;R-HSA-1433456;R-H

E7\_severemild\_down\_reactome

91866;R-HSA-9619667;R-HSA-8855747;R-HSA-9616214;R-HSA-381377;R-HSA-6814764;R-HSA-6:

640;R-HSA-3928645

E7\_severemild\_down\_reactome

.9;R-HSA-9698988;R-HSA-2399969;R-HSA-6803234;R-HSA-6803233;R-HSA-9729500;R-HSA-1123

887;R-HSA-2076392;R-HSA-350578;R-HSA-2022887;R-HSA-428664;R-HSA-1678694

E7\_severemild\_down\_reactome

1;R-HSA-2424482;R-HSA-8985091;R-HSA-933533;R-HSA-933531;R-HSA-2454192;R-HSA-933525;  
HSA-5676607;R-HSA-6790029;R-HSA-1176059;R-HSA-1169403;R-HSA-446701;R-HSA-1169402;R-

789092;R-HSA-2424480;R-HSA-2029467;R-HSA-8852481;R-HSA-210309;R-HSA-2424482;R-HSA-1

E7\_severemild\_down\_reactome

SA-8874080;R-HSA-9603445;R-HSA-5218855;R-HSA-380780;R-HSA-1295609;R-HSA-5218851;R-H

E7\_severemild\_down\_reactome

805546;R-HSA-9624668;R-HSA-9614787;R-HSA-373716;R-HSA-9613760;R-HSA-416725;R-HSA-68

E7\_severemild\_down\_reactome

33;R-HSA-3791349;R-HSA-4420365;R-HSA-9690461;R-HSA-3560804;R-HSA-3797226;R-HSA-356

E7\_severemild\_down\_reactome

R-HSA-6798528;R-HSA-6789325;R-HSA-933538;R-HSA-446634;R-HSA-933536;R-HSA-5340385;R  
HSA-1169405;R-HSA-1169404;R-HSA-1169406;R-HSA-450292;R-HSA-6789524;R-HSA-5684261;R

.66792;R-HSA-166286;R-HSA-2029458;R-HSA-2029459;R-HSA-166284;R-HSA-6799350;R-HSA-25

E7\_severemild\_down\_reactome

HSA-170991;R-HSA-1472121;R-HSA-4420140;R-HSA-5357477;R-HSA-5357479;R-HSA-9037040;R-

E7\_severemild\_down\_reactome

314387;R-HSA-9614790;R-HSA-6809393;R-HSA-6809663;R-HSA-9613768;R-HSA-9619657;R-HSA

E7\_severemild\_down\_reactome

0802;R-HSA-9694661;R-HSA-5661184;R-HSA-9679044;R-HSA-9768142;R-HSA-9694579;R-HSA-5

E7\_severemild\_down\_reactome

!-HSA-446130;R-HSA-448703;R-HSA-166072;R-HSA-2395801;R-HSA-446648;R-HSA-166082;R-HS  
!-HSA-6790036;R-HSA-5684267;R-HSA-8983671;R-HSA-6790041

59414;R-HSA-2029455;R-HSA-2029452;R-HSA-933533;R-HSA-2029453;R-HSA-933531;R-HSA-24

E7\_severemild\_down\_reactome

HSA-1433454;R-HSA-3928647;R-HSA-1433451;R-HSA-9603437

E7\_severemild\_down\_reactome

-5617672;R-HSA-6810937;R-HSA-9616243;R-HSA-560491;R-HSA-9616116;R-HSA-8865505;R-HS/

E7\_severemild\_down\_reactome

602353;R-HSA-9698043;R-HSA-1176059;R-HSA-9698041;R-HSA-9036283;R-HSA-3656261;R-HSA

E7\_severemild\_down\_reactome

A-2201316;R-HSA-2454240;R-HSA-964811;R-HSA-2029272;R-HSA-6784160;R-HSA-2130151;R-H

54192;R-HSA-2029451;R-HSA-2396594;R-HSA-2029449;R-HSA-5660622;R-HSA-933525;R-HSA-5

E7\_severemild\_down\_reactome

A-381283;R-HSA-6814734;R-HSA-9618559;R-HSA-9634429;R-HSA-3928651;R-HSA-3928648;R-HS

E7\_severemild\_down\_reactome

.-9624033;R-HSA-9036285;R-HSA-3656257;R-HSA-9755244;R-HSA-6803230;R-HSA-5602606;R-HS

E7\_severemild\_down\_reactome

SA-2029273;R-HSA-8985153;R-HSA-2029270;R-HSA-166091;R-HSA-2029271;R-HSA-2029268;R-H

660663;R-HSA-2730888;R-HSA-6798528;R-HSA-2730882;R-HSA-933538;R-HSA-8852266;R-HSA-4

E7\_severemild\_down\_reactome

;A-6811539;R-HSA-437234;R-HSA-3928642;R-HSA-977271;R-HSA-3928641;R-HSA-5617454;R-HS

E7\_severemild\_down\_reactome

3A-3656267;R-HSA-6803227;R-HSA-9698926

E7\_severemild\_down\_reactome

HSA-2201322;R-HSA-8985157;R-HSA-2262775;R-HSA-918232;R-HSA-5668481;R-HSA-388829;R-H

2730884;R-HSA-933536;R-HSA-2730886;R-HSA-6789072;R-HSA-166072;R-HSA-2029476;R-HSA-2

E7\_severemild\_down\_reactome

A-3928640;R-HSA-3928645;R-HSA-977392

E7\_severemild\_down\_reactome

HSA-1028821;R-HSA-446684;R-HSA-388831;R-HSA-8856157;R-HSA-918229;R-HSA-1028820;R-HS

?395801;R-HSA-2272668;R-HSA-166082;R-HSA-2201316;R-HSA-2454240;R-HSA-964811;R-HSA-2

E7\_severemild\_down\_reactome

5A-2262777;R-HSA-8862300;R-HSA-1028819;R-HSA-1028816;R-HSA-446694;R-HSA-5668534;R-H

!029272;R-HSA-2130151;R-HSA-2029273;R-HSA-2029270;R-HSA-166091;R-HSA-2029271;R-HSA-

E7\_severemild\_down\_reactome

SA-2197697;R-HSA-446692;R-HSA-2426566;R-HSA-168166;R-HSA-388833;R-HSA-166119;R-HSA

2029268;R-HSA-2201322;R-HSA-2272753;R-HSA-2262775;R-HSA-918232;R-HSA-166362;R-HSA-

E7\_severemild\_down\_reactome

\-2454208;R-HSA-446701;R-HSA-2426569;R-HSA-6798474;R-HSA-450292;R-HSA-8862320;R-HSA

166363;R-HSA-1028821;R-HSA-918229;R-HSA-1028820;R-HSA-2262777;R-HSA-8862300;R-HSA-

E7\_severemild\_down\_reactome

,-2454239;R-HSA-2172123;R-HSA-8983671;R-HSA-2855125;R-HSA-2172126;R-HSA-975118;R-HS.

1028819;R-HSA-1028816;R-HSA-2197697;R-HSA-2426566;R-HSA-168166;R-HSA-168935;R-HSA-:

E7\_severemild\_down\_reactome

A-6785895;R-HSA-9604499;R-HSA-2395439;R-HSA-975106;R-HSA-879362;R-HSA-5607750;R-HS/

l66119;R-HSA-2454208;R-HSA-168933;R-HSA-1861621;R-HSA-2426569;R-HSA-6798474;R-HSA-6

E7\_severemild\_down\_reactome

A-450325;R-HSA-9604487;R-HSA-2395412;R-HSA-5696358;R-HSA-5685602;R-HSA-5685600;R-HS

;798743;R-HSA-450292;R-HSA-9021306;R-HSA-6798739;R-HSA-8862320;R-HSA-6798751;R-HSA-

E7\_severemild\_down\_reactome

5A-445757;R-HSA-445752;R-HSA-879411;R-HSA-445753;R-HSA-507719;R-HSA-166726;R-HSA-27

6798749;R-HSA-2454239;R-HSA-2172123;R-HSA-6798748;R-HSA-6798747;R-HSA-6798745;R-HS

E7\_severemild\_down\_reactome

30860;R-HSA-2730851;R-HSA-

2855125;R-HSA-2172126

Pathway identifier

R-HSA-6798695  
R-HSA-6783783  
R-HSA-168256  
R-HSA-168249  
R-HSA-380108  
R-HSA-1280215  
R-HSA-375276  
R-HSA-449147  
R-HSA-373076  
R-HSA-9031628  
R-HSA-6785807  
R-HSA-198725  
R-HSA-418594  
R-HSA-500792  
R-HSA-372790  
R-HSA-5668599  
R-HSA-5660668  
R-HSA-388396  
R-HSA-1236973  
R-HSA-187037  
R-HSA-913531  
R-HSA-909733  
R-HSA-6803157  
R-HSA-391160  
R-HSA-166520  
R-HSA-3296197  
R-HSA-5602498  
R-HSA-1236975  
R-HSA-5603041  
R-HSA-444473  
R-HSA-448706  
R-HSA-5686938  
R-HSA-6799990  
R-HSA-5602358  
R-HSA-5260271  
R-HSA-5621481  
R-HSA-6803211  
R-HSA-1222556  
R-HSA-1638074  
R-HSA-166058  
R-HSA-168188  
R-HSA-2022857  
R-HSA-2559582  
R-HSA-9660826  
R-HSA-9664424  
R-HSA-168179  
R-HSA-181438  
R-HSA-9657689  
R-HSA-2243919  
R-HSA-9725371  
R-HSA-2206308  
R-HSA-3656535

E8\_severecontrol\_down\_reactome

R-HSA-877300  
R-HSA-9634638  
R-HSA-5621480  
R-HSA-3299685  
R-HSA-1296059  
R-HSA-997272  
R-HSA-1296041  
R-HSA-166016  
R-HSA-5578996  
R-HSA-380994  
R-HSA-5620971  
R-HSA-5607764  
R-HSA-9006934  
R-HSA-3656534  
R-HSA-420597  
R-HSA-9020702  
R-HSA-1296065  
R-HSA-416476  
R-HSA-9619665  
R-HSA-4341670  
R-HSA-75094  
R-HSA-1482788  
R-HSA-9768919  
R-HSA-1500931  
R-HSA-381042  
R-HSA-9027283  
R-HSA-3304351  
R-HSA-2024096  
R-HSA-2562578  
R-HSA-162791  
R-HSA-72200  
R-HSA-9013404  
R-HSA-162582  
R-HSA-2559583  
R-HSA-168898  
R-HSA-977444  
R-HSA-991365  
R-HSA-2025928  
R-HSA-450341  
R-HSA-2855086  
R-HSA-75072  
R-HSA-9013423  
R-HSA-9027277  
R-HSA-2468052  
R-HSA-6803544  
R-HSA-140342  
R-HSA-1236978  
R-HSA-2172127  
R-HSA-166658  
R-HSA-1483191  
R-HSA-75205  
R-HSA-210990  
R-HSA-166662

E8\_severecontrol\_down\_reactome

R-HSA-2214320  
R-HSA-8983711  
R-HSA-381340  
R-HSA-9027276  
R-HSA-879415  
R-HSA-75892  
R-HSA-9634815  
R-HSA-2559584  
R-HSA-5676594  
R-HSA-1475029  
R-HSA-6788467  
R-HSA-163125  
R-HSA-983169  
R-HSA-975138  
R-HSA-975155  
R-HSA-399956  
R-HSA-1433559  
R-HSA-1483115  
R-HSA-418457  
R-HSA-975163  
R-HSA-168181  
R-HSA-9725370  
R-HSA-9700206  
R-HSA-9027284  
R-HSA-937072  
R-HSA-399954  
R-HSA-2173791  
R-HSA-416700  
R-HSA-166166  
R-HSA-937061  
R-HSA-168138  
R-HSA-2022090  
R-HSA-977443  
R-HSA-936964  
R-HSA-399955  
R-HSA-399997  
R-HSA-140534  
R-HSA-446652  
R-HSA-8956321  
R-HSA-9671793  
R-HSA-9651496  
R-HSA-9616222  
R-HSA-4420097  
R-HSA-2142770  
R-HSA-5218859  
R-HSA-9013149  
R-HSA-202733  
R-HSA-1650814  
R-HSA-937041  
R-HSA-912631  
R-HSA-844456  
R-HSA-389513  
R-HSA-70221

E8\_severecontrol\_down\_reactome

R-HSA-1482922  
R-HSA-6809371  
R-HSA-977606  
R-HSA-194138  
R-HSA-140837  
R-HSA-9705462  
R-HSA-5633008  
R-HSA-9670439  
R-HSA-166208  
R-HSA-9669938  
R-HSA-196807  
R-HSA-211935  
R-HSA-9027604  
R-HSA-444209  
R-HSA-982772  
R-HSA-1660662  
R-HSA-1638091  
R-HSA-211999  
R-HSA-933542  
R-HSA-5621575  
R-HSA-6783589  
R-HSA-977225  
R-HSA-3000157  
R-HSA-9025094  
R-HSA-9018519  
R-HSA-70635  
R-HSA-5357769  
R-HSA-1483206  
R-HSA-3928663  
R-HSA-1483213  
R-HSA-9018679  
R-HSA-425410  
R-HSA-73614  
R-HSA-622312  
R-HSA-9006335  
R-HSA-9674555  
R-HSA-418990  
R-HSA-392154  
R-HSA-450282  
R-HSA-9018683  
R-HSA-2022854  
R-HSA-2206281  
R-HSA-193807  
R-HSA-9658195  
R-HSA-5357801  
R-HSA-2029481  
R-HSA-1474290  
R-HSA-1236974  
R-HSA-8939236  
R-HSA-5365859  
R-HSA-8982491  
R-HSA-389356  
R-HSA-1296071

E8\_severecontrol\_down\_reactome

R-HSA-1482839  
R-HSA-8957275  
R-HSA-975871  
R-HSA-168176  
R-HSA-168142  
R-HSA-114604  
R-HSA-140877  
R-HSA-9009391  
R-HSA-1630316  
R-HSA-419037  
R-HSA-8948216  
R-HSA-195258  
R-HSA-193775  
R-HSA-74217  
R-HSA-8939211  
R-HSA-9035034  
R-HSA-3781860  
R-HSA-168164  
R-HSA-2672351  
R-HSA-165159  
R-HSA-512988  
R-HSA-2173789  
R-HSA-1433557  
R-HSA-2871796  
R-HSA-3928662  
R-HSA-69236  
R-HSA-69231  
R-HSA-1280218  
R-HSA-381426  
R-HSA-75153  
R-HSA-3928665  
R-HSA-445989  
R-HSA-983712  
R-HSA-2453902  
R-HSA-2162123  
R-HSA-197264  
R-HSA-4085001  
R-HSA-9692916  
R-HSA-3000171  
R-HSA-9664323  
R-HSA-114608  
R-HSA-418597  
R-HSA-5578775  
R-HSA-193648  
R-HSA-6805567  
R-HSA-9012999  
R-HSA-76005  
R-HSA-8873719  
R-HSA-421270  
R-HSA-9006931  
R-HSA-1442490  
R-HSA-450294  
R-HSA-8943724

E8\_severecontrol\_down\_reactome

R-HSA-375165  
R-HSA-9707616  
R-HSA-186797  
R-HSA-373755  
R-HSA-2559586  
R-HSA-1483257  
R-HSA-381119  
R-HSA-5690714  
R-HSA-936837  
R-HSA-211976  
R-HSA-168643  
R-HSA-211981  
R-HSA-913709  
R-HSA-5362517  
R-HSA-428157  
R-HSA-193368  
R-HSA-448424  
R-HSA-425366  
R-HSA-9013106  
R-HSA-3000178  
R-HSA-204998  
R-HSA-5663084  
R-HSA-1989781  
R-HSA-6796648  
R-HSA-216083  
R-HSA-416482  
R-HSA-5579029  
R-HSA-400206  
R-HSA-9018677  
R-HSA-9711123  
R-HSA-1168372  
R-HSA-211897  
R-HSA-1169410  
R-HSA-8876198  
R-HSA-446728  
R-HSA-983705  
R-HSA-420499  
R-HSA-109581  
R-HSA-2029480  
R-HSA-9662851  
R-HSA-9664433  
R-HSA-388841  
R-HSA-2682334  
R-HSA-194315  
R-HSA-983695  
R-HSA-5668541  
R-HSA-168928  
R-HSA-76002  
R-HSA-2730905  
R-HSA-170834  
R-HSA-109582  
R-HSA-422356  
R-HSA-9716542

E8\_severecontrol\_down\_reactome

R-HSA-193704  
R-HSA-166786  
R-HSA-192105  
R-HSA-2559580  
R-HSA-8856825  
R-HSA-5617472  
R-HSA-5619507  
R-HSA-418346  
R-HSA-9692914  
R-HSA-166663  
R-HSA-198933  
R-HSA-194068  
R-HSA-112314  
R-HSA-2029485  
R-HSA-2871809  
R-HSA-373760  
R-HSA-2454202  
R-HSA-446219  
R-HSA-9007101  
R-HSA-5173105  
R-HSA-9006936  
R-HSA-9675108  
R-HSA-15869  
R-HSA-5576891  
R-HSA-163685  
R-HSA-196849  
R-HSA-1474228  
R-HSA-71387  
R-HSA-8878171  
R-HSA-8980692  
R-HSA-9664417  
R-HSA-9664422  
R-HSA-9664407  
R-HSA-2029482  
R-HSA-9013148  
R-HSA-9018678  
R-HSA-446193  
R-HSA-8856828  
R-HSA-73887  
R-HSA-1266738  
R-HSA-2142753  
R-HSA-9679191  
R-HSA-2187338  
R-HSA-6807070  
R-HSA-453279  
R-HSA-9610379  
R-HSA-2871837  
R-HSA-5663202  
R-HSA-69242  
R-HSA-211945  
R-HSA-9678108  
R-HSA-2262752  
R-HSA-3781865

E8\_severecontrol\_down\_reactome

R-HSA-1474244  
R-HSA-8953897  
R-HSA-112315  
R-HSA-397014  
R-HSA-422475  
R-HSA-3700989  
R-HSA-196854  
R-HSA-9609646  
R-HSA-425407  
R-HSA-5668914  
R-HSA-983168  
R-HSA-1257604  
R-HSA-8957322  
R-HSA-112316  
R-HSA-9006925  
R-HSA-556833  
R-HSA-211859  
R-HSA-446203  
R-HSA-8978868  
R-HSA-382551  
R-HSA-69278  
R-HSA-199991  
R-HSA-1640170  
R-HSA-9679506  
R-HSA-597592  
R-HSA-5653656  
R-HSA-71291  
R-HSA-5663205  
R-HSA-8953854  
R-HSA-1643685  
R-HSA-212436  
R-HSA-73857  
R-HSA-392499  
R-HSA-74160  
R-HSA-9709957  
R-HSA-1430728

Pathway name  
Neutrophil degranulation  
Interleukin-10 signaling  
Immune System  
Innate Immune System  
Chemokine receptors bind chemokines  
Cytokine Signaling in Immune system  
Peptide ligand-binding receptors  
Signaling by Interleukins  
Class A/1 (Rhodopsin-like receptors)  
NGF-stimulated transcription  
Interleukin-4 and Interleukin-13 signaling  
Nuclear Events (kinase and transcription factor activation)  
G alpha (i) signalling events  
GPCR ligand binding  
Signaling by GPCR  
RHO GTPases Activate NADPH Oxidases  
CLEC7A/inflammasome pathway  
GPCR downstream signalling  
Cross-presentation of particulate exogenous antigens (phagosomes)  
Signaling by NTRK1 (TRKA)  
Interferon Signaling  
Interferon alpha/beta signaling  
Antimicrobial peptides  
Signal regulatory protein family interactions  
Signaling by NTRKs  
Hydroxycarboxylic acid-binding receptors  
MyD88 deficiency (TLR2/4)  
Antigen processing-Cross presentation  
IRAK4 deficiency (TLR2/4)  
Formyl peptide receptors bind formyl peptides and many other ligands  
Interleukin-1 processing  
Regulation of TLR by endogenous ligand  
Metal sequestration by antimicrobial proteins  
Diseases associated with the TLR signaling cascade  
Diseases of Immune System  
C-type lectin receptors (CLRs)  
TP53 Regulates Transcription of Death Receptors and Ligands  
ROS and RNS production in phagocytes  
Keratan sulfate/keratin metabolism  
MyD88:MAL(TIRAP) cascade initiated on plasma membrane  
Toll Like Receptor TLR6:TLR2 Cascade  
Keratan sulfate degradation  
Senescence-Associated Secretory Phenotype (SASP)  
Purinergic signaling in leishmaniasis infection  
Cell recruitment (pro-inflammatory response)  
Toll Like Receptor TLR1:TLR2 Cascade  
Toll Like Receptor 2 (TLR2) Cascade  
Defective SERPING1 causes hereditary angioedema  
Crosslinking of collagen fibrils  
Nuclear events stimulated by ALK signaling in cancer  
MPS IV - Morquio syndrome B  
TGFB1 LBD Mutants in Cancer

Interferon gamma signaling  
Estrogen-dependent nuclear events downstream of ESR-membrane signaling  
Dectin-2 family  
Detoxification of Reactive Oxygen Species  
G protein gated Potassium channels  
Inhibition of voltage gated Ca<sup>2+</sup> channels via Gbeta/gamma subunits  
Activation of G protein gated Potassium channels  
Toll Like Receptor 4 (TLR4) Cascade  
Defective CYP27A1 causes CTX  
ATF4 activates genes in response to endoplasmic reticulum stress  
Pyroptosis  
CLEC7A (Dectin-1) signaling  
Signaling by Receptor Tyrosine Kinases  
Loss of Function of TGFBR1 in Cancer  
Nectin/Necl trans heterodimerization  
Interleukin-1 signaling  
Inwardly rectifying K<sup>+</sup> channels  
G alpha (q) signalling events  
EGR2 and SOX10-mediated initiation of Schwann cell myelination  
Defective NEU1 causes sialidosis  
Formation of the Editosome  
Acyl chain remodelling of PC  
NPAS4 regulates expression of target genes  
Cell-Cell communication  
PERK regulates gene expression  
Erythropoietin activates STAT5  
Signaling by TGF-beta Receptor Complex in Cancer  
HS-GAG degradation  
TRIF-mediated programmed cell death  
Attachment of GPI anchor to uPAR  
mRNA Editing: C to U Conversion  
RAC2 GTPase cycle  
Signal Transduction  
Cellular Senescence  
Toll-like Receptor Cascades  
GABA B receptor activation  
Activation of GABAB receptors  
Calcineurin activates NFAT  
Activation of the AP-1 family of transcription factors  
Ficolins bind to repetitive carbohydrate structures on the target cell surface  
mRNA Editing  
RAC3 GTPase cycle  
Erythropoietin activates Phospholipase C gamma (PLCG)  
Establishment of Sister Chromatid Cohesion  
Ion influx/efflux at host-pathogen interface  
Apoptosis induced DNA fragmentation  
Cross-presentation of soluble exogenous antigens (endosomes)  
DAP12 interactions  
Complement cascade  
Synthesis of PC  
Dissolution of Fibrin Clot  
PECAM1 interactions  
Lectin pathway of complement activation

Anchoring fibril formation  
OAS antiviral response  
Transcriptional regulation of white adipocyte differentiation  
Erythropoietin activates Phosphoinositide-3-kinase (PI3K)  
Advanced glycosylation endproduct receptor signaling  
Platelet Adhesion to exposed collagen  
Transcriptional Regulation by NPAS4  
Formation of Senescence-Associated Heterochromatin Foci (SAHF)  
TNF receptor superfamily (TNFSF) members mediating non-canonical NF-kB pathway  
Reversible hydration of carbon dioxide  
IL-6-type cytokine receptor ligand interactions  
Post-translational modification: synthesis of GPI-anchored proteins  
Class I MHC mediated antigen processing & presentation  
TRAF6 mediated induction of NFkB and MAP kinases upon TLR7/8 or 9 activation  
MyD88 dependent cascade initiated on endosome  
CRMPs in Sema3A signaling  
Regulation of KIT signaling  
Hydrolysis of LPC  
cGMP effects  
IRAK2 mediated activation of TAK1 complex upon TLR7/8 or 9 stimulation  
Toll Like Receptor 7/8 (TLR7/8) Cascade  
Signaling by ALK fusions and activated point mutants  
Signaling by ALK in cancer  
Erythropoietin activates RAS  
TRAF6-mediated induction of TAK1 complex within TLR4 complex  
Sema3A PAK dependent Axon repulsion  
TGF-beta receptor signaling in EMT (epithelial to mesenchymal transition)  
Other semaphorin interactions  
MyD88-independent TLR4 cascade  
TRIF(TICAM1)-mediated TLR4 signaling  
Toll Like Receptor 9 (TLR9) Cascade  
Assembly of collagen fibrils and other multimeric structures  
GABA receptor activation  
Activation of IRF3/IRF7 mediated by TBK1/IKK epsilon  
SEMA3A-Plexin repulsion signaling by inhibiting Integrin adhesion  
Acetylcholine regulates insulin secretion  
Caspase activation via Death Receptors in the presence of ligand  
Interleukin-1 family signaling  
Nucleotide salvage  
Diseases of hemostasis  
Defects of contact activation system (CAS) and kallikrein/kinin system (KKS)  
Transcriptional regulation of granulopoiesis  
VEGFA-VEGFR2 Pathway  
Synthesis of 15-eicosatetraenoic acid derivatives  
Regulated Necrosis  
RAC1 GTPase cycle  
Cell surface interactions at the vascular wall  
Collagen biosynthesis and modifying enzymes  
IKK complex recruitment mediated by RIP1  
Regulation of signaling by CBL  
The NLRP3 inflammasome  
CTLA4 inhibitory signaling  
Glycogen breakdown (glycogenolysis)

Acyl chain remodelling of PI  
Formation of the cornified envelope  
Regulation of Complement cascade  
Signaling by VEGF  
Intrinsic Pathway of Fibrin Clot Formation  
Inactivation of CSF3 (G-CSF) signaling  
TP53 Regulates Transcription of Cell Death Genes  
Signaling by phosphorylated juxtamembrane, extracellular and kinase domain KIT mutants  
mTORC1-mediated signalling  
Signaling by KIT in disease  
Nicotinate metabolism  
Fatty acids  
Biosynthesis of electrophilic  $\alpha$ - $\omega$ -3 PUFA oxo-derivatives  
Free fatty acid receptors  
Growth hormone receptor signaling  
Glycosphingolipid metabolism  
Heparan sulfate/heparin (HS-GAG) metabolism  
CYP2E1 reactions  
TRAF6 mediated NF- $\kappa$ B activation  
CD209 (DC-SIGN) signaling  
Interleukin-6 family signaling  
Amyloid fiber formation  
Laminin interactions  
Biosynthesis of DPAn-3 SPMs  
Estrogen-dependent gene expression  
Urea cycle  
Caspase activation via extrinsic apoptotic signalling pathway  
Glycerophospholipid biosynthesis  
EPA-mediated growth cone collapse  
Synthesis of PE  
Biosynthesis of EPA-derived SPMs  
Metal ion SLC transporters  
Pyrimidine salvage  
Inflammasomes  
Signaling by Erythropoietin  
Signaling by CSF3 (G-CSF)  
Adherens junctions interactions  
Nitric oxide stimulates guanylate cyclase  
MAPK targets/ Nuclear events mediated by MAP kinases  
Biosynthesis of DPA-derived SPMs  
Keratan sulfate biosynthesis  
Mucopolysaccharidoses  
Synthesis of bile acids and bile salts via 27-hydroxycholesterol  
Leishmania infection  
Programmed Cell Death  
FCGR activation  
Collagen formation  
ER-Phagosome pathway  
RUNX1 regulates transcription of genes involved in differentiation of HSCs  
RA biosynthesis pathway  
Glycogen metabolism  
CD28 co-stimulation  
Potassium Channels

Acyl chain remodelling of PE  
Post-translational protein phosphorylation  
MyD88 cascade initiated on plasma membrane  
Toll Like Receptor 5 (TLR5) Cascade  
Toll Like Receptor 10 (TLR10) Cascade  
GPVI-mediated activation cascade  
Formation of Fibrin Clot (Clotting Cascade)  
Extra-nuclear estrogen signaling  
Glycosaminoglycan metabolism  
NCAM1 interactions  
Collagen chain trimerization  
RHO GTPase Effectors  
Synthesis of bile acids and bile salts via 24-hydroxycholesterol  
Purine salvage  
ESR-mediated signaling  
RHOF GTPase cycle  
Diseases associated with N-glycosylation of proteins  
Toll Like Receptor 3 (TLR3) Cascade  
Stimuli-sensing channels  
MTOR signalling  
Interleukin-3, Interleukin-5 and GM-CSF signaling  
TGF-beta receptor signaling activates SMADs  
Signaling by SCF-KIT  
FCERI mediated MAPK activation  
EPHB-mediated forward signaling  
G1 Phase  
Cyclin D associated events in G1  
Adaptive Immune System  
Regulation of Insulin-like Growth Factor (IGF) transport and uptake by Insulin-like Growth Factor Binding Proteins (IGFBP)  
Apoptotic execution phase  
EPH-ephrin mediated repulsion of cells  
TAK1-dependent IKK and NF-kappa-B activation  
Ion channel transport  
The canonical retinoid cycle in rods (twilight vision)  
Synthesis of Prostaglandins (PG) and Thromboxanes (TX)  
Nicotinamide salvaging  
Sialic acid metabolism  
SARS-CoV-1 activates/modulates innate immune responses  
Non-integrin membrane-ECM interactions  
FCGR3A-mediated IL10 synthesis  
Platelet degranulation  
G alpha (z) signalling events  
Ion homeostasis  
NRAGE signals death through JNK  
Keratinization  
RHO GTPase cycle  
Response to elevated platelet cytosolic Ca<sup>2+</sup>  
RAB geranylgeranylation  
Cell-cell junction organization  
Signaling by Nuclear Receptors  
Collagen degradation  
MAP kinase activation  
Regulation of PTEN gene transcription

NCAM signaling for neurite out-growth  
Heme signaling  
Signaling by PDGF  
Semaphorin interactions  
DNA Damage/Telomere Stress Induced Senescence  
Phospholipid metabolism  
Unfolded Protein Response (UPR)  
CD22 mediated BCR regulation  
Ion transport by P-type ATPases  
Endogenous sterols  
Nucleotide-binding domain, leucine rich repeat containing receptor (NLR) signaling pathways  
Xenobiotics  
O-linked glycosylation of mucins  
Signaling by Retinoic Acid  
Sphingolipid metabolism  
Synthesis of bile acids and bile salts via 7alpha-hydroxycholesterol  
Interleukin-17 signaling  
Transport of bile salts and organic acids, metal ions and amine compounds  
RHOC GTPase cycle  
ECM proteoglycans  
Cell death signalling via NRAGE, NRIF and NADE  
Diseases of carbohydrate metabolism  
PPARA activates gene expression  
TP53 Regulates Transcription of DNA Repair Genes  
Integrin cell surface interactions  
G alpha (12/13) signalling events  
Metabolic disorders of biological oxidation enzymes  
Regulation of lipid metabolism by PPARalpha  
Biosynthesis of DHA-derived SPMs  
Cellular response to chemical stress  
Downstream signaling events of B Cell Receptor (BCR)  
Cytochrome P450 - arranged by substrate type  
Antiviral mechanism by IFN-stimulated genes  
RAB GEFs exchange GTP for GDP on RABs  
Cell junction organization  
Signaling by the B Cell Receptor (BCR)  
Class C/3 (Metabotropic glutamate/pheromone receptors)  
Apoptosis  
Fcgamma receptor (FCGR) dependent phagocytosis  
Anti-inflammatory response favouring Leishmania parasite infection  
Leishmania parasite growth and survival  
Costimulation by the CD28 family  
EPH-Ephrin signaling  
Signaling by Rho GTPases  
Antigen activates B Cell Receptor (BCR) leading to generation of second messengers  
TNFR2 non-canonical NF-kB pathway  
DDX58/IFIH1-mediated induction of interferon-alpha/beta  
Platelet activation, signaling and aggregation  
Role of LAT2/NTAL/LAB on calcium mobilization  
Signaling by TGF-beta Receptor Complex  
Hemostasis  
Regulation of insulin secretion  
Signaling by Rho GTPases, Miro GTPases and RHOBTB3

p75 NTR receptor-mediated signalling  
Creation of C4 and C2 activators  
Synthesis of bile acids and bile salts  
Oxidative Stress Induced Senescence  
Cargo recognition for clathrin-mediated endocytosis  
Activation of anterior HOX genes in hindbrain development during early embryogenesis  
Activation of HOX genes during differentiation  
Platelet homeostasis  
SARS-CoV-1-host interactions  
Initial triggering of complement  
Immunoregulatory interactions between a Lymphoid and a non-Lymphoid cell  
Bile acid and bile salt metabolism  
Neurotransmitter receptors and postsynaptic signal transmission  
Role of phospholipids in phagocytosis  
FCERI mediated Ca<sup>2+</sup> mobilization  
L1CAM interactions  
Fc epsilon receptor (FCERI) signaling  
Synthesis of substrates in N-glycan biosynthesis  
Rab regulation of trafficking  
O-linked glycosylation  
Signaling by TGFB family members  
Nervous system development  
Metabolism of nucleotides  
Cardiac conduction  
Integration of energy metabolism  
Metabolism of water-soluble vitamins and cofactors  
Degradation of the extracellular matrix  
Metabolism of carbohydrates  
Transcriptional regulation by RUNX1  
RHOA GTPase cycle  
Leishmania phagocytosis  
FCGR3A-mediated phagocytosis  
Parasite infection  
Regulation of actin dynamics for phagocytic cup formation  
CDC42 GTPase cycle  
Biosynthesis of specialized proresolving mediators (SPMs)  
Biosynthesis of the N-glycan precursor (dolichol lipid-linked oligosaccharide, LLO) and transfer to a nascent protein  
Clathrin-mediated endocytosis  
Death Receptor Signalling  
Developmental Biology  
Arachidonic acid metabolism  
Potential therapeutics for SARS  
Visual phototransduction  
PTEN Regulation  
Mitotic G1 phase and G1/S transition  
HCMV Late Events  
FCERI mediated NF- $\kappa$ B activation  
Diseases of signal transduction by growth factor receptors and second messengers  
S Phase  
Phase I - Functionalization of compounds  
SARS-CoV-1 Infection  
Cellular responses to stress  
Diseases of glycosylation

Extracellular matrix organization  
Cellular responses to stimuli  
Transmission across Chemical Synapses  
Muscle contraction  
Axon guidance  
Transcriptional Regulation by TP53  
Metabolism of vitamins and cofactors  
HCMV Infection  
SLC-mediated transmembrane transport  
Diseases of metabolism  
Antigen processing: Ubiquitination & Proteasome degradation  
PIP3 activates AKT signaling  
Metabolism of steroids  
Neuronal System  
Intracellular signaling by second messengers  
Metabolism of lipids  
Biological oxidations  
Asparagine N-linked glycosylation  
Fatty acid metabolism  
Transport of small molecules  
Cell Cycle, Mitotic  
Membrane Trafficking  
Cell Cycle  
SARS-CoV Infections  
Post-translational protein modification  
Vesicle-mediated transport  
Metabolism of amino acids and derivatives  
Infectious disease  
Metabolism of RNA  
Disease  
Generic Transcription Pathway  
RNA Polymerase II Transcription  
Metabolism of proteins  
Gene expression (Transcription)  
Sensory Perception  
Metabolism

## E8\_severecontrol\_down\_reactome

| Entities found | Entities total | Entities ratio | Entities pValue | Entities FDR | Reactions found |
|----------------|----------------|----------------|-----------------|--------------|-----------------|
| 36             | 480            | 0.031614305    | 1.11E-16        | 1.65E-14     | 10              |
| 20             | 86             | 0.00566423     | 1.11E-16        | 1.65E-14     | 4               |
| 89             | 2698           | 0.177698742    | 1.11E-16        | 1.65E-14     | 208             |
| 52             | 1345           | 0.088585918    | 4.36E-12        | 4.89E-10     | 126             |
| 11             | 57             | 0.003754199    | 6.08E-10        | 5.41E-08     | 4               |
| 41             | 1107           | 0.072910492    | 0.00000000458   | 0.000000339  | 64              |
| 16             | 203            | 0.013370217    | 0.0000000281    | 0.0000018    | 10              |
| 28             | 658            | 0.043337944    | 0.000000115     | 0.00000644   | 33              |
| 20             | 414            | 0.027267338    | 0.00000129      | 0.0000573    | 14              |
| 8              | 56             | 0.003688336    | 0.0000013       | 0.0000573    | 27              |
| 13             | 211            | 0.013897122    | 0.00000828      | 0.000331     | 5               |
| 8              | 80             | 0.005269051    | 0.0000171       | 0.000633     | 27              |
| 18             | 426            | 0.028057696    | 0.0000265       | 0.000901     | 7               |
| 21             | 608            | 0.040044787    | 0.000102        | 0.003248812  | 15              |
| 26             | 875            | 0.057630244    | 0.00017         | 0.004929671  | 34              |
| 5              | 38             | 0.002502799    | 0.000195        | 0.005113129  | 11              |
| 3              | 8              | 0.000527       | 0.000197        | 0.005113129  | 2               |
| 23             | 794            | 0.05229533     | 0.000583        | 0.014000384  | 19              |
| 3              | 13             | 0.000856       | 0.000803        | 0.018461356  | 1               |
| 8              | 143            | 0.009418429    | 0.000864        | 0.019001316  | 27              |
| 14             | 397            | 0.026147665    | 0.001225253     | 0.025730307  | 7               |
| 9              | 190            | 0.012513996    | 0.001325644     | 0.026512883  | 2               |
| 7              | 123            | 0.008101166    | 0.001638197     | 0.031125737  | 9               |
| 3              | 18             | 0.001185536    | 0.002027009     | 0.036486155  | 10              |
| 8              | 166            | 0.010933281    | 0.002188792     | 0.037209466  | 27              |
| 2              | 7              | 0.000461       | 0.004256254     | 0.072356315  | 2               |
| 3              | 26             | 0.001712442    | 0.005642065     | 0.090273046  | 2               |
| 8              | 195            | 0.012843312    | 0.005702037     | 0.091232596  | 6               |
| 3              | 27             | 0.001778305    | 0.006256153     | 0.09384229   | 2               |
| 2              | 11             | 0.000724       | 0.010142215     | 0.141991009  | 2               |
| 2              | 12             | 0.00079        | 0.011963263     | 0.167485688  | 2               |
| 3              | 36             | 0.002371073    | 0.013568665     | 0.180909459  | 6               |
| 2              | 13             | 0.000856       | 0.013916112     | 0.180909459  | 2               |
| 3              | 42             | 0.002766252    | 0.020313595     | 0.243763136  | 4               |
| 3              | 42             | 0.002766252    | 0.020313595     | 0.243763136  | 4               |
| 7              | 203            | 0.013370217    | 0.022270319     | 0.267243828  | 15              |
| 2              | 18             | 0.001185536    | 0.025524745     | 0.293711403  | 2               |
| 4              | 82             | 0.005400777    | 0.026701037     | 0.293711403  | 2               |
| 3              | 51             | 0.00335902     | 0.033309469     | 0.320637832  | 2               |
| 5              | 133            | 0.008759797    | 0.036668542     | 0.320637832  | 19              |
| 5              | 133            | 0.008759797    | 0.036668542     | 0.320637832  | 19              |
| 2              | 22             | 0.001448989    | 0.036810218     | 0.320637832  | 1               |
| 4              | 91             | 0.005993545    | 0.036917363     | 0.320637832  | 7               |
| 3              | 54             | 0.003556609    | 0.03840312      | 0.320637832  | 4               |
| 3              | 54             | 0.003556609    | 0.03840312      | 0.320637832  | 4               |
| 5              | 136            | 0.008957387    | 0.039710347     | 0.320637832  | 19              |
| 5              | 136            | 0.008957387    | 0.039710347     | 0.320637832  | 19              |
| 1              | 3              | 0.000198       | 0.040079729     | 0.320637832  | 3               |
| 2              | 24             | 0.001580715    | 0.043045242     | 0.344361937  | 2               |
| 2              | 27             | 0.001778305    | 0.053068008     | 0.394304661  | 1               |
| 1              | 4              | 0.000263       | 0.053081132     | 0.394304661  | 2               |
| 1              | 4              | 0.000263       | 0.053081132     | 0.394304661  | 1               |

## E8\_severecontrol\_down\_reactome

|    |      |             |             |             |     |
|----|------|-------------|-------------|-------------|-----|
| 7  | 252  | 0.01659751  | 0.058866226 | 0.394304661 | 2   |
| 2  | 29   | 0.001910031 | 0.060162399 | 0.394304661 | 2   |
| 3  | 65   | 0.004281104 | 0.060214676 | 0.394304661 | 8   |
| 3  | 68   | 0.004478693 | 0.066980646 | 0.394304661 | 1   |
| 2  | 31   | 0.002041757 | 0.067560716 | 0.394304661 | 3   |
| 2  | 31   | 0.002041757 | 0.067560716 | 0.394304661 | 3   |
| 2  | 31   | 0.002041757 | 0.067560716 | 0.394304661 | 3   |
| 5  | 165  | 0.010867418 | 0.076886387 | 0.394304661 | 43  |
| 1  | 6    | 0.000395    | 0.078560523 | 0.394304661 | 2   |
| 2  | 34   | 0.002239347 | 0.079181693 | 0.394304661 | 1   |
| 2  | 34   | 0.002239347 | 0.079181693 | 0.394304661 | 1   |
| 4  | 120  | 0.007903576 | 0.083087978 | 0.394304661 | 6   |
| 13 | 621  | 0.040901008 | 0.084515351 | 0.394304661 | 49  |
| 1  | 7    | 0.000461    | 0.091043182 | 0.394304661 | 1   |
| 1  | 7    | 0.000461    | 0.091043182 | 0.394304661 | 1   |
| 4  | 125  | 0.008232892 | 0.093014277 | 0.394304661 | 16  |
| 2  | 38   | 0.002502799 | 0.095548794 | 0.394304661 | 3   |
| 7  | 284  | 0.018705131 | 0.095802332 | 0.394304661 | 7   |
| 2  | 39   | 0.002568662 | 0.09978064  | 0.394304661 | 19  |
| 1  | 8    | 0.000527    | 0.103357546 | 0.394304661 | 1   |
| 1  | 8    | 0.000527    | 0.103357546 | 0.394304661 | 1   |
| 2  | 40   | 0.002634525 | 0.104064031 | 0.394304661 | 3   |
| 2  | 41   | 0.002700389 | 0.108396811 | 0.394304661 | 2   |
| 4  | 134  | 0.00882566  | 0.112217952 | 0.394304661 | 14  |
| 2  | 42   | 0.002766252 | 0.112776873 | 0.394304661 | 1   |
| 1  | 9    | 0.000593    | 0.115505872 | 0.394304661 | 3   |
| 1  | 9    | 0.000593    | 0.115505872 | 0.394304661 | 1   |
| 2  | 44   | 0.002897978 | 0.121670656 | 0.394304661 | 1   |
| 1  | 10   | 0.000659    | 0.127490389 | 0.394304661 | 3   |
| 1  | 10   | 0.000659    | 0.127490389 | 0.394304661 | 2   |
| 1  | 10   | 0.000659    | 0.127490389 | 0.394304661 | 2   |
| 3  | 92   | 0.006059409 | 0.131985284 | 0.394304661 | 1   |
| 48 | 3023 | 0.199104261 | 0.13757111  | 0.394304661 | 142 |
| 5  | 200  | 0.013172627 | 0.1398181   | 0.394304661 | 12  |
| 5  | 202  | 0.013304354 | 0.143952314 | 0.394304661 | 49  |
| 2  | 50   | 0.003293157 | 0.14928202  | 0.394304661 | 4   |
| 2  | 50   | 0.003293157 | 0.14928202  | 0.394304661 | 3   |
| 1  | 12   | 0.00079     | 0.150976758 | 0.394304661 | 2   |
| 1  | 12   | 0.00079     | 0.150976758 | 0.394304661 | 2   |
| 1  | 12   | 0.00079     | 0.150976758 | 0.394304661 | 1   |
| 1  | 12   | 0.00079     | 0.150976758 | 0.394304661 | 2   |
| 3  | 100  | 0.006586314 | 0.157218437 | 0.394304661 | 1   |
| 1  | 13   | 0.000856    | 0.162482919 | 0.394304661 | 3   |
| 1  | 13   | 0.000856    | 0.162482919 | 0.394304661 | 2   |
| 1  | 13   | 0.000856    | 0.162482919 | 0.394304661 | 1   |
| 1  | 13   | 0.000856    | 0.162482919 | 0.394304661 | 2   |
| 2  | 53   | 0.003490746 | 0.163521525 | 0.394304661 | 4   |
| 2  | 53   | 0.003490746 | 0.163521525 | 0.394304661 | 2   |
| 4  | 156  | 0.010274649 | 0.165595455 | 0.394304661 | 9   |
| 2  | 55   | 0.003622473 | 0.173144567 | 0.394304661 | 2   |
| 1  | 14   | 0.000922    | 0.173833889 | 0.394304661 | 6   |
| 1  | 14   | 0.000922    | 0.173833889 | 0.394304661 | 1   |
| 1  | 15   | 0.000988    | 0.185031751 | 0.394304661 | 2   |

## E8\_severecontrol\_down\_reactome

|   |     |             |             |             |    |
|---|-----|-------------|-------------|-------------|----|
| 1 | 15  | 0.000988    | 0.185031751 | 0.394304661 | 1  |
| 1 | 15  | 0.000988    | 0.185031751 | 0.394304661 | 3  |
| 3 | 109 | 0.007179082 | 0.187199842 | 0.394304661 | 5  |
| 1 | 16  | 0.00105381  | 0.196078561 | 0.394304661 | 7  |
| 1 | 16  | 0.00105381  | 0.196078561 | 0.394304661 | 2  |
| 1 | 16  | 0.00105381  | 0.196078561 | 0.394304661 | 2  |
| 2 | 60  | 0.003951788 | 0.197568744 | 0.394304661 | 2  |
| 1 | 17  | 0.001119673 | 0.206976345 | 0.394304661 | 1  |
| 1 | 17  | 0.001119673 | 0.206976345 | 0.394304661 | 3  |
| 1 | 17  | 0.001119673 | 0.206976345 | 0.394304661 | 2  |
| 1 | 17  | 0.001119673 | 0.206976345 | 0.394304661 | 2  |
| 3 | 115 | 0.007574261 | 0.207949796 | 0.394304661 | 3  |
| 9 | 479 | 0.031548442 | 0.209219421 | 0.394304661 | 10 |
| 3 | 116 | 0.007640124 | 0.211458172 | 0.394304661 | 4  |
| 3 | 117 | 0.007705987 | 0.214979561 | 0.394304661 | 4  |
| 1 | 18  | 0.001185536 | 0.217727106 | 0.394304661 | 5  |
| 1 | 18  | 0.001185536 | 0.217727106 | 0.394304661 | 3  |
| 1 | 18  | 0.001185536 | 0.217727106 | 0.394304661 | 2  |
| 1 | 18  | 0.001185536 | 0.217727106 | 0.394304661 | 1  |
| 1 | 18  | 0.001185536 | 0.217727106 | 0.394304661 | 1  |
| 3 | 118 | 0.00777185  | 0.218513486 | 0.394304661 | 4  |
| 2 | 66  | 0.004346967 | 0.227372    | 0.394304661 | 1  |
| 2 | 66  | 0.004346967 | 0.227372    | 0.394304661 | 1  |
| 1 | 19  | 0.0012514   | 0.228332817 | 0.394304661 | 8  |
| 1 | 19  | 0.0012514   | 0.228332817 | 0.394304661 | 6  |
| 1 | 19  | 0.0012514   | 0.228332817 | 0.394304661 | 3  |
| 1 | 19  | 0.0012514   | 0.228332817 | 0.394304661 | 2  |
| 1 | 19  | 0.0012514   | 0.228332817 | 0.394304661 | 1  |
| 3 | 121 | 0.00796944  | 0.229185775 | 0.394304661 | 24 |
| 3 | 121 | 0.00796944  | 0.229185775 | 0.394304661 | 22 |
| 3 | 121 | 0.00796944  | 0.229185775 | 0.394304661 | 4  |
| 2 | 67  | 0.00441283  | 0.232373952 | 0.394304661 | 4  |
| 2 | 68  | 0.004478693 | 0.237382732 | 0.394304661 | 4  |
| 1 | 20  | 0.001317263 | 0.238795425 | 0.394304661 | 7  |
| 1 | 20  | 0.001317263 | 0.238795425 | 0.394304661 | 6  |
| 1 | 20  | 0.001317263 | 0.238795425 | 0.394304661 | 1  |
| 1 | 20  | 0.001317263 | 0.238795425 | 0.394304661 | 1  |
| 4 | 183 | 0.012052954 | 0.240688395 | 0.394304661 | 18 |
| 2 | 69  | 0.004544556 | 0.242397244 | 0.394304661 | 2  |
| 1 | 21  | 0.001383126 | 0.249116853 | 0.394304661 | 3  |
| 1 | 21  | 0.001383126 | 0.249116853 | 0.394304661 | 3  |
| 2 | 71  | 0.004676283 | 0.252439218 | 0.394304661 | 7  |
| 3 | 129 | 0.008496345 | 0.258081614 | 0.394304661 | 2  |
| 1 | 22  | 0.001448989 | 0.259298996 | 0.394304661 | 1  |
| 2 | 73  | 0.004808009 | 0.262491662 | 0.394304661 | 1  |
| 4 | 191 | 0.012579859 | 0.264324893 | 0.394304661 | 2  |
| 5 | 257 | 0.016926826 | 0.274474086 | 0.394304661 | 5  |
| 2 | 76  | 0.005005598 | 0.277573024 | 0.394304661 | 20 |
| 1 | 24  | 0.001580715 | 0.279252885 | 0.394304661 | 3  |
| 1 | 24  | 0.001580715 | 0.279252885 | 0.394304661 | 3  |
| 1 | 24  | 0.001580715 | 0.279252885 | 0.394304661 | 2  |
| 1 | 25  | 0.001646578 | 0.289028298 | 0.394304661 | 2  |
| 1 | 25  | 0.001646578 | 0.289028298 | 0.394304661 | 3  |

E8\_severecontrol\_down\_reactome

|   |     |             |             |             |    |
|---|-----|-------------|-------------|-------------|----|
| 1 | 25  | 0.001646578 | 0.289028298 | 0.394304661 | 1  |
| 3 | 138 | 0.009089113 | 0.291125006 | 0.394304661 | 8  |
| 3 | 139 | 0.009154976 | 0.294819035 | 0.394304661 | 5  |
| 3 | 140 | 0.009220839 | 0.298516125 | 0.394304661 | 2  |
| 1 | 26  | 0.001712442 | 0.29867176  | 0.394304661 | 3  |
| 1 | 27  | 0.001778305 | 0.308185043 | 0.394304661 | 5  |
| 2 | 83  | 0.00546664  | 0.31265216  | 0.394304661 | 2  |
| 1 | 28  | 0.001844168 | 0.317569897 | 0.394304661 | 7  |
| 1 | 28  | 0.001844168 | 0.317569897 | 0.394304661 | 3  |
| 1 | 28  | 0.001844168 | 0.317569897 | 0.394304661 | 7  |
| 2 | 84  | 0.005532503 | 0.317639007 | 0.394304661 | 2  |
| 1 | 29  | 0.001910031 | 0.326828047 | 0.394304661 | 1  |
| 1 | 29  | 0.001910031 | 0.326828047 | 0.394304661 | 4  |
| 1 | 29  | 0.001910031 | 0.326828047 | 0.394304661 | 1  |
| 1 | 29  | 0.001910031 | 0.326828047 | 0.394304661 | 2  |
| 2 | 86  | 0.00566423  | 0.327587021 | 0.394304661 | 3  |
| 2 | 87  | 0.005730093 | 0.332546835 | 0.394304661 | 1  |
| 1 | 30  | 0.001975894 | 0.335961195 | 0.394304661 | 6  |
| 1 | 30  | 0.001975894 | 0.335961195 | 0.394304661 | 1  |
| 1 | 30  | 0.001975894 | 0.335961195 | 0.394304661 | 1  |
| 1 | 30  | 0.001975894 | 0.335961195 | 0.394304661 | 2  |
| 2 | 89  | 0.005861819 | 0.34243484  | 0.394304661 | 2  |
| 1 | 31  | 0.002041757 | 0.344971022 | 0.394304661 | 3  |
| 1 | 31  | 0.002041757 | 0.344971022 | 0.394304661 | 1  |
| 3 | 154 | 0.010142923 | 0.350391791 | 0.394304661 | 5  |
| 1 | 32  | 0.00210762  | 0.353859183 | 0.394304661 | 1  |
| 1 | 32  | 0.00210762  | 0.353859183 | 0.394304661 | 1  |
| 4 | 221 | 0.014555753 | 0.355707292 | 0.394304661 | 10 |
| 1 | 33  | 0.002173484 | 0.362627315 | 0.394304661 | 3  |
| 1 | 33  | 0.002173484 | 0.362627315 | 0.394304661 | 1  |
| 1 | 33  | 0.002173484 | 0.362627315 | 0.394304661 | 1  |
| 1 | 33  | 0.002173484 | 0.362627315 | 0.394304661 | 1  |
| 1 | 34  | 0.002239347 | 0.37127703  | 0.394304661 | 1  |
| 1 | 34  | 0.002239347 | 0.37127703  | 0.394304661 | 2  |
| 1 | 35  | 0.00230521  | 0.379809921 | 0.394304661 | 25 |
| 1 | 35  | 0.00230521  | 0.379809921 | 0.394304661 | 15 |
| 1 | 35  | 0.00230521  | 0.379809921 | 0.394304661 | 4  |
| 1 | 35  | 0.00230521  | 0.379809921 | 0.394304661 | 1  |
| 1 | 35  | 0.00230521  | 0.379809921 | 0.394304661 | 2  |
| 1 | 35  | 0.00230521  | 0.379809921 | 0.394304661 | 1  |
| 1 | 36  | 0.002371073 | 0.388227556 | 0.394304661 | 1  |
| 1 | 36  | 0.002371073 | 0.388227556 | 0.394304661 | 2  |
| 1 | 36  | 0.002371073 | 0.388227556 | 0.394304661 | 1  |
| 5 | 302 | 0.019890667 | 0.394304661 | 0.394304661 | 7  |
| 4 | 234 | 0.015411974 | 0.395641677 | 0.395641677 | 4  |
| 2 | 103 | 0.006783903 | 0.410113957 | 0.410113957 | 4  |
| 2 | 104 | 0.006849766 | 0.414824576 | 0.414824576 | 24 |
| 3 | 173 | 0.011394323 | 0.419984345 | 0.419984345 | 1  |
| 2 | 106 | 0.006981492 | 0.42418933  | 0.42418933  | 3  |
| 1 | 41  | 0.002700389 | 0.428640421 | 0.428640421 | 1  |
| 1 | 41  | 0.002700389 | 0.428640421 | 0.428640421 | 3  |
| 1 | 41  | 0.002700389 | 0.428640421 | 0.428640421 | 1  |
| 2 | 107 | 0.007047356 | 0.428842762 | 0.428842762 | 3  |

## E8\_severecontrol\_down\_reactome

|    |      |             |             |             |    |
|----|------|-------------|-------------|-------------|----|
| 1  | 42   | 0.002766252 | 0.436398349 | 0.436398349 | 1  |
| 2  | 109  | 0.007179082 | 0.438090077 | 0.438090077 | 1  |
| 2  | 109  | 0.007179082 | 0.438090077 | 0.438090077 | 3  |
| 2  | 109  | 0.007179082 | 0.438090077 | 0.438090077 | 3  |
| 2  | 109  | 0.007179082 | 0.438090077 | 0.438090077 | 3  |
| 1  | 43   | 0.002832115 | 0.444051441 | 0.444051441 | 5  |
| 1  | 43   | 0.002832115 | 0.444051441 | 0.444051441 | 3  |
| 2  | 111  | 0.007310808 | 0.44725592  | 0.44725592  | 2  |
| 3  | 181  | 0.011921228 | 0.448596838 | 0.448596838 | 3  |
| 1  | 44   | 0.002897978 | 0.451601108 | 0.451601108 | 1  |
| 1  | 44   | 0.002897978 | 0.451601108 | 0.451601108 | 1  |
| 5  | 326  | 0.021471382 | 0.458264224 | 0.458264224 | 11 |
| 1  | 45   | 0.002963841 | 0.45904874  | 0.45904874  | 6  |
| 1  | 45   | 0.002963841 | 0.45904874  | 0.45904874  | 1  |
| 4  | 257  | 0.016926826 | 0.465125076 | 0.465125076 | 7  |
| 1  | 46   | 0.003029704 | 0.466395711 | 0.466395711 | 1  |
| 1  | 46   | 0.003029704 | 0.466395711 | 0.466395711 | 1  |
| 2  | 116  | 0.007640124 | 0.469799326 | 0.469799326 | 3  |
| 2  | 120  | 0.007903576 | 0.487436031 | 0.487436031 | 2  |
| 1  | 50   | 0.003293157 | 0.494803783 | 0.494803783 | 3  |
| 1  | 50   | 0.003293157 | 0.494803783 | 0.494803783 | 3  |
| 1  | 50   | 0.003293157 | 0.494803783 | 0.494803783 | 1  |
| 1  | 51   | 0.00335902  | 0.501667396 | 0.501667396 | 19 |
| 2  | 124  | 0.008167029 | 0.504704561 | 0.504704561 | 4  |
| 1  | 52   | 0.003424883 | 0.508438203 | 0.508438203 | 5  |
| 1  | 52   | 0.003424883 | 0.508438203 | 0.508438203 | 1  |
| 1  | 52   | 0.003424883 | 0.508438203 | 0.508438203 | 1  |
| 14 | 1012 | 0.066653494 | 0.516880125 | 0.516880125 | 21 |
| 2  | 127  | 0.008364618 | 0.517407799 | 0.517407799 | 1  |
| 1  | 54   | 0.003556609 | 0.521706382 | 0.521706382 | 2  |
| 1  | 55   | 0.003622473 | 0.528206201 | 0.528206201 | 5  |
| 1  | 55   | 0.003622473 | 0.528206201 | 0.528206201 | 1  |
| 3  | 208  | 0.013699532 | 0.540397342 | 0.540397342 | 3  |
| 1  | 57   | 0.003754199 | 0.540943296 | 0.540943296 | 1  |
| 1  | 58   | 0.003820062 | 0.547182922 | 0.547182922 | 4  |
| 1  | 59   | 0.003885925 | 0.553338141 | 0.553338141 | 1  |
| 1  | 60   | 0.003951788 | 0.55941009  | 0.55941009  | 2  |
| 1  | 60   | 0.003951788 | 0.55941009  | 0.55941009  | 1  |
| 1  | 61   | 0.004017651 | 0.56539989  | 0.56539989  | 1  |
| 2  | 141  | 0.009286702 | 0.573777919 | 0.573777919 | 3  |
| 2  | 141  | 0.009286702 | 0.573777919 | 0.573777919 | 1  |
| 1  | 63   | 0.004149378 | 0.577137453 | 0.577137453 | 4  |
| 1  | 64   | 0.004215241 | 0.582887383 | 0.582887383 | 3  |
| 1  | 64   | 0.004215241 | 0.582887383 | 0.582887383 | 1  |
| 3  | 226  | 0.014885069 | 0.596523148 | 0.596523148 | 15 |
| 6  | 460  | 0.030297043 | 0.599879192 | 0.599879192 | 8  |
| 2  | 148  | 0.009747744 | 0.600123343 | 0.600123343 | 1  |
| 1  | 68   | 0.004478693 | 0.605119386 | 0.605119386 | 2  |
| 1  | 68   | 0.004478693 | 0.605119386 | 0.605119386 | 4  |
| 5  | 387  | 0.025489034 | 0.609292886 | 0.609292886 | 8  |
| 1  | 69   | 0.004544556 | 0.610490592 | 0.610490592 | 3  |
| 1  | 69   | 0.004544556 | 0.610490592 | 0.610490592 | 2  |
| 1  | 70   | 0.00461042  | 0.615789087 | 0.615789087 | 2  |

## E8\_severecontrol\_down\_reactome

|   |     |             |             |             |    |
|---|-----|-------------|-------------|-------------|----|
| 1 | 70  | 0.00461042  | 0.615789087 | 0.615789087 | 1  |
| 1 | 70  | 0.00461042  | 0.615789087 | 0.615789087 | 1  |
| 1 | 70  | 0.00461042  | 0.615789087 | 0.615789087 | 1  |
| 1 | 71  | 0.004676283 | 0.62101585  | 0.62101585  | 15 |
| 1 | 71  | 0.004676283 | 0.62101585  | 0.62101585  | 1  |
| 4 | 314 | 0.020681025 | 0.621837369 | 0.621837369 | 10 |
| 2 | 155 | 0.010208786 | 0.625231046 | 0.625231046 | 1  |
| 1 | 72  | 0.004742146 | 0.626171847 | 0.626171847 | 1  |
| 1 | 72  | 0.004742146 | 0.626171847 | 0.626171847 | 1  |
| 1 | 72  | 0.004742146 | 0.626171847 | 0.626171847 | 1  |
| 1 | 72  | 0.004742146 | 0.626171847 | 0.626171847 | 2  |
| 1 | 73  | 0.004808009 | 0.631258033 | 0.631258033 | 13 |
| 1 | 73  | 0.004808009 | 0.631258033 | 0.631258033 | 1  |
| 1 | 73  | 0.004808009 | 0.631258033 | 0.631258033 | 1  |
| 2 | 158 | 0.010406376 | 0.635613732 | 0.635613732 | 3  |
| 1 | 78  | 0.005137325 | 0.655674268 | 0.655674268 | 6  |
| 1 | 78  | 0.005137325 | 0.655674268 | 0.655674268 | 2  |
| 2 | 165 | 0.010867418 | 0.658965941 | 0.658965941 | 2  |
| 1 | 79  | 0.005203188 | 0.660360901 | 0.660360901 | 1  |
| 1 | 79  | 0.005203188 | 0.660360901 | 0.660360901 | 1  |
| 1 | 81  | 0.005334914 | 0.669544566 | 0.669544566 | 1  |
| 1 | 81  | 0.005334914 | 0.669544566 | 0.669544566 | 2  |
| 2 | 175 | 0.011526049 | 0.690237122 | 0.690237122 | 1  |
| 1 | 86  | 0.00566423  | 0.69143686  | 0.69143686  | 2  |
| 1 | 86  | 0.00566423  | 0.69143686  | 0.69143686  | 4  |
| 1 | 86  | 0.00566423  | 0.69143686  | 0.69143686  | 1  |
| 1 | 87  | 0.005730093 | 0.695638937 | 0.695638937 | 2  |
| 2 | 177 | 0.011657775 | 0.696202072 | 0.696202072 | 1  |
| 1 | 89  | 0.005861819 | 0.703873004 | 0.703873004 | 1  |
| 3 | 269 | 0.017717184 | 0.711576831 | 0.711576831 | 1  |
| 1 | 91  | 0.005993545 | 0.711885357 | 0.711885357 | 2  |
| 2 | 186 | 0.012250543 | 0.721882218 | 0.721882218 | 15 |
| 1 | 94  | 0.006191135 | 0.723501126 | 0.723501126 | 3  |
| 1 | 94  | 0.006191135 | 0.723501126 | 0.723501126 | 1  |
| 1 | 95  | 0.006256998 | 0.727268528 | 0.727268528 | 4  |
| 2 | 189 | 0.012448133 | 0.730028136 | 0.730028136 | 5  |
| 1 | 97  | 0.006388724 | 0.734650759 | 0.734650759 | 1  |
| 2 | 192 | 0.012645722 | 0.737971802 | 0.737971802 | 3  |
| 2 | 193 | 0.012711585 | 0.740575268 | 0.740575268 | 15 |
| 2 | 193 | 0.012711585 | 0.740575268 | 0.740575268 | 3  |
| 2 | 193 | 0.012711585 | 0.740575268 | 0.740575268 | 3  |
| 1 | 99  | 0.006520451 | 0.741834109 | 0.741834109 | 3  |
| 1 | 102 | 0.00671804  | 0.752247857 | 0.752247857 | 14 |
| 8 | 709 | 0.046696964 | 0.754524916 | 0.754524916 | 19 |
| 1 | 103 | 0.006783903 | 0.755625353 | 0.755625353 | 2  |
| 1 | 104 | 0.006849766 | 0.758957024 | 0.758957024 | 7  |
| 1 | 104 | 0.006849766 | 0.758957024 | 0.758957024 | 1  |
| 3 | 293 | 0.019297899 | 0.763964572 | 0.763964572 | 6  |
| 1 | 107 | 0.007047356 | 0.768683237 | 0.768683237 | 2  |
| 1 | 107 | 0.007047356 | 0.768683237 | 0.768683237 | 3  |
| 9 | 803 | 0.052888099 | 0.770557086 | 0.770557086 | 22 |
| 1 | 108 | 0.007113219 | 0.771837715 | 0.771837715 | 1  |
| 8 | 725 | 0.047750774 | 0.775754775 | 0.775754775 | 19 |

## E8\_severecontrol\_down\_reactome

|    |      |             |             |             |    |
|----|------|-------------|-------------|-------------|----|
| 1  | 110  | 0.007244945 | 0.778018811 | 0.778018811 | 1  |
| 1  | 111  | 0.007310808 | 0.781046578 | 0.781046578 | 2  |
| 1  | 113  | 0.007442534 | 0.786979363 | 0.786979363 | 13 |
| 1  | 114  | 0.007508398 | 0.789885485 | 0.789885485 | 4  |
| 1  | 115  | 0.007574261 | 0.792752148 | 0.792752148 | 1  |
| 1  | 116  | 0.007640124 | 0.795579888 | 0.795579888 | 7  |
| 1  | 116  | 0.007640124 | 0.795579888 | 0.795579888 | 7  |
| 1  | 118  | 0.00777185  | 0.80112069  | 0.80112069  | 1  |
| 1  | 118  | 0.00777185  | 0.80112069  | 0.80112069  | 1  |
| 1  | 120  | 0.007903576 | 0.806512015 | 0.806512015 | 4  |
| 3  | 316  | 0.020812751 | 0.806699331 | 0.806699331 | 3  |
| 1  | 125  | 0.008232892 | 0.819362439 | 0.819362439 | 13 |
| 2  | 232  | 0.015280248 | 0.826133315 | 0.826133315 | 4  |
| 1  | 129  | 0.008496345 | 0.829028323 | 0.829028323 | 5  |
| 1  | 129  | 0.008496345 | 0.829028323 | 0.829028323 | 2  |
| 1  | 130  | 0.008562208 | 0.831363256 | 0.831363256 | 1  |
| 2  | 235  | 0.015477837 | 0.831537154 | 0.831537154 | 14 |
| 1  | 131  | 0.008628071 | 0.833666454 | 0.833666454 | 2  |
| 1  | 131  | 0.008628071 | 0.833666454 | 0.833666454 | 1  |
| 1  | 133  | 0.008759797 | 0.838179352 | 0.838179352 | 1  |
| 1  | 136  | 0.008957387 | 0.844721227 | 0.844721227 | 3  |
| 6  | 621  | 0.040901008 | 0.853347377 | 0.853347377 | 50 |
| 2  | 256  | 0.016860963 | 0.865317399 | 0.865317399 | 2  |
| 1  | 147  | 0.009681881 | 0.866534789 | 0.866534789 | 3  |
| 1  | 147  | 0.009681881 | 0.866534789 | 0.866534789 | 1  |
| 2  | 258  | 0.016992689 | 0.868189434 | 0.868189434 | 2  |
| 1  | 148  | 0.009747744 | 0.868359669 | 0.868359669 | 3  |
| 4  | 456  | 0.03003359  | 0.87102262  | 0.87102262  | 6  |
| 2  | 261  | 0.017190279 | 0.872392627 | 0.872392627 | 3  |
| 1  | 154  | 0.010142923 | 0.878799076 | 0.878799076 | 1  |
| 1  | 157  | 0.010340512 | 0.883705536 | 0.883705536 | 2  |
| 1  | 157  | 0.010340512 | 0.883705536 | 0.883705536 | 2  |
| 1  | 157  | 0.010340512 | 0.883705536 | 0.883705536 | 2  |
| 1  | 158  | 0.010406376 | 0.88529669  | 0.88529669  | 6  |
| 1  | 159  | 0.010472239 | 0.886866178 | 0.886866178 | 1  |
| 1  | 159  | 0.010472239 | 0.886866178 | 0.886866178 | 7  |
| 1  | 159  | 0.010472239 | 0.886866178 | 0.886866178 | 2  |
| 1  | 161  | 0.010603965 | 0.889941324 | 0.889941324 | 16 |
| 1  | 164  | 0.010801554 | 0.894398757 | 0.894398757 | 1  |
| 13 | 1279 | 0.084238951 | 0.895959989 | 0.895959989 | 84 |
| 1  | 168  | 0.011065007 | 0.900063735 | 0.900063735 | 5  |
| 1  | 168  | 0.011065007 | 0.900063735 | 0.900063735 | 2  |
| 1  | 169  | 0.01113087  | 0.90143207  | 0.90143207  | 1  |
| 1  | 171  | 0.011262596 | 0.904113054 | 0.904113054 | 2  |
| 1  | 174  | 0.011460186 | 0.907999058 | 0.907999058 | 1  |
| 1  | 175  | 0.011526049 | 0.909259242 | 0.909259242 | 2  |
| 1  | 175  | 0.011526049 | 0.909259242 | 0.909259242 | 1  |
| 4  | 498  | 0.032799842 | 0.910250669 | 0.910250669 | 9  |
| 1  | 179  | 0.011789501 | 0.9141305   | 0.9141305   | 2  |
| 2  | 301  | 0.019824804 | 0.917820838 | 0.917820838 | 15 |
| 1  | 194  | 0.012777448 | 0.930189783 | 0.930189783 | 1  |
| 9  | 1005 | 0.066192452 | 0.934827346 | 0.934827346 | 15 |
| 1  | 202  | 0.013304354 | 0.937493543 | 0.937493543 | 1  |

## E8\_severecontrol\_down\_reactome

|    |      |             |             |             |    |
|----|------|-------------|-------------|-------------|----|
| 2  | 328  | 0.021603109 | 0.939393547 | 0.939393547 | 37 |
| 9  | 1023 | 0.067377989 | 0.942581054 | 0.942581054 | 15 |
| 2  | 344  | 0.022656919 | 0.949525856 | 0.949525856 | 4  |
| 1  | 232  | 0.015280248 | 0.958722202 | 0.958722202 | 3  |
| 4  | 585  | 0.038529935 | 0.95969433  | 0.95969433  | 31 |
| 3  | 484  | 0.031877758 | 0.962158696 | 0.962158696 | 4  |
| 2  | 382  | 0.025159718 | 0.967529687 | 0.967529687 | 2  |
| 1  | 270  | 0.017783047 | 0.97562542  | 0.97562542  | 2  |
| 2  | 420  | 0.027662517 | 0.97928505  | 0.97928505  | 2  |
| 2  | 424  | 0.02792597  | 0.980251012 | 0.980251012 | 5  |
| 1  | 315  | 0.020746888 | 0.986960624 | 0.986960624 | 4  |
| 1  | 321  | 0.021142067 | 0.988005818 | 0.988005818 | 2  |
| 1  | 331  | 0.021800698 | 0.989565752 | 0.989565752 | 13 |
| 2  | 490  | 0.032272937 | 0.991115044 | 0.991115044 | 4  |
| 1  | 368  | 0.024237634 | 0.993773827 | 0.993773827 | 2  |
| 10 | 1446 | 0.095238095 | 0.995711745 | 0.995711745 | 39 |
| 2  | 551  | 0.036290588 | 0.995820922 | 0.995820922 | 15 |
| 1  | 421  | 0.02772838  | 0.997034929 | 0.997034929 | 2  |
| 1  | 431  | 0.028387012 | 0.997422993 | 0.997422993 | 5  |
| 5  | 971  | 0.063953105 | 0.997483998 | 0.997483998 | 5  |
| 2  | 596  | 0.039254429 | 0.997624686 | 0.997624686 | 3  |
| 2  | 668  | 0.043996575 | 0.999050737 | 0.999050737 | 17 |
| 2  | 734  | 0.048343542 | 0.999595719 | 0.999595719 | 3  |
| 1  | 639  | 0.042086544 | 0.999863687 | 0.999863687 | 3  |
| 8  | 1604 | 0.105644471 | 0.999880881 | 0.999880881 | 9  |
| 2  | 828  | 0.054534677 | 0.999882356 | 0.999882356 | 17 |
| 1  | 666  | 0.043864849 | 0.999907212 | 0.999907212 | 1  |
| 7  | 1512 | 0.099585062 | 0.999907498 | 0.999907498 | 12 |
| 1  | 789  | 0.051966015 | 0.999984058 | 0.999984058 | 2  |
| 15 | 2596 | 0.170980702 | 0.99998975  | 0.99998975  | 33 |
| 6  | 1588 | 0.104590661 | 0.999990392 | 0.999990392 | 9  |
| 6  | 1730 | 0.113943226 | 0.99999827  | 0.99999827  | 9  |
| 9  | 2214 | 0.145820984 | 0.99999954  | 0.99999954  | 11 |
| 6  | 1893 | 0.124678917 | 0.999999773 | 0.999999773 | 9  |
| 1  | 1262 | 0.083119278 | 0.999999984 | 0.999999984 | 1  |
| 19 | 3641 | 0.23980768  | 0.999999989 | 0.999999989 | 66 |

## E8\_severecontrol\_down\_reactome

| Reactions total | Reactions ratio | Species identifier | Species name |
|-----------------|-----------------|--------------------|--------------|
| 10              | 0.00071         | 9606               | Homo sapiens |
| 15              | 0.001065492     | 9606               | Homo sapiens |
| 1645            | 0.116848984     | 9606               | Homo sapiens |
| 725             | 0.051498792     | 9606               | Homo sapiens |
| 19              | 0.001349624     | 9606               | Homo sapiens |
| 726             | 0.051569825     | 9606               | Homo sapiens |
| 83              | 0.005895724     | 9606               | Homo sapiens |
| 505             | 0.035871573     | 9606               | Homo sapiens |
| 185             | 0.013141071     | 9606               | Homo sapiens |
| 37              | 0.002628214     | 9606               | Homo sapiens |
| 47              | 0.003338542     | 9606               | Homo sapiens |
| 48              | 0.003409575     | 9606               | Homo sapiens |
| 74              | 0.005256428     | 9606               | Homo sapiens |
| 217             | 0.015414121     | 9606               | Homo sapiens |
| 392             | 0.027844864     | 9606               | Homo sapiens |
| 14              | 0.000994        | 9606               | Homo sapiens |
| 4               | 0.000284        | 9606               | Homo sapiens |
| 175             | 0.012430743     | 9606               | Homo sapiens |
| 3               | 0.000213        | 9606               | Homo sapiens |
| 102             | 0.007245347     | 9606               | Homo sapiens |
| 74              | 0.005256428     | 9606               | Homo sapiens |
| 25              | 0.00177582      | 9606               | Homo sapiens |
| 58              | 0.004119903     | 9606               | Homo sapiens |
| 10              | 0.00071         | 9606               | Homo sapiens |
| 164             | 0.011649382     | 9606               | Homo sapiens |
| 3               | 0.000213        | 9606               | Homo sapiens |
| 2               | 0.000142        | 9606               | Homo sapiens |
| 23              | 0.001633755     | 9606               | Homo sapiens |
| 2               | 0.000142        | 9606               | Homo sapiens |
| 3               | 0.000213        | 9606               | Homo sapiens |
| 5               | 0.000355        | 9606               | Homo sapiens |
| 12              | 0.000852        | 9606               | Homo sapiens |
| 5               | 0.000355        | 9606               | Homo sapiens |
| 15              | 0.001065492     | 9606               | Homo sapiens |
| 15              | 0.001065492     | 9606               | Homo sapiens |
| 68              | 0.004830232     | 9606               | Homo sapiens |
| 7               | 0.000497        | 9606               | Homo sapiens |
| 45              | 0.003196477     | 9606               | Homo sapiens |
| 16              | 0.001136525     | 9606               | Homo sapiens |
| 76              | 0.005398494     | 9606               | Homo sapiens |
| 78              | 0.00554056      | 9606               | Homo sapiens |
| 7               | 0.000497        | 9606               | Homo sapiens |
| 22              | 0.001562722     | 9606               | Homo sapiens |
| 23              | 0.001633755     | 9606               | Homo sapiens |
| 23              | 0.001633755     | 9606               | Homo sapiens |
| 78              | 0.00554056      | 9606               | Homo sapiens |
| 80              | 0.005682625     | 9606               | Homo sapiens |
| 3               | 0.000213        | 9606               | Homo sapiens |
| 13              | 0.000923        | 9606               | Homo sapiens |
| 9               | 0.000639        | 9606               | Homo sapiens |
| 2               | 0.000142        | 9606               | Homo sapiens |
| 1               | 0.000071        | 9606               | Homo sapiens |

## E8\_severecontrol\_down\_reactome

|      |             |                   |
|------|-------------|-------------------|
| 18   | 0.001278591 | 9606 Homo sapiens |
| 12   | 0.000852    | 9606 Homo sapiens |
| 12   | 0.000852    | 9606 Homo sapiens |
| 34   | 0.002415116 | 9606 Homo sapiens |
| 3    | 0.000213    | 9606 Homo sapiens |
| 3    | 0.000213    | 9606 Homo sapiens |
| 3    | 0.000213    | 9606 Homo sapiens |
| 107  | 0.007600511 | 9606 Homo sapiens |
| 2    | 0.000142    | 9606 Homo sapiens |
| 7    | 0.000497    | 9606 Homo sapiens |
| 23   | 0.001633755 | 9606 Homo sapiens |
| 45   | 0.003196477 | 9606 Homo sapiens |
| 746  | 0.052990482 | 9606 Homo sapiens |
| 2    | 0.000142    | 9606 Homo sapiens |
| 8    | 0.000568    | 9606 Homo sapiens |
| 59   | 0.004190936 | 9606 Homo sapiens |
| 7    | 0.000497    | 9606 Homo sapiens |
| 35   | 0.002486149 | 9606 Homo sapiens |
| 26   | 0.001846853 | 9606 Homo sapiens |
| 1    | 0.000071    | 9606 Homo sapiens |
| 2    | 0.000142    | 9606 Homo sapiens |
| 9    | 0.000639    | 9606 Homo sapiens |
| 36   | 0.002557181 | 9606 Homo sapiens |
| 60   | 0.004261969 | 9606 Homo sapiens |
| 11   | 0.000781    | 9606 Homo sapiens |
| 3    | 0.000213    | 9606 Homo sapiens |
| 7    | 0.000497    | 9606 Homo sapiens |
| 14   | 0.000994    | 9606 Homo sapiens |
| 3    | 0.000213    | 9606 Homo sapiens |
| 2    | 0.000142    | 9606 Homo sapiens |
| 3    | 0.000213    | 9606 Homo sapiens |
| 10   | 0.00071     | 9606 Homo sapiens |
| 2518 | 0.178860634 | 9606 Homo sapiens |
| 90   | 0.006392954 | 9606 Homo sapiens |
| 198  | 0.014064498 | 9606 Homo sapiens |
| 9    | 0.000639    | 9606 Homo sapiens |
| 8    | 0.000568    | 9606 Homo sapiens |
| 3    | 0.000213    | 9606 Homo sapiens |
| 5    | 0.000355    | 9606 Homo sapiens |
| 3    | 0.000213    | 9606 Homo sapiens |
| 9    | 0.000639    | 9606 Homo sapiens |
| 6    | 0.000426    | 9606 Homo sapiens |
| 3    | 0.000213    | 9606 Homo sapiens |
| 4    | 0.000284    | 9606 Homo sapiens |
| 2    | 0.000142    | 9606 Homo sapiens |
| 12   | 0.000852    | 9606 Homo sapiens |
| 6    | 0.000426    | 9606 Homo sapiens |
| 33   | 0.002344083 | 9606 Homo sapiens |
| 72   | 0.005114363 | 9606 Homo sapiens |
| 18   | 0.001278591 | 9606 Homo sapiens |
| 21   | 0.001491689 | 9606 Homo sapiens |
| 7    | 0.000497    | 9606 Homo sapiens |
| 6    | 0.000426    | 9606 Homo sapiens |

## E8\_severecontrol\_down\_reactome

|    |             |                   |
|----|-------------|-------------------|
| 4  | 0.000284    | 9606 Homo sapiens |
| 15 | 0.001065492 | 9606 Homo sapiens |
| 19 | 0.001349624 | 9606 Homo sapiens |
| 7  | 0.000497    | 9606 Homo sapiens |
| 4  | 0.000284    | 9606 Homo sapiens |
| 6  | 0.000426    | 9606 Homo sapiens |
| 47 | 0.003338542 | 9606 Homo sapiens |
| 2  | 0.000142    | 9606 Homo sapiens |
| 12 | 0.000852    | 9606 Homo sapiens |
| 8  | 0.000568    | 9606 Homo sapiens |
| 14 | 0.000994    | 9606 Homo sapiens |
| 16 | 0.001136525 | 9606 Homo sapiens |
| 48 | 0.003409575 | 9606 Homo sapiens |
| 60 | 0.004261969 | 9606 Homo sapiens |
| 75 | 0.005327461 | 9606 Homo sapiens |
| 5  | 0.000355    | 9606 Homo sapiens |
| 8  | 0.000568    | 9606 Homo sapiens |
| 6  | 0.000426    | 9606 Homo sapiens |
| 4  | 0.000284    | 9606 Homo sapiens |
| 5  | 0.000355    | 9606 Homo sapiens |
| 79 | 0.005611593 | 9606 Homo sapiens |
| 29 | 0.002059952 | 9606 Homo sapiens |
| 37 | 0.002628214 | 9606 Homo sapiens |
| 8  | 0.000568    | 9606 Homo sapiens |
| 6  | 0.000426    | 9606 Homo sapiens |
| 6  | 0.000426    | 9606 Homo sapiens |
| 6  | 0.000426    | 9606 Homo sapiens |
| 9  | 0.000639    | 9606 Homo sapiens |
| 72 | 0.005114363 | 9606 Homo sapiens |
| 70 | 0.004972297 | 9606 Homo sapiens |
| 80 | 0.005682625 | 9606 Homo sapiens |
| 26 | 0.001846853 | 9606 Homo sapiens |
| 12 | 0.000852    | 9606 Homo sapiens |
| 9  | 0.000639    | 9606 Homo sapiens |
| 8  | 0.000568    | 9606 Homo sapiens |
| 7  | 0.000497    | 9606 Homo sapiens |
| 9  | 0.000639    | 9606 Homo sapiens |
| 92 | 0.006535019 | 9606 Homo sapiens |
| 22 | 0.001562722 | 9606 Homo sapiens |
| 18 | 0.001278591 | 9606 Homo sapiens |
| 18 | 0.001278591 | 9606 Homo sapiens |
| 27 | 0.001917886 | 9606 Homo sapiens |
| 79 | 0.005611593 | 9606 Homo sapiens |
| 4  | 0.000284    | 9606 Homo sapiens |
| 48 | 0.003409575 | 9606 Homo sapiens |
| 6  | 0.000426    | 9606 Homo sapiens |
| 65 | 0.004617133 | 9606 Homo sapiens |
| 51 | 0.003622674 | 9606 Homo sapiens |
| 3  | 0.000213    | 9606 Homo sapiens |
| 7  | 0.000497    | 9606 Homo sapiens |
| 18 | 0.001278591 | 9606 Homo sapiens |
| 5  | 0.000355    | 9606 Homo sapiens |
| 15 | 0.001065492 | 9606 Homo sapiens |

## E8\_severecontrol\_down\_reactome

|     |             |                   |
|-----|-------------|-------------------|
| 6   | 0.000426    | 9606 Homo sapiens |
| 27  | 0.001917886 | 9606 Homo sapiens |
| 42  | 0.002983378 | 9606 Homo sapiens |
| 86  | 0.006108822 | 9606 Homo sapiens |
| 24  | 0.001704788 | 9606 Homo sapiens |
| 9   | 0.000639    | 9606 Homo sapiens |
| 68  | 0.004830232 | 9606 Homo sapiens |
| 11  | 0.000781    | 9606 Homo sapiens |
| 8   | 0.000568    | 9606 Homo sapiens |
| 26  | 0.001846853 | 9606 Homo sapiens |
| 29  | 0.002059952 | 9606 Homo sapiens |
| 4   | 0.000284    | 9606 Homo sapiens |
| 20  | 0.001420656 | 9606 Homo sapiens |
| 5   | 0.000355    | 9606 Homo sapiens |
| 28  | 0.001988919 | 9606 Homo sapiens |
| 32  | 0.00227305  | 9606 Homo sapiens |
| 33  | 0.002344083 | 9606 Homo sapiens |
| 6   | 0.000426    | 9606 Homo sapiens |
| 4   | 0.000284    | 9606 Homo sapiens |
| 11  | 0.000781    | 9606 Homo sapiens |
| 34  | 0.002415116 | 9606 Homo sapiens |
| 33  | 0.002344083 | 9606 Homo sapiens |
| 15  | 0.001065492 | 9606 Homo sapiens |
| 18  | 0.001278591 | 9606 Homo sapiens |
| 66  | 0.004688166 | 9606 Homo sapiens |
| 8   | 0.000568    | 9606 Homo sapiens |
| 17  | 0.001207558 | 9606 Homo sapiens |
| 133 | 0.009447365 | 9606 Homo sapiens |
| 4   | 0.000284    | 9606 Homo sapiens |
| 9   | 0.000639    | 9606 Homo sapiens |
| 17  | 0.001207558 | 9606 Homo sapiens |
| 20  | 0.001420656 | 9606 Homo sapiens |
| 10  | 0.00071     | 9606 Homo sapiens |
| 28  | 0.001988919 | 9606 Homo sapiens |
| 25  | 0.00177582  | 9606 Homo sapiens |
| 21  | 0.001491689 | 9606 Homo sapiens |
| 16  | 0.001136525 | 9606 Homo sapiens |
| 7   | 0.000497    | 9606 Homo sapiens |
| 16  | 0.001136525 | 9606 Homo sapiens |
| 21  | 0.001491689 | 9606 Homo sapiens |
| 9   | 0.000639    | 9606 Homo sapiens |
| 22  | 0.001562722 | 9606 Homo sapiens |
| 12  | 0.000852    | 9606 Homo sapiens |
| 95  | 0.006748118 | 9606 Homo sapiens |
| 189 | 0.013425202 | 9606 Homo sapiens |
| 6   | 0.000426    | 9606 Homo sapiens |
| 77  | 0.005469527 | 9606 Homo sapiens |
| 10  | 0.00071     | 9606 Homo sapiens |
| 15  | 0.001065492 | 9606 Homo sapiens |
| 11  | 0.000781    | 9606 Homo sapiens |
| 37  | 0.002628214 | 9606 Homo sapiens |
| 19  | 0.001349624 | 9606 Homo sapiens |
| 20  | 0.001420656 | 9606 Homo sapiens |

## E8\_severecontrol\_down\_reactome

|     |             |                   |
|-----|-------------|-------------------|
| 9   | 0.000639    | 9606 Homo sapiens |
| 1   | 0.000071    | 9606 Homo sapiens |
| 70  | 0.004972297 | 9606 Homo sapiens |
| 71  | 0.00504333  | 9606 Homo sapiens |
| 71  | 0.00504333  | 9606 Homo sapiens |
| 25  | 0.00177582  | 9606 Homo sapiens |
| 61  | 0.004333002 | 9606 Homo sapiens |
| 39  | 0.00277028  | 9606 Homo sapiens |
| 88  | 0.006250888 | 9606 Homo sapiens |
| 10  | 0.00071     | 9606 Homo sapiens |
| 28  | 0.001988919 | 9606 Homo sapiens |
| 113 | 0.008026708 | 9606 Homo sapiens |
| 28  | 0.001988919 | 9606 Homo sapiens |
| 12  | 0.000852    | 9606 Homo sapiens |
| 114 | 0.008097741 | 9606 Homo sapiens |
| 3   | 0.000213    | 9606 Homo sapiens |
| 24  | 0.001704788 | 9606 Homo sapiens |
| 73  | 0.005185396 | 9606 Homo sapiens |
| 33  | 0.002344083 | 9606 Homo sapiens |
| 29  | 0.002059952 | 9606 Homo sapiens |
| 38  | 0.002699247 | 9606 Homo sapiens |
| 44  | 0.003125444 | 9606 Homo sapiens |
| 39  | 0.00277028  | 9606 Homo sapiens |
| 20  | 0.001420656 | 9606 Homo sapiens |
| 26  | 0.001846853 | 9606 Homo sapiens |
| 17  | 0.001207558 | 9606 Homo sapiens |
| 17  | 0.001207558 | 9606 Homo sapiens |
| 265 | 0.018823697 | 9606 Homo sapiens |
| 14  | 0.000994    | 9606 Homo sapiens |
| 57  | 0.004048871 | 9606 Homo sapiens |
| 9   | 0.000639    | 9606 Homo sapiens |
| 17  | 0.001207558 | 9606 Homo sapiens |
| 51  | 0.003622674 | 9606 Homo sapiens |
| 25  | 0.00177582  | 9606 Homo sapiens |
| 33  | 0.002344083 | 9606 Homo sapiens |
| 12  | 0.000852    | 9606 Homo sapiens |
| 21  | 0.001491689 | 9606 Homo sapiens |
| 30  | 0.002130985 | 9606 Homo sapiens |
| 22  | 0.001562722 | 9606 Homo sapiens |
| 20  | 0.001420656 | 9606 Homo sapiens |
| 11  | 0.000781    | 9606 Homo sapiens |
| 13  | 0.000923    | 9606 Homo sapiens |
| 17  | 0.001207558 | 9606 Homo sapiens |
| 7   | 0.000497    | 9606 Homo sapiens |
| 34  | 0.002415116 | 9606 Homo sapiens |
| 91  | 0.006463986 | 9606 Homo sapiens |
| 14  | 0.000994    | 9606 Homo sapiens |
| 5   | 0.000355    | 9606 Homo sapiens |
| 21  | 0.001491689 | 9606 Homo sapiens |
| 196 | 0.013922432 | 9606 Homo sapiens |
| 34  | 0.002415116 | 9606 Homo sapiens |
| 32  | 0.00227305  | 9606 Homo sapiens |
| 15  | 0.001065492 | 9606 Homo sapiens |

## E8\_severecontrol\_down\_reactome

|     |             |                   |
|-----|-------------|-------------------|
| 23  | 0.001633755 | 9606 Homo sapiens |
| 25  | 0.00177582  | 9606 Homo sapiens |
| 31  | 0.002202017 | 9606 Homo sapiens |
| 41  | 0.002912346 | 9606 Homo sapiens |
| 18  | 0.001278591 | 9606 Homo sapiens |
| 218 | 0.015485154 | 9606 Homo sapiens |
| 94  | 0.006677085 | 9606 Homo sapiens |
| 4   | 0.000284    | 9606 Homo sapiens |
| 17  | 0.001207558 | 9606 Homo sapiens |
| 18  | 0.001278591 | 9606 Homo sapiens |
| 46  | 0.00326751  | 9606 Homo sapiens |
| 22  | 0.001562722 | 9606 Homo sapiens |
| 16  | 0.001136525 | 9606 Homo sapiens |
| 22  | 0.001562722 | 9606 Homo sapiens |
| 65  | 0.004617133 | 9606 Homo sapiens |
| 39  | 0.00277028  | 9606 Homo sapiens |
| 35  | 0.002486149 | 9606 Homo sapiens |
| 67  | 0.004759199 | 9606 Homo sapiens |
| 6   | 0.000426    | 9606 Homo sapiens |
| 23  | 0.001633755 | 9606 Homo sapiens |
| 17  | 0.001207558 | 9606 Homo sapiens |
| 44  | 0.003125444 | 9606 Homo sapiens |
| 41  | 0.002912346 | 9606 Homo sapiens |
| 17  | 0.001207558 | 9606 Homo sapiens |
| 55  | 0.003906805 | 9606 Homo sapiens |
| 15  | 0.001065492 | 9606 Homo sapiens |
| 38  | 0.002699247 | 9606 Homo sapiens |
| 45  | 0.003196477 | 9606 Homo sapiens |
| 58  | 0.004119903 | 9606 Homo sapiens |
| 134 | 0.009518397 | 9606 Homo sapiens |
| 15  | 0.001065492 | 9606 Homo sapiens |
| 61  | 0.004333002 | 9606 Homo sapiens |
| 31  | 0.002202017 | 9606 Homo sapiens |
| 21  | 0.001491689 | 9606 Homo sapiens |
| 37  | 0.002628214 | 9606 Homo sapiens |
| 45  | 0.003196477 | 9606 Homo sapiens |
| 8   | 0.000568    | 9606 Homo sapiens |
| 142 | 0.01008666  | 9606 Homo sapiens |
| 42  | 0.002983378 | 9606 Homo sapiens |
| 40  | 0.002841313 | 9606 Homo sapiens |
| 40  | 0.002841313 | 9606 Homo sapiens |
| 35  | 0.002486149 | 9606 Homo sapiens |
| 56  | 0.003977838 | 9606 Homo sapiens |
| 203 | 0.014419662 | 9606 Homo sapiens |
| 26  | 0.001846853 | 9606 Homo sapiens |
| 44  | 0.003125444 | 9606 Homo sapiens |
| 53  | 0.003764739 | 9606 Homo sapiens |
| 117 | 0.00831084  | 9606 Homo sapiens |
| 7   | 0.000497    | 9606 Homo sapiens |
| 100 | 0.007103282 | 9606 Homo sapiens |
| 338 | 0.024009092 | 9606 Homo sapiens |
| 38  | 0.002699247 | 9606 Homo sapiens |
| 212 | 0.015058957 | 9606 Homo sapiens |

## E8\_severecontrol\_down\_reactome

|     |             |                   |
|-----|-------------|-------------------|
| 50  | 0.003551641 | 9606 Homo sapiens |
| 8   | 0.000568    | 9606 Homo sapiens |
| 83  | 0.005895724 | 9606 Homo sapiens |
| 40  | 0.002841313 | 9606 Homo sapiens |
| 15  | 0.001065492 | 9606 Homo sapiens |
| 43  | 0.003054411 | 9606 Homo sapiens |
| 43  | 0.003054411 | 9606 Homo sapiens |
| 31  | 0.002202017 | 9606 Homo sapiens |
| 48  | 0.003409575 | 9606 Homo sapiens |
| 21  | 0.001491689 | 9606 Homo sapiens |
| 44  | 0.003125444 | 9606 Homo sapiens |
| 99  | 0.007032249 | 9606 Homo sapiens |
| 110 | 0.00781361  | 9606 Homo sapiens |
| 12  | 0.000852    | 9606 Homo sapiens |
| 11  | 0.000781    | 9606 Homo sapiens |
| 54  | 0.003835772 | 9606 Homo sapiens |
| 65  | 0.004617133 | 9606 Homo sapiens |
| 49  | 0.003480608 | 9606 Homo sapiens |
| 35  | 0.002486149 | 9606 Homo sapiens |
| 27  | 0.001917886 | 9606 Homo sapiens |
| 125 | 0.008879102 | 9606 Homo sapiens |
| 324 | 0.023014633 | 9606 Homo sapiens |
| 142 | 0.01008666  | 9606 Homo sapiens |
| 33  | 0.002344083 | 9606 Homo sapiens |
| 66  | 0.004688166 | 9606 Homo sapiens |
| 143 | 0.010157693 | 9606 Homo sapiens |
| 105 | 0.007458446 | 9606 Homo sapiens |
| 241 | 0.017118909 | 9606 Homo sapiens |
| 132 | 0.009376332 | 9606 Homo sapiens |
| 6   | 0.000426    | 9606 Homo sapiens |
| 27  | 0.001917886 | 9606 Homo sapiens |
| 27  | 0.001917886 | 9606 Homo sapiens |
| 27  | 0.001917886 | 9606 Homo sapiens |
| 24  | 0.001704788 | 9606 Homo sapiens |
| 6   | 0.000426    | 9606 Homo sapiens |
| 124 | 0.008808069 | 9606 Homo sapiens |
| 63  | 0.004475067 | 9606 Homo sapiens |
| 35  | 0.002486149 | 9606 Homo sapiens |
| 103 | 0.00731638  | 9606 Homo sapiens |
| 573 | 0.040701804 | 9606 Homo sapiens |
| 79  | 0.005611593 | 9606 Homo sapiens |
| 36  | 0.002557181 | 9606 Homo sapiens |
| 92  | 0.006535019 | 9606 Homo sapiens |
| 56  | 0.003977838 | 9606 Homo sapiens |
| 101 | 0.007174315 | 9606 Homo sapiens |
| 19  | 0.001349624 | 9606 Homo sapiens |
| 19  | 0.001349624 | 9606 Homo sapiens |
| 478 | 0.033953687 | 9606 Homo sapiens |
| 55  | 0.003906805 | 9606 Homo sapiens |
| 102 | 0.007245347 | 9606 Homo sapiens |
| 159 | 0.011294218 | 9606 Homo sapiens |
| 450 | 0.031964768 | 9606 Homo sapiens |
| 77  | 0.005469527 | 9606 Homo sapiens |

## E8\_severecontrol\_down\_reactome

|      |             |                   |
|------|-------------|-------------------|
| 319  | 0.022659469 | 9606 Homo sapiens |
| 481  | 0.034166785 | 9606 Homo sapiens |
| 167  | 0.01186248  | 9606 Homo sapiens |
| 53   | 0.003764739 | 9606 Homo sapiens |
| 298  | 0.02116778  | 9606 Homo sapiens |
| 259  | 0.0183975   | 9606 Homo sapiens |
| 205  | 0.014561728 | 9606 Homo sapiens |
| 31   | 0.002202017 | 9606 Homo sapiens |
| 194  | 0.013780367 | 9606 Homo sapiens |
| 195  | 0.013851399 | 9606 Homo sapiens |
| 9    | 0.000639    | 9606 Homo sapiens |
| 86   | 0.006108822 | 9606 Homo sapiens |
| 250  | 0.017758204 | 9606 Homo sapiens |
| 221  | 0.015698253 | 9606 Homo sapiens |
| 114  | 0.008097741 | 9606 Homo sapiens |
| 965  | 0.068546669 | 9606 Homo sapiens |
| 192  | 0.013638301 | 9606 Homo sapiens |
| 144  | 0.010228726 | 9606 Homo sapiens |
| 220  | 0.01562722  | 9606 Homo sapiens |
| 454  | 0.032248899 | 9606 Homo sapiens |
| 352  | 0.025003552 | 9606 Homo sapiens |
| 219  | 0.015556187 | 9606 Homo sapiens |
| 451  | 0.032035801 | 9606 Homo sapiens |
| 401  | 0.02848416  | 9606 Homo sapiens |
| 538  | 0.038215656 | 9606 Homo sapiens |
| 252  | 0.01790027  | 9606 Homo sapiens |
| 285  | 0.020244353 | 9606 Homo sapiens |
| 897  | 0.063716437 | 9606 Homo sapiens |
| 187  | 0.013283137 | 9606 Homo sapiens |
| 1787 | 0.126935644 | 9606 Homo sapiens |
| 884  | 0.06279301  | 9606 Homo sapiens |
| 945  | 0.067126012 | 9606 Homo sapiens |
| 811  | 0.057607615 | 9606 Homo sapiens |
| 1060 | 0.075294786 | 9606 Homo sapiens |
| 143  | 0.010157693 | 9606 Homo sapiens |
| 2268 | 0.161102429 | 9606 Homo sapiens |

E8\_severecontrol\_down\_reactome

Submitted entities found

FCN1;CDA;CXCL8;PTAFR;C5AR1;FPR1;CXCL1;PYGL;FPR2;SIRPB1;FCAR;CST3;FCGR3B;CXCR1;CXCR2;SIRPA;P  
CXCL8;CCL3L1;CCL20;IL1B;IL1R2;PTAFR;FPR1;CXCL1;PTGS2  
FCGR1BP;IFITM3;FCN1;CDA;CXCL8;NCF1;NCF2;NCF4;CXCL1;PYGL;TREM1;SIRPB1;IFIT3;FCAR;FCGR3B;SIRPA;P  
FCN1;CDA;CXCL8;NCF1;NCF2;PTAFR;NCF4;C5AR1;FPR1;CXCL1;FPR2;PYGL;MEFV;TREM1;SIRPB1;FCAR;CST3;F  
CXCL8;CXCR1;CCL3L1;CCL20;CXCR2;CXCL1  
LYN;FCGR1BP;IFITM3;EGR1;CXCL8;CEBPD;CCL3L1;CCL20;IL1R2;PTAFR;OSM;FPR1;CXCL1;FOS;PTGS2;IFIT3;O  
CXCL8;CXCR1;CCL3L1;CCL20;C5AR1;CXCR2;FPR1;PROK2;CXCL1;FPR2  
LYN;CXCL8;CEBPD;CCL3L1;CCL20;IL1R2;PTAFR;OSM;FPR1;CXCL1;FOS;PTGS2;IL1B;S100P  
CXCL8;CCL3L1;CCL20;PTAFR;C5AR1;FPR1;CXCL1;FPR2;HCAR2;HCAR3;CXCR1;CXCR2;PROK2;FFAR2  
FOSL1;EGR1;EGR2;FOS;TRIB1  
CXCL8;CEBPD;IL1B;OSM;FOS;PTGS2  
FOSL1;EGR1;EGR2;FOS;TRIB1  
RGS18;RGS17;GABBR1;CXCL8;CCL20;CCL4L2;C5AR1;FPR1;CXCL1;FPR2;HCAR2;HCAR3;RGS2;CXCR1;CXCR2  
GABBR1;CXCL8;CCL3L1;CCL20;PTAFR;C5AR1;FPR1;CXCL1;FPR2;HCAR2;HCAR3;CXCR1;CXCR2;PROK2;FFAR2  
RGS18;RGS17;GABBR1;CXCL8;CCL3L1;CCL20;CCL4L2;PTAFR;C5AR1;FPR1;CXCL1;FPR2;HCAR2;HCAR3;RGS2;C  
NCF1;NCF2;NCF4;S100A9;S100A8  
IL1B  
RGS18;RGS17;GABBR1;CXCL8;CCL20;CCL4L2;PTAFR;C5AR1;FPR1;CXCL1;FPR2;HCAR2;HCAR3;RGS2;CXCR1;CX  
NCF1;NCF2;NCF4  
FOSL1;EGR1;EGR2;FOS;TRIB1  
IFITM3;FCGR1BP;EGR1;OAS1;PTAFR;IFIT3;TRIM34  
IFITM3;EGR1;OAS1;IFIT3  
BPIFB1;SLC11A1;LYZ;PGLYRP1;S100A9;S100A8;CAMP  
SIRPA;SIRPB1  
FOSL1;EGR1;EGR2;FOS;TRIB1  
HCAR2;HCAR3  
S100A9;TLR4;S100A8  
FCGR1BP;NCF1;NCF2;NCF4;CLEC4E;S100A9;TLR4;S100A8  
S100A9;TLR4;S100A8  
FPR1;FPR2  
IL1B  
S100A9;TLR4;S100A8  
S100A9;S100A8  
S100A9;TLR4;S100A8  
S100A9;TLR4;S100A8  
LYN;CLEC4D;CLEC7A;IL1B;CLEC4E  
TNFRSF10C  
NCF1;NCF2;SLC11A1;NCF4  
GLB1L;B3GNT7  
S100P;FOS;S100A9;TLR4;S100A8  
S100P;FOS;S100A9;TLR4;S100A8  
GLB1L  
CXCL8;IL1B;FOS  
IL1B;MEFV  
IL1B;MEFV  
S100P;FOS;S100A9;TLR4;S100A8  
S100P;FOS;S100A9;TLR4;S100A8  
SERPING1  
COL4A4;PCOLCE  
BCL2A1  
GLB1L  
FPR1

FCGR1BP;OAS1;PTAFR;TRIM34  
FOS  
LYN;CLEC4D;CLEC4E  
NCF1;NCF2;NCF4  
GABBR1;KCNJ15  
GABBR1;KCNJ15  
GABBR1;KCNJ15  
S100P;FOS;S100A9;TLR4;S100A8  
CYP27A1  
CXCL8  
IL1B  
CLEC7A;IL1B  
LYN;FOSL1;EGR1;EGR2;NCF1;NCF2;COL4A4;NCF4;FOS;TRIB1  
FPR1  
PRR4  
IL1R2;IL1B;S100P  
GABBR1;KCNJ15  
RGS18;RGS17;RGS2;PTAFR;PROK2;FFAR2;FPR2  
EGR2  
GLB1L  
APOBEC3A  
LPCAT2;PLBD1  
FOS  
PRR4;SIRPA;SIRPB1  
CXCL8  
LYN  
FPR1  
GLB1L  
TLR4  
PLAUR  
APOBEC3A  
NCF1;NCF2;NCF4  
RGS18;RGS17;CXCL8;NCF1;CCL3L1;NCF2;CCL4L2;PTAFR;NCF4;C5AR1;FPR1;CXCL1;FPR2;HCAR2;HCAR3;RGS2;  
H1-5;CXCL8;IL1B;FOS  
S100P;FOS;S100A9;TLR4;S100A8  
GABBR1;KCNJ15  
GABBR1;KCNJ15  
FPR1  
FOS  
FCN1  
APOBEC3A  
NCF1;NCF2;NCF4  
LYN  
ESCO2  
SLC11A1  
H1-5  
FCGR1BP;CLEC4E  
TREM1;SIRPB1  
FCN1;C5AR1;SERPING1  
PHOSPHO1;SLC44A4  
PLAUR  
LYN  
FCN1

COL4A4  
OAS1  
EGR2;CEBPD  
LYN  
S100P  
LYN  
FOS  
H1-5  
LTBR  
CA14  
OSM  
BST1;FCGR3B;PLAUR  
FCGR1BP;NCF1;NCF2;HECW2;NCF4;CLEC4E;S100A9;TLR4;S100A8  
S100P;FOS;TLR4  
S100P;FOS;TLR4  
PLXNA2  
LYN  
PLBD1  
IRAG1  
TLR4  
S100P;FOS;TLR4  
BCL2A1  
BCL2A1  
LYN  
TLR4  
PLXNA2  
FPR1  
PLXNA2  
S100P;FOS;TLR4  
S100P;FOS;TLR4  
S100P;FOS;TLR4  
COL4A4;PCOLCE  
GABBR1;KCNJ15  
TLR4  
PLXNA2  
MARCKS  
TLR4  
IL1R2;IL1B;S100P  
CDA;GMPR  
SERPING1  
SERPING1  
SPI1  
NCF1;NCF2;NCF4  
PTGS2  
IL1B  
NCF1;NCF2;CHN1;NCF4  
LYN;CEACAM3;SIRPA;TREM1;SIRPB1  
COL4A4;PCOLCE  
TLR4  
LYN  
MEFV  
LYN  
PYGL

PLBD1  
CSTA;KRT17;KRT23  
C5AR1;SERPING1  
NCF1;NCF2;NCF4  
SERPING1  
LYN  
TNFRSF10C  
LYN  
FPR1  
LYN  
BST1;PTGS2  
CYP2F1  
PTGS2  
FFAR2  
LYN  
GLB1L  
GLB1L  
CYP2F1  
S100P  
LYN  
OSM  
CST3;LYZ  
COL4A4  
PTGS2  
TFF3;FOS  
ARG1  
TLR4  
PHOSPHO1;SLC44A4;LPCAT2;PLBD1  
LYN  
PHOSPHO1  
PTGS2  
SLC11A1  
CDA  
MEFV  
LYN  
LYN  
PRR4  
IRAG1  
FOS  
PTGS2  
B3GNT7  
GLB1L  
CYP27A1  
LYN;FCGR2A;IL1B;MEFV  
H1-5;IL1B;TLR4  
LYN;FCGR2A  
COL4A4;PCOLCE  
S100A9;TLR4;S100A8  
SPI1  
DHRS9  
PYGL  
LYN  
GABBR1;KCNJ15

E8\_severecontrol\_down\_reactome

PLBD1  
CST3;MXRA8  
S100P;FOS  
S100P;FOS  
S100P;FOS  
LYN  
SERPING1  
FOS  
GLB1L;B3GNT7  
COL4A4  
COL4A4  
NCF1;NCF2;NCF4;S100A9;S100A8  
CYP27A1  
GMPR  
TFF3;FOS  
BASP1  
GLB1L  
S100P;FOS  
TTYH1  
FPR1  
LYN  
FPR1  
LYN  
LYN;FOS  
LYN  
LYN  
LYN  
LYN;IFITM3;LILRA6;FCGR1BP;NCF1;NCF2;NCF4;FPR1;TREM1;HECW2;CLEC4E;TLR4;S100A9;S100A8  
CST3;MXRA8  
H1-5  
LYN  
S100P  
PLN;TTYH1  
DHRS9  
PTGS2  
PTGS2  
GLB1L  
FPR1  
COL4A4  
LYN;FCGR2A  
CXCL8;SERPING1  
RGS17  
PLN  
ARHGEF40  
CSTA;KRT17;KRT23  
NCF1;NCF2;BASP1;CHN1;NCF4;ARHGEF40  
CXCL8;SERPING1  
RAB31  
PRR4  
DHRS9;TFF3;FOS  
COL4A4  
FOS  
EGR1

COL4A4  
TLR4  
COL4A4  
PLXNA2  
H1-5  
PHOSPHO1;SLC44A4;LPCAT2;PLBD1  
CXCL8  
LYN  
PLN  
CYP27A1  
MEFV  
CYP2F1  
B3GNT7  
DHRS9  
GLB1L  
CYP27A1  
FOS  
SLC44A4;SLC11A1  
ARHGEF40  
COL4A4  
ARHGEF40  
GLB1L  
G0S2  
FOS  
COL4A4  
ARHGEF40  
CYP27A1  
G0S2  
PTGS2  
NCF1;NCF2;NCF4  
FPR1  
CYP27A1;CYP2F1  
OAS1  
RAB31  
PRR4  
LYN;FPR1  
GABBR1  
H1-5;TLR4  
LYN;FCGR2A  
LYN;FCGR2A  
LYN;FCGR2A  
LYN  
LYN  
NCF1;NCF2;BASP1;CHN1;NCF4;ARHGEF40;S100A9;S100A8  
LYN  
LTBR  
S100P  
LYN;CXCL8;SERPING1  
LYN  
FPR1  
CEACAM3;LYN;CXCL8;IRAG1;PLAUR;SERPING1;SIRPA;TREM1;SIRPB1  
MARCKS  
NCF1;NCF2;BASP1;CHN1;NCF4;ARHGEF40;S100A9;S100A8

ARHGEF40  
FCN1  
CYP27A1  
FOS  
REPS2  
EGR2  
EGR2  
IRAG1  
FPR1  
FCN1  
LILRA6;IFITM3;TREM1  
CYP27A1  
GABBR1;KCNJ15  
FCGR2A  
LYN  
CD24  
LYN;FOS  
GLB1L  
RAB31  
B3GNT7  
FPR1  
LYN;EGR2;COL4A4;PLXNA2;CD24  
CDA;GMPR  
PLN  
MARCKS  
BST1;PTGS2  
COL4A4  
B3GNT7;GLB1L;PYGL  
SPI1  
ARHGEF40  
LYN  
LYN  
LYN  
FCGR2A  
CHN1  
PTGS2  
GLB1L  
REPS2  
ARHGEF40  
LYN;EGR2;CSTA;SPI1;CEBPD;KRT17;COL4A4;PLXNA2;KRT23;CD24  
PTGS2  
FPR1  
DHRS9  
EGR1  
LYN  
CEBPD  
LYN  
LYN;BCL2A1;FPR1  
ESCO2  
CYP27A1;CYP2F1  
FPR1  
H1-5;CXCL8;NCF1;NCF2;IL1B;NCF4;FOS;TLR4  
GLB1L

E8\_severecontrol\_down\_reactome

COL4A4;PCOLCE  
H1-5;CXCL8;NCF1;NCF2;IL1B;NCF4;FOS;TLR4  
GABBR1;KCNJ15  
PLN  
LYN;COL4A4;PLXNA2;CD24  
TNFRSF10C;FOS  
BST1;PTGS2  
CEBPD  
SLC44A4;SLC11A1  
CYP27A1;GLB1L  
HECW2  
EGR1  
CYP27A1  
GABBR1;KCNJ15  
EGR1  
CYP27A1;PHOSPHO1;SLC44A4;GLB1L;LPCAT2;PLBD1;G0S2;PTGS2  
CYP27A1;CYP2F1  
GLB1L  
PTGS2  
SLC44A4;PLN;TTYH1;SLC11A1  
LYN;ESCO2  
RAB31;REPS2  
LYN;ESCO2  
FPR1  
CST3;BST1;FCGR3B;RAB31;B3GNT7;GLB1L;MXRA8;PLAUR  
RAB31;REPS2  
ARG1  
LYN;FCGR2A;CEBPD;IL1B;FPR1;MEFV  
APOBEC3A  
LYN;BCL2A1;CEBPD;FPR1;MEFV;CYP27A1;FCGR2A;GLB1L;IL1B;SERPING1;TLR4;S100A9;S100A8  
SPI1;TNFRSF10C;FOS  
SPI1;TNFRSF10C;FOS  
CST3;BST1;FCGR3B;RAB31;B3GNT7;GLB1L;MXRA8;PLAUR;LYZ  
SPI1;TNFRSF10C;FOS  
DHRS9  
CDA;SLC44A4;ARG1;G0S2;GMPR;PYGL;PTGS2;CYP27A1;BST1;PHOSPHO1;MARCKS;B3GNT7;GLB1L;LPCAT2;PLE

Mapped entities

```
};LYN;EGR1;CCL2  
}
```

E8\_severecontrol\_down\_reactome

Found reaction identifiers

R-HSA-6798743;R-HSA-6799350;R-HSA-6798739;R-HSA-6800434;R-HSA-6798751;R-HSA-6798749;R-HSA-6798748;R-HSA-8937656;R-HSA-6784160;R-HSA-6790029;R-HSA-8937654  
R-HSA-8983688;R-HSA-8983680;R-HSA-1222685;R-HSA-8863895;R-HSA-936985;R-HSA-2562564;R-HSA-5621366;R-HSA-1222685;R-HSA-879362;R-HSA-450325;R-HSA-5607750;R-HSA-5607745;R-HSA-5362500;R-HSA-936985;R-HSA-373813;R-HSA-443986;R-HSA-373791;R-HSA-373087  
R-HSA-8983688;R-HSA-9677585;R-HSA-446862;R-HSA-6789615;R-HSA-8983680;R-HSA-446868;R-HSA-450325;R-HSA-373813;R-HSA-443986;R-HSA-964811;R-HSA-444691;R-HSA-375395;R-HSA-444527;R-HSA-373791;R-HSA-373087;R-HSA-507719;R-HSA-6783524;R-HSA-6784160;R-HSA-446862;R-HSA-6789615;R-HSA-446868;R-HSA-450325;R-HSA-964811;R-HSA-375395;R-HSA-3296309;R-HSA-444527;R-HSA-391913;R-HSA-444171;R-HSA-374251;R-HSA-9613202;R-HSA-9031624;R-HSA-9613207;R-HSA-9613210;R-HSA-9031616;R-HSA-9613213;R-HSA-9612483;R-HSA-6790036;R-HSA-6789524;R-HSA-6789615;R-HSA-6790029;R-HSA-6789325  
R-HSA-9613202;R-HSA-9031624;R-HSA-9613207;R-HSA-9613210;R-HSA-9031616;R-HSA-9613213;R-HSA-9612483;R-HSA-392212;R-HSA-749454;R-HSA-8982012;R-HSA-8982019;R-HSA-749456;R-HSA-380073;R-HSA-8982020  
R-HSA-964811;R-HSA-375395;R-HSA-3296309;R-HSA-444527;R-HSA-391913;R-HSA-444171;R-HSA-374251;R-HSA-8982025;R-HSA-392133;R-HSA-8982026;R-HSA-749448;R-HSA-749454;R-HSA-964811;R-HSA-749452;R-HSA-9626832;R-HSA-9626880;R-HSA-9626816;R-HSA-9626848;R-HSA-9626817;R-HSA-5668629;R-HSA-5218827;R-HSA-5660663;R-HSA-5660622  
R-HSA-8982025;R-HSA-392133;R-HSA-8982026;R-HSA-749448;R-HSA-749454;R-HSA-749452;R-HSA-8982017;R-HSA-1236967  
R-HSA-9613202;R-HSA-9031624;R-HSA-9613207;R-HSA-9613210;R-HSA-9031616;R-HSA-9613213;R-HSA-9612483;R-HSA-8983688;R-HSA-8983680;R-HSA-1015702;R-HSA-1031716;R-HSA-1015699;R-HSA-8983671;R-HSA-1031713  
R-HSA-1015702;R-HSA-1015699  
R-HSA-6801687;R-HSA-435171;R-HSA-6809521;R-HSA-6789072;R-HSA-8862320;R-HSA-6798528;R-HSA-8862300;R-HSA-391157;R-HSA-210274;R-HSA-391156;R-HSA-391158;R-HSA-391153;R-HSA-391168;R-HSA-391152;R-HSA-9613202;R-HSA-9031624;R-HSA-9613207;R-HSA-9613210;R-HSA-9031616;R-HSA-9613213;R-HSA-9612483;R-HSA-444661;R-HSA-3296309  
R-HSA-5602383;R-HSA-5602606  
R-HSA-8863895;R-HSA-1236967;R-HSA-1236939;R-HSA-1236955;R-HSA-1236940;R-HSA-1236941  
R-HSA-5602353;R-HSA-5602672  
R-HSA-444527;R-HSA-391913  
R-HSA-449058;R-HSA-448703  
R-HSA-6805943;R-HSA-8870678;R-HSA-5432849;R-HSA-8869667;R-HSA-5432852;R-HSA-5432825  
R-HSA-6798528;R-HSA-6798474  
R-HSA-5602353;R-HSA-5602672;R-HSA-5602383;R-HSA-5602606  
R-HSA-5602353;R-HSA-5602672;R-HSA-5602383;R-HSA-5602606  
R-HSA-5660663;R-HSA-5621366;R-HSA-5621363;R-HSA-5607738;R-HSA-5621370;R-HSA-5607750;R-HSA-5624486;R-HSA-5633414;R-HSA-5633441  
R-HSA-6789092;R-HSA-435171  
R-HSA-2025724;R-HSA-1630306  
R-HSA-166082;R-HSA-168166;R-HSA-2201316;R-HSA-166119;R-HSA-166091;R-HSA-2201322;R-HSA-166286;R-HSA-166082;R-HSA-168166;R-HSA-2201316;R-HSA-166119;R-HSA-166091;R-HSA-2201322;R-HSA-166286;R-HSA-1630306  
R-HSA-3790137;R-HSA-3788745;R-HSA-4568740;R-HSA-4568737;R-HSA-3797196;R-HSA-3857308;R-HSA-3797202  
R-HSA-449058;R-HSA-879221;R-HSA-448703;R-HSA-877361  
R-HSA-449058;R-HSA-879221;R-HSA-448703;R-HSA-877361  
R-HSA-166082;R-HSA-168166;R-HSA-2201316;R-HSA-166119;R-HSA-166091;R-HSA-2201322;R-HSA-166286;R-HSA-166082;R-HSA-168166;R-HSA-2201316;R-HSA-166119;R-HSA-166091;R-HSA-2201322;R-HSA-166286;R-HSA-9651456;R-HSA-9651467;R-HSA-9650447  
R-HSA-2559639;R-HSA-2022141  
R-HSA-9725338  
R-HSA-9036061;R-HSA-2265534  
R-HSA-3656382

E8\_severecontrol\_down\_reactome

R-HSA-1031716;R-HSA-1031713  
R-HSA-9625479;R-HSA-9625465  
R-HSA-5621366;R-HSA-5621347;R-HSA-5621363;R-HSA-5621356;R-HSA-5621353;R-HSA-5621355;R-HSA-5621370;R-HSA-5621376  
R-HSA-1222376  
R-HSA-1013020;R-HSA-1013013;R-HSA-1013012  
R-HSA-1013020;R-HSA-1013013;R-HSA-1013012  
R-HSA-1013020;R-HSA-1013013;R-HSA-1013012  
R-HSA-166082;R-HSA-2201316;R-HSA-2569057;R-HSA-166091;R-HSA-2562541;R-HSA-2201322;R-HSA-937029;R-HSA-9035960;R-HSA-5602170  
R-HSA-517731  
R-HSA-449058  
R-HSA-5660663;R-HSA-5607750;R-HSA-5607745;R-HSA-5660622;R-HSA-5607758;R-HSA-5607738  
R-HSA-9613202;R-HSA-205319;R-HSA-9613207;R-HSA-1433488;R-HSA-1562641;R-HSA-9613210;R-HSA-9613213;R-HSA-3656382  
R-HSA-420598  
R-HSA-507719;R-HSA-446694;R-HSA-446692;R-HSA-168166;R-HSA-446862;R-HSA-446894;R-HSA-446701;R-HSA-446702;R-HSA-1013020;R-HSA-1013013;R-HSA-1013012  
R-HSA-418582;R-HSA-8982025;R-HSA-8982026;R-HSA-749448;R-HSA-749452;R-HSA-8982017;R-HSA-379048  
R-HSA-9619667;R-HSA-9615638;R-HSA-9621399;R-HSA-9616116;R-HSA-9614773;R-HSA-9614778;R-HSA-9621400;R-HSA-4341669  
R-HSA-77609  
R-HSA-1482533;R-HSA-1482547;R-HSA-1482856  
R-HSA-9768950;R-HSA-9768945  
R-HSA-210274;R-HSA-391168;R-HSA-419011;R-HSA-433711;R-HSA-391151;R-HSA-391150;R-HSA-420598;R-HSA-391151  
R-HSA-517731  
R-HSA-9012651;R-HSA-9012650;R-HSA-9012654  
R-HSA-3656382  
R-HSA-2090079  
R-HSA-2562564;R-HSA-2569057;R-HSA-2562541  
R-HSA-162836;R-HSA-162729  
R-HSA-77609;R-HSA-83677  
R-HSA-9014424  
R-HSA-9613202;R-HSA-205319;R-HSA-9613207;R-HSA-1562641;R-HSA-3296309;R-HSA-5362518;R-HSA-9613210;R-HSA-3790137;R-HSA-3788745;R-HSA-4568740;R-HSA-450292;R-HSA-450325;R-HSA-3222546;R-HSA-4568737;R-HSA-166286;R-HSA-166284;R-HSA-2559414;R-HSA-8870678;R-HSA-450325;R-HSA-5362500;R-HSA-936985;R-HSA-1013020;R-HSA-420688;R-HSA-1013013;R-HSA-1013012  
R-HSA-1013020;R-HSA-1013013;R-HSA-1013012  
R-HSA-2025882;R-HSA-9690461  
R-HSA-450292;R-HSA-450325  
R-HSA-2855125  
R-HSA-77609;R-HSA-83677  
R-HSA-9018808  
R-HSA-9027373;R-HSA-9032478;R-HSA-9027425  
R-HSA-2468039;R-HSA-2473152  
R-HSA-435171  
R-HSA-211239;R-HSA-211247  
R-HSA-1236939;R-HSA-1236955;R-HSA-1236940;R-HSA-1236941  
R-HSA-210274;R-HSA-210292  
R-HSA-9021306;R-HSA-166753;R-HSA-166726;R-HSA-964811;R-HSA-8852481;R-HSA-375395;R-HSA-166792;R-HSA-1483159;R-HSA-444433  
R-HSA-158982;R-HSA-159001;R-HSA-158942;R-HSA-158959;R-HSA-159005;R-HSA-158925  
R-HSA-210291  
R-HSA-166726;R-HSA-2855125

E8\_severecontrol\_down\_reactome

R-HSA-2396234  
R-HSA-8983688;R-HSA-8983680;R-HSA-8983671  
R-HSA-381377;R-HSA-381283;R-HSA-977271;R-HSA-381337;R-HSA-977392  
R-HSA-9027273;R-HSA-9027272;R-HSA-9021627;R-HSA-9027275;R-HSA-9027281;R-HSA-9012657;R-HSA-9027280  
R-HSA-879411;R-HSA-879362  
R-HSA-114577;R-HSA-432295  
R-HSA-9768950;R-HSA-9768945  
R-HSA-4647594  
R-HSA-5668789;R-HSA-5676593;R-HSA-5676591  
R-HSA-1475025;R-HSA-1475017  
R-HSA-6783524;R-HSA-6783552  
R-HSA-162836;R-HSA-162729;R-HSA-8940388  
R-HSA-8863895;R-HSA-983147;R-HSA-1236967;R-HSA-1236939;R-HSA-1236955;R-HSA-983157;R-HSA-983156;R-HSA-983155  
R-HSA-450358;R-HSA-450292;R-HSA-450325;R-HSA-168166  
R-HSA-450358;R-HSA-450292;R-HSA-450325;R-HSA-168166  
R-HSA-399951;R-HSA-399946;R-HSA-399947;R-HSA-399931;R-HSA-399944  
R-HSA-205319;R-HSA-1433506;R-HSA-205244  
R-HSA-1482612;R-HSA-1482685  
R-HSA-418442  
R-HSA-450358  
R-HSA-450358;R-HSA-450292;R-HSA-450325;R-HSA-168166  
R-HSA-9725338  
R-HSA-9725338  
R-HSA-9027274;R-HSA-9029149;R-HSA-9029151;R-HSA-9029150;R-HSA-9029155;R-HSA-9024723;R-HSA-9029158;R-HSA-9029159  
R-HSA-450358;R-HSA-936952;R-HSA-936985;R-HSA-936951;R-HSA-937075;R-HSA-936947  
R-HSA-399939;R-HSA-399952;R-HSA-399930  
R-HSA-2134519;R-HSA-2134506  
R-HSA-416723  
R-HSA-2562564;R-HSA-936941;R-HSA-168166;R-HSA-2569057;R-HSA-166245;R-HSA-5362486;R-HSA-2562541;R-HSA-2562542  
R-HSA-2562564;R-HSA-936941;R-HSA-168166;R-HSA-2569057;R-HSA-166245;R-HSA-5362486;R-HSA-2562541;R-HSA-2562542  
R-HSA-450358;R-HSA-450292;R-HSA-450325;R-HSA-168166  
R-HSA-2559639;R-HSA-2022141;R-HSA-2213207;R-HSA-2396234  
R-HSA-1013020;R-HSA-420688;R-HSA-1013013;R-HSA-1013012  
R-HSA-936941;R-HSA-5362500;R-HSA-166245;R-HSA-5362486;R-HSA-2213017;R-HSA-2201338;R-HSA-166271  
R-HSA-399942;R-HSA-399941;R-HSA-399934;R-HSA-399935;R-HSA-399933;R-HSA-399928  
R-HSA-399978  
R-HSA-2562564  
R-HSA-507719;R-HSA-446694;R-HSA-446692;R-HSA-449058;R-HSA-168166;R-HSA-446862;R-HSA-446894;R-HSA-446893  
R-HSA-73608;R-HSA-514604  
R-HSA-9651456;R-HSA-9651467;R-HSA-9650447  
R-HSA-9651456;R-HSA-9651467;R-HSA-9650447  
R-HSA-9616243;R-HSA-9634433;R-HSA-9616214;R-HSA-9617207;R-HSA-8865505;R-HSA-9617064;R-HSA-9634429  
R-HSA-5218827;R-HSA-5218841  
R-HSA-2161951  
R-HSA-449058  
R-HSA-9013145;R-HSA-9013144  
R-HSA-210291;R-HSA-114577;R-HSA-203156;R-HSA-8867135;R-HSA-202703  
R-HSA-8948232;R-HSA-1650808;R-HSA-8944265;R-HSA-2002460;R-HSA-8948234;R-HSA-2022073;R-HSA-8948224;R-HSA-8948223  
R-HSA-168915;R-HSA-937029;R-HSA-168921  
R-HSA-879917;R-HSA-912629;R-HSA-912627  
R-HSA-879221;R-HSA-877361  
R-HSA-388833;R-HSA-388829  
R-HSA-71588;R-HSA-71590;R-HSA-453339

E8\_severecontrol\_down\_reactome

R-HSA-1482825  
R-HSA-6810357;R-HSA-6811539;R-HSA-6814387;R-HSA-8942224;R-HSA-6814734;R-HSA-6814764;R-HSA-6814298;F  
R-HSA-9021306;R-HSA-964811;R-HSA-8852481;R-HSA-375395;R-HSA-8852266  
R-HSA-5218827;R-HSA-5218841  
R-HSA-158357;R-HSA-9650473;R-HSA-158399  
R-HSA-9705729;R-HSA-9705726;R-HSA-9707977;R-HSA-9705738;R-HSA-9705467  
R-HSA-5633414;R-HSA-5633441  
R-HSA-9670418;R-HSA-9670417;R-HSA-9670416;R-HSA-9670426;R-HSA-9670414;R-HSA-9670413;R-HSA-9670412  
R-HSA-165718;R-HSA-9679044;R-HSA-165692  
R-HSA-9670418;R-HSA-9670417;R-HSA-9670416;R-HSA-9670426;R-HSA-9670414;R-HSA-9670413;R-HSA-9670412  
R-HSA-8870346;R-HSA-2309773  
R-HSA-211983  
R-HSA-9027627;R-HSA-9027532;R-HSA-9028255;R-HSA-9027607  
R-HSA-444171  
R-HSA-1168456;R-HSA-1168459  
R-HSA-1605624;R-HSA-1606312;R-HSA-1605724  
R-HSA-2090079  
R-HSA-76416;R-HSA-76354;R-HSA-76434;R-HSA-76475;R-HSA-76397;R-HSA-143468  
R-HSA-168166  
R-HSA-5624486  
R-HSA-6783524;R-HSA-6783552  
R-HSA-976734;R-HSA-977136  
R-HSA-2328145;R-HSA-2426450;R-HSA-4084501  
R-HSA-9026408  
R-HSA-9009371;R-HSA-9018494;R-HSA-9018497;R-HSA-9018499;R-HSA-9009378  
R-HSA-70569  
R-HSA-2562564  
R-HSA-1483159;R-HSA-1482884;R-HSA-1482612;R-HSA-1482533;R-HSA-1482547;R-HSA-444433;R-HSA-1482685;R  
R-HSA-3928651;R-HSA-3928602;R-HSA-3928648  
R-HSA-1483096  
R-HSA-9018880  
R-HSA-435171  
R-HSA-73608  
R-HSA-879221;R-HSA-877361  
R-HSA-9027273;R-HSA-9027272;R-HSA-9027275;R-HSA-9027274;R-HSA-9029149;R-HSA-9029151;R-HSA-9032478;F  
R-HSA-9674546;R-HSA-9677585;R-HSA-9705726;R-HSA-9674808;R-HSA-9674558;R-HSA-9705467;R-HSA-9674563;F  
R-HSA-420598;R-HSA-419011;R-HSA-433711;R-HSA-419003  
R-HSA-418442  
R-HSA-450292;R-HSA-450325  
R-HSA-9026408  
R-HSA-2025724  
R-HSA-9036061;R-HSA-2265534  
R-HSA-192123  
R-HSA-9664275;R-HSA-449058;R-HSA-9664278;R-HSA-9664261;R-HSA-879221;R-HSA-448703;R-HSA-877361  
R-HSA-2562564;R-HSA-449058;R-HSA-211239;R-HSA-211247  
R-HSA-2029452;R-HSA-2029449;R-HSA-1861621;R-HSA-2029459  
R-HSA-8948232;R-HSA-8944265;R-HSA-1650808;R-HSA-2002460;R-HSA-8948234;R-HSA-2022141;R-HSA-2022073;F  
R-HSA-8863895  
R-HSA-8865491;R-HSA-8865505;R-HSA-8865498  
R-HSA-5362518  
R-HSA-71588;R-HSA-71590;R-HSA-453339  
R-HSA-388831  
R-HSA-1013020;R-HSA-1013013;R-HSA-1013012

E8\_severecontrol\_down\_reactome

R-HSA-1482884  
R-HSA-8952289  
R-HSA-450292;R-HSA-450325;R-HSA-168166  
R-HSA-450292;R-HSA-450325;R-HSA-168166  
R-HSA-450292;R-HSA-450325;R-HSA-168166  
R-HSA-139842;R-HSA-453200;R-HSA-437118;R-HSA-453183;R-HSA-114600  
R-HSA-158357;R-HSA-9650473;R-HSA-158399  
R-HSA-9625479;R-HSA-9625465  
R-HSA-2090079;R-HSA-2025724;R-HSA-1630306  
R-HSA-375151  
R-HSA-8944265  
R-HSA-9626832;R-HSA-9626880;R-HSA-9626816;R-HSA-9626848;R-HSA-9626817;R-HSA-5668629;R-HSA-5218827;R-HSA-193792;R-HSA-193713;R-HSA-193719;R-HSA-193780;R-HSA-193787;R-HSA-193737  
R-HSA-514604  
R-HSA-9009371;R-HSA-9625479;R-HSA-9018494;R-HSA-9018497;R-HSA-9018499;R-HSA-9625465;R-HSA-9009378  
R-HSA-9693125  
R-HSA-4341669  
R-HSA-450292;R-HSA-450325;R-HSA-168166  
R-HSA-2744349;R-HSA-2744242  
R-HSA-165718;R-HSA-9679044;R-HSA-165692  
R-HSA-879917;R-HSA-912629;R-HSA-912627  
R-HSA-170846  
R-HSA-1433428;R-HSA-205319;R-HSA-1433488;R-HSA-1433456;R-HSA-1562641;R-HSA-1470012;R-HSA-1470010;R-HSA-450292;R-HSA-450325;R-HSA-2730851;R-HSA-2730886  
R-HSA-3928623;R-HSA-4093336;R-HSA-3928627;R-HSA-3928583;R-HSA-3928645  
R-HSA-8942607  
R-HSA-8942607  
R-HSA-199043;R-HSA-9606163;R-HSA-2025882;R-HSA-983147;R-HSA-388833;R-HSA-1236955;R-HSA-983140;R-HSA-8952289  
R-HSA-211239;R-HSA-211247  
R-HSA-4093327;R-HSA-3928607;R-HSA-3928604;R-HSA-3928642;R-HSA-3928628  
R-HSA-168166  
R-HSA-427910;R-HSA-2744349;R-HSA-2744242  
R-HSA-2454081  
R-HSA-2309779;R-HSA-2309787;R-HSA-2314686;R-HSA-2309773  
R-HSA-2309773  
R-HSA-4084999;R-HSA-9638120  
R-HSA-9728804  
R-HSA-2327738  
R-HSA-9664275;R-HSA-9664278;R-HSA-9664261  
R-HSA-481007  
R-HSA-392133;R-HSA-8982018;R-HSA-8982021;R-HSA-8981892  
R-HSA-427910;R-HSA-5617182;R-HSA-5578777  
R-HSA-205039  
R-HSA-6806629;R-HSA-6805573;R-HSA-6814734;R-HSA-6814764;R-HSA-6805546;R-HSA-6806613;R-HSA-6810357;R-HSA-9013145;R-HSA-9013161;R-HSA-9014424;R-HSA-9018808;R-HSA-9013144;R-HSA-9693125;R-HSA-8980691;R-HSA-481007  
R-HSA-8870469;R-HSA-8870466  
R-HSA-420598;R-HSA-419011;R-HSA-433711;R-HSA-419003  
R-HSA-9009371;R-HSA-9625479;R-HSA-5362518;R-HSA-9018494;R-HSA-9018497;R-HSA-9018499;R-HSA-9625465;R-HSA-1454757;R-HSA-1564142;R-HSA-2537499  
R-HSA-450292;R-HSA-450325  
R-HSA-8944104;R-HSA-8944078

E8\_severecontrol\_down\_reactome

R-HSA-375151  
R-HSA-9707659  
R-HSA-382054  
R-HSA-399942;R-HSA-399941;R-HSA-399939;R-HSA-399951;R-HSA-399946;R-HSA-399947;R-HSA-399944;R-HSA-4  
R-HSA-4647594  
R-HSA-1483159;R-HSA-1482884;R-HSA-1482612;R-HSA-1482533;R-HSA-1482547;R-HSA-444433;R-HSA-1482685;R  
R-HSA-517731  
R-HSA-5690702  
R-HSA-427910  
R-HSA-192123  
R-HSA-879221;R-HSA-877361  
R-HSA-76416;R-HSA-76354;R-HSA-76453;R-HSA-211910;R-HSA-212005;R-HSA-211881;R-HSA-76397;R-HSA-143468  
R-HSA-914010  
R-HSA-5362518  
R-HSA-1605624;R-HSA-1606312;R-HSA-1605724  
R-HSA-193393;R-HSA-192054;R-HSA-193460;R-HSA-192042;R-HSA-193497;R-HSA-191999  
R-HSA-450292;R-HSA-450325  
R-HSA-435171;R-HSA-444433  
R-HSA-9013109  
R-HSA-2465883  
R-HSA-205039  
R-HSA-9036061;R-HSA-2265534  
R-HSA-1989759  
R-HSA-6806412;R-HSA-6806394  
R-HSA-4088218;R-HSA-4539779;R-HSA-216040;R-HSA-2327695  
R-HSA-419166  
R-HSA-9035960;R-HSA-5602170  
R-HSA-1989759  
R-HSA-9020261  
R-HSA-1222376  
R-HSA-2025882;R-HSA-9690461  
R-HSA-76416;R-HSA-76354;R-HSA-76453;R-HSA-211910;R-HSA-212005;R-HSA-211881;R-HSA-211983;R-HSA-76397  
R-HSA-8983688;R-HSA-8983680;R-HSA-8983671  
R-HSA-8877311  
R-HSA-420598;R-HSA-419011;R-HSA-433711;R-HSA-419003  
R-HSA-9606163;R-HSA-983709;R-HSA-2025882;R-HSA-5690702;R-HSA-9690461  
R-HSA-420688  
R-HSA-2562564;R-HSA-211239;R-HSA-211247  
R-HSA-2197697;R-HSA-2029467;R-HSA-2029272;R-HSA-2029273;R-HSA-2029270;R-HSA-2029271;R-HSA-1861621;F  
R-HSA-9664275;R-HSA-9664278;R-HSA-9664261  
R-HSA-9664275;R-HSA-9664278;R-HSA-9664261  
R-HSA-388833;R-HSA-388829;R-HSA-388831  
R-HSA-3928602;R-HSA-3928607;R-HSA-4093336;R-HSA-3928604;R-HSA-3928627;R-HSA-3928628;R-HSA-3928651;F  
R-HSA-9013161;R-HSA-9626832;R-HSA-5668629;R-HSA-5218827;R-HSA-5668735;R-HSA-5668605;R-HSA-5668731;F  
R-HSA-9606163;R-HSA-983709  
R-HSA-5668454;R-HSA-5668534;R-HSA-5668789;R-HSA-5676593;R-HSA-5668481;R-HSA-5668414;R-HSA-5676591  
R-HSA-168166  
R-HSA-139842;R-HSA-453200;R-HSA-481007;R-HSA-437118;R-HSA-453183;R-HSA-114600  
R-HSA-2730860;R-HSA-2730884  
R-HSA-2134519;R-HSA-2134506;R-HSA-170846  
R-HSA-139842;R-HSA-432295;R-HSA-158982;R-HSA-481007;R-HSA-114600;R-HSA-202703;R-HSA-418442;R-HSA-15  
R-HSA-399978  
R-HSA-9013161;R-HSA-9626832;R-HSA-5668629;R-HSA-5218827;R-HSA-5668735;R-HSA-5668605;R-HSA-5668731;F



E8\_severecontrol\_down\_reactome

R-HSA-8948232;R-HSA-8944265;R-HSA-2002460;R-HSA-8948234;R-HSA-4539779;R-HSA-8948224;R-HSA-8948226;R-HSA-3790137;R-HSA-4568740;R-HSA-3222546;R-HSA-4568737;R-HSA-517731;R-HSA-3857308;R-HSA-3797202;R-HSA-1013020;R-HSA-420688;R-HSA-1013013;R-HSA-1013012  
R-HSA-427910;R-HSA-5617182;R-HSA-5578777  
R-HSA-399942;R-HSA-399941;R-HSA-399939;R-HSA-3928627;R-HSA-399951;R-HSA-399946;R-HSA-399947;R-HSA-5633414;R-HSA-5633441;R-HSA-6806412;R-HSA-6806394  
R-HSA-8870346;R-HSA-2309773  
R-HSA-9624033;R-HSA-9698926  
R-HSA-435171;R-HSA-444433  
R-HSA-9035960;R-HSA-9036061;R-HSA-4341669;R-HSA-2265534;R-HSA-5602170  
R-HSA-983147;R-HSA-983157;R-HSA-983156;R-HSA-983140  
R-HSA-8944104;R-HSA-8944078  
R-HSA-193792;R-HSA-192042;R-HSA-193737;R-HSA-193393;R-HSA-193713;R-HSA-192054;R-HSA-193719;R-HSA-1013020;R-HSA-420688;R-HSA-1013013;R-HSA-1013012  
R-HSA-8944104;R-HSA-8944078  
R-HSA-1483159;R-HSA-193792;R-HSA-1605724;R-HSA-9027532;R-HSA-9018880;R-HSA-193737;R-HSA-1483096;R-HSA-76416;R-HSA-76354;R-HSA-76453;R-HSA-211910;R-HSA-212005;R-HSA-211881;R-HSA-211983;R-HSA-76399  
R-HSA-4084999;R-HSA-9638120  
R-HSA-2309779;R-HSA-2309787;R-HSA-2314686;R-HSA-2309773;R-HSA-2161951  
R-HSA-427910;R-HSA-2744349;R-HSA-435171;R-HSA-444433;R-HSA-2744242  
R-HSA-2468039;R-HSA-2473152;R-HSA-8942607  
R-HSA-8868071;R-HSA-8866279;R-HSA-8868230;R-HSA-8867756;R-HSA-8868236;R-HSA-8868651;R-HSA-8867754;R-HSA-2468039;R-HSA-2473152;R-HSA-8942607  
R-HSA-9728804;R-HSA-9679044;R-HSA-9690461  
R-HSA-8870469;R-HSA-8870466;R-HSA-162836;R-HSA-914010;R-HSA-8952289;R-HSA-4084999;R-HSA-162729;R-HSA-8868071;R-HSA-8866279;R-HSA-8868230;R-HSA-8867756;R-HSA-8868236;R-HSA-8868651;R-HSA-8867754;R-HSA-70569  
R-HSA-9664275;R-HSA-9728804;R-HSA-9624033;R-HSA-449058;R-HSA-9664278;R-HSA-9664261;R-HSA-9679044;R-HSA-77609;R-HSA-83677  
R-HSA-9664275;R-HSA-9670418;R-HSA-9670417;R-HSA-9670416;R-HSA-9664278;R-HSA-3656382;R-HSA-9670426;R-HSA-9768950;R-HSA-5633414;R-HSA-9768945;R-HSA-5633441;R-HSA-8865491;R-HSA-8865505;R-HSA-6806412;R-HSA-9768950;R-HSA-5633414;R-HSA-9768945;R-HSA-5633441;R-HSA-8865491;R-HSA-8865505;R-HSA-6806412;R-HSA-976734;R-HSA-8870469;R-HSA-8870466;R-HSA-162836;R-HSA-914010;R-HSA-8952289;R-HSA-4084999;R-HSA-9768950;R-HSA-5633414;R-HSA-9768945;R-HSA-5633441;R-HSA-8865491;R-HSA-8865505;R-HSA-6806412;R-HSA-2454081  
R-HSA-76416;R-HSA-1483159;R-HSA-193792;R-HSA-9018880;R-HSA-73608;R-HSA-211983;R-HSA-1482884;R-HSA-7

E8\_severecontrol\_down\_reactome

354;R-HSA-6783524;R-HSA-5432849;R-HSA-5432852;R-HSA-937029;R-HSA-6800426;R-HSA-450  
HSA-5621354;R-HSA-5432849;R-HSA-166726;R-HSA-2730860;R-HSA-5432852;R-HSA-2569057;R-  
R-HSA-1031713;R-HSA-8937656;R-HSA-5668454;R-HSA-446130;R-HSA-9676071;R-HSA-448703;F  
90036;R-HSA-6789524;R-HSA-446130;R-HSA-912629;R-HSA-448703;R-HSA-445757;R-HSA-44575  
621032;R-HSA-9612073;R-HSA-9616105;R-HSA-9616110;R-HSA-9616367;R-HSA-9612076  
621032;R-HSA-9612073;R-HSA-9616105;R-HSA-9616110;R-HSA-9616367;R-HSA-9612076  
373791;R-HSA-373087;R-HSA-749456;R-HSA-375395;R-HSA-444527;R-HSA-380073;R-HSA-39191

621032;R-HSA-9612073;R-HSA-9616105;R-HSA-9616110;R-HSA-9616367;R-HSA-9612076

621032;R-HSA-9612073;R-HSA-9616105;R-HSA-9616110;R-HSA-9616367;R-HSA-9612076

E8\_severecontrol\_down\_reactome

166175;R-HSA-2562564;R-HSA-936941;R-HSA-168166;R-HSA-166119;R-HSA-166245;R-HSA-5362

06;R-HSA-9621035;R-HSA-9621032;R-HSA-9612073;R-HSA-9612076;R-HSA-1433514;R-HSA-205

R-HSA-9709454;R-HSA-9621385;R-HSA-9031575;R-HSA-9013161;R-HSA-9012651;R-HSA-901265

A-166091;R-HSA-2562541;R-HSA-2201322;R-HSA-937029;R-HSA-6805943;R-HSA-168915;R-HSA

E8\_severecontrol\_down\_reactome

37075;R-HSA-936947

E8\_severecontrol\_down\_reactome

006332;R-HSA-9012657;R-HSA-9006323;R-HSA-9006325

980233;R-HSA-1981157;R-HSA-1981120

E8\_severecontrol\_down\_reactome

9935;R-HSA-399933;R-HSA-3928583;R-HSA-399930;R-HSA-399931;R-HSA-399928;R-HSA-39994.

17207;R-HSA-4093336;R-HSA-9614773;R-HSA-3928604;R-HSA-9614778;R-HSA-5617661;R-HSA-

E8\_severecontrol\_down\_reactome

84501;R-HSA-2089971;R-HSA-2327695;R-HSA-1981104;R-HSA-2396234;R-HSA-2559639;R-HSA-

A-399934;R-HSA-3928642;R-HSA-399935;R-HSA-399933;R-HSA-3928583;R-HSA-399930;R-HSA-

5;R-HSA-9020261;R-HSA-2309773;R-HSA-2309779;R-HSA-1606312;R-HSA-193393;R-HSA-19371-

02353;R-HSA-5602672;R-HSA-4341669;R-HSA-5602170;R-HSA-9728804;R-HSA-9035960;R-HSA-

HSA-1482685;R-HSA-514604;R-HSA-2309773;R-HSA-2309779;R-HSA-1606312;R-HSA-193713;R-

E8\_severecontrol\_down\_reactome

133;R-HSA-6800434;R-HSA-1168456;R-HSA-1168459;R-HSA-983147;R-HSA-375395;R-HSA-5676!  
HSA-2730862;R-HSA-2730851;R-HSA-937029;R-HSA-6800426;R-HSA-6800434;R-HSA-210274;R-  
R-HSA-445757;R-HSA-445752;R-HSA-446648;R-HSA-8937654;R-HSA-445753;R-HSA-507719;R-HS  
52;R-HSA-446648;R-HSA-8937654;R-HSA-912627;R-HSA-445753

L3;R-HSA-379048;R-HSA-374251;R-HSA-373813;R-HSA-444661;R-HSA-8982012

2486;R-HSA-2201293;R-HSA-937059;R-HSA-937022;R-HSA-450358;R-HSA-450292;R-HSA-936952

244;R-HSA-9031624;R-HSA-1433428;R-HSA-5218827;R-HSA-9031616;R-HSA-9612483;R-HSA-14:

0;R-HSA-9620663;R-HSA-9012654;R-HSA-5668735;R-HSA-1470012;R-HSA-1470010;R-HSA-5668:

-2262775;R-HSA-166362;R-HSA-166363;R-HSA-2262777;R-HSA-2201338;R-HSA-168921;R-HSA-9

E8\_severecontrol\_down\_reactome

2;R-HSA-9619667;R-HSA-399941;R-HSA-399939;R-HSA-399951;R-HSA-399946;R-HSA-399947;R-

9621410;R-HSA-9621411;R-HSA-4093327;R-HSA-6806613;R-HSA-3928584;R-HSA-6806610;R-HS.

E8\_severecontrol\_down\_reactome

2328145;R-HSA-1454757;R-HSA-8948219;R-HSA-2213207;R-HSA-8948222;R-HSA-2426450;R-HS

399931;R-HSA-3928645;R-HSA-399928

3;R-HSA-1482533;R-HSA-192054;R-HSA-193719;R-HSA-193460;R-HSA-193780;R-HSA-2309787;F

9624033;R-HSA-879221;R-HSA-448703;R-HSA-5602606;R-HSA-877361;R-HSA-9698926

HSA-1482533;R-HSA-192054;R-HSA-193719;R-HSA-193460;R-HSA-2309787;R-HSA-76475;R-HSA

E8\_severecontrol\_down\_reactome

593;R-HSA-5668414;R-HSA-9705726;R-HSA-983140;R-HSA-937059;R-HSA-2559568;R-HSA-87922  
HSA-166753;R-HSA-375395;R-HSA-166245;R-HSA-5362486;R-HSA-937059;R-HSA-5607738;R-HS  
SA-6783524;R-HSA-6784160;R-HSA-9674563;R-HSA-9674562;R-HSA-450133;R-HSA-9674816;R-H

;R-HSA-2559568;R-HSA-2213017;R-HSA-937079;R-HSA-936951;R-HSA-166072;R-HSA-166271;R

33542;R-HSA-5218841;R-HSA-9612493;R-HSA-1433418;R-HSA-9620723;R-HSA-382054;R-HSA-96

731;R-HSA-1470009;R-HSA-373813;R-HSA-9018808;R-HSA-9613219;R-HSA-9021627;R-HSA-9613

36941;R-HSA-168166;R-HSA-166119;R-HSA-166245;R-HSA-5362486;R-HSA-2201293;R-HSA-937

E8\_severecontrol\_down\_reactome

HSA-399944;R-HSA-9614787;R-HSA-9613760;R-HSA-9614790;R-HSA-416723;R-HSA-399952;R-H

A-9618725;R-HSA-399934;R-HSA-399935;R-HSA-9617064;R-HSA-399933;R-HSA-3928583;R-HSA

E8\_severecontrol\_down\_reactome

A-1564142;R-HSA-1981157;R-HSA-2537499;R-HSA-2465883

R-HSA-193787;R-HSA-192123;R-HSA-191999;R-HSA-1482856;R-HSA-2161951

R-HSA-2161951;R-HSA-2090079;R-HSA-76354;R-HSA-1605724;R-HSA-9027532;R-HSA-211910;R-HSA-

E8\_severecontrol\_down\_reactome

21;R-HSA-937079;R-HSA-5676591;R-HSA-983157;R-HSA-983156;R-HSA-937075;R-HSA-9606163;  
A-6801687;R-HSA-2730843;R-HSA-2559568;R-HSA-210292;R-HSA-879221;R-HSA-2730833;R-HS  
ISA-9674567;R-HSA-5668481;R-HSA-1168456;R-HSA-446684;R-HSA-1168459;R-HSA-9707977;R-I

-HSA-937075;R-HSA-936947

912534;R-HSA-1433456;R-HSA-1472121;R-HSA-9612514;R-HSA-9612516;R-HSA-9616105;R-HSA-

3476;R-HSA-9012657;R-HSA-165692;R-HSA-9027273;R-HSA-9031624;R-HSA-1433428;R-HSA-902  
'059;R-HSA-450292;R-HSA-936952;R-HSA-2559568;R-HSA-937079;R-HSA-936951;R-HSA-166271

E8\_severecontrol\_down\_reactome

ISA-9613768;R-HSA-9619657;R-HSA-9616116;R-HSA-375151;R-HSA-9618559;R-HSA-3928651;R-I

-399930;R-HSA-6814298;R-HSA-399931;R-HSA-399928;R-HSA-399942;R-HSA-9619667;R-HSA-39

E8\_severecontrol\_down\_reactome

1475025;R-HSA-193737;R-HSA-8870346;R-HSA-1483096;R-HSA-211929;R-HSA-193497;R-HSA-4!

E8\_severecontrol\_down\_reactome

R-HSA-8852481;R-HSA-983709;R-HSA-166041;R-HSA-6798528;R-HSA-6789325;R-HSA-9674808;I  
A-937079;R-HSA-166271;R-HSA-937075;R-HSA-6789092;R-HSA-2029467;R-HSA-8852481;R-HSA  
HSA-446694;R-HSA-5668534;R-HSA-446692;R-HSA-5668789;R-HSA-168166;R-HSA-5676593;R-H

-1433454;R-HSA-9616110;R-HSA-9616367;R-HSA-1433451

?7272;R-HSA-9626832;R-HSA-9027275;R-HSA-5668629;R-HSA-9027274;R-HSA-5218827;R-HSA-8  
;R-HSA-937075;R-HSA-936947

E8\_severecontrol\_down\_reactome

HSA-3928648;R-HSA-437234;R-HSA-3928642;R-HSA-3928645

9941;R-HSA-381377;R-HSA-9616214;R-HSA-399939;R-HSA-399951;R-HSA-6814764;R-HSA-3999

E8\_severecontrol\_down\_reactome

53339;R-HSA-1482825;R-HSA-1475017;R-HSA-1605624;R-HSA-1989759;R-HSA-9026408;R-HSA-1

E8\_severecontrol\_down\_reactome

R-HSA-446634;R-HSA-446130;R-HSA-2213017;R-HSA-448703;R-HSA-166072;R-HSA-446648;R-HSA-166792;R-HSA-166286;R-HSA-2029458;R-HSA-2029459;R-HSA-166284;R-HSA-6799350;R-HSA-5668414;R-HSA-6790029;R-HSA-9705726;R-HSA-446701;R-HSA-9705467;R-HSA-450292;R-HSA-

E8\_severecontrol\_down\_reactome

!944078;R-HSA-9031616;R-HSA-9612483;R-HSA-9009371;R-HSA-9626816;R-HSA-9626817;R-HSA

E8\_severecontrol\_down\_reactome

46;R-HSA-6805546;R-HSA-399947;R-HSA-399944;R-HSA-9614787;R-HSA-9613760;R-HSA-68143

E8\_severecontrol\_down\_reactome

L482612;R-HSA-2025724;R-HSA-9020261;R-HSA-76397;R-HSA-399978;R-HSA-143468;R-HSA-193

E8\_severecontrol\_down\_reactome

SA-166082;R-HSA-964811;R-HSA-2201316;R-HSA-2454240;R-HSA-2029272;R-HSA-6784160;R-HSA-2559414;R-HSA-8870678;R-HSA-2029452;R-HSA-2029453;R-HSA-2029451;R-HSA-2029449;R-HSA-

SA-6790036;R-HSA-6789524;R-HSA-912629;R-HSA-5676591;R-HSA-8983671;R-HSA-912627

E8\_severecontrol\_down\_reactome

\-165718;R-HSA-443986;R-HSA-5218841;R-HSA-9693125;R-HSA-420688;R-HSA-9679044;R-HSA-

E8\_severecontrol\_down\_reactome

87;R-HSA-9614790;R-HSA-416723;R-HSA-6809393;R-HSA-399952;R-HSA-6809663;R-HSA-961371

E8\_severecontrol\_down\_reactome

1393;R-HSA-193780;R-HSA-192123;R-HSA-193787;R-HSA-1630306;R-HSA-191999;R-HSA-148285

E8\_severecontrol\_down\_reactome

3A-2029273;R-HSA-2029270;R-HSA-166091;R-HSA-2029271;R-HSA-2029268;R-HSA-2201322;R-HSA-5660622;R-HSA-166041;R-HSA-5660663;R-HSA-2730888;R-HSA-8869667;R-HSA-6798528;R-HSA-

E8\_severecontrol\_down\_reactome

419166;R-HSA-9027281;R-HSA-9027280;R-HSA-8980691;R-HSA-373087;R-HSA-9024723;R-HSA-

E8\_severecontrol\_down\_reactome

68;R-HSA-9619657;R-HSA-5617672;R-HSA-6810937;R-HSA-9616243;R-HSA-381283;R-HSA-9616:

E8\_severecontrol\_down\_reactome

ISA-9674816;R-HSA-2262775;R-HSA-5668481;R-HSA-388829;R-HSA-446684;R-HSA-388831;R-HSA-5432825;R-HSA-2730882;R-HSA-8852266;R-HSA-2730884;R-HSA-2730886;R-HSA-6789072;R-

E8\_severecontrol\_down\_reactome

170846;R-HSA-9612493;R-HSA-1433418;R-HSA-9024726;R-HSA-8944104;R-HSA-9620723;R-HSA

E8\_severecontrol\_down\_reactome

116;R-HSA-8865505;R-HSA-6814734;R-HSA-375151;R-HSA-9618559;R-HSA-9634429;R-HSA-3928

E8\_severecontrol\_down\_reactome

;A-2262777;R-HSA-2201338;R-HSA-8862300;R-HSA-446694;R-HSA-2197697;R-HSA-5668534;R-H  
HSA-2213017;R-HSA-166072;R-HSA-2029476;R-HSA-166082;R-HSA-964811;R-HSA-2201316;R-H

E8\_severecontrol\_down\_reactome

-382054;R-HSA-9612534;R-HSA-1433456;R-HSA-375395;R-HSA-444527;R-HSA-9009378;R-HSA-1

E8\_severecontrol\_down\_reactome

3651;R-HSA-3928648;R-HSA-6811539;R-HSA-437234;R-HSA-977271;R-HSA-3928642;R-HSA-5617

E8\_severecontrol\_down\_reactome

SA-446692;R-HSA-168166;R-HSA-388833;R-HSA-166119;R-HSA-2454208;R-HSA-446701;R-HSA-:  
SA-2454240;R-HSA-2029272;R-HSA-2029273;R-HSA-2029270;R-HSA-166091;R-HSA-2029271;R-H

E8\_severecontrol\_down\_reactome

.472121;R-HSA-9612514;R-HSA-9626848;R-HSA-8982012;R-HSA-9006332;R-HSA-9612516;R-HSA/

E8\_severecontrol\_down\_reactome

'454;R-HSA-977392;R-HSA-3928645

E8\_severecontrol\_down\_reactome

2201293;R-HSA-6798474;R-HSA-450292;R-HSA-5624486;R-HSA-8862320;R-HSA-912629;R-HSA-4  
HSA-2562541;R-HSA-2029268;R-HSA-2201322;R-HSA-6805943;R-HSA-168915;R-HSA-2262775;R

E8\_severecontrol\_down\_reactome

\-9006323;R-HSA-9616105;R-HSA-1433454;R-HSA-9616110;R-HSA-9006325;R-HSA-9616367;R-H

E8\_severecontrol\_down\_reactome

2454239;R-HSA-8983671;R-HSA-2855125;R-HSA-912627;R-HSA-879362;R-HSA-450325;R-HSA-56  
-HSA-6809521;R-HSA-166362;R-HSA-166363;R-HSA-2262777;R-HSA-2201338;R-HSA-168921;R-H

E8\_severecontrol\_down\_reactome

SA-1433451;R-HSA-8982025;R-HSA-8982026;R-HSA-749448;R-HSA-749454;R-HSA-1433488;R-H:

E8\_severecontrol\_down\_reactome

507750;R-HSA-5607745;R-HSA-5362500;R-HSA-5690702;R-HSA-166168;R-HSA-5607758;R-HSA-1  
HSA-8862300;R-HSA-2197697;R-HSA-936941;R-HSA-168166;R-HSA-166119;R-HSA-435171;R-HSA/

E8\_severecontrol\_down\_reactome

SA-749452;R-HSA-8982017;R-HSA-8982019;R-HSA-8982018;R-HSA-8982021;R-HSA-8982020;R-I

E8\_severecontrol\_down\_reactome

.66175;R-HSA-879917;R-HSA-450358;R-HSA-5696358;R-HSA-445757;R-HSA-877361;R-HSA-4457  
A-2454208;R-HSA-1861621;R-HSA-2201293;R-HSA-6798474;R-HSA-6798743;R-HSA-450292;R-HS

E8\_severecontrol\_down\_reactome

HSA-9626880;R-HSA-9029149;R-HSA-205205;R-HSA-9029151;R-HSA-9032478;R-HSA-9029150;R-

E8\_severecontrol\_down\_reactome

52;R-HSA-879411;R-HSA-445753;R-HSA-507719;R-HSA-166726;R-HSA-2730860;R-HSA-2569057  
;A-9021306;R-HSA-5624486;R-HSA-6798739;R-HSA-936952;R-HSA-8862320;R-HSA-6798751;R-H

E8\_severecontrol\_down\_reactome

HSA-749456;R-HSA-9621042;R-HSA-9027373;R-HSA-9621048;R-HSA-9029155;R-HSA-5668605;F

E8\_severecontrol\_down\_reactome

;R-HSA-2730862;R-HSA-2730851;R-HSA-199518;R-HSA-9707977;R-HSA-210274;R-HSA-166753;F  
SA-936951;R-HSA-6798749;R-HSA-2454239;R-HSA-6798748;R-HSA-6798747;R-HSA-936947;R-H:

E8\_severecontrol\_down\_reactome

{-HSA-380073;R-HSA-379048;R-HSA-9029158;R-HSA-205234;R-HSA-205238;R-HSA-1433506;R-H

E8\_severecontrol\_down\_reactome

3-HSA-166245;R-HSA-5362486;R-HSA-5607738;R-HSA-9705467;R-HSA-6801687;R-HSA-2730843;  
SA-6798745;R-HSA-2855125

E8\_severecontrol\_down\_reactome

SA-9621035;R-HSA-9621032;R-HSA-9612073;R-HSA-9612076;R-HSA-1433514;R-HSA-205244;R-I

E8\_severecontrol\_down\_reactome

R-HSA-210292;R-HSA-2730833;R-HSA-166271;R-HSA-199043;R-HSA-9677585;R-HSA-6789092;R

E8\_severecontrol\_down\_reactome

HSA-392133;R-HSA-964811;R-HSA-2134506;R-HSA-1433542;R-HSA-2134519;R-HSA-9027425;R-I

E8\_severecontrol\_down\_reactome

!-HSA-2025882;R-HSA-2029467;R-HSA-446862;R-HSA-6789615;R-HSA-166792;R-HSA-166286;R-I

E8\_severecontrol\_down\_reactome

-ISA-9625465;R-HSA-205039;R-HSA-391913;R-HSA-374251;R-HSA-444661;R-HSA-9018494;R-HS.

E8\_severecontrol\_down\_reactome

-HSA-2029458;R-HSA-2029459;R-HSA-166284;R-HSA-6799350;R-HSA-2559414;R-HSA-8870678;R

E8\_severecontrol\_down\_reactome

A-9013109

E8\_severecontrol\_down\_reactome

-HSA-446868;R-HSA-2029452;R-HSA-2029453;R-HSA-2029451;R-HSA-9705729;R-HSA-2029449;F

E8\_severecontrol\_down\_reactome

R-HSA-9677579;R-HSA-5660622;R-HSA-1015702;R-HSA-1015699;R-HSA-9705738;R-HSA-566066:

E8\_severecontrol\_down\_reactome

3;R-HSA-2730888;R-HSA-9674546;R-HSA-8869667;R-HSA-446894;R-HSA-5432825;R-HSA-273088

E8\_severecontrol\_down\_reactome

32;R-HSA-8852266;R-HSA-2730884;R-HSA-9674558;R-HSA-2730886;R-HSA-9676071;R-HSA-6789

E8\_severecontrol\_down\_reactome

072;R-HSA-2029476;R-HSA-1236955;R-HSA-2562541;R-HSA-9690461;R-HSA-6805943;R-HSA-96

E8\_severecontrol\_down\_reactome

i74563;R-HSA-168915;R-HSA-9674562;R-HSA-9674567;R-HSA-6809521;R-HSA-166362;R-HSA-16

E8\_severecontrol\_down\_reactome

6363;R-HSA-1236939;R-HSA-168921;R-HSA-1236940;R-HSA-1236941;R-HSA-936941;R-HSA-566

E8\_severecontrol\_down\_reactome

8789;R-HSA-435171;R-HSA-1861621;R-HSA-6790029;R-HSA-6798743;R-HSA-6790036;R-HSA-90:

E8\_severecontrol\_down\_reactome

21306;R-HSA-6789524;R-HSA-6798739;R-HSA-1236967;R-HSA-936952;R-HSA-6798751;R-HSA-936952

E8\_severecontrol\_down\_reactome

36951;R-HSA-6798749;R-HSA-6798748;R-HSA-6798747;R-HSA-936947;R-HSA-6798
